# Supplementary material for: A rapid method for assessing seed drought resistance using integrated ID-BOA-SVM
Source: Royal Society of Chemistry journal article supplement (doi:10.1039/d4ay01455c), 2024-01-01
Supplement: d4ay01455c1.xlsx [file d4ay01455c1.xlsx]

## Sheet: Sheet1
Class	11542.2	11538	11533.9	11529.8	11525.7	11521.6	11517.4	11513.3	11509.2	11505.1	11501	11496.9	11492.7	11488.6	11484.5	11480.4	11476.2	11472.1	11468	11463.9	11459.8	11455.6	11451.5	11447.4	11443.3	11439.2	11435.1	11430.9	11426.8	11422.7	11418.6	11414.5	11410.3	11406.2	11402.1	11398	11393.9	11389.8	11385.6	11381.5	11377.4	11373.3	11369.1	11365	11360.9	11356.8	11352.7	11348.5	11344.4
1	0.290177	0.290025	0.289684	0.289478	0.288873	0.288179	0.28811	0.288646	0.289372	0.289509	0.289107	0.288815	0.288815	0.289146	0.289418	0.289281	0.289052	0.289136	0.289326	0.289026	0.288455	0.288326	0.288493	0.288412	0.288007	0.287554	0.287178	0.287067	0.287477	0.288304	0.289372	0.290028	0.289866	0.289297	0.288827	0.288895	0.289288	0.289596	0.289935	0.290379	0.290326	0.289472	0.288884	0.289249	0.289799	0.289981	0.289909	0.289766	0.289697
1	0.279763	0.280577	0.280969	0.280764	0.280185	0.279494	0.279237	0.279612	0.280079	0.280106	0.279854	0.27971	0.279568	0.279412	0.279301	0.279169	0.279301	0.279952	0.280582	0.280477	0.279799	0.279139	0.278916	0.27914	0.279272	0.279045	0.27855	0.27802	0.278077	0.279041	0.280399	0.28083	0.280021	0.279276	0.27931	0.279738	0.280113	0.280476	0.280974	0.281421	0.28123	0.280282	0.279515	0.279627	0.280296	0.281069	0.281409	0.280912	0.280312
1	0.291405	0.291657	0.291351	0.290956	0.290364	0.28964	0.289448	0.290156	0.291081	0.291271	0.290846	0.29067	0.290908	0.291031	0.290878	0.290672	0.290529	0.29068	0.290963	0.290646	0.289885	0.289432	0.289526	0.289777	0.289493	0.288936	0.2887	0.288815	0.289239	0.289876	0.290713	0.291191	0.291008	0.29084	0.290892	0.290948	0.290985	0.291047	0.29118	0.291468	0.291526	0.290769	0.289957	0.290227	0.291029	0.291379	0.291182	0.290858	0.290849
1	0.288937	0.289406	0.289553	0.289131	0.288342	0.288037	0.288475	0.289247	0.289613	0.289275	0.288676	0.288321	0.288471	0.28883	0.288949	0.288834	0.28874	0.288763	0.288875	0.28883	0.288371	0.287896	0.288014	0.288456	0.288178	0.287266	0.286879	0.287337	0.287938	0.28818	0.288555	0.288995	0.288925	0.288714	0.288821	0.28903	0.289083	0.289051	0.289207	0.289694	0.289757	0.288827	0.287853	0.287874	0.288705	0.289623	0.289983	0.289722	0.289368
1	0.302722	0.302747	0.302581	0.302055	0.300974	0.300507	0.30109	0.301872	0.302434	0.302704	0.302603	0.302396	0.302272	0.302307	0.302497	0.302459	0.302301	0.302515	0.302805	0.302615	0.30185	0.301075	0.301041	0.301283	0.301051	0.300793	0.300925	0.30129	0.301622	0.301978	0.302614	0.30274	0.302216	0.302069	0.302193	0.302167	0.30217	0.302188	0.302317	0.302848	0.303147	0.302406	0.301352	0.301204	0.301971	0.302757	0.302664	0.302123	0.302162
1	0.30015	0.300167	0.299856	0.299339	0.298522	0.298125	0.298669	0.299552	0.300135	0.300224	0.300016	0.299725	0.299339	0.299197	0.299391	0.299523	0.299647	0.300118	0.300429	0.299741	0.298636	0.298187	0.298377	0.298551	0.298368	0.298	0.297639	0.297638	0.298189	0.299024	0.299983	0.300325	0.299903	0.299702	0.299771	0.299861	0.300151	0.300555	0.300799	0.300859	0.300658	0.299905	0.299214	0.299313	0.299613	0.299853	0.300079	0.299989	0.299769
1	0.322462	0.322667	0.323019	0.322915	0.321819	0.320783	0.320638	0.321172	0.321982	0.322568	0.322542	0.322165	0.322014	0.322182	0.322196	0.322023	0.322119	0.322484	0.322663	0.322142	0.321283	0.321045	0.321588	0.32194	0.321243	0.320398	0.320471	0.320915	0.321114	0.321581	0.322693	0.323376	0.32302	0.322389	0.321982	0.322043	0.322537	0.322903	0.322942	0.322998	0.322943	0.322322	0.321826	0.322129	0.322589	0.322883	0.322866	0.322496	0.322453
1	0.282779	0.282707	0.28294	0.282964	0.282241	0.281818	0.282213	0.282697	0.282877	0.282955	0.282942	0.282737	0.28257	0.282617	0.282531	0.282165	0.281903	0.281951	0.282262	0.28248	0.28219	0.281734	0.281659	0.281677	0.28132	0.280991	0.281061	0.281177	0.281295	0.281842	0.282991	0.28381	0.283505	0.282692	0.28211	0.281954	0.282276	0.283112	0.283965	0.284218	0.283694	0.282629	0.281879	0.282129	0.282826	0.283134	0.28293	0.282575	0.282651
1	0.304958	0.304984	0.305755	0.305903	0.304589	0.303477	0.303879	0.30495	0.305703	0.305758	0.30532	0.305101	0.304985	0.30477	0.30476	0.304848	0.304885	0.305222	0.305664	0.305342	0.304269	0.303367	0.303286	0.303707	0.303609	0.302874	0.30252	0.30276	0.3028	0.302853	0.303848	0.304865	0.304856	0.304346	0.303915	0.303929	0.304268	0.304697	0.305034	0.305114	0.305019	0.304543	0.303926	0.303858	0.304054	0.304188	0.304352	0.304408	0.304555
1	0.312198	0.312196	0.311904	0.311506	0.311086	0.310996	0.311271	0.31157	0.311826	0.311842	0.311599	0.311504	0.311533	0.311661	0.311718	0.311556	0.311797	0.312585	0.313174	0.312821	0.311851	0.311392	0.311548	0.311506	0.310721	0.309808	0.309683	0.310038	0.310446	0.311109	0.312114	0.312648	0.31234	0.311979	0.311984	0.312001	0.311796	0.311761	0.31199	0.312225	0.312166	0.311663	0.311236	0.311504	0.312272	0.312826	0.312665	0.312126	0.312027
1	0.292885	0.293735	0.293901	0.293533	0.292777	0.29216	0.292279	0.292994	0.293646	0.293731	0.293413	0.293006	0.292733	0.292826	0.292825	0.292507	0.29249	0.292906	0.293293	0.293152	0.292464	0.291786	0.291505	0.2914	0.291106	0.290954	0.291156	0.291341	0.29147	0.291841	0.292571	0.293061	0.293061	0.292882	0.292561	0.292459	0.292801	0.293255	0.29363	0.293859	0.293625	0.29291	0.292299	0.292243	0.292522	0.292823	0.292859	0.292613	0.292576
1	0.319637	0.320188	0.320208	0.31965	0.318825	0.318591	0.318964	0.319359	0.319717	0.319865	0.319334	0.318619	0.318527	0.31891	0.319255	0.319459	0.319713	0.320182	0.320495	0.319968	0.318834	0.31801	0.31796	0.31817	0.317908	0.317265	0.316855	0.317171	0.317922	0.318651	0.31957	0.320216	0.319932	0.319177	0.318787	0.319051	0.319427	0.319608	0.319922	0.32049	0.320536	0.319454	0.318384	0.318575	0.319471	0.319981	0.319944	0.319736	0.319717
1	0.315447	0.315558	0.315726	0.315425	0.314482	0.313888	0.313866	0.314145	0.314686	0.314956	0.314798	0.314545	0.314478	0.314778	0.314907	0.314562	0.314471	0.315011	0.315427	0.315054	0.314292	0.313738	0.313669	0.313665	0.313097	0.312715	0.313046	0.313402	0.313534	0.313702	0.314235	0.314691	0.314576	0.314404	0.314496	0.3146	0.31461	0.314894	0.315453	0.315868	0.315507	0.314209	0.313471	0.314254	0.315206	0.315285	0.314851	0.314384	0.314299
1	0.30122	0.301609	0.301752	0.300997	0.299911	0.29975	0.300329	0.300844	0.30132	0.30161	0.301383	0.300907	0.300645	0.300965	0.301425	0.301363	0.301287	0.301874	0.302284	0.301605	0.300746	0.30042	0.300307	0.300188	0.29983	0.299204	0.298802	0.298921	0.299422	0.300269	0.301272	0.301832	0.301845	0.301746	0.301623	0.301384	0.30126	0.301438	0.301753	0.302132	0.3021	0.30132	0.300771	0.300956	0.301212	0.301438	0.301641	0.30152	0.30144
1	0.30596	0.306184	0.30607	0.305446	0.304431	0.304201	0.304834	0.305389	0.30576	0.305784	0.305446	0.305261	0.305268	0.305379	0.305496	0.305353	0.30526	0.305758	0.306289	0.306044	0.305225	0.304487	0.304392	0.30456	0.304404	0.304432	0.304691	0.304746	0.304811	0.305287	0.306166	0.306582	0.306352	0.306223	0.306073	0.305622	0.305431	0.305804	0.306266	0.306641	0.306761	0.306223	0.305493	0.305434	0.305963	0.30648	0.306532	0.306114	0.305838
1	0.307683	0.307679	0.30729	0.306901	0.306458	0.305923	0.305758	0.306386	0.307292	0.307651	0.30732	0.306878	0.306824	0.30698	0.306909	0.306656	0.306604	0.306793	0.306761	0.306403	0.306094	0.305901	0.305882	0.30589	0.305529	0.305056	0.304998	0.305549	0.30631	0.306876	0.307524	0.307706	0.307295	0.307236	0.307321	0.30713	0.306931	0.307059	0.30743	0.307754	0.307603	0.306737	0.306175	0.30668	0.307539	0.308258	0.308622	0.308323	0.307662
1	0.299282	0.29946	0.29928	0.298835	0.298332	0.298073	0.298164	0.298692	0.299261	0.299204	0.298739	0.298449	0.298461	0.298719	0.298814	0.298589	0.29853	0.298839	0.298906	0.298312	0.297551	0.297097	0.29706	0.29731	0.297317	0.297026	0.297002	0.297303	0.297603	0.297949	0.29868	0.299228	0.29886	0.29817	0.297934	0.298044	0.298152	0.298437	0.298984	0.299586	0.299698	0.298912	0.298064	0.298138	0.298759	0.299047	0.29873	0.298279	0.298429
1	0.301221	0.301513	0.301727	0.301281	0.300587	0.300728	0.301236	0.30154	0.301745	0.301627	0.301327	0.301426	0.30179	0.301934	0.301943	0.301951	0.301986	0.3023	0.302518	0.301903	0.301104	0.301009	0.30098	0.300508	0.300137	0.300122	0.300309	0.300491	0.300499	0.300731	0.301651	0.302411	0.30217	0.301657	0.301516	0.301434	0.301349	0.301623	0.301969	0.302153	0.302208	0.301752	0.301129	0.301162	0.301677	0.302135	0.302263	0.302089	0.302044
1	0.301147	0.301607	0.301369	0.300662	0.300166	0.300247	0.300475	0.30035	0.300171	0.30022	0.300174	0.300135	0.30044	0.300712	0.30052	0.300015	0.299657	0.29986	0.300276	0.300111	0.299408	0.298928	0.299122	0.299527	0.29951	0.299111	0.298849	0.299178	0.29975	0.300043	0.300374	0.300741	0.300834	0.300715	0.30057	0.300824	0.301287	0.30144	0.301435	0.301424	0.301173	0.300616	0.300186	0.300273	0.300604	0.300858	0.300985	0.301134	0.301348
1	0.292432	0.292866	0.292927	0.292383	0.291749	0.291696	0.292064	0.292548	0.292895	0.2928	0.292319	0.292032	0.292188	0.292635	0.292866	0.292412	0.291968	0.292166	0.292571	0.292587	0.292096	0.291578	0.291579	0.291592	0.290857	0.289987	0.289832	0.290228	0.290724	0.29138	0.292312	0.292788	0.292621	0.292402	0.292279	0.292253	0.29243	0.292893	0.293214	0.293238	0.292944	0.292026	0.291195	0.291386	0.292326	0.293297	0.293558	0.293036	0.292633
1	0.283309	0.283951	0.284311	0.284093	0.2834	0.282977	0.282872	0.282702	0.282849	0.283388	0.283465	0.282949	0.282665	0.282819	0.282933	0.2831	0.283391	0.283632	0.283859	0.283625	0.282681	0.281792	0.281685	0.282001	0.28194	0.281487	0.281355	0.281682	0.282094	0.282606	0.283369	0.283899	0.283814	0.283432	0.283089	0.283009	0.283145	0.283416	0.283713	0.283888	0.283799	0.283357	0.283027	0.283221	0.283472	0.283472	0.283519	0.283454	0.283277
1	0.294182	0.294099	0.294414	0.294588	0.293746	0.293006	0.293363	0.294262	0.294783	0.294636	0.294215	0.293779	0.293677	0.294149	0.294421	0.294123	0.294087	0.294775	0.29538	0.295074	0.294198	0.293667	0.293877	0.294165	0.293832	0.293279	0.293142	0.293387	0.293865	0.294363	0.294745	0.294852	0.294596	0.294246	0.293897	0.293704	0.293837	0.294212	0.29459	0.294757	0.29451	0.293894	0.29359	0.293997	0.294664	0.295241	0.295424	0.294909	0.294384
1	0.31202	0.311943	0.311786	0.31174	0.311374	0.311125	0.311144	0.311244	0.311308	0.311313	0.311301	0.311165	0.311009	0.311014	0.311198	0.311431	0.311514	0.311813	0.312184	0.311726	0.310876	0.310513	0.310573	0.310592	0.310193	0.309615	0.309438	0.309678	0.309952	0.310189	0.31079	0.31154	0.311634	0.311173	0.31089	0.310957	0.311095	0.311248	0.311549	0.312145	0.312485	0.311723	0.310708	0.310631	0.310979	0.311417	0.311855	0.311644	0.310955
1	0.311042	0.311315	0.311224	0.31068	0.309849	0.309496	0.309719	0.310054	0.310563	0.311118	0.311158	0.310669	0.310252	0.310232	0.310166	0.310093	0.310331	0.310479	0.310205	0.309534	0.308773	0.308458	0.308791	0.30934	0.309444	0.308945	0.308474	0.308385	0.308553	0.309239	0.31039	0.310954	0.310611	0.310231	0.310188	0.310156	0.309772	0.309667	0.310364	0.311008	0.31087	0.310022	0.309388	0.309613	0.309992	0.310155	0.310132	0.309761	0.309564
1	0.302446	0.302598	0.302788	0.30247	0.301194	0.300647	0.301374	0.301982	0.302157	0.302304	0.302254	0.302001	0.301785	0.301752	0.301699	0.301446	0.301472	0.302085	0.302652	0.302347	0.301304	0.300252	0.29986	0.300128	0.300268	0.300057	0.300087	0.30058	0.300999	0.301224	0.301888	0.302371	0.30199	0.30171	0.301808	0.30197	0.302275	0.302381	0.302394	0.302808	0.302761	0.301672	0.300833	0.300972	0.301451	0.301723	0.301567	0.301215	0.301221
1	0.295119	0.295531	0.295573	0.294996	0.294242	0.294239	0.294858	0.295644	0.296039	0.295654	0.295003	0.294699	0.294738	0.294834	0.294807	0.294852	0.29515	0.295592	0.296028	0.295971	0.295306	0.294726	0.294588	0.294425	0.293903	0.293462	0.293312	0.293315	0.293731	0.29456	0.295374	0.2957	0.295679	0.295594	0.295145	0.294658	0.294757	0.295344	0.295978	0.29649	0.29641	0.295241	0.294293	0.294815	0.295639	0.29593	0.295951	0.29566	0.295409
1	0.300209	0.30043	0.300319	0.299783	0.298888	0.298493	0.298959	0.299745	0.300199	0.300097	0.29978	0.29966	0.2996	0.299489	0.299346	0.299053	0.298872	0.299243	0.299697	0.299443	0.298993	0.298957	0.299142	0.299078	0.298394	0.297837	0.298029	0.298291	0.298348	0.298776	0.299692	0.300238	0.300145	0.299886	0.299458	0.299056	0.299197	0.299721	0.300058	0.300304	0.300295	0.299648	0.299124	0.299412	0.300065	0.300372	0.299995	0.299413	0.299157
1	0.299689	0.300225	0.300382	0.299955	0.298791	0.298047	0.298491	0.299237	0.299621	0.299546	0.298973	0.298644	0.298905	0.299219	0.299312	0.29937	0.29952	0.299661	0.29967	0.29932	0.298609	0.298065	0.298118	0.29823	0.297842	0.297552	0.297885	0.298294	0.298317	0.298415	0.299078	0.299515	0.299058	0.298278	0.297956	0.298315	0.298706	0.298964	0.29951	0.300205	0.300347	0.299528	0.298599	0.298644	0.299328	0.299745	0.299673	0.299473	0.299335
1	0.312512	0.312978	0.312895	0.312367	0.311627	0.311219	0.311404	0.31208	0.312626	0.312427	0.311703	0.311229	0.311397	0.311904	0.312204	0.312078	0.3119	0.312141	0.31227	0.311634	0.310834	0.310469	0.310663	0.311077	0.311092	0.310895	0.310668	0.310361	0.31025	0.31063	0.311621	0.312285	0.312092	0.311786	0.311745	0.311945	0.312274	0.31262	0.312939	0.313301	0.313128	0.31197	0.31099	0.311183	0.311883	0.312251	0.312219	0.311891	0.311612
1	0.319855	0.320359	0.320324	0.31968	0.318695	0.318083	0.318283	0.319212	0.3202	0.320371	0.320139	0.320288	0.320172	0.319751	0.319795	0.320144	0.320536	0.321278	0.321864	0.321153	0.319622	0.318586	0.318557	0.318908	0.318759	0.318248	0.317907	0.318067	0.318667	0.319234	0.319767	0.32016	0.319977	0.319443	0.318978	0.318827	0.319087	0.319599	0.320041	0.320418	0.32072	0.320366	0.319446	0.319098	0.319631	0.320365	0.320675	0.320441	0.320271
1	0.310427	0.310574	0.310477	0.310196	0.30954	0.309071	0.309267	0.309577	0.309824	0.310459	0.311142	0.311047	0.310412	0.309924	0.309555	0.309232	0.30915	0.309716	0.310455	0.31011	0.309054	0.308572	0.308927	0.309263	0.308854	0.308216	0.307925	0.307953	0.308281	0.308912	0.309893	0.310353	0.309835	0.309486	0.309688	0.309935	0.310021	0.310112	0.310365	0.310797	0.31081	0.309865	0.308976	0.309025	0.30947	0.309966	0.310462	0.310554	0.31027
1	0.34115	0.34179	0.342226	0.341906	0.340986	0.340126	0.339976	0.340547	0.340967	0.34087	0.340478	0.340309	0.340589	0.341012	0.341104	0.34083	0.34075	0.341045	0.341208	0.340769	0.339885	0.339254	0.339447	0.339856	0.339651	0.339053	0.33896	0.339584	0.340086	0.340238	0.340665	0.341098	0.34097	0.340666	0.34063	0.340827	0.340831	0.340744	0.340949	0.34135	0.34134	0.340499	0.339584	0.339396	0.339934	0.340643	0.340757	0.34021	0.339678
1	0.327673	0.328134	0.328194	0.32763	0.326664	0.32617	0.326597	0.327499	0.328216	0.328366	0.328004	0.327709	0.327672	0.32757	0.327272	0.326997	0.327081	0.327556	0.327915	0.327569	0.326996	0.326797	0.326847	0.326858	0.326501	0.32603	0.325867	0.325896	0.326138	0.326774	0.327766	0.328271	0.327711	0.326902	0.326542	0.326704	0.32714	0.327555	0.32786	0.328105	0.32776	0.326533	0.325879	0.326414	0.32695	0.327165	0.327183	0.32686	0.326621
1	0.320875	0.321312	0.321424	0.321113	0.32028	0.319716	0.319975	0.320591	0.32085	0.320651	0.320326	0.320353	0.320523	0.32017	0.319635	0.319579	0.319899	0.320426	0.320852	0.320464	0.31948	0.318777	0.31881	0.319137	0.319048	0.318831	0.318871	0.318937	0.318896	0.319152	0.320016	0.320493	0.319991	0.31943	0.319315	0.319631	0.320084	0.320352	0.320551	0.320732	0.320603	0.319853	0.319012	0.3191	0.31988	0.32035	0.320203	0.319769	0.319654
1	0.31421	0.314524	0.314474	0.313784	0.312972	0.312789	0.31314	0.31344	0.313499	0.313424	0.313328	0.31351	0.313794	0.313824	0.313723	0.313552	0.313424	0.313733	0.314118	0.313661	0.31276	0.312395	0.312618	0.312742	0.31236	0.311872	0.311661	0.31168	0.311836	0.312327	0.31323	0.313847	0.31378	0.313267	0.312802	0.312856	0.313052	0.313252	0.313613	0.313952	0.313936	0.313204	0.312469	0.312573	0.313024	0.3134	0.313559	0.313234	0.312916
1	0.317718	0.317688	0.317263	0.316972	0.316731	0.316711	0.317011	0.31742	0.31776	0.317624	0.317091	0.31692	0.317267	0.31765	0.317318	0.316537	0.316452	0.317119	0.31768	0.317479	0.316716	0.316063	0.316007	0.316109	0.315975	0.316055	0.316208	0.316103	0.315964	0.316142	0.316944	0.317735	0.317664	0.317051	0.316526	0.316486	0.31679	0.316997	0.317202	0.317627	0.317765	0.317006	0.316163	0.316391	0.317133	0.317512	0.3174	0.316857	0.316617
1	0.307664	0.308071	0.30813	0.307998	0.307405	0.306435	0.305866	0.306192	0.306828	0.307056	0.306913	0.30681	0.307008	0.307472	0.307847	0.307769	0.307364	0.307515	0.308188	0.30802	0.307102	0.30666	0.306883	0.306937	0.306452	0.305901	0.305757	0.306026	0.306351	0.306696	0.307134	0.307311	0.307193	0.306992	0.306727	0.306759	0.307186	0.307635	0.307991	0.308344	0.308335	0.3075	0.306686	0.306966	0.307868	0.308381	0.30792	0.307016	0.306851
1	0.308128	0.308434	0.308652	0.308323	0.307273	0.306399	0.306306	0.306963	0.307843	0.308185	0.307944	0.307592	0.307337	0.307299	0.307314	0.307272	0.307493	0.307931	0.308135	0.307667	0.306894	0.306729	0.307182	0.307219	0.306451	0.305795	0.305729	0.305913	0.306125	0.306457	0.307262	0.307811	0.307311	0.306674	0.306642	0.30702	0.307374	0.307505	0.307702	0.308129	0.308111	0.307188	0.306483	0.306827	0.307437	0.307767	0.307834	0.307799	0.307947
1	0.321847	0.321816	0.321632	0.321429	0.32088	0.320381	0.320453	0.320859	0.321122	0.320978	0.320738	0.320738	0.320762	0.320677	0.320541	0.320611	0.321069	0.321601	0.321574	0.320769	0.319892	0.319513	0.319607	0.319975	0.320101	0.319769	0.319486	0.319413	0.319456	0.319814	0.320471	0.320961	0.321044	0.32088	0.32073	0.32084	0.320949	0.321121	0.321653	0.322184	0.322047	0.321067	0.320155	0.320245	0.32096	0.321451	0.321284	0.320495	0.319985
1	0.300092	0.300539	0.300051	0.299204	0.298583	0.298409	0.298696	0.299248	0.299834	0.299995	0.299476	0.298822	0.298585	0.299057	0.299638	0.29973	0.299763	0.300064	0.300269	0.299646	0.298498	0.297962	0.298109	0.298099	0.297688	0.297261	0.29711	0.297161	0.297472	0.298283	0.299296	0.299621	0.299198	0.298878	0.2988	0.298806	0.298873	0.298903	0.299009	0.299489	0.299805	0.299147	0.298424	0.298762	0.299556	0.300026	0.300037	0.299751	0.299701
1	0.315062	0.315484	0.315556	0.315601	0.316113	0.316267	0.315658	0.315101	0.314701	0.314169	0.314044	0.314899	0.315951	0.316137	0.315413	0.314679	0.314619	0.314774	0.314961	0.315314	0.315625	0.315833	0.315836	0.315294	0.314612	0.314737	0.315433	0.315635	0.315037	0.314537	0.314889	0.315553	0.315499	0.314979	0.315207	0.315943	0.316114	0.315772	0.315739	0.31618	0.316425	0.316127	0.31568	0.315587	0.315554	0.315325	0.315471	0.315913	0.316063
1	0.312959	0.313288	0.3132	0.3129	0.313086	0.313558	0.313768	0.313456	0.312467	0.311419	0.31121	0.311936	0.312711	0.312792	0.312301	0.311986	0.312272	0.312339	0.311946	0.312038	0.312746	0.313485	0.313732	0.313249	0.312746	0.312835	0.313199	0.31318	0.312579	0.312134	0.312291	0.312575	0.312461	0.312328	0.312763	0.313331	0.313501	0.313533	0.313878	0.314237	0.313957	0.313326	0.313099	0.31334	0.313474	0.31326	0.313107	0.313187	0.3134
1	0.311572	0.312287	0.312597	0.312382	0.312398	0.312675	0.312436	0.311669	0.310933	0.310798	0.311453	0.312355	0.312783	0.31267	0.312315	0.312054	0.312057	0.31201	0.311803	0.311866	0.312229	0.312488	0.3128	0.312908	0.31263	0.312674	0.312785	0.312192	0.31125	0.311093	0.311896	0.312403	0.311774	0.310988	0.311336	0.31238	0.313018	0.313228	0.313526	0.31375	0.313407	0.312536	0.311759	0.311671	0.31215	0.312494	0.312432	0.312476	0.312895
1	0.305428	0.305627	0.305612	0.305477	0.3057	0.306262	0.306372	0.30579	0.304719	0.304079	0.30449	0.305419	0.306066	0.30602	0.305338	0.304618	0.304483	0.304608	0.304543	0.304572	0.304765	0.304978	0.305521	0.306026	0.305952	0.305704	0.305707	0.305841	0.305644	0.305178	0.305233	0.305637	0.305213	0.30454	0.304941	0.305892	0.306391	0.306415	0.306477	0.306585	0.306369	0.306105	0.306116	0.306354	0.306526	0.306172	0.305872	0.306307	0.306891
1	0.312482	0.312656	0.312707	0.312698	0.312823	0.31293	0.312683	0.312454	0.312315	0.31196	0.311653	0.311956	0.312534	0.312701	0.312368	0.311966	0.312095	0.31231	0.31212	0.312045	0.312158	0.312189	0.312311	0.312409	0.312397	0.31245	0.312456	0.312309	0.311982	0.311684	0.311877	0.31246	0.312625	0.312327	0.312354	0.312762	0.313095	0.313214	0.313396	0.313743	0.313904	0.313728	0.313414	0.313219	0.313227	0.313325	0.313397	0.31356	0.314059
1	0.32596	0.326769	0.327265	0.327538	0.32782	0.327708	0.327062	0.326119	0.324969	0.324549	0.325213	0.326058	0.326464	0.326435	0.32612	0.326022	0.32646	0.326809	0.326921	0.32724	0.327474	0.327365	0.32728	0.327071	0.326647	0.326619	0.326903	0.32681	0.326276	0.326077	0.326727	0.327356	0.326985	0.326299	0.326226	0.3267	0.327243	0.32729	0.327183	0.327465	0.327359	0.326753	0.326837	0.327412	0.327371	0.327078	0.327227	0.327526	0.327716
1	0.306396	0.30679	0.307203	0.307642	0.307898	0.307849	0.307577	0.307258	0.306773	0.306492	0.306812	0.307529	0.307832	0.307321	0.306555	0.306156	0.306427	0.306768	0.306643	0.306596	0.306777	0.306981	0.30728	0.307313	0.307307	0.307623	0.307708	0.307352	0.306893	0.306439	0.306264	0.306673	0.306945	0.306928	0.30719	0.307327	0.307332	0.307659	0.307956	0.308075	0.308254	0.308407	0.308466	0.308375	0.307999	0.307666	0.307825	0.308129	0.308267
1	0.326749	0.327314	0.327423	0.327091	0.32713	0.327483	0.327417	0.32704	0.326495	0.325849	0.325524	0.325782	0.326361	0.326894	0.326896	0.32647	0.326337	0.326185	0.325957	0.326231	0.326486	0.326454	0.326658	0.326702	0.326443	0.326582	0.327067	0.327063	0.326159	0.325364	0.325621	0.32622	0.326127	0.325831	0.326288	0.327125	0.327558	0.327588	0.327668	0.327738	0.327285	0.326494	0.326156	0.326552	0.327095	0.327106	0.326811	0.32679	0.32708
1	0.3238	0.323914	0.323939	0.324122	0.324483	0.32474	0.324603	0.32413	0.323408	0.322874	0.322883	0.323062	0.323339	0.323692	0.323595	0.323219	0.32305	0.323002	0.323101	0.323422	0.323848	0.324246	0.324469	0.324386	0.324162	0.324121	0.324113	0.323818	0.323446	0.323265	0.323459	0.324022	0.324188	0.323992	0.324185	0.324495	0.324582	0.324543	0.324503	0.324777	0.325077	0.32466	0.323922	0.32369	0.323835	0.324141	0.324581	0.324896	0.325085
1	0.31657	0.316554	0.316286	0.316228	0.316552	0.316738	0.316733	0.316854	0.316471	0.315719	0.315588	0.316314	0.317135	0.317155	0.31641	0.315798	0.315882	0.316129	0.316221	0.316392	0.316466	0.316551	0.316966	0.317124	0.316899	0.316913	0.317044	0.316796	0.316175	0.315782	0.316072	0.316739	0.316957	0.316601	0.316517	0.316825	0.316984	0.317062	0.317414	0.317719	0.317453	0.316978	0.316942	0.317298	0.317473	0.317355	0.317392	0.317609	0.317938
1	0.320055	0.320148	0.320454	0.320779	0.320922	0.320851	0.320599	0.320033	0.319262	0.319021	0.31964	0.320556	0.321	0.320747	0.319888	0.319321	0.319771	0.320263	0.320516	0.320844	0.320746	0.320537	0.32094	0.321413	0.321232	0.320815	0.320732	0.320687	0.320273	0.319961	0.320349	0.320869	0.320448	0.319919	0.320624	0.321527	0.321556	0.321349	0.321338	0.321137	0.320825	0.32098	0.321465	0.321631	0.321421	0.321084	0.320786	0.320885	0.321221
1	0.316697	0.317392	0.317624	0.317505	0.317249	0.316923	0.316702	0.316325	0.315398	0.314831	0.315347	0.316174	0.31675	0.316968	0.316414	0.315864	0.316278	0.316743	0.316755	0.316716	0.316694	0.316973	0.317638	0.317875	0.317568	0.31757	0.317733	0.317386	0.316738	0.316665	0.317373	0.317692	0.31693	0.316267	0.316787	0.317779	0.318131	0.317897	0.317804	0.317885	0.317639	0.317357	0.317508	0.317656	0.317563	0.317591	0.317639	0.317544	0.317729
1	0.31545	0.315586	0.315529	0.315495	0.315792	0.316257	0.316258	0.315704	0.314958	0.314475	0.314655	0.315327	0.315802	0.315712	0.31533	0.315109	0.31506	0.314914	0.31502	0.315494	0.315615	0.315696	0.31643	0.316873	0.316476	0.315996	0.315908	0.315959	0.3157	0.31553	0.315982	0.316335	0.315706	0.314914	0.315037	0.315596	0.316077	0.316425	0.316634	0.316877	0.3168	0.316285	0.316213	0.316785	0.317203	0.317159	0.31688	0.316608	0.316695
1	0.306095	0.306107	0.305879	0.306051	0.306463	0.306638	0.306663	0.306523	0.305883	0.305255	0.305389	0.306179	0.30695	0.307128	0.306745	0.306327	0.306223	0.306058	0.306039	0.306611	0.307068	0.307189	0.307299	0.307218	0.307194	0.307316	0.30722	0.307052	0.306992	0.30702	0.307088	0.307155	0.307034	0.306764	0.306838	0.307335	0.307772	0.307748	0.30763	0.307862	0.308097	0.308063	0.307966	0.307905	0.307589	0.307197	0.307175	0.307351	0.307728
1	0.307192	0.307196	0.307293	0.307566	0.308038	0.308289	0.307979	0.307305	0.306604	0.306305	0.306673	0.307563	0.308301	0.308119	0.306902	0.305952	0.306347	0.307033	0.307203	0.307332	0.30754	0.307925	0.308429	0.308351	0.30792	0.307769	0.307833	0.307889	0.307802	0.307712	0.307759	0.307815	0.307498	0.307191	0.307488	0.308155	0.30887	0.309019	0.30863	0.308619	0.308754	0.308349	0.308002	0.30829	0.308493	0.308332	0.308356	0.308627	0.309039
1	0.327784	0.328328	0.328686	0.328207	0.327033	0.326656	0.327429	0.328303	0.328529	0.328191	0.327771	0.327575	0.32763	0.327574	0.327332	0.327304	0.327459	0.327743	0.327901	0.327291	0.326245	0.325802	0.326205	0.326564	0.326277	0.325881	0.325811	0.325878	0.326228	0.326815	0.327328	0.327613	0.327465	0.327015	0.326665	0.326721	0.326989	0.327172	0.327245	0.32741	0.327535	0.327175	0.326757	0.326978	0.327588	0.327843	0.327537	0.327134	0.32694
1	0.323314	0.323386	0.323333	0.322987	0.322006	0.321471	0.321866	0.322551	0.322949	0.322718	0.322237	0.322136	0.322427	0.322909	0.323151	0.322773	0.322512	0.322985	0.323348	0.322977	0.322284	0.321778	0.321775	0.321811	0.321428	0.321181	0.321095	0.320845	0.320934	0.321455	0.322087	0.322523	0.322663	0.322761	0.322771	0.322605	0.322541	0.322976	0.323602	0.323869	0.323291	0.321827	0.320826	0.321189	0.322097	0.322674	0.322663	0.322319	0.32231
1	0.319448	0.319702	0.319545	0.319338	0.318814	0.318247	0.318238	0.318568	0.318712	0.318636	0.318259	0.318006	0.318351	0.318758	0.318559	0.31794	0.317864	0.318594	0.319042	0.318603	0.317854	0.317254	0.317104	0.317238	0.316983	0.316481	0.316408	0.316763	0.317084	0.317241	0.317678	0.318265	0.318305	0.317697	0.317046	0.317135	0.31768	0.318021	0.318254	0.31858	0.318653	0.318058	0.317509	0.317943	0.318654	0.318741	0.318443	0.318101	0.317929
1	0.320653	0.321268	0.321054	0.320401	0.319479	0.318825	0.319015	0.319653	0.320066	0.320139	0.319967	0.319749	0.319659	0.319596	0.319524	0.319735	0.320119	0.32042	0.320743	0.320738	0.320334	0.319861	0.319443	0.319152	0.318795	0.318407	0.318308	0.318386	0.31869	0.319536	0.320585	0.320871	0.320307	0.319639	0.319166	0.319079	0.319321	0.319846	0.32088	0.321864	0.321626	0.320254	0.319238	0.319257	0.319638	0.319852	0.319941	0.31997	0.320056
1	0.336726	0.336859	0.336802	0.336301	0.335471	0.335066	0.335032	0.335243	0.335658	0.335912	0.335687	0.335351	0.335361	0.335479	0.335392	0.335469	0.336198	0.337151	0.337404	0.336606	0.33555	0.335021	0.335033	0.335107	0.334842	0.334462	0.334226	0.334127	0.334297	0.334766	0.335368	0.335869	0.336113	0.336101	0.335715	0.335208	0.335042	0.335313	0.335824	0.336438	0.336748	0.336199	0.335342	0.335009	0.335203	0.335802	0.336303	0.336026	0.335543
1	0.349944	0.350142	0.350156	0.350069	0.349353	0.348508	0.348437	0.348773	0.349002	0.348967	0.34871	0.348691	0.348897	0.349081	0.349316	0.349349	0.349114	0.349117	0.349576	0.349814	0.349173	0.348205	0.347762	0.34769	0.347455	0.34705	0.347092	0.347928	0.348651	0.348702	0.348955	0.349446	0.349548	0.349329	0.349093	0.34913	0.349369	0.349741	0.350025	0.349731	0.349016	0.348409	0.348293	0.348772	0.349369	0.34969	0.349607	0.349286	0.349112
1	0.322408	0.322799	0.322902	0.322488	0.321574	0.321018	0.321236	0.32185	0.32244	0.322558	0.322344	0.322321	0.322193	0.321804	0.321374	0.321039	0.321126	0.32172	0.322205	0.321797	0.320937	0.320635	0.321078	0.32143	0.321018	0.320381	0.320142	0.320277	0.32061	0.321092	0.321789	0.322163	0.321789	0.321224	0.321106	0.321524	0.321814	0.321851	0.322179	0.322748	0.322742	0.321778	0.32108	0.32163	0.32254	0.322631	0.32203	0.321526	0.321456
1	0.318663	0.318612	0.31852	0.318631	0.318233	0.317566	0.317333	0.317657	0.318134	0.318243	0.318151	0.318356	0.318728	0.318927	0.318766	0.318255	0.317933	0.318143	0.31827	0.317789	0.317223	0.316944	0.316882	0.316854	0.316579	0.316393	0.316557	0.31656	0.316348	0.316686	0.317814	0.318606	0.318439	0.318068	0.317784	0.317468	0.317552	0.318199	0.318593	0.318573	0.318425	0.317668	0.316843	0.317069	0.317966	0.318612	0.318619	0.318252	0.31792
1	0.33017	0.330565	0.330604	0.330098	0.329071	0.328608	0.328971	0.329378	0.329368	0.329305	0.329481	0.329432	0.329201	0.329294	0.329324	0.329171	0.329359	0.329939	0.330301	0.329834	0.32912	0.328835	0.328944	0.32898	0.328415	0.327757	0.32787	0.328571	0.329061	0.329131	0.329442	0.329907	0.32975	0.32951	0.329833	0.330216	0.330241	0.330137	0.330188	0.330331	0.329999	0.328956	0.328149	0.328423	0.329399	0.330378	0.330788	0.330513	0.330246
1	0.324334	0.324752	0.324926	0.324521	0.323832	0.323491	0.323753	0.324125	0.324111	0.324081	0.324416	0.32474	0.324374	0.323701	0.323474	0.323677	0.324132	0.324735	0.325093	0.324664	0.323811	0.32342	0.323848	0.324332	0.323951	0.323185	0.32294	0.323035	0.32297	0.323233	0.324094	0.324519	0.32426	0.324195	0.324404	0.324379	0.32418	0.324337	0.324723	0.324865	0.324646	0.323933	0.323405	0.323944	0.324721	0.325022	0.325117	0.325005	0.324728
1	0.315042	0.315255	0.315127	0.314707	0.313982	0.313854	0.314658	0.315626	0.316074	0.315828	0.315135	0.314748	0.314968	0.315294	0.315143	0.314732	0.3148	0.315448	0.315955	0.315463	0.314396	0.313737	0.313744	0.314062	0.314086	0.313597	0.313146	0.313273	0.313878	0.314744	0.315553	0.315618	0.315131	0.314915	0.314853	0.314812	0.314986	0.315378	0.315692	0.31589	0.315876	0.315031	0.314085	0.314369	0.315322	0.315792	0.315618	0.31506	0.314853
1	0.333601	0.333848	0.333885	0.33333	0.332196	0.331781	0.332631	0.333572	0.333918	0.333778	0.333213	0.332719	0.33256	0.332781	0.33298	0.33247	0.332029	0.332741	0.333774	0.333675	0.33263	0.331624	0.331377	0.331655	0.331486	0.331009	0.331091	0.331706	0.332242	0.332656	0.333365	0.333869	0.333566	0.333019	0.33257	0.332374	0.332859	0.33354	0.333785	0.333924	0.333836	0.333023	0.332052	0.331898	0.332406	0.332867	0.333036	0.332908	0.332735
1	0.317507	0.317764	0.31747	0.317242	0.317227	0.317561	0.317856	0.317687	0.317203	0.316545	0.316352	0.316829	0.31725	0.31747	0.317764	0.317864	0.3175	0.317089	0.317085	0.317262	0.317422	0.31765	0.317947	0.317893	0.31755	0.317336	0.317148	0.317292	0.317798	0.318139	0.318069	0.317862	0.317959	0.318054	0.317627	0.316969	0.316769	0.317171	0.317783	0.318215	0.318042	0.317399	0.317184	0.317839	0.318797	0.319078	0.318678	0.318614	0.318963
1	0.33438	0.334729	0.334282	0.334055	0.334376	0.334484	0.334224	0.334048	0.333786	0.333414	0.333442	0.333898	0.33422	0.334014	0.333708	0.333737	0.333776	0.333621	0.3338	0.334238	0.334105	0.333813	0.334249	0.334577	0.334232	0.333861	0.333772	0.333938	0.33397	0.333668	0.333491	0.333997	0.334873	0.335011	0.334527	0.334333	0.33452	0.334766	0.334776	0.334657	0.334377	0.333969	0.334082	0.334734	0.335453	0.335765	0.335288	0.334876	0.335371
1	0.325023	0.32501	0.324405	0.32416	0.324493	0.324808	0.324925	0.324794	0.324435	0.323922	0.323541	0.323793	0.324271	0.324072	0.323621	0.32381	0.324148	0.324212	0.324375	0.324628	0.324765	0.324658	0.324519	0.324239	0.323962	0.32418	0.324549	0.324767	0.324783	0.324552	0.324169	0.323951	0.324253	0.324795	0.324814	0.324285	0.324026	0.324291	0.32469	0.325105	0.325316	0.325167	0.325061	0.325342	0.326028	0.326449	0.325955	0.325318	0.325393
1	0.316976	0.317586	0.317186	0.316726	0.317042	0.317341	0.317015	0.316549	0.316037	0.315803	0.316277	0.316707	0.316637	0.316431	0.316375	0.316491	0.316358	0.315977	0.316154	0.316788	0.316967	0.316745	0.316885	0.317076	0.316882	0.316616	0.31662	0.316989	0.317184	0.316969	0.316828	0.316935	0.317143	0.317223	0.316922	0.316527	0.316522	0.316928	0.31733	0.317388	0.317028	0.316718	0.316903	0.317327	0.317881	0.318086	0.317635	0.317396	0.317749
1	0.322096	0.322623	0.322126	0.321542	0.321382	0.321267	0.321107	0.321272	0.321415	0.320891	0.320341	0.320677	0.321445	0.321832	0.321911	0.321797	0.321391	0.321127	0.321381	0.321605	0.321343	0.321227	0.321783	0.322097	0.321648	0.321163	0.321259	0.321427	0.320894	0.320595	0.321187	0.321585	0.321506	0.321566	0.321285	0.320469	0.320295	0.321031	0.321678	0.321824	0.321596	0.321413	0.321704	0.322281	0.322844	0.322937	0.322417	0.322101	0.322383
1	0.320011	0.320158	0.319918	0.319794	0.319765	0.319697	0.319783	0.31997	0.31975	0.319164	0.318957	0.319316	0.319397	0.319001	0.319116	0.319546	0.319346	0.31925	0.319799	0.320076	0.319976	0.319892	0.319989	0.320088	0.32002	0.319995	0.319946	0.319865	0.319863	0.319915	0.319796	0.31943	0.319196	0.319205	0.319238	0.319179	0.319333	0.319936	0.320257	0.319889	0.319417	0.31946	0.319826	0.320095	0.320552	0.320932	0.320715	0.320535	0.320919
1	0.327642	0.327677	0.326747	0.326191	0.326551	0.327167	0.32736	0.327124	0.326724	0.326466	0.326654	0.327007	0.326789	0.326132	0.326091	0.326573	0.326688	0.326676	0.327156	0.327789	0.327902	0.327557	0.327396	0.327408	0.327202	0.326905	0.32698	0.327304	0.327216	0.32693	0.326865	0.326879	0.327098	0.327382	0.327107	0.326282	0.32568	0.325834	0.326483	0.327108	0.327172	0.326703	0.326696	0.327533	0.328106	0.327855	0.327516	0.327612	0.328057
1	0.316487	0.316743	0.31636	0.316072	0.316111	0.31634	0.316378	0.31621	0.315823	0.315302	0.315039	0.315218	0.315822	0.316405	0.316594	0.316354	0.315775	0.315385	0.31567	0.316313	0.316576	0.316201	0.315871	0.315628	0.315314	0.315506	0.316026	0.316278	0.316027	0.315574	0.315526	0.315779	0.315817	0.315786	0.31578	0.315421	0.314868	0.31466	0.315078	0.315769	0.315986	0.315772	0.315499	0.315499	0.316263	0.31702	0.316717	0.316184	0.316448
1	0.320005	0.319692	0.318681	0.318372	0.318527	0.318452	0.318411	0.318582	0.318589	0.318449	0.318563	0.318814	0.318898	0.318813	0.318737	0.318826	0.318748	0.318384	0.318317	0.318719	0.319175	0.319227	0.319233	0.319324	0.319131	0.319022	0.319265	0.319404	0.319087	0.318728	0.318638	0.318798	0.319373	0.320004	0.320058	0.319551	0.318974	0.318706	0.318793	0.319188	0.319519	0.319621	0.3197	0.319668	0.319875	0.320394	0.320419	0.320139	0.320392
1	0.338259	0.338461	0.338256	0.338066	0.338282	0.338601	0.338454	0.337958	0.337524	0.337423	0.337865	0.338414	0.338312	0.337661	0.337375	0.337611	0.337725	0.337713	0.337929	0.338241	0.338295	0.338104	0.338058	0.3382	0.338557	0.338871	0.338774	0.33864	0.338406	0.337915	0.33782	0.338243	0.338635	0.33864	0.338108	0.337386	0.337167	0.337567	0.338285	0.338973	0.339074	0.338706	0.338327	0.338264	0.338918	0.339505	0.33919	0.338841	0.339151
1	0.322404	0.322983	0.323006	0.322895	0.323062	0.32342	0.323615	0.323423	0.322634	0.321756	0.321846	0.322579	0.322697	0.322233	0.322224	0.322535	0.322522	0.322387	0.322562	0.322943	0.32308	0.322799	0.322521	0.322396	0.322339	0.322448	0.322828	0.323341	0.323395	0.32293	0.322489	0.322292	0.322421	0.322779	0.322648	0.321956	0.321873	0.322664	0.323236	0.323304	0.323246	0.32312	0.323078	0.323275	0.323787	0.324182	0.324047	0.324017	0.324478
1	0.326651	0.326604	0.326447	0.326493	0.326616	0.326708	0.326615	0.326604	0.326642	0.326519	0.326495	0.326475	0.326089	0.325659	0.325831	0.326309	0.326235	0.32576	0.325828	0.326392	0.326772	0.326827	0.326952	0.327019	0.326492	0.325827	0.325846	0.326173	0.326223	0.326321	0.326573	0.326668	0.326535	0.326417	0.326286	0.325898	0.325557	0.325552	0.325692	0.325955	0.326122	0.326009	0.326032	0.326304	0.326776	0.32707	0.326774	0.326633	0.326991
1	0.339678	0.340413	0.340208	0.339675	0.339577	0.339916	0.339704	0.338982	0.338679	0.338717	0.338925	0.339428	0.339562	0.338986	0.338708	0.33899	0.338904	0.338443	0.338363	0.338695	0.339259	0.33986	0.340046	0.339661	0.339144	0.338952	0.3392	0.339744	0.339863	0.339491	0.339582	0.340155	0.340469	0.340108	0.339074	0.338098	0.337981	0.338593	0.339267	0.33966	0.339692	0.339581	0.339583	0.339656	0.340025	0.340524	0.340312	0.339848	0.340152
1	0.274232	0.274553	0.27517	0.275658	0.275715	0.275429	0.275174	0.275176	0.27503	0.274526	0.27408	0.274081	0.274019	0.273642	0.27387	0.274537	0.274806	0.274553	0.27409	0.273982	0.27405	0.273819	0.273635	0.274033	0.274865	0.275198	0.274562	0.27396	0.274117	0.274332	0.27392	0.273552	0.274144	0.274986	0.27515	0.275177	0.275435	0.275398	0.275109	0.274888	0.274611	0.274628	0.27517	0.27554	0.275672	0.276108	0.27666	0.276868	0.276644
1	0.275852	0.276307	0.277001	0.277307	0.276992	0.276594	0.276672	0.277047	0.276999	0.276352	0.275751	0.275698	0.27591	0.275957	0.276134	0.276559	0.27687	0.276894	0.276856	0.276864	0.276656	0.27624	0.275827	0.275958	0.276814	0.277469	0.277464	0.277182	0.277044	0.277182	0.277153	0.277155	0.277638	0.277884	0.277538	0.277352	0.277583	0.277755	0.277806	0.277834	0.277627	0.277404	0.277686	0.27816	0.278315	0.278622	0.279312	0.279633	0.279304
1	0.287965	0.288579	0.289719	0.290238	0.289708	0.289167	0.289532	0.2901	0.289691	0.288557	0.287939	0.288183	0.28843	0.288403	0.288782	0.289485	0.289914	0.289716	0.289221	0.289125	0.28926	0.289115	0.288736	0.288811	0.289621	0.290268	0.29004	0.289432	0.289312	0.28955	0.289225	0.28864	0.288897	0.289791	0.29025	0.290053	0.289875	0.289981	0.290342	0.290604	0.290078	0.289328	0.289534	0.29017	0.290492	0.291071	0.291599	0.291295	0.29078
1	0.282675	0.282903	0.283758	0.28434	0.284079	0.283642	0.283824	0.284305	0.284136	0.283246	0.282623	0.282713	0.282793	0.282492	0.282426	0.282716	0.283062	0.283236	0.283127	0.283033	0.2831	0.283092	0.283178	0.283782	0.284346	0.28411	0.283488	0.283212	0.283337	0.283333	0.282874	0.282786	0.283632	0.284437	0.284428	0.284138	0.284177	0.28425	0.284167	0.284152	0.284094	0.284121	0.284539	0.284864	0.284988	0.285467	0.285914	0.285696	0.285062
1	0.276299	0.277228	0.278505	0.278846	0.278163	0.277623	0.277763	0.27796	0.277531	0.276888	0.276856	0.277117	0.276966	0.276693	0.276904	0.277362	0.277763	0.277963	0.277988	0.27805	0.277859	0.277257	0.276747	0.277027	0.277822	0.278134	0.277691	0.277158	0.277478	0.278092	0.277775	0.277404	0.278133	0.278972	0.278876	0.27856	0.278644	0.278714	0.278657	0.278568	0.27819	0.277742	0.278053	0.279034	0.279856	0.280211	0.28014	0.279856	0.279664
1	0.282097	0.282604	0.283635	0.284155	0.283729	0.283235	0.283508	0.284075	0.284194	0.283598	0.282719	0.282525	0.282898	0.283155	0.283454	0.283726	0.283793	0.283515	0.283212	0.283336	0.283342	0.282893	0.282487	0.282853	0.283803	0.284306	0.28394	0.283229	0.283037	0.283285	0.283	0.282758	0.283685	0.284832	0.285089	0.284892	0.284852	0.284897	0.285102	0.285327	0.285012	0.284501	0.284635	0.285093	0.285239	0.285423	0.285679	0.285655	0.285538
1	0.276145	0.277347	0.278572	0.278699	0.277999	0.277749	0.278196	0.278455	0.277957	0.277102	0.2766	0.276705	0.277099	0.277256	0.277245	0.277292	0.277552	0.277693	0.277409	0.277227	0.277372	0.277539	0.277523	0.27783	0.278581	0.278607	0.277727	0.277385	0.277946	0.27828	0.277953	0.277739	0.278161	0.278786	0.279038	0.279122	0.279491	0.279818	0.279858	0.279687	0.27917	0.278678	0.278792	0.279232	0.279579	0.279938	0.280062	0.279856	0.279873
1	0.275742	0.276229	0.277618	0.278448	0.278148	0.277723	0.278037	0.278476	0.27817	0.277357	0.276812	0.276662	0.276627	0.276829	0.277223	0.277428	0.27769	0.277903	0.277789	0.277531	0.277193	0.276909	0.27682	0.277222	0.277884	0.278043	0.27767	0.277386	0.277672	0.278009	0.277455	0.27693	0.277698	0.278623	0.278434	0.27791	0.278135	0.278606	0.278616	0.27842	0.278174	0.277973	0.278261	0.278954	0.279554	0.279977	0.280122	0.279906	0.279683
1	0.282462	0.283064	0.284201	0.284746	0.284354	0.2839	0.284031	0.284384	0.284383	0.284047	0.283697	0.283257	0.282759	0.282639	0.283099	0.283727	0.284309	0.284526	0.284431	0.28456	0.284556	0.283974	0.283238	0.283202	0.283814	0.284139	0.283921	0.283707	0.283888	0.284121	0.283663	0.283117	0.283609	0.284319	0.284302	0.284083	0.284084	0.28425	0.284641	0.284804	0.284272	0.283682	0.283794	0.284308	0.284834	0.28549	0.285902	0.285821	0.285646
1	0.269519	0.270432	0.271462	0.271796	0.27132	0.270721	0.270589	0.270932	0.271091	0.270759	0.270414	0.270456	0.270672	0.270735	0.270788	0.270763	0.270771	0.270743	0.270729	0.270996	0.270836	0.270149	0.269959	0.270639	0.271338	0.27142	0.271139	0.270814	0.270664	0.270663	0.270515	0.270646	0.271528	0.272274	0.272155	0.271846	0.271947	0.272145	0.272296	0.272341	0.272009	0.271696	0.272103	0.272796	0.273023	0.273204	0.273438	0.273321	0.273136
1	0.263982	0.264763	0.26571	0.26587	0.265373	0.265175	0.265685	0.266078	0.265746	0.265105	0.264702	0.264571	0.264365	0.264289	0.264979	0.265681	0.26569	0.265573	0.265705	0.265866	0.26578	0.265313	0.264687	0.264757	0.265362	0.265423	0.26502	0.264853	0.264957	0.264946	0.264684	0.264585	0.265033	0.265615	0.265753	0.265774	0.266109	0.266285	0.266309	0.266487	0.266184	0.265616	0.265816	0.266427	0.266816	0.267214	0.26758	0.267524	0.267113
1	0.269691	0.269953	0.271065	0.271964	0.271772	0.271242	0.271285	0.271599	0.271322	0.270543	0.270076	0.269927	0.269644	0.269612	0.270181	0.270552	0.270716	0.270963	0.270875	0.270493	0.270093	0.269738	0.269635	0.270223	0.271256	0.271826	0.271492	0.270908	0.27103	0.27138	0.270798	0.270149	0.270763	0.271686	0.271922	0.272013	0.272171	0.272022	0.272069	0.272491	0.272255	0.271565	0.271768	0.272531	0.272966	0.273345	0.27365	0.273475	0.273011
1	0.279673	0.280287	0.281039	0.281689	0.281991	0.281847	0.281726	0.281805	0.281494	0.280599	0.279942	0.279936	0.279831	0.27956	0.279847	0.28029	0.28067	0.281073	0.281206	0.281085	0.280887	0.280566	0.280026	0.279945	0.280644	0.281224	0.281113	0.28083	0.281001	0.2813	0.280937	0.280421	0.280766	0.281594	0.281937	0.281759	0.28163	0.281586	0.281726	0.281964	0.281782	0.281606	0.281895	0.282102	0.282159	0.28247	0.282705	0.28254	0.282239
1	0.270614	0.271361	0.272157	0.27238	0.271947	0.271534	0.271591	0.271951	0.271648	0.270565	0.270136	0.270818	0.271399	0.271248	0.271156	0.271479	0.271846	0.271852	0.271739	0.271701	0.271261	0.270729	0.270849	0.271491	0.272	0.272067	0.271913	0.271659	0.271484	0.271785	0.271917	0.271634	0.271832	0.2723	0.27241	0.272424	0.272661	0.272854	0.272764	0.27254	0.272315	0.272264	0.272596	0.272923	0.273057	0.273376	0.27358	0.273501	0.273483
1	0.282239	0.282379	0.283298	0.284074	0.284282	0.284265	0.28435	0.284498	0.284188	0.283553	0.283372	0.283387	0.283123	0.28309	0.283645	0.284183	0.284458	0.284528	0.284366	0.284004	0.283632	0.283427	0.283172	0.283249	0.284002	0.284571	0.284435	0.284037	0.283634	0.283384	0.283233	0.283458	0.284342	0.284901	0.284592	0.284398	0.284882	0.285191	0.285128	0.285173	0.284828	0.284227	0.284547	0.285424	0.285881	0.286269	0.286727	0.286836	0.286547
1	0.272771	0.272945	0.273603	0.274135	0.274036	0.273895	0.274188	0.274356	0.273985	0.273295	0.27273	0.272524	0.272474	0.272649	0.273194	0.273515	0.273587	0.273659	0.273767	0.273895	0.273616	0.272962	0.272585	0.272942	0.27373	0.274306	0.274227	0.273643	0.273448	0.273721	0.273411	0.273128	0.273845	0.274425	0.274207	0.274107	0.274488	0.274802	0.274878	0.274725	0.274446	0.274446	0.274916	0.275393	0.275449	0.275586	0.276018	0.276267	0.276343
1	0.285043	0.285382	0.285999	0.286447	0.286118	0.285582	0.285735	0.28614	0.285878	0.285134	0.284749	0.284955	0.285222	0.285196	0.285228	0.285462	0.285985	0.286259	0.28601	0.285905	0.285866	0.285458	0.285018	0.285243	0.285934	0.286254	0.285955	0.285576	0.285716	0.286066	0.285765	0.285467	0.286235	0.287003	0.286724	0.286388	0.286812	0.287266	0.287267	0.28706	0.286584	0.286096	0.286411	0.287138	0.287441	0.287602	0.287823	0.287951	0.287873
1	0.263622	0.264106	0.265251	0.265902	0.265516	0.264956	0.264802	0.264965	0.264915	0.264396	0.263993	0.263908	0.263773	0.263743	0.264239	0.264856	0.265126	0.264883	0.26457	0.264676	0.264606	0.263996	0.263564	0.263942	0.264784	0.265202	0.264913	0.264652	0.264782	0.264565	0.263631	0.263232	0.264196	0.265241	0.265424	0.26539	0.265653	0.266038	0.266327	0.26637	0.266033	0.265684	0.26613	0.266956	0.267246	0.267229	0.267077	0.266642	0.266409
1	0.261652	0.261912	0.262608	0.263112	0.263307	0.26334	0.263437	0.263436	0.262917	0.262015	0.261325	0.261326	0.261813	0.262062	0.262135	0.262383	0.262797	0.263048	0.262985	0.262665	0.262072	0.261432	0.261215	0.261845	0.262943	0.263474	0.263013	0.262379	0.262519	0.263031	0.262872	0.262605	0.263052	0.263387	0.263285	0.263512	0.263943	0.263828	0.263601	0.263572	0.263174	0.263006	0.263862	0.26479	0.265037	0.26503	0.264829	0.264597	0.264561
1	0.262805	0.263131	0.264313	0.26528	0.265086	0.264396	0.264081	0.264096	0.263952	0.263445	0.263141	0.263393	0.263611	0.263664	0.263941	0.264112	0.264212	0.264407	0.264501	0.264304	0.263882	0.263492	0.263435	0.264083	0.264958	0.265173	0.264722	0.264372	0.264522	0.264762	0.264444	0.264012	0.264434	0.265193	0.265376	0.265373	0.265678	0.265807	0.26558	0.26545	0.265429	0.26545	0.265707	0.265867	0.265877	0.266083	0.266414	0.266657	0.266532
1	0.262356	0.26291	0.263851	0.264176	0.263698	0.263039	0.262888	0.263278	0.263248	0.262623	0.262316	0.262523	0.262694	0.262636	0.262766	0.263148	0.263609	0.263706	0.263352	0.263097	0.26289	0.262509	0.262447	0.263001	0.263746	0.264387	0.264564	0.264128	0.263742	0.263649	0.26327	0.263247	0.26443	0.265501	0.265245	0.2646	0.264572	0.264646	0.264497	0.264513	0.264542	0.264515	0.264835	0.265095	0.265195	0.265806	0.266531	0.266729	0.266472
1	0.266287	0.266863	0.26763	0.268172	0.268032	0.267619	0.267592	0.267596	0.267207	0.266703	0.266283	0.265973	0.265834	0.26592	0.266364	0.266921	0.267211	0.266991	0.266743	0.266885	0.266915	0.26657	0.266306	0.266641	0.267255	0.267335	0.266735	0.266183	0.266494	0.267326	0.267444	0.2672	0.267858	0.268564	0.267857	0.266934	0.267289	0.268041	0.268221	0.268016	0.2678	0.267792	0.268295	0.268958	0.269237	0.269506	0.2699	0.269853	0.269261
1	0.283487	0.284421	0.285502	0.285775	0.285311	0.284956	0.285139	0.285215	0.284682	0.284039	0.283953	0.284522	0.284962	0.284584	0.284058	0.284121	0.284752	0.285176	0.284979	0.284529	0.284121	0.283767	0.283485	0.284111	0.285569	0.286232	0.285682	0.285079	0.285188	0.285462	0.285005	0.284547	0.285264	0.286183	0.286081	0.285832	0.28633	0.286816	0.286557	0.286036	0.285671	0.285612	0.286232	0.286849	0.286889	0.286839	0.286799	0.286676	0.286564
1	0.260569	0.261144	0.262024	0.262478	0.262089	0.261522	0.261612	0.262032	0.26187	0.26118	0.260906	0.261207	0.261341	0.261164	0.261426	0.261717	0.26172	0.262055	0.262452	0.262371	0.261807	0.260943	0.2603	0.26066	0.261678	0.262023	0.261551	0.261317	0.2617	0.261998	0.261445	0.261004	0.261778	0.262538	0.262366	0.262204	0.262555	0.262674	0.262558	0.262814	0.262856	0.262446	0.262554	0.263145	0.26349	0.263708	0.263871	0.263751	0.263541
1	0.281023	0.281548	0.282414	0.282752	0.282368	0.282117	0.282321	0.28249	0.282021	0.281105	0.280625	0.280825	0.28122	0.281353	0.281367	0.281368	0.281625	0.282009	0.281993	0.28174	0.281524	0.281241	0.280991	0.281292	0.282067	0.282537	0.282206	0.281618	0.281602	0.281965	0.281923	0.281882	0.282487	0.282928	0.282573	0.282211	0.282556	0.282996	0.283199	0.28342	0.283354	0.283093	0.283284	0.283612	0.283627	0.283902	0.284346	0.284301	0.284099
1	0.273214	0.273501	0.274407	0.275076	0.275081	0.274986	0.275096	0.275194	0.27487	0.273951	0.273306	0.273389	0.273325	0.273111	0.273588	0.274295	0.274735	0.274716	0.274481	0.274502	0.274332	0.273843	0.273637	0.274255	0.275028	0.275031	0.274823	0.27501	0.275167	0.274956	0.27454	0.274574	0.275343	0.275853	0.275619	0.275403	0.27564	0.275962	0.27615	0.276183	0.275856	0.275706	0.276117	0.276199	0.276004	0.276333	0.276665	0.276493	0.276354
1	0.274367	0.274956	0.276098	0.276964	0.276842	0.276222	0.27605	0.276156	0.27599	0.275634	0.275523	0.275699	0.275791	0.275737	0.275852	0.27585	0.275773	0.276021	0.276481	0.276627	0.276119	0.275563	0.275716	0.276324	0.276716	0.276706	0.276279	0.275881	0.27616	0.276741	0.276601	0.276209	0.276888	0.277997	0.277972	0.277361	0.277471	0.277912	0.278016	0.277717	0.277111	0.276656	0.276986	0.277706	0.278134	0.278456	0.278575	0.278342	0.278057
1	0.279246	0.279605	0.279833	0.27992	0.279929	0.279858	0.279731	0.279762	0.279636	0.279136	0.278827	0.279036	0.27931	0.279343	0.279511	0.279694	0.279974	0.280291	0.280228	0.280194	0.28024	0.279804	0.279151	0.279095	0.279594	0.279989	0.27984	0.279439	0.279533	0.279982	0.279948	0.27982	0.280502	0.281396	0.281593	0.281446	0.281551	0.281667	0.281481	0.281096	0.280576	0.280252	0.280722	0.28145	0.281773	0.282331	0.283115	0.283246	0.282664
1	0.273963	0.274353	0.275353	0.276003	0.275718	0.275291	0.275258	0.275307	0.275051	0.2744	0.273936	0.274002	0.274223	0.274297	0.274407	0.27463	0.274987	0.275281	0.275335	0.275321	0.275229	0.274882	0.274295	0.274208	0.274955	0.275587	0.275463	0.274908	0.27454	0.274617	0.274563	0.274585	0.275515	0.276458	0.27635	0.275867	0.27591	0.276247	0.276509	0.276634	0.276216	0.275655	0.275967	0.276626	0.27696	0.277384	0.277633	0.277253	0.276962
1	0.278423	0.279112	0.280252	0.28092	0.280891	0.280477	0.280136	0.280299	0.28044	0.279941	0.279438	0.279365	0.279253	0.279028	0.279192	0.279622	0.280074	0.280286	0.280281	0.280099	0.279645	0.279344	0.279287	0.279578	0.280062	0.280171	0.27985	0.279529	0.279827	0.280411	0.280272	0.280057	0.280651	0.280923	0.280385	0.280313	0.280839	0.280965	0.28086	0.28097	0.28087	0.280579	0.280651	0.280826	0.280926	0.281403	0.281894	0.281847	0.281668
1	0.275035	0.275179	0.275967	0.276654	0.276357	0.27573	0.275676	0.275944	0.275873	0.275438	0.27504	0.275039	0.275349	0.275519	0.275575	0.275641	0.275802	0.275789	0.275618	0.275607	0.275427	0.275041	0.274868	0.275331	0.276227	0.276547	0.276012	0.275424	0.275444	0.275683	0.275332	0.275202	0.27606	0.276712	0.276388	0.275925	0.27618	0.276632	0.276659	0.276434	0.276007	0.275821	0.276388	0.276988	0.277208	0.277649	0.27816	0.278071	0.277615
1	0.286212	0.28714	0.288436	0.288692	0.287929	0.287441	0.287766	0.288224	0.288077	0.287326	0.286734	0.286781	0.2867	0.286243	0.286511	0.2872	0.287396	0.287251	0.287259	0.287469	0.287351	0.286898	0.286562	0.286696	0.287456	0.287996	0.287541	0.286848	0.286752	0.287034	0.286869	0.286774	0.287799	0.288612	0.288223	0.28802	0.288668	0.289241	0.289339	0.289275	0.289003	0.288428	0.288204	0.288626	0.289076	0.289361	0.289513	0.289545	0.289491
1	0.273593	0.274147	0.275232	0.275782	0.275323	0.274843	0.275115	0.275636	0.275525	0.27484	0.274318	0.274255	0.274234	0.274031	0.274099	0.274317	0.2747	0.275179	0.275189	0.274834	0.274514	0.274308	0.274269	0.274699	0.275348	0.275509	0.275127	0.274593	0.274248	0.274262	0.274226	0.274351	0.275143	0.275799	0.27574	0.275496	0.275578	0.275859	0.276272	0.276651	0.276434	0.276018	0.276112	0.276415	0.276657	0.277004	0.277291	0.277306	0.277072
1	0.272507	0.27321	0.274346	0.274895	0.274616	0.274205	0.274164	0.274324	0.274207	0.273719	0.273082	0.272606	0.272473	0.272729	0.273294	0.273627	0.273979	0.27451	0.274601	0.27432	0.273966	0.273482	0.273125	0.273276	0.273763	0.274161	0.27423	0.274168	0.274283	0.27444	0.27406	0.273579	0.274224	0.275335	0.275411	0.274929	0.274882	0.274962	0.274939	0.275002	0.274982	0.274922	0.275501	0.276392	0.276698	0.276657	0.276416	0.276058	0.275966
1	0.271906	0.272091	0.272714	0.273276	0.273254	0.272903	0.272719	0.272795	0.272677	0.272283	0.272115	0.272382	0.272778	0.272737	0.27254	0.272719	0.273144	0.273228	0.272769	0.272294	0.272157	0.272139	0.271915	0.272077	0.273025	0.273571	0.273074	0.27257	0.272771	0.273035	0.272636	0.272517	0.2735	0.274348	0.274197	0.273979	0.274188	0.274104	0.273823	0.273799	0.273559	0.273224	0.273607	0.27441	0.274956	0.275281	0.275495	0.275528	0.275388
1	0.272249	0.272821	0.274075	0.274693	0.274161	0.273695	0.27388	0.273892	0.273421	0.272947	0.272899	0.273188	0.273155	0.272815	0.272835	0.272918	0.273017	0.273486	0.273943	0.273865	0.273391	0.272908	0.272588	0.272948	0.273816	0.274238	0.274036	0.273911	0.2742	0.274226	0.273518	0.273025	0.273685	0.274701	0.275004	0.275007	0.275296	0.27542	0.275179	0.274783	0.274216	0.273919	0.27447	0.275363	0.275734	0.27564	0.275447	0.275326	0.275395
1	0.274296	0.27512	0.276311	0.276733	0.276197	0.275718	0.275926	0.276193	0.275726	0.274866	0.274577	0.275006	0.275238	0.274866	0.27471	0.274842	0.274975	0.275182	0.27542	0.275554	0.275322	0.274732	0.274232	0.27431	0.274964	0.275476	0.275146	0.274623	0.274723	0.274894	0.27448	0.274167	0.274768	0.275556	0.275627	0.275525	0.275936	0.276228	0.276103	0.276014	0.275756	0.275381	0.275555	0.276048	0.276467	0.277092	0.277548	0.277321	0.276887
1	0.289365	0.289865	0.290625	0.291175	0.290935	0.290297	0.290415	0.291095	0.291088	0.290345	0.289793	0.28974	0.28986	0.289778	0.289686	0.289902	0.290413	0.290778	0.290837	0.290738	0.290343	0.289827	0.289562	0.289724	0.290249	0.290675	0.290557	0.290231	0.290367	0.29077	0.290651	0.290656	0.291717	0.292484	0.291737	0.290884	0.291211	0.291703	0.291579	0.291434	0.291418	0.291311	0.291523	0.292023	0.292551	0.29327	0.293446	0.292753	0.292219
1	0.27234	0.27269	0.27349	0.274076	0.273886	0.273389	0.273442	0.273634	0.273188	0.272401	0.272003	0.272153	0.272147	0.271947	0.272307	0.272864	0.273315	0.273527	0.273251	0.273071	0.273107	0.272792	0.272327	0.272508	0.273221	0.273486	0.273026	0.272488	0.272507	0.272841	0.272665	0.272573	0.273264	0.273789	0.273792	0.273903	0.274173	0.274245	0.274104	0.274023	0.274087	0.274108	0.274358	0.274785	0.274885	0.275083	0.275589	0.275835	0.275599
1	0.27345	0.274039	0.274802	0.275438	0.275845	0.275711	0.275359	0.2754	0.275368	0.274732	0.274198	0.27431	0.274384	0.274268	0.274578	0.274809	0.274817	0.275034	0.275247	0.275263	0.275125	0.274921	0.274738	0.274869	0.275477	0.276092	0.275996	0.275447	0.275434	0.275613	0.275027	0.274864	0.276148	0.277179	0.276824	0.27639	0.276812	0.277114	0.276885	0.276695	0.276299	0.275802	0.276107	0.276804	0.27702	0.277318	0.277789	0.277661	0.277292
2	0.316224	0.316071	0.315762	0.315391	0.315056	0.315143	0.316005	0.316742	0.31641	0.31613	0.316649	0.316874	0.316542	0.316508	0.316754	0.316799	0.316778	0.316769	0.316598	0.316204	0.315889	0.316022	0.316248	0.315973	0.315661	0.31574	0.316034	0.316447	0.316704	0.316714	0.316461	0.316389	0.316777	0.31699	0.316926	0.317015	0.317271	0.317495	0.317705	0.318132	0.318582	0.318559	0.318345	0.318246	0.318102	0.317973	0.317773	0.317473	0.317463
2	0.332261	0.332297	0.33216	0.332029	0.331725	0.331499	0.33185	0.332276	0.332339	0.332195	0.332241	0.332539	0.3328	0.332982	0.332773	0.332136	0.331701	0.331654	0.331887	0.33214	0.332162	0.332073	0.331943	0.33164	0.3314	0.331586	0.331893	0.331877	0.331814	0.331804	0.331283	0.331024	0.331852	0.332561	0.332625	0.332844	0.33341	0.333863	0.333812	0.333671	0.33389	0.334225	0.334506	0.334402	0.333966	0.333716	0.333561	0.33343	0.333362
2	0.336663	0.336723	0.335997	0.335321	0.335006	0.334901	0.33522	0.335814	0.33597	0.335514	0.335162	0.335127	0.335152	0.335447	0.335832	0.335813	0.335569	0.335755	0.336401	0.336703	0.336428	0.336124	0.336038	0.335781	0.335344	0.335117	0.33503	0.334975	0.335338	0.33593	0.336088	0.336292	0.33677	0.33688	0.336525	0.336363	0.336869	0.33744	0.337505	0.337504	0.337724	0.337783	0.33782	0.338034	0.338047	0.337759	0.33724	0.336768	0.336913
2	0.313916	0.314132	0.313885	0.313587	0.313268	0.312778	0.312815	0.313135	0.313067	0.313007	0.313452	0.313714	0.313299	0.313146	0.313441	0.313526	0.313429	0.313371	0.313537	0.313798	0.31378	0.313491	0.31312	0.312664	0.312335	0.312457	0.312841	0.313057	0.313162	0.313196	0.312908	0.312957	0.313658	0.313979	0.313557	0.313256	0.313608	0.314209	0.314596	0.314804	0.31484	0.314736	0.314823	0.314865	0.314711	0.314566	0.31412	0.313814	0.314113
2	0.326125	0.326184	0.326082	0.326151	0.326142	0.325867	0.326091	0.326619	0.326537	0.32617	0.326253	0.326311	0.325968	0.325777	0.325624	0.325242	0.32519	0.325765	0.326458	0.326604	0.326262	0.325921	0.325843	0.325735	0.325363	0.325214	0.32567	0.326247	0.326434	0.326218	0.32573	0.32577	0.326498	0.326795	0.326485	0.326441	0.326646	0.326628	0.326793	0.327501	0.328091	0.327884	0.327555	0.327523	0.327272	0.326842	0.326445	0.326302	0.326441
2	0.32636	0.327024	0.327091	0.326569	0.325896	0.325765	0.326343	0.326653	0.326441	0.326374	0.326564	0.326556	0.326316	0.326302	0.326167	0.325672	0.325431	0.325554	0.325968	0.326365	0.326339	0.326378	0.326548	0.32624	0.325691	0.325439	0.325637	0.325821	0.325705	0.325691	0.325745	0.326165	0.326985	0.327209	0.326605	0.326071	0.326311	0.326795	0.326889	0.327128	0.3278	0.3283	0.328494	0.328613	0.328633	0.328376	0.327672	0.327081	0.327104
2	0.329407	0.329649	0.329657	0.329515	0.329355	0.329123	0.3293	0.329758	0.329701	0.329218	0.329252	0.329704	0.329842	0.329905	0.329965	0.329798	0.329616	0.329442	0.329182	0.329016	0.329261	0.329805	0.33002	0.329481	0.32886	0.328915	0.329295	0.329392	0.329157	0.32881	0.328537	0.329011	0.330006	0.330264	0.329959	0.330116	0.3307	0.330902	0.330637	0.33073	0.331109	0.331138	0.331198	0.331193	0.330797	0.330589	0.330603	0.330699	0.330974
2	0.327279	0.327814	0.327779	0.327524	0.327344	0.327278	0.327818	0.328253	0.327777	0.327291	0.327429	0.327691	0.327787	0.327899	0.327841	0.327532	0.327319	0.32737	0.327587	0.327703	0.327693	0.327511	0.327262	0.327105	0.326984	0.326916	0.327059	0.327261	0.327159	0.327035	0.32704	0.327264	0.327767	0.328049	0.327997	0.328086	0.328395	0.328626	0.328712	0.328975	0.32958	0.329934	0.329828	0.329596	0.329389	0.329065	0.328635	0.32881	0.329427
2	0.330974	0.331341	0.331303	0.331218	0.331131	0.33086	0.330972	0.331349	0.33142	0.331397	0.331571	0.331649	0.331479	0.331343	0.33114	0.3309	0.330909	0.331072	0.33136	0.331515	0.33121	0.330653	0.330216	0.33005	0.330132	0.330669	0.331604	0.331932	0.331651	0.331774	0.331936	0.33166	0.331367	0.331226	0.331124	0.331235	0.331715	0.332274	0.332603	0.332865	0.333096	0.333086	0.333192	0.333462	0.333415	0.333026	0.3325	0.332221	0.332471
2	0.315586	0.315828	0.315681	0.315355	0.315198	0.315052	0.315268	0.315824	0.315968	0.315766	0.315742	0.315775	0.315769	0.316041	0.316327	0.315943	0.315301	0.315237	0.315717	0.316313	0.316591	0.316424	0.316215	0.316006	0.315749	0.315617	0.315634	0.315875	0.316137	0.315955	0.315443	0.315552	0.316168	0.316257	0.316252	0.316816	0.317383	0.317438	0.317352	0.317556	0.317791	0.318028	0.318385	0.318182	0.31756	0.317367	0.317373	0.317414	0.317532
2	0.327301	0.327144	0.326631	0.326006	0.325709	0.325839	0.326408	0.326909	0.326776	0.326303	0.326204	0.326346	0.326395	0.326584	0.326519	0.326034	0.326036	0.326492	0.326673	0.32668	0.326871	0.327152	0.327214	0.326804	0.326389	0.326582	0.32699	0.327072	0.327109	0.327326	0.327511	0.32793	0.328332	0.328094	0.327546	0.327352	0.327683	0.328025	0.328051	0.328254	0.32885	0.329209	0.329115	0.328979	0.329028	0.328992	0.328525	0.328171	0.328293
2	0.338036	0.3383	0.337814	0.337112	0.336675	0.336647	0.337384	0.337763	0.33699	0.336423	0.336692	0.337037	0.337103	0.33729	0.337578	0.337513	0.337294	0.337241	0.33735	0.337461	0.33738	0.337215	0.337314	0.337467	0.337258	0.336898	0.336808	0.336768	0.336847	0.337308	0.337383	0.337194	0.3374	0.337661	0.337705	0.337656	0.337813	0.338245	0.338502	0.338704	0.33919	0.339552	0.339622	0.339349	0.338868	0.338535	0.338269	0.338289	0.338599
2	0.344929	0.345149	0.344641	0.344095	0.343845	0.343688	0.344022	0.344567	0.344767	0.344778	0.344547	0.343829	0.343372	0.343789	0.344136	0.344024	0.344196	0.344567	0.344787	0.345029	0.345244	0.345182	0.344935	0.344462	0.343813	0.343588	0.34408	0.344343	0.343834	0.343599	0.343759	0.343908	0.344409	0.345019	0.345047	0.344794	0.345008	0.345412	0.345623	0.346005	0.346512	0.34676	0.346745	0.346311	0.345846	0.346003	0.346172	0.345937	0.345865
2	0.325275	0.325435	0.325311	0.32505	0.324671	0.32418	0.324285	0.324776	0.324737	0.324557	0.324885	0.325267	0.325336	0.32523	0.324865	0.324292	0.324043	0.32427	0.324637	0.324866	0.324859	0.324736	0.324577	0.32428	0.324125	0.324367	0.324682	0.324707	0.324456	0.324112	0.323821	0.324043	0.324672	0.325084	0.32504	0.324989	0.32545	0.325962	0.326144	0.326415	0.326805	0.326859	0.326864	0.326873	0.326557	0.326232	0.325957	0.32583	0.325962
2	0.325699	0.325763	0.325103	0.324429	0.324445	0.324958	0.325497	0.325574	0.325074	0.324657	0.324876	0.325238	0.325502	0.32571	0.325415	0.32512	0.325404	0.325768	0.325979	0.325848	0.325513	0.325486	0.325407	0.324988	0.324769	0.325005	0.325309	0.325299	0.325293	0.325453	0.32522	0.325026	0.325464	0.32579	0.325618	0.325597	0.325833	0.32596	0.326172	0.326654	0.327151	0.327673	0.328133	0.327783	0.327032	0.326791	0.326459	0.325909	0.325892
2	0.337219	0.337344	0.337658	0.337666	0.337176	0.336752	0.336829	0.337263	0.337312	0.336766	0.336336	0.336252	0.336409	0.336756	0.336997	0.337024	0.336928	0.336684	0.336886	0.337604	0.337951	0.337703	0.337058	0.336514	0.336566	0.336704	0.336384	0.336073	0.336375	0.336838	0.336612	0.336474	0.337439	0.338518	0.338604	0.338286	0.338387	0.33852	0.338282	0.338026	0.337865	0.337876	0.338308	0.338629	0.338437	0.338377	0.338714	0.338988	0.339095
2	0.348921	0.349737	0.350662	0.350946	0.350496	0.350211	0.350632	0.350985	0.35053	0.349586	0.348938	0.348849	0.3488	0.348524	0.348586	0.349097	0.349513	0.349537	0.349493	0.349614	0.349676	0.349338	0.348702	0.348849	0.349842	0.350567	0.350624	0.350173	0.349793	0.34977	0.349473	0.349221	0.3499	0.350622	0.35032	0.349915	0.350258	0.350519	0.350561	0.350879	0.350941	0.350726	0.35092	0.351286	0.351252	0.35123	0.351481	0.351522	0.351415
2	0.325781	0.326079	0.327076	0.327694	0.327688	0.327522	0.327338	0.327275	0.327125	0.326626	0.326357	0.326437	0.326215	0.326003	0.326322	0.326554	0.326521	0.326435	0.326575	0.326971	0.326873	0.326259	0.326045	0.326608	0.327386	0.327881	0.327903	0.327567	0.327409	0.327374	0.326864	0.326478	0.327126	0.328	0.327971	0.327426	0.327207	0.327322	0.327505	0.327614	0.327425	0.327255	0.32774	0.328429	0.328744	0.329016	0.329328	0.329395	0.329209
2	0.337713	0.33813	0.338838	0.339306	0.339239	0.339203	0.339328	0.339289	0.338917	0.338311	0.337977	0.338155	0.338082	0.337556	0.337568	0.338036	0.338493	0.338977	0.339229	0.339051	0.338688	0.338172	0.337617	0.337752	0.33859	0.339173	0.339039	0.338801	0.338945	0.339116	0.338841	0.338767	0.339608	0.340299	0.340029	0.339614	0.339702	0.339987	0.340096	0.340026	0.339546	0.338968	0.339495	0.340707	0.341423	0.341679	0.341455	0.340748	0.340289
2	0.343301	0.343554	0.344652	0.345446	0.345221	0.345046	0.345357	0.345311	0.344724	0.344292	0.34437	0.344512	0.344303	0.34417	0.344388	0.344361	0.344324	0.344689	0.344997	0.344988	0.344779	0.344328	0.343825	0.344113	0.345001	0.345307	0.3448	0.344253	0.344544	0.345277	0.345237	0.34488	0.345218	0.345712	0.345757	0.345841	0.346208	0.346239	0.346071	0.346138	0.345937	0.345584	0.345878	0.346549	0.347112	0.347594	0.347565	0.347053	0.346884
2	0.326897	0.327002	0.327911	0.328755	0.328725	0.328474	0.32864	0.328866	0.328535	0.327829	0.327435	0.32733	0.32732	0.32765	0.328116	0.328274	0.328494	0.328665	0.328479	0.328415	0.328318	0.327637	0.326953	0.327328	0.328381	0.328844	0.328456	0.32786	0.32772	0.328049	0.328089	0.328012	0.328585	0.329171	0.329119	0.329162	0.32956	0.329525	0.329323	0.329421	0.329006	0.328426	0.328883	0.329635	0.329875	0.330279	0.3308	0.330828	0.330511
2	0.323173	0.323728	0.325199	0.325906	0.324996	0.324076	0.324265	0.324835	0.324864	0.324164	0.323512	0.323615	0.323884	0.32376	0.323729	0.323914	0.324179	0.324339	0.324338	0.324567	0.324743	0.324412	0.324085	0.324313	0.324856	0.325206	0.325017	0.324633	0.324682	0.324903	0.324675	0.324361	0.324672	0.325285	0.325557	0.325652	0.325815	0.325829	0.325829	0.326057	0.325906	0.32535	0.325438	0.325942	0.326294	0.326606	0.326456	0.326103	0.326286
2	0.335192	0.335532	0.336127	0.336555	0.336555	0.336428	0.336712	0.337273	0.337219	0.336325	0.335441	0.335029	0.334842	0.334768	0.335147	0.335912	0.336628	0.336877	0.336665	0.336303	0.335711	0.334981	0.334726	0.335418	0.336442	0.336693	0.336305	0.336139	0.336212	0.336039	0.335523	0.3355	0.336471	0.337298	0.337415	0.337603	0.33799	0.338082	0.338014	0.337998	0.337721	0.337156	0.336838	0.33692	0.337294	0.337887	0.338105	0.337906	0.33792
2	0.334821	0.335706	0.336624	0.336865	0.336607	0.336375	0.336401	0.336476	0.336234	0.335765	0.335577	0.33556	0.335285	0.33509	0.335327	0.335564	0.335853	0.336296	0.336429	0.336144	0.335627	0.335116	0.334862	0.335142	0.335678	0.336038	0.336258	0.33633	0.336456	0.336597	0.336166	0.335625	0.335931	0.336682	0.336991	0.336999	0.337199	0.337218	0.336977	0.337001	0.336915	0.336635	0.336875	0.337369	0.337777	0.338392	0.338836	0.338903	0.338962
2	0.317816	0.318152	0.319045	0.319592	0.319064	0.318284	0.31838	0.319211	0.319661	0.319179	0.318592	0.318464	0.318375	0.318001	0.317754	0.318066	0.318695	0.31894	0.318788	0.31887	0.318833	0.318234	0.317778	0.318099	0.319075	0.319851	0.319459	0.318599	0.31858	0.318762	0.318136	0.317813	0.318706	0.319407	0.319162	0.319155	0.319817	0.320098	0.319839	0.319804	0.319715	0.319569	0.319976	0.320583	0.320928	0.32109	0.321161	0.321109	0.3209
2	0.326292	0.32686	0.32756	0.327844	0.327619	0.327257	0.32728	0.327775	0.327923	0.327258	0.326577	0.326281	0.325873	0.32551	0.325782	0.32629	0.326602	0.32672	0.326767	0.326816	0.326543	0.325914	0.325595	0.326112	0.326932	0.327326	0.327183	0.326766	0.326847	0.327315	0.32682	0.325949	0.326365	0.327302	0.327506	0.327503	0.327717	0.327933	0.328229	0.328315	0.327801	0.327224	0.327635	0.328516	0.328557	0.32831	0.328515	0.328682	0.32847
2	0.335747	0.336629	0.337412	0.337469	0.336947	0.336761	0.337274	0.337636	0.337182	0.336335	0.335725	0.335618	0.335868	0.336069	0.336234	0.336361	0.336493	0.336641	0.336541	0.336251	0.335999	0.335696	0.335438	0.335761	0.336482	0.336749	0.336447	0.336173	0.336356	0.336699	0.336442	0.336213	0.336925	0.337444	0.337186	0.337238	0.33762	0.337659	0.337537	0.337442	0.337261	0.337246	0.337805	0.338371	0.338381	0.338426	0.338564	0.33831	0.337929
2	0.34241	0.343222	0.34432	0.344619	0.343959	0.34325	0.343225	0.343636	0.343475	0.34268	0.3422	0.342193	0.34212	0.341936	0.34188	0.34191	0.342608	0.343562	0.343605	0.343286	0.343146	0.343019	0.343059	0.343474	0.344059	0.344287	0.34389	0.343274	0.343208	0.343353	0.34271	0.342058	0.342542	0.343392	0.343678	0.343768	0.344149	0.344474	0.344447	0.344457	0.344423	0.344065	0.344133	0.344639	0.344927	0.345377	0.345955	0.346127	0.345824
2	0.321727	0.322471	0.32334	0.323612	0.323248	0.322753	0.322834	0.323481	0.32381	0.323447	0.32278	0.322339	0.322194	0.322123	0.322268	0.322437	0.322569	0.322608	0.322543	0.322745	0.322885	0.322596	0.322289	0.322471	0.322894	0.323127	0.323069	0.322811	0.322814	0.322825	0.322275	0.32209	0.323083	0.323928	0.323538	0.322949	0.323062	0.323576	0.324096	0.324216	0.323763	0.323445	0.323817	0.324305	0.324523	0.324914	0.325317	0.325153	0.324781
2	0.323349	0.323946	0.324752	0.325136	0.324784	0.324108	0.324114	0.324739	0.324667	0.323852	0.323458	0.323766	0.324029	0.323771	0.323571	0.323799	0.324422	0.324877	0.32482	0.324598	0.324145	0.323512	0.323186	0.323574	0.324347	0.324806	0.324739	0.32448	0.324369	0.324173	0.323666	0.323615	0.324446	0.325194	0.325341	0.325401	0.325535	0.325345	0.325266	0.325572	0.325292	0.324581	0.324846	0.325808	0.326181	0.326359	0.3269	0.327179	0.327065
2	0.346026	0.345966	0.346524	0.347239	0.347389	0.34697	0.346755	0.347157	0.347258	0.346712	0.346212	0.346086	0.346253	0.346576	0.347189	0.347744	0.347779	0.347345	0.346842	0.346732	0.346549	0.345864	0.345522	0.346381	0.347563	0.347677	0.347011	0.346545	0.346607	0.34693	0.347045	0.347258	0.347901	0.348214	0.347946	0.347779	0.347918	0.348073	0.348019	0.348008	0.348063	0.347949	0.348122	0.348517	0.34885	0.349408	0.349816	0.349606	0.348978
2	0.332028	0.332285	0.332748	0.333048	0.332795	0.33221	0.331981	0.332337	0.332473	0.33188	0.3312	0.331144	0.331503	0.33175	0.332126	0.332738	0.333259	0.333389	0.333099	0.332582	0.331966	0.331552	0.331608	0.33209	0.3326	0.332769	0.332653	0.332577	0.332799	0.333145	0.333078	0.33289	0.333266	0.333735	0.333699	0.333638	0.333933	0.333986	0.333526	0.333198	0.333152	0.333186	0.333731	0.334631	0.335399	0.335906	0.335723	0.335071	0.334698
2	0.315015	0.315557	0.316642	0.317481	0.317598	0.317333	0.317027	0.316709	0.316127	0.315533	0.315405	0.31549	0.315446	0.315619	0.316239	0.31662	0.316583	0.316403	0.31645	0.316817	0.316792	0.316148	0.315698	0.316341	0.317425	0.317614	0.316857	0.316149	0.316337	0.316771	0.316362	0.316009	0.316711	0.317476	0.317479	0.31724	0.317319	0.317527	0.317931	0.318599	0.318437	0.317193	0.316643	0.317383	0.318381	0.319202	0.319275	0.318552	0.318079
2	0.290179	0.290898	0.291583	0.291772	0.291282	0.290636	0.290692	0.291191	0.29101	0.290266	0.289984	0.290204	0.290173	0.289847	0.289856	0.290227	0.290805	0.291218	0.291112	0.290704	0.290208	0.289863	0.289859	0.290257	0.290707	0.290691	0.290269	0.290047	0.290399	0.290876	0.290712	0.290356	0.290873	0.291615	0.291571	0.291327	0.291636	0.292083	0.292188	0.291923	0.291456	0.29146	0.292189	0.292806	0.292855	0.292919	0.293076	0.292948	0.292638
2	0.320069	0.320552	0.321424	0.321737	0.321194	0.320895	0.321444	0.321858	0.321241	0.320169	0.319617	0.3198	0.320153	0.32008	0.320146	0.320962	0.321902	0.322172	0.321897	0.321466	0.320955	0.320363	0.320018	0.320373	0.3211	0.321361	0.320983	0.320519	0.320496	0.320749	0.320598	0.320599	0.321436	0.322261	0.322431	0.322364	0.322509	0.322451	0.322163	0.32218	0.322219	0.321998	0.322003	0.322336	0.32269	0.322996	0.323	0.322882	0.323135
2	0.331223	0.331924	0.332538	0.33254	0.332089	0.331899	0.332401	0.333047	0.332884	0.332094	0.331508	0.331489	0.33179	0.33209	0.332424	0.332485	0.332315	0.33229	0.332366	0.332228	0.331674	0.331082	0.330929	0.331513	0.332527	0.332899	0.332301	0.331637	0.331597	0.331722	0.331228	0.330903	0.331663	0.332425	0.332293	0.332156	0.332672	0.33315	0.333456	0.333634	0.333166	0.332483	0.332448	0.332904	0.333451	0.334149	0.334484	0.333975	0.33329
2	0.327853	0.328158	0.328849	0.329352	0.329114	0.328647	0.328961	0.329537	0.329107	0.327941	0.32722	0.32757	0.328216	0.328376	0.328609	0.328914	0.329045	0.329191	0.329253	0.329103	0.328629	0.327957	0.327649	0.328135	0.328986	0.329335	0.329014	0.328582	0.328669	0.329052	0.328799	0.328457	0.329081	0.329834	0.329908	0.329811	0.329637	0.329221	0.32909	0.329305	0.329253	0.329054	0.329408	0.329993	0.330316	0.330645	0.330749	0.330553	0.330619
2	0.314556	0.314901	0.315643	0.316046	0.315834	0.315599	0.315501	0.31534	0.314821	0.313999	0.313636	0.313822	0.313908	0.313966	0.31445	0.315016	0.315485	0.315749	0.315573	0.315418	0.315423	0.315013	0.314502	0.314989	0.316157	0.316635	0.316028	0.315166	0.314975	0.31545	0.315532	0.315106	0.315381	0.315992	0.315874	0.315479	0.315443	0.315708	0.31621	0.316747	0.316731	0.316167	0.316008	0.316472	0.316952	0.317509	0.318154	0.318332	0.317904
2	0.355686	0.355788	0.356498	0.356742	0.35605	0.355591	0.355954	0.356275	0.355961	0.355403	0.355224	0.355497	0.355834	0.356077	0.356313	0.356445	0.356716	0.356968	0.356798	0.356368	0.355953	0.355846	0.355933	0.356234	0.3569	0.357357	0.35711	0.356533	0.356369	0.356548	0.356446	0.356324	0.356623	0.357005	0.357084	0.356944	0.356971	0.357368	0.357865	0.357875	0.357299	0.356945	0.357447	0.357988	0.357841	0.357801	0.358191	0.358365	0.358222
2	0.326702	0.326768	0.327536	0.327893	0.327288	0.326867	0.327263	0.327601	0.327113	0.32628	0.325899	0.326188	0.326384	0.326024	0.325984	0.326561	0.327078	0.327166	0.327041	0.326951	0.326964	0.326836	0.326459	0.326719	0.327574	0.327675	0.327002	0.326525	0.326644	0.327047	0.327038	0.326942	0.327593	0.328389	0.328308	0.327887	0.328064	0.32825	0.328069	0.328028	0.327823	0.327442	0.327785	0.328551	0.328954	0.32943	0.329799	0.329575	0.329407
2	0.281336	0.282049	0.281813	0.281337	0.28145	0.28184	0.281983	0.281789	0.281467	0.281285	0.281467	0.2819	0.282128	0.282029	0.282038	0.282185	0.282041	0.281737	0.281736	0.282009	0.282234	0.282616	0.283251	0.283381	0.282914	0.282576	0.282699	0.283227	0.283633	0.283583	0.283393	0.283419	0.283712	0.283883	0.28375	0.28353	0.28358	0.283942	0.284297	0.284571	0.284614	0.284566	0.284733	0.285117	0.285774	0.286136	0.28572	0.285437	0.285945
2	0.308705	0.309287	0.309014	0.308645	0.308632	0.308841	0.308996	0.308995	0.308908	0.308631	0.308508	0.308706	0.308684	0.308457	0.308616	0.309014	0.308942	0.308788	0.309276	0.309798	0.309794	0.309798	0.310136	0.310334	0.310295	0.310441	0.310754	0.310742	0.310231	0.309918	0.310116	0.310282	0.310394	0.310682	0.310809	0.310636	0.310689	0.311024	0.311191	0.311207	0.311237	0.311305	0.31144	0.311831	0.312775	0.313593	0.313323	0.312808	0.313057
2	0.273403	0.273973	0.274081	0.274058	0.27415	0.274398	0.274468	0.274079	0.273493	0.273113	0.27331	0.27386	0.274044	0.273744	0.273512	0.273694	0.273825	0.273631	0.273691	0.274228	0.274701	0.274897	0.275065	0.274932	0.274542	0.274356	0.274392	0.274566	0.274725	0.274901	0.275151	0.2755	0.275955	0.276085	0.27559	0.274975	0.275012	0.275497	0.275767	0.275979	0.276185	0.276207	0.27639	0.276708	0.276991	0.277329	0.277375	0.277419	0.277981
2	0.292625	0.293215	0.293181	0.292984	0.293086	0.293315	0.293377	0.293091	0.292554	0.292202	0.292615	0.29331	0.293386	0.293221	0.293409	0.29374	0.293764	0.293662	0.293828	0.294034	0.293931	0.293705	0.293706	0.293683	0.29354	0.293583	0.293933	0.294463	0.294605	0.294431	0.294534	0.294638	0.294643	0.294664	0.294435	0.29418	0.294348	0.29487	0.295352	0.295516	0.29525	0.295028	0.295187	0.295558	0.296279	0.29687	0.296734	0.296679	0.297118
2	0.305779	0.305896	0.305326	0.305183	0.305673	0.305764	0.305525	0.30543	0.30515	0.305041	0.305413	0.305633	0.305714	0.305836	0.305821	0.30578	0.305776	0.305891	0.306158	0.30647	0.306522	0.306376	0.306482	0.306466	0.306328	0.306721	0.307465	0.307998	0.307761	0.307197	0.307355	0.307677	0.307573	0.307388	0.307068	0.306781	0.306975	0.307371	0.307636	0.307826	0.307821	0.307917	0.308316	0.308762	0.309266	0.309538	0.309238	0.309147	0.309773
2	0.282514	0.282655	0.282168	0.2821	0.282621	0.283127	0.28318	0.282784	0.282151	0.281642	0.281806	0.282265	0.282361	0.282581	0.283176	0.283297	0.282588	0.282008	0.282393	0.283252	0.283675	0.2836	0.283396	0.283218	0.283279	0.283351	0.283374	0.283661	0.283982	0.284261	0.284438	0.284449	0.284497	0.284423	0.284207	0.284092	0.284119	0.284279	0.284586	0.28493	0.285029	0.285047	0.285211	0.285468	0.286107	0.286813	0.286767	0.286394	0.286439
2	0.300635	0.300753	0.300463	0.300434	0.300635	0.300936	0.300994	0.30081	0.300565	0.300166	0.300224	0.301073	0.301523	0.301078	0.300823	0.301148	0.30127	0.301044	0.301218	0.301608	0.30161	0.301519	0.301742	0.302084	0.302151	0.30193	0.301964	0.302256	0.302238	0.302242	0.302523	0.302735	0.302811	0.302821	0.30283	0.302728	0.302624	0.302902	0.303312	0.303424	0.303326	0.303451	0.303929	0.304497	0.305153	0.305453	0.305061	0.304842	0.305209
2	0.276237	0.276595	0.276116	0.275572	0.275606	0.276068	0.276699	0.277057	0.276756	0.276271	0.276186	0.276408	0.276499	0.276449	0.276601	0.276722	0.27652	0.276391	0.276572	0.276808	0.276997	0.277126	0.27716	0.277044	0.276965	0.277182	0.2774	0.277294	0.277069	0.277243	0.277649	0.277765	0.277942	0.27835	0.278424	0.278042	0.277757	0.277971	0.278374	0.278571	0.278438	0.278306	0.278661	0.279161	0.27958	0.279932	0.279766	0.279586	0.280022
2	0.28964	0.289766	0.289399	0.289409	0.2897	0.289956	0.290319	0.290571	0.290372	0.289974	0.289982	0.290544	0.290982	0.290977	0.290995	0.290987	0.290669	0.290535	0.290935	0.291279	0.291125	0.290999	0.291439	0.291741	0.291469	0.291244	0.2913	0.291612	0.291992	0.292087	0.291987	0.291981	0.292136	0.292253	0.292213	0.292071	0.291911	0.291972	0.292408	0.292804	0.292665	0.292499	0.292831	0.293263	0.293569	0.293861	0.293943	0.294009	0.294562
2	0.291638	0.291992	0.291632	0.291627	0.292042	0.292257	0.292229	0.292	0.291629	0.291362	0.291479	0.291814	0.291864	0.291739	0.291911	0.292323	0.292357	0.29185	0.291605	0.291978	0.292298	0.292417	0.292651	0.292593	0.292354	0.292537	0.292869	0.292893	0.292825	0.293036	0.293318	0.293294	0.293228	0.293433	0.293503	0.293241	0.29296	0.292916	0.293292	0.293896	0.294176	0.294128	0.294151	0.294449	0.295044	0.295332	0.295001	0.294827	0.295287
2	0.309164	0.309253	0.308948	0.308706	0.308806	0.309155	0.309154	0.308597	0.307915	0.307537	0.307965	0.308993	0.309494	0.309453	0.309797	0.310155	0.309943	0.309803	0.310103	0.310419	0.310454	0.310399	0.310424	0.310259	0.310035	0.310096	0.310571	0.311153	0.311182	0.310959	0.310984	0.311195	0.311402	0.311238	0.310776	0.310342	0.310075	0.310309	0.310889	0.311191	0.311252	0.311339	0.311312	0.311366	0.311919	0.312614	0.312789	0.312671	0.312893
2	0.282275	0.282434	0.281934	0.281512	0.281719	0.28212	0.282104	0.282062	0.282035	0.281558	0.281274	0.281577	0.281709	0.281448	0.281589	0.282173	0.282351	0.282018	0.281727	0.281832	0.282258	0.282638	0.282811	0.282923	0.283069	0.283186	0.283387	0.283467	0.283051	0.282666	0.282701	0.282758	0.282928	0.283419	0.283832	0.283992	0.284087	0.283976	0.283677	0.283586	0.283549	0.283469	0.283566	0.283902	0.284573	0.285096	0.284931	0.284975	0.285758
2	0.292378	0.292464	0.291975	0.29177	0.291676	0.291377	0.290957	0.290633	0.290511	0.29051	0.290721	0.291128	0.291338	0.291383	0.29176	0.292246	0.292104	0.291521	0.291425	0.291715	0.291758	0.291909	0.292475	0.292661	0.292414	0.292371	0.29245	0.292627	0.292743	0.292734	0.292821	0.292827	0.292842	0.292976	0.292918	0.292693	0.292598	0.292832	0.293276	0.293614	0.293789	0.293982	0.294253	0.294517	0.295	0.295424	0.294956	0.294325	0.294682
2	0.279803	0.280296	0.279786	0.279386	0.279651	0.280118	0.2805	0.28041	0.279606	0.278896	0.279165	0.279973	0.280248	0.279937	0.280004	0.280448	0.280434	0.280215	0.280335	0.280577	0.280714	0.280797	0.281024	0.281151	0.280925	0.2807	0.280849	0.281262	0.28124	0.280803	0.280672	0.280841	0.281098	0.281265	0.281017	0.280575	0.280537	0.281023	0.281549	0.281776	0.281711	0.281545	0.281604	0.282093	0.282772	0.283051	0.283027	0.283341	0.283845
2	0.296342	0.296796	0.296738	0.296484	0.296421	0.296611	0.296779	0.296859	0.296778	0.296396	0.295933	0.295772	0.29608	0.296416	0.296557	0.29679	0.296834	0.296722	0.296977	0.297227	0.297105	0.297087	0.297473	0.297603	0.297224	0.297081	0.297377	0.297701	0.297853	0.297815	0.297798	0.29798	0.298085	0.297994	0.297912	0.297832	0.297705	0.297787	0.298463	0.29947	0.299733	0.299168	0.298756	0.299069	0.300185	0.301054	0.300633	0.300068	0.300391
2	0.28756	0.287877	0.287107	0.286316	0.286336	0.286656	0.286802	0.286934	0.286934	0.286708	0.286705	0.287099	0.287226	0.287026	0.287271	0.287751	0.287653	0.287269	0.287359	0.287932	0.288343	0.288332	0.288378	0.28834	0.288098	0.288059	0.288214	0.288443	0.28847	0.28822	0.288214	0.288491	0.288777	0.289176	0.289261	0.288686	0.288274	0.288578	0.289237	0.289826	0.289865	0.289539	0.289523	0.289841	0.290242	0.290429	0.290357	0.29039	0.290655
2	0.292528	0.292462	0.291831	0.291716	0.292243	0.292613	0.292342	0.291936	0.291822	0.291653	0.291681	0.29217	0.292339	0.291946	0.291997	0.292657	0.2929	0.292637	0.292784	0.293241	0.293372	0.293576	0.294037	0.293957	0.293501	0.293439	0.293614	0.293681	0.293652	0.293699	0.293913	0.294047	0.294029	0.294069	0.293797	0.293125	0.292915	0.293386	0.293976	0.294313	0.294266	0.294216	0.29442	0.294787	0.295442	0.29602	0.296034	0.295847	0.295979
2	0.282143	0.282474	0.282426	0.2825	0.282799	0.28309	0.283046	0.282732	0.282423	0.282198	0.282252	0.282564	0.282776	0.282873	0.283064	0.283309	0.283376	0.28334	0.283597	0.283894	0.283682	0.283353	0.283635	0.283938	0.283607	0.283232	0.283272	0.283494	0.28356	0.283607	0.283808	0.283902	0.284	0.284197	0.284	0.283596	0.28368	0.284195	0.284767	0.285155	0.285033	0.284831	0.284958	0.285091	0.285509	0.286023	0.285931	0.285809	0.286287
2	0.31271	0.313034	0.313071	0.312964	0.312968	0.312835	0.312334	0.311871	0.311682	0.311605	0.31175	0.312125	0.312326	0.312387	0.312632	0.312942	0.312821	0.312237	0.312075	0.312511	0.312843	0.312941	0.31317	0.313265	0.313036	0.313006	0.313423	0.313877	0.313846	0.313553	0.31322	0.312971	0.313188	0.313749	0.314206	0.314243	0.314028	0.313868	0.313878	0.314063	0.31415	0.314215	0.314447	0.314887	0.315662	0.31622	0.316091	0.315821	0.31585
2	0.298092	0.298515	0.298332	0.298189	0.298315	0.298447	0.298479	0.298216	0.297665	0.297368	0.297803	0.298511	0.298664	0.298297	0.298109	0.298198	0.298127	0.298059	0.298378	0.298774	0.298883	0.298899	0.299062	0.299049	0.299012	0.299353	0.299707	0.299857	0.29963	0.299006	0.298707	0.29901	0.299559	0.30008	0.300065	0.299446	0.299156	0.299658	0.300351	0.300845	0.300946	0.300606	0.300441	0.300655	0.301149	0.301599	0.301454	0.301414	0.30202
2	0.300994	0.301064	0.300889	0.301048	0.301559	0.30189	0.301917	0.301938	0.30197	0.301862	0.301604	0.301437	0.301342	0.301155	0.301293	0.301712	0.301769	0.301569	0.301758	0.302076	0.301799	0.301286	0.301347	0.30173	0.301873	0.301838	0.302087	0.302618	0.302849	0.302821	0.302829	0.302832	0.303003	0.303329	0.303182	0.302567	0.30227	0.302454	0.302824	0.303317	0.303579	0.303516	0.303534	0.303728	0.304414	0.305244	0.305218	0.304877	0.305123
2	0.299389	0.299125	0.298573	0.29855	0.299294	0.300121	0.300361	0.299915	0.299176	0.29864	0.29869	0.299221	0.299414	0.299031	0.298986	0.29948	0.299857	0.2999	0.299902	0.300126	0.300289	0.300235	0.300274	0.300259	0.300101	0.299876	0.299813	0.300124	0.300428	0.300519	0.300351	0.300144	0.300474	0.301139	0.301355	0.300996	0.300671	0.300767	0.301064	0.301342	0.301336	0.301066	0.300962	0.30107	0.301535	0.302271	0.302539	0.302391	0.30262
2	0.295058	0.295134	0.294491	0.294353	0.294904	0.295344	0.295322	0.29489	0.294545	0.294796	0.295293	0.295836	0.296296	0.296166	0.295932	0.296066	0.295901	0.295539	0.295627	0.295857	0.295882	0.295962	0.296319	0.296329	0.295874	0.295732	0.296103	0.29643	0.296147	0.29581	0.296076	0.296603	0.297085	0.297339	0.297224	0.297028	0.296895	0.296793	0.296809	0.297081	0.297316	0.297247	0.297374	0.297849	0.298335	0.298465	0.298218	0.298233	0.298661
2	0.304988	0.305254	0.305149	0.30478	0.304645	0.304954	0.305213	0.305247	0.305223	0.305004	0.304945	0.305189	0.305211	0.305144	0.305408	0.305702	0.30548	0.305189	0.305359	0.305435	0.305364	0.305592	0.305905	0.30575	0.305387	0.305433	0.305893	0.306323	0.306248	0.305994	0.306122	0.306605	0.307246	0.307674	0.307352	0.306568	0.306302	0.306568	0.306834	0.307154	0.307488	0.307552	0.307319	0.307263	0.307702	0.308056	0.307938	0.307951	0.308575
2	0.312257	0.312636	0.31269	0.312743	0.312755	0.312758	0.312727	0.312707	0.312863	0.312751	0.312418	0.312561	0.31307	0.313269	0.313135	0.31314	0.313091	0.312924	0.313096	0.31331	0.313337	0.313605	0.314163	0.314076	0.313362	0.313169	0.313519	0.313881	0.313879	0.313557	0.313467	0.313695	0.314032	0.314456	0.3145	0.313825	0.313161	0.313276	0.314004	0.314828	0.315424	0.31549	0.315133	0.315066	0.315693	0.316241	0.31594	0.315587	0.315999
2	0.297875	0.298264	0.297769	0.297287	0.297506	0.297779	0.297858	0.297899	0.297597	0.297181	0.297116	0.297317	0.297605	0.297697	0.297571	0.297702	0.297927	0.297743	0.297651	0.29785	0.297681	0.297689	0.298651	0.299236	0.298619	0.298007	0.298119	0.298468	0.298531	0.298515	0.298771	0.298944	0.298759	0.298485	0.298328	0.298284	0.298328	0.298577	0.298883	0.299161	0.299241	0.299071	0.299189	0.299756	0.300449	0.300546	0.299945	0.299667	0.300084
2	0.311921	0.311977	0.311256	0.31085	0.311374	0.312122	0.312371	0.312077	0.311564	0.311048	0.310867	0.311072	0.311149	0.311338	0.311989	0.312487	0.312157	0.311309	0.311079	0.311477	0.31165	0.311719	0.311914	0.311862	0.311628	0.31165	0.312181	0.31269	0.312643	0.312644	0.312945	0.313157	0.313346	0.31355	0.313464	0.3129	0.312252	0.312174	0.312566	0.313101	0.313646	0.313792	0.313498	0.313629	0.314527	0.31503	0.314666	0.31465	0.315202
2	0.310167	0.310867	0.310721	0.310407	0.310221	0.310034	0.310042	0.310215	0.31013	0.309719	0.309589	0.31001	0.310346	0.3104	0.310591	0.310677	0.310561	0.310688	0.311068	0.31128	0.311142	0.311087	0.311534	0.311792	0.311552	0.311556	0.311958	0.312175	0.311789	0.311521	0.312042	0.312579	0.312687	0.312784	0.312638	0.311928	0.31136	0.311719	0.312661	0.313342	0.313349	0.312926	0.312569	0.31261	0.313204	0.313912	0.314064	0.313942	0.314111
2	0.296101	0.296448	0.29606	0.295469	0.295255	0.295671	0.296175	0.296212	0.29603	0.295793	0.295608	0.295826	0.296013	0.295871	0.296001	0.296211	0.295908	0.295513	0.295686	0.296147	0.296328	0.296375	0.296753	0.296864	0.296394	0.296358	0.296951	0.297383	0.29731	0.297061	0.296936	0.296885	0.296928	0.297135	0.297073	0.296549	0.296231	0.296483	0.297244	0.298074	0.298216	0.298051	0.298262	0.298683	0.299197	0.299541	0.299339	0.299148	0.299551
2	0.313336	0.313913	0.313804	0.313448	0.313325	0.313462	0.313541	0.313321	0.312824	0.312371	0.312485	0.313093	0.313507	0.313577	0.313659	0.313833	0.313793	0.313525	0.313481	0.313675	0.313913	0.314041	0.3141	0.314129	0.314055	0.314023	0.314118	0.31434	0.314586	0.314615	0.314406	0.314343	0.314769	0.31541	0.315381	0.314599	0.314047	0.314334	0.315177	0.315888	0.316014	0.315708	0.315603	0.315867	0.316187	0.316432	0.316433	0.316508	0.317115
2	0.292116	0.292313	0.29183	0.291394	0.291315	0.291529	0.291806	0.291864	0.291468	0.290803	0.29072	0.29148	0.292016	0.291767	0.29164	0.291931	0.291874	0.291519	0.291546	0.29185	0.29213	0.292474	0.292852	0.292766	0.292246	0.291906	0.292135	0.292768	0.293048	0.292978	0.293083	0.293161	0.293143	0.293234	0.293108	0.292792	0.292802	0.293329	0.294073	0.294421	0.294162	0.293817	0.293723	0.293938	0.294727	0.295416	0.295156	0.294966	0.295559
2	0.327568	0.327751	0.327833	0.32804	0.328122	0.328168	0.328314	0.328133	0.327418	0.326827	0.327086	0.327794	0.327973	0.327563	0.327511	0.328097	0.328371	0.327846	0.327666	0.328314	0.328699	0.328806	0.329186	0.329158	0.328657	0.328512	0.328985	0.329562	0.329579	0.329075	0.328508	0.328324	0.328618	0.329038	0.329277	0.329151	0.328989	0.329344	0.329712	0.329626	0.329508	0.32973	0.330242	0.330583	0.330704	0.330968	0.331139	0.331208	0.331591
2	0.321148	0.321462	0.321257	0.321031	0.321057	0.321272	0.321356	0.321144	0.320727	0.320384	0.320479	0.320757	0.320655	0.320561	0.32094	0.321309	0.321414	0.321533	0.32182	0.322043	0.321912	0.321514	0.321331	0.321401	0.321625	0.322013	0.322304	0.322541	0.322618	0.322287	0.321873	0.321835	0.322054	0.322213	0.322345	0.322443	0.322501	0.322695	0.323028	0.323329	0.323277	0.322861	0.322542	0.322879	0.324032	0.324872	0.324473	0.323753	0.323768
2	0.302327	0.302793	0.302702	0.302351	0.302141	0.302171	0.302183	0.30211	0.302151	0.302193	0.302167	0.302467	0.302923	0.302974	0.302826	0.302806	0.302709	0.302507	0.302595	0.302898	0.302854	0.302641	0.302984	0.303342	0.303144	0.303038	0.303234	0.303372	0.303333	0.30313	0.302989	0.303243	0.303724	0.303848	0.303385	0.302952	0.303146	0.303635	0.303938	0.304193	0.304362	0.3043	0.304281	0.30454	0.305158	0.305619	0.305525	0.305507	0.305737
2	0.31222	0.312246	0.311706	0.311442	0.311986	0.31292	0.313213	0.312592	0.311829	0.311527	0.311731	0.312312	0.312751	0.312619	0.312454	0.31262	0.312621	0.312454	0.312821	0.313425	0.313682	0.313785	0.313807	0.313455	0.313036	0.31312	0.313493	0.313714	0.313752	0.313773	0.31381	0.313946	0.314301	0.314766	0.314807	0.314267	0.31387	0.313974	0.314374	0.314823	0.314991	0.314934	0.314987	0.315214	0.31571	0.316206	0.316185	0.316249	0.316855
2	0.307104	0.307072	0.306693	0.306719	0.307181	0.307631	0.307761	0.307411	0.306719	0.306217	0.306329	0.306655	0.306554	0.306557	0.307334	0.308088	0.308051	0.307799	0.3079	0.308086	0.308117	0.308038	0.308134	0.308017	0.307484	0.307375	0.30786	0.308387	0.308528	0.30843	0.308574	0.308877	0.309059	0.309066	0.308746	0.308089	0.307725	0.30824	0.309118	0.30958	0.309518	0.309375	0.309488	0.309956	0.31076	0.311176	0.31095	0.310764	0.310827
2	0.318887	0.319247	0.31903	0.318806	0.31912	0.319443	0.31944	0.319462	0.319537	0.319558	0.31962	0.31963	0.319491	0.319485	0.319824	0.320116	0.319827	0.319251	0.319137	0.319523	0.319987	0.320322	0.320513	0.320306	0.32012	0.320359	0.320561	0.320498	0.320166	0.319962	0.320396	0.321009	0.32109	0.320942	0.320902	0.320656	0.320339	0.320457	0.320953	0.32151	0.321943	0.322285	0.322482	0.322359	0.322444	0.322797	0.322724	0.322655	0.323335
2	0.310164	0.310373	0.31033	0.31038	0.310488	0.31043	0.310182	0.310016	0.309941	0.309738	0.309673	0.310101	0.310519	0.310243	0.309825	0.310122	0.310611	0.310664	0.310817	0.311295	0.311423	0.311031	0.310956	0.311076	0.310817	0.310582	0.310802	0.311364	0.311617	0.311462	0.31136	0.311271	0.311196	0.311374	0.311478	0.311133	0.310919	0.31127	0.311697	0.311891	0.311791	0.311574	0.311808	0.312614	0.313499	0.313812	0.313397	0.312953	0.31321
2	0.327488	0.327661	0.327432	0.327217	0.327291	0.327507	0.327608	0.327398	0.32678	0.326255	0.326521	0.327153	0.327355	0.32724	0.327294	0.327469	0.327393	0.327177	0.327206	0.327616	0.328043	0.32811	0.328239	0.328181	0.327659	0.327494	0.327879	0.328251	0.328116	0.327782	0.328067	0.32867	0.328861	0.328904	0.328916	0.328581	0.32815	0.328259	0.328917	0.329426	0.32927	0.328759	0.328657	0.329118	0.329974	0.330664	0.330497	0.330418	0.331073
2	0.316863	0.317369	0.317209	0.317268	0.317572	0.317767	0.31748	0.316748	0.316189	0.315839	0.315782	0.316337	0.316789	0.31653	0.316378	0.316846	0.317117	0.316888	0.316865	0.317117	0.317262	0.31746	0.31791	0.318021	0.317527	0.317054	0.317258	0.317974	0.318303	0.318312	0.318379	0.318308	0.31832	0.318504	0.318825	0.319041	0.318842	0.318863	0.319239	0.319538	0.319609	0.319538	0.319472	0.319407	0.319801	0.320424	0.320429	0.320303	0.320692
3	0.387329	0.387204	0.387048	0.386718	0.386525	0.386441	0.386489	0.387082	0.387727	0.387879	0.387934	0.388018	0.387982	0.388133	0.388473	0.388585	0.388478	0.388296	0.388238	0.388413	0.388124	0.387437	0.38754	0.388258	0.388776	0.388936	0.388628	0.388187	0.388032	0.388203	0.388364	0.388432	0.388735	0.389038	0.389047	0.388802	0.388609	0.388819	0.389088	0.389038	0.388883	0.389037	0.389552	0.38983	0.389699	0.389641	0.389722	0.38979	0.389982
3	0.353406	0.353565	0.352776	0.351819	0.351676	0.352263	0.353051	0.353444	0.353385	0.353302	0.353429	0.353689	0.353686	0.353478	0.353415	0.353421	0.353367	0.353301	0.35362	0.354296	0.354416	0.353983	0.354	0.354273	0.354478	0.354905	0.355129	0.355031	0.35505	0.355064	0.354681	0.354454	0.354816	0.355208	0.355498	0.355609	0.355338	0.355015	0.354837	0.354746	0.354731	0.354853	0.355226	0.355585	0.355632	0.355521	0.355444	0.355588	0.355901
3	0.347	0.347011	0.346544	0.346183	0.346165	0.346065	0.346019	0.346313	0.346522	0.346731	0.347261	0.347413	0.346731	0.346201	0.346412	0.346848	0.347156	0.347328	0.347595	0.347981	0.34784	0.347187	0.34679	0.346777	0.346991	0.347237	0.347336	0.347196	0.347087	0.347299	0.347307	0.347158	0.347298	0.347791	0.348701	0.349287	0.348928	0.348275	0.347973	0.347928	0.347909	0.347864	0.347855	0.348102	0.348555	0.348787	0.348518	0.348283	0.348556
3	0.313916	0.313762	0.313197	0.312687	0.312685	0.312901	0.313175	0.313582	0.31345	0.312901	0.313079	0.313632	0.313578	0.313305	0.313286	0.31348	0.313849	0.313983	0.313884	0.314074	0.314119	0.313949	0.314283	0.314673	0.314707	0.314753	0.314735	0.31454	0.314626	0.315035	0.31494	0.314608	0.314966	0.315643	0.316044	0.316084	0.315992	0.315801	0.315308	0.314907	0.314936	0.315348	0.315872	0.316099	0.316128	0.316236	0.316373	0.316584	0.316737
3	0.339531	0.339648	0.339445	0.339025	0.338542	0.338077	0.338096	0.338911	0.339671	0.339655	0.339505	0.339491	0.339404	0.339588	0.34005	0.340429	0.340428	0.340028	0.339903	0.340413	0.340507	0.339695	0.339216	0.339647	0.340311	0.3406	0.340518	0.340418	0.340486	0.340538	0.340309	0.340374	0.340893	0.341279	0.341766	0.342249	0.342308	0.341981	0.341464	0.341285	0.341465	0.341637	0.341678	0.341417	0.341013	0.341104	0.341546	0.341833	0.342129
3	0.318364	0.318209	0.317491	0.316653	0.316391	0.316665	0.317215	0.317673	0.317851	0.317981	0.318086	0.317948	0.317719	0.317848	0.318169	0.31844	0.318713	0.318797	0.318776	0.318708	0.318211	0.31775	0.317926	0.318265	0.318536	0.318868	0.319065	0.318937	0.318723	0.318674	0.318584	0.318779	0.319581	0.320283	0.320351	0.320052	0.320079	0.320467	0.320333	0.319719	0.319341	0.319287	0.319508	0.319805	0.319906	0.319922	0.319855	0.319971	0.320576
3	0.351185	0.350842	0.350337	0.349775	0.349603	0.349861	0.350278	0.350698	0.350906	0.350911	0.35071	0.3504	0.350223	0.350543	0.351133	0.351369	0.351166	0.350703	0.350617	0.35105	0.350876	0.35015	0.350022	0.350369	0.350945	0.351652	0.351733	0.351294	0.351269	0.351699	0.351761	0.351424	0.35152	0.352241	0.352936	0.352969	0.352638	0.352606	0.352664	0.352555	0.352558	0.352833	0.352931	0.352549	0.352282	0.352383	0.352543	0.352826	0.353195
3	0.345475	0.345031	0.344535	0.344074	0.343892	0.344226	0.344799	0.345093	0.345136	0.345293	0.345518	0.345519	0.345329	0.345221	0.345247	0.345425	0.3455	0.345336	0.345477	0.345728	0.345333	0.34487	0.345087	0.345571	0.345909	0.346036	0.345901	0.345504	0.345232	0.345407	0.345507	0.345572	0.346169	0.346868	0.347174	0.347138	0.34683	0.346331	0.34596	0.346024	0.346201	0.346289	0.34653	0.346889	0.347302	0.347612	0.347447	0.347042	0.346916
3	0.364557	0.364671	0.364126	0.363509	0.363161	0.362978	0.363001	0.363213	0.36365	0.364279	0.364662	0.364407	0.36384	0.363701	0.363833	0.363891	0.364126	0.364289	0.364239	0.364237	0.363879	0.363398	0.363641	0.364123	0.364344	0.364573	0.364785	0.364765	0.364606	0.364756	0.365031	0.365197	0.365617	0.36603	0.366117	0.365983	0.365771	0.365682	0.365559	0.365302	0.36524	0.365664	0.366124	0.36609	0.365827	0.365624	0.365667	0.366078	0.366469
3	0.32599	0.325888	0.325474	0.325043	0.324932	0.325113	0.325399	0.325761	0.325786	0.325403	0.325293	0.325577	0.325782	0.325796	0.325704	0.325713	0.325896	0.326041	0.32623	0.326368	0.325995	0.32537	0.325238	0.325537	0.325912	0.326454	0.326857	0.326724	0.326557	0.326772	0.326684	0.32633	0.326646	0.327455	0.328031	0.328041	0.327804	0.327509	0.327048	0.326858	0.327074	0.32742	0.327689	0.327817	0.327888	0.327887	0.327648	0.327325	0.327483
3	0.334835	0.335126	0.335051	0.334677	0.334453	0.334475	0.334926	0.335729	0.336094	0.335623	0.335017	0.334946	0.335012	0.334936	0.335057	0.335357	0.335522	0.33554	0.335753	0.336135	0.335957	0.335286	0.335113	0.335481	0.335814	0.336024	0.336059	0.335905	0.336002	0.33634	0.336268	0.336123	0.336454	0.336868	0.337053	0.336922	0.336891	0.337089	0.336812	0.336293	0.336264	0.336624	0.336868	0.336881	0.337039	0.337462	0.337662	0.337575	0.337712
3	0.332077	0.331797	0.33114	0.330521	0.330342	0.330507	0.330878	0.331297	0.331559	0.331754	0.331956	0.332044	0.331797	0.331465	0.331483	0.331681	0.331864	0.331986	0.332026	0.332021	0.331797	0.331567	0.331843	0.332463	0.332946	0.332981	0.332652	0.332341	0.332385	0.332706	0.332738	0.332624	0.332785	0.333143	0.333667	0.333873	0.333529	0.333237	0.333185	0.333099	0.332821	0.332713	0.333157	0.333655	0.333807	0.333935	0.33389	0.333588	0.333642
3	0.353199	0.353509	0.353159	0.352516	0.35198	0.351819	0.352155	0.352664	0.352684	0.35257	0.352719	0.352565	0.352163	0.352013	0.352041	0.352413	0.353042	0.353343	0.35356	0.354004	0.353928	0.353196	0.352724	0.352744	0.352988	0.353394	0.353618	0.353452	0.353439	0.353701	0.353735	0.353744	0.354011	0.354237	0.354343	0.354135	0.353798	0.353794	0.35385	0.353788	0.3537	0.35397	0.354511	0.354696	0.354744	0.354889	0.354801	0.354662	0.35499
3	0.334506	0.334566	0.334057	0.333625	0.333722	0.334173	0.334668	0.334873	0.334744	0.334854	0.335283	0.335337	0.335024	0.334892	0.334953	0.334965	0.334951	0.33494	0.335124	0.335562	0.335483	0.33496	0.335106	0.335818	0.336267	0.336317	0.336114	0.335864	0.336029	0.336509	0.336461	0.336173	0.336636	0.337324	0.337546	0.337421	0.337142	0.336856	0.336627	0.336682	0.336972	0.33724	0.337519	0.337754	0.337761	0.33769	0.337586	0.337549	0.337848
3	0.354585	0.354763	0.35429	0.353491	0.353065	0.353305	0.354169	0.354933	0.354848	0.354294	0.354119	0.354323	0.354161	0.353887	0.35407	0.354419	0.354663	0.354764	0.354943	0.355237	0.354954	0.354303	0.354217	0.354365	0.354545	0.355056	0.35537	0.355117	0.354792	0.354845	0.354873	0.354845	0.355263	0.355665	0.355826	0.355997	0.356079	0.355971	0.355576	0.355135	0.354931	0.355	0.355211	0.355394	0.355386	0.355123	0.35485	0.354837	0.355207
3	0.338003	0.337658	0.337073	0.336561	0.336299	0.336379	0.336822	0.337267	0.337503	0.337811	0.338285	0.338469	0.338044	0.33756	0.337561	0.337938	0.338228	0.338134	0.338039	0.338304	0.338282	0.337812	0.337779	0.338203	0.338573	0.338624	0.338227	0.337791	0.338091	0.338903	0.339008	0.338588	0.338705	0.339284	0.339858	0.340189	0.340272	0.340122	0.33983	0.339643	0.339464	0.339539	0.340108	0.340478	0.340306	0.340137	0.340063	0.340008	0.340275
3	0.336867	0.336998	0.337002	0.336757	0.336314	0.33597	0.336028	0.336697	0.337528	0.337848	0.337714	0.337354	0.336888	0.336812	0.337089	0.337279	0.337238	0.336943	0.336933	0.337281	0.336958	0.33622	0.336333	0.337093	0.337759	0.338111	0.338065	0.337642	0.337273	0.337371	0.337446	0.337355	0.337675	0.338373	0.339009	0.339278	0.339308	0.339211	0.338748	0.338214	0.337973	0.337891	0.33803	0.33851	0.339043	0.339249	0.338948	0.338559	0.33859
3	0.338354	0.338493	0.33828	0.337792	0.337425	0.337316	0.337535	0.337976	0.338226	0.338451	0.338994	0.339512	0.339383	0.338756	0.338373	0.338547	0.338782	0.338669	0.338713	0.339	0.338737	0.338139	0.338074	0.338366	0.338732	0.339146	0.339287	0.339173	0.339218	0.339444	0.339383	0.339409	0.339929	0.340314	0.3405	0.340664	0.340608	0.340342	0.339972	0.339733	0.339806	0.340122	0.340427	0.340505	0.34058	0.340694	0.340491	0.340332	0.340593
3	0.3249	0.324464	0.323624	0.322968	0.322948	0.323181	0.323637	0.32433	0.324582	0.324505	0.324782	0.325139	0.324979	0.324505	0.324068	0.323857	0.324041	0.324464	0.32505	0.325631	0.325396	0.324603	0.324417	0.324694	0.324911	0.325062	0.325203	0.325338	0.325439	0.325549	0.325499	0.325331	0.325517	0.326199	0.326996	0.327378	0.327249	0.326992	0.326769	0.326571	0.326354	0.326155	0.326222	0.326556	0.326843	0.326792	0.326411	0.32628	0.326861
3	0.353297	0.353198	0.352861	0.352553	0.352479	0.352511	0.35268	0.353166	0.353617	0.353712	0.353837	0.353817	0.353413	0.353251	0.353375	0.353632	0.353943	0.353947	0.353777	0.353695	0.353343	0.352879	0.353067	0.353556	0.353854	0.354219	0.354467	0.354281	0.354069	0.35398	0.35357	0.353357	0.354015	0.354979	0.355538	0.35545	0.355139	0.35497	0.354684	0.354487	0.354713	0.355174	0.355362	0.355281	0.355547	0.355833	0.35548	0.355038	0.355102
3	0.319159	0.31903	0.318083	0.317377	0.317497	0.317661	0.317633	0.317794	0.318096	0.318362	0.318544	0.318585	0.3183	0.318087	0.318338	0.318698	0.318756	0.318551	0.318561	0.318938	0.318882	0.318252	0.318075	0.318468	0.318857	0.31909	0.319359	0.319508	0.319412	0.319418	0.319282	0.319115	0.319366	0.319754	0.320193	0.320427	0.320126	0.319714	0.319426	0.319187	0.319139	0.319529	0.320059	0.319967	0.319579	0.319733	0.320079	0.320148	0.320195
3	0.347784	0.347985	0.347773	0.347451	0.347034	0.346779	0.34719	0.347903	0.348118	0.347977	0.347864	0.347489	0.346947	0.346878	0.347299	0.347825	0.348148	0.34799	0.347728	0.348121	0.348532	0.348221	0.347976	0.348057	0.348145	0.348234	0.348109	0.348051	0.348423	0.348771	0.348679	0.348512	0.348823	0.349469	0.349887	0.349788	0.349663	0.349583	0.348905	0.348221	0.348247	0.34869	0.349165	0.349307	0.349208	0.349232	0.349224	0.349222	0.349534
3	0.343611	0.343421	0.342826	0.34209	0.342121	0.342501	0.342744	0.343283	0.343748	0.34379	0.343873	0.343987	0.343619	0.343281	0.34333	0.343232	0.342967	0.342776	0.342861	0.343398	0.343571	0.342979	0.342774	0.343296	0.343825	0.343854	0.343385	0.342911	0.343072	0.343739	0.343841	0.343472	0.343481	0.343916	0.34452	0.34494	0.345149	0.345011	0.344432	0.344082	0.344145	0.344327	0.344535	0.344684	0.344727	0.34476	0.34482	0.344762	0.344767
3	0.321381	0.321446	0.321349	0.321407	0.321427	0.321275	0.321376	0.321686	0.321922	0.322179	0.322288	0.321946	0.321387	0.321202	0.321504	0.322055	0.322473	0.322605	0.322734	0.322917	0.322592	0.321811	0.321478	0.321703	0.322052	0.322279	0.322387	0.322415	0.32254	0.322781	0.322668	0.322333	0.322305	0.322733	0.323279	0.323514	0.323648	0.323614	0.323125	0.322564	0.322258	0.322474	0.323211	0.323842	0.323972	0.323827	0.323625	0.323595	0.324031
3	0.326875	0.326976	0.326755	0.326277	0.325874	0.325877	0.326139	0.326346	0.326418	0.326532	0.326898	0.327346	0.327397	0.327031	0.326545	0.326349	0.326517	0.326624	0.326925	0.327483	0.327355	0.326794	0.326863	0.327318	0.327581	0.327668	0.327646	0.327466	0.327505	0.327945	0.328112	0.328003	0.328124	0.328295	0.328391	0.328389	0.328332	0.328382	0.328305	0.328098	0.328196	0.328654	0.329034	0.329074	0.32893	0.328865	0.328808	0.32879	0.329145
3	0.371365	0.37127	0.370723	0.370247	0.37024	0.370581	0.371022	0.371455	0.37155	0.371336	0.371353	0.371395	0.371069	0.370791	0.370763	0.370901	0.371143	0.371429	0.371855	0.372253	0.371946	0.371153	0.37098	0.37135	0.371626	0.37171	0.37177	0.371718	0.37145	0.371394	0.371568	0.371732	0.371968	0.37251	0.373257	0.373271	0.372444	0.371672	0.37118	0.370988	0.371242	0.371935	0.372649	0.372932	0.373019	0.373001	0.37271	0.372495	0.372647
3	0.359493	0.359617	0.359541	0.358995	0.358316	0.357927	0.358014	0.358673	0.359164	0.359235	0.359271	0.359081	0.358673	0.358476	0.358365	0.358404	0.358916	0.359399	0.359504	0.359643	0.359309	0.358205	0.357706	0.35825	0.358878	0.359135	0.359363	0.359483	0.359337	0.359288	0.35914	0.358882	0.359082	0.35969	0.360263	0.360576	0.360689	0.360548	0.359943	0.359432	0.359559	0.359901	0.359955	0.359883	0.359921	0.359953	0.35996	0.359993	0.36019
3	0.357084	0.357333	0.357076	0.35654	0.356263	0.356217	0.356654	0.357343	0.357545	0.357435	0.357438	0.357389	0.356929	0.356551	0.356679	0.356868	0.356934	0.356914	0.356942	0.357268	0.357205	0.356533	0.356215	0.356245	0.356417	0.356826	0.356936	0.356724	0.356974	0.357345	0.356939	0.356602	0.357161	0.357925	0.358283	0.35808	0.357671	0.357475	0.357477	0.357629	0.357692	0.357686	0.357765	0.357928	0.358187	0.358342	0.35798	0.357478	0.357781
3	0.34111	0.340948	0.340552	0.340376	0.340673	0.341344	0.342002	0.342157	0.341773	0.341518	0.341744	0.341809	0.341134	0.340531	0.340621	0.341121	0.341646	0.341803	0.341841	0.341937	0.341349	0.340531	0.340727	0.34139	0.341838	0.34208	0.341925	0.341695	0.34194	0.342327	0.342127	0.341748	0.341895	0.34237	0.342989	0.343422	0.343362	0.342887	0.342169	0.341825	0.341846	0.342035	0.342726	0.343469	0.343667	0.343342	0.342799	0.342561	0.342799
3	0.359296	0.35939	0.359022	0.358341	0.357954	0.358199	0.35898	0.359648	0.359825	0.359843	0.359889	0.359723	0.359197	0.359011	0.35961	0.360335	0.360558	0.36044	0.36059	0.36105	0.360921	0.360215	0.359988	0.360205	0.360474	0.360681	0.360506	0.3601	0.360207	0.36077	0.360922	0.360786	0.360911	0.361339	0.361947	0.362211	0.361952	0.361656	0.361375	0.360894	0.360537	0.360906	0.361642	0.361943	0.361875	0.361863	0.361896	0.361915	0.362169
3	0.359234	0.359032	0.358807	0.358604	0.358444	0.358204	0.358197	0.358605	0.358798	0.358661	0.358848	0.359387	0.359424	0.358925	0.358731	0.359273	0.359864	0.359549	0.359043	0.359329	0.359376	0.358656	0.358448	0.359026	0.359717	0.360127	0.359947	0.359414	0.359271	0.359458	0.359356	0.35937	0.359816	0.360204	0.360618	0.36082	0.360409	0.360023	0.360013	0.360304	0.36065	0.360745	0.360748	0.360831	0.360865	0.360733	0.360573	0.360647	0.360822
3	0.353106	0.353195	0.352477	0.351968	0.352126	0.352395	0.352619	0.352918	0.352915	0.352867	0.353335	0.353669	0.353348	0.353033	0.352928	0.353067	0.353353	0.353282	0.353301	0.353836	0.353956	0.3535	0.353463	0.35374	0.353921	0.353931	0.353709	0.353397	0.353242	0.3534	0.353566	0.353755	0.354276	0.35505	0.355726	0.3558	0.355517	0.355365	0.35512	0.354775	0.354419	0.354149	0.354356	0.355037	0.355757	0.356116	0.355961	0.355722	0.355904
3	0.351897	0.351839	0.350939	0.350052	0.349791	0.350112	0.350584	0.350835	0.350685	0.350464	0.350683	0.350881	0.350437	0.350137	0.350416	0.35079	0.350975	0.351036	0.351273	0.351511	0.351391	0.351199	0.351308	0.35131	0.351206	0.35149	0.351899	0.3519	0.35177	0.351972	0.351836	0.351365	0.351552	0.352239	0.352845	0.353183	0.353114	0.352607	0.35199	0.351739	0.351872	0.352398	0.353048	0.353139	0.352722	0.35231	0.352102	0.35217	0.352611
3	0.342902	0.343039	0.342569	0.342003	0.341843	0.342128	0.342419	0.342467	0.342453	0.342513	0.342477	0.342167	0.341687	0.341619	0.341863	0.341827	0.341619	0.34155	0.34198	0.34277	0.342735	0.341863	0.341522	0.341838	0.342264	0.342729	0.342947	0.342562	0.342266	0.342695	0.342944	0.342783	0.342795	0.342898	0.343348	0.343902	0.343935	0.343725	0.343423	0.34308	0.343053	0.343378	0.343729	0.343987	0.344015	0.343789	0.343615	0.343625	0.343884
3	0.343919	0.343574	0.342897	0.342456	0.342582	0.342927	0.34322	0.343471	0.343458	0.343367	0.343668	0.343992	0.343621	0.343035	0.342934	0.343255	0.343541	0.343508	0.343628	0.343967	0.343563	0.342739	0.342891	0.343722	0.344384	0.344832	0.344937	0.344587	0.344355	0.344463	0.344244	0.343926	0.344183	0.344787	0.345294	0.345233	0.344835	0.344813	0.344787	0.344543	0.344402	0.344419	0.344653	0.345003	0.345244	0.345287	0.345128	0.344931	0.345029
3	0.35397	0.353919	0.353486	0.353156	0.353084	0.353202	0.353463	0.353576	0.353437	0.353533	0.353852	0.353845	0.353519	0.353486	0.353724	0.353851	0.353778	0.353638	0.353933	0.354578	0.354595	0.353944	0.353722	0.354061	0.354399	0.35467	0.354832	0.354615	0.354364	0.354612	0.354855	0.354799	0.355031	0.355707	0.356363	0.356446	0.355956	0.355599	0.355689	0.355754	0.355477	0.355318	0.355612	0.356012	0.356404	0.356935	0.357163	0.356911	0.356842
3	0.350252	0.350183	0.349741	0.349226	0.348956	0.349003	0.349294	0.349641	0.349815	0.349963	0.350125	0.350126	0.34983	0.349509	0.349253	0.34917	0.349548	0.349853	0.34987	0.349976	0.349907	0.349559	0.349607	0.350033	0.350128	0.349939	0.349842	0.349711	0.349555	0.349495	0.349237	0.349038	0.349545	0.350469	0.351144	0.351322	0.351146	0.350911	0.350646	0.350378	0.350348	0.350749	0.351193	0.351245	0.351235	0.351275	0.350991	0.350729	0.350998
3	0.360567	0.360589	0.360485	0.36024	0.359763	0.359392	0.359564	0.360206	0.360673	0.360849	0.36096	0.360839	0.360358	0.360098	0.360166	0.360176	0.360311	0.360467	0.360618	0.361103	0.361133	0.360422	0.360111	0.360468	0.361161	0.361857	0.362056	0.361595	0.361198	0.361543	0.361833	0.361431	0.361042	0.36135	0.361934	0.361768	0.36109	0.360949	0.361256	0.361495	0.361506	0.361487	0.361663	0.361893	0.362167	0.362367	0.362277	0.362272	0.362666
3	0.350564	0.35069	0.350007	0.349139	0.348843	0.349015	0.34938	0.349823	0.350027	0.349956	0.350011	0.350218	0.350138	0.349994	0.350079	0.350303	0.350543	0.350663	0.350873	0.351194	0.351033	0.350583	0.35056	0.350796	0.351011	0.351211	0.351363	0.35126	0.351187	0.351547	0.351668	0.351295	0.351271	0.351894	0.352666	0.352915	0.352545	0.35209	0.35171	0.351429	0.3514	0.351732	0.352279	0.352635	0.352621	0.352261	0.351888	0.352128	0.352861
3	0.357684	0.35743	0.356984	0.356509	0.356409	0.356538	0.356674	0.356918	0.357092	0.357262	0.357536	0.357619	0.35747	0.357534	0.357573	0.357267	0.357044	0.357202	0.35789	0.358634	0.358461	0.357909	0.357926	0.358141	0.358393	0.358744	0.358892	0.358716	0.35841	0.358137	0.357874	0.357909	0.358473	0.359088	0.359363	0.359271	0.35897	0.358708	0.358446	0.358402	0.358644	0.358969	0.359276	0.359342	0.359326	0.359397	0.359401	0.359618	0.360132
3	0.341939	0.341541	0.341049	0.340567	0.340208	0.339977	0.339545	0.338486	0.33712	0.336374	0.33647	0.336834	0.336729	0.335921	0.334643	0.333717	0.333479	0.333091	0.332414	0.332191	0.332448	0.33261	0.33256	0.332178	0.331432	0.330649	0.330098	0.329868	0.329729	0.329556	0.329383	0.329099	0.328376	0.327618	0.327605	0.327747	0.327444	0.327238	0.327228	0.326963	0.326339	0.325435	0.324609	0.324272	0.324169	0.323901	0.323756	0.32394	0.324138
3	0.341466	0.341256	0.340984	0.340497	0.340279	0.340205	0.33991	0.339238	0.338017	0.336756	0.336258	0.336481	0.336772	0.336552	0.335752	0.335089	0.334722	0.333887	0.332979	0.332928	0.333244	0.333269	0.332998	0.332409	0.331772	0.331339	0.33081	0.329976	0.329142	0.328894	0.329236	0.329313	0.328566	0.327668	0.32757	0.32784	0.327678	0.327283	0.327029	0.326939	0.326723	0.32616	0.325683	0.325531	0.325377	0.325151	0.324801	0.324445	0.324413
3	0.35482	0.354693	0.354611	0.354237	0.353762	0.353705	0.353751	0.352809	0.35087	0.349501	0.349336	0.34973	0.350003	0.349528	0.348194	0.347091	0.347146	0.347495	0.347191	0.346829	0.346732	0.346537	0.346461	0.346127	0.345226	0.344588	0.344366	0.344161	0.343773	0.343014	0.342251	0.341796	0.341203	0.340777	0.341202	0.341756	0.341525	0.340722	0.340124	0.339896	0.339525	0.339034	0.338737	0.338422	0.337879	0.337486	0.337498	0.337488	0.337224
3	0.353428	0.353277	0.352792	0.352309	0.351738	0.351002	0.350584	0.35011	0.348801	0.347496	0.347214	0.347495	0.34748	0.346817	0.345838	0.345218	0.345143	0.344983	0.344641	0.344545	0.344277	0.343718	0.343402	0.343062	0.342364	0.341769	0.341621	0.341578	0.341009	0.340017	0.339412	0.339404	0.339246	0.338698	0.338481	0.33887	0.339227	0.338959	0.338389	0.337778	0.337025	0.336569	0.336441	0.335971	0.335165	0.334646	0.334593	0.334699	0.334694
3	0.348975	0.349021	0.348281	0.347228	0.346893	0.346898	0.346248	0.345027	0.343799	0.34305	0.342728	0.342538	0.342401	0.342066	0.341336	0.34071	0.340463	0.339944	0.339224	0.338929	0.338667	0.338192	0.338111	0.337858	0.336883	0.336328	0.336452	0.336249	0.335539	0.334973	0.33468	0.334301	0.333824	0.333618	0.333547	0.333312	0.333043	0.332612	0.332236	0.332053	0.331594	0.330997	0.330544	0.329991	0.32944	0.329242	0.329208	0.329151	0.329199
3	0.346113	0.346173	0.346218	0.345778	0.345095	0.344237	0.343264	0.342763	0.342273	0.341573	0.341381	0.341421	0.341276	0.340793	0.339528	0.338384	0.338297	0.338254	0.337666	0.337228	0.336988	0.336964	0.337346	0.337164	0.336391	0.335925	0.335399	0.334562	0.333778	0.333326	0.333294	0.333262	0.332595	0.331749	0.331807	0.332318	0.332404	0.332263	0.332164	0.331871	0.331186	0.33047	0.330102	0.329951	0.329547	0.328763	0.328148	0.328088	0.32839
3	0.356018	0.355714	0.355061	0.354604	0.354544	0.354451	0.353899	0.352799	0.351541	0.350663	0.350371	0.350522	0.35045	0.349916	0.348962	0.347833	0.347248	0.347123	0.347134	0.347109	0.346716	0.34627	0.346228	0.345918	0.344929	0.344041	0.343509	0.343065	0.342614	0.342311	0.34236	0.342254	0.341507	0.341101	0.341489	0.341343	0.340652	0.340475	0.340492	0.340201	0.339686	0.338787	0.337829	0.337467	0.33744	0.337266	0.337012	0.336978	0.337316
3	0.339629	0.339508	0.339306	0.33868	0.338183	0.337931	0.337434	0.336838	0.336103	0.33516	0.334466	0.334361	0.334522	0.33423	0.333087	0.331831	0.331432	0.33131	0.330662	0.329956	0.329735	0.3299	0.330143	0.329987	0.329361	0.328761	0.328359	0.327986	0.327344	0.326617	0.326333	0.326261	0.325677	0.32482	0.324785	0.325364	0.325612	0.32554	0.325284	0.324732	0.324011	0.323454	0.323147	0.322837	0.32239	0.321996	0.321735	0.321451	0.321446
3	0.35074	0.350578	0.350587	0.350121	0.348931	0.347958	0.347622	0.347225	0.346365	0.345678	0.345552	0.345506	0.345266	0.344743	0.343559	0.342485	0.342371	0.342284	0.341781	0.341667	0.34193	0.341954	0.341797	0.341508	0.340966	0.340439	0.340151	0.339663	0.338784	0.338168	0.338027	0.337849	0.33709	0.336403	0.33658	0.336877	0.336762	0.33652	0.336259	0.335731	0.334727	0.333734	0.333516	0.33389	0.333956	0.333536	0.333168	0.333068	0.333186
3	0.347692	0.347169	0.346603	0.346204	0.345668	0.344864	0.344349	0.34396	0.343153	0.342204	0.341836	0.342319	0.34249	0.341566	0.340143	0.339021	0.338697	0.338816	0.33883	0.338735	0.338521	0.338303	0.338269	0.337967	0.337229	0.336592	0.336235	0.335561	0.334436	0.333806	0.333936	0.334122	0.333655	0.332854	0.332535	0.33237	0.332057	0.33172	0.331235	0.330727	0.330425	0.330421	0.330566	0.330429	0.329738	0.328909	0.328569	0.328788	0.329094
3	0.371175	0.37123	0.371232	0.370647	0.36998	0.369591	0.36905	0.368264	0.367101	0.365867	0.365309	0.365605	0.366262	0.366227	0.364676	0.36273	0.362176	0.362462	0.362188	0.361771	0.361753	0.361786	0.36194	0.361948	0.36132	0.360352	0.35949	0.358782	0.358284	0.358169	0.358183	0.357812	0.356836	0.356025	0.356061	0.356316	0.356312	0.355978	0.355486	0.355252	0.354922	0.354391	0.35415	0.354039	0.353539	0.352573	0.351815	0.35193	0.352627
3	0.366878	0.366635	0.366047	0.36558	0.365405	0.365247	0.364693	0.363619	0.362103	0.360991	0.361018	0.361559	0.361448	0.360558	0.359535	0.358858	0.358532	0.358101	0.357687	0.357678	0.35765	0.357492	0.357532	0.357381	0.356902	0.356324	0.355862	0.355584	0.355161	0.354792	0.354714	0.354518	0.353697	0.352717	0.352383	0.352517	0.352629	0.352436	0.352271	0.352367	0.352051	0.35111	0.35035	0.350166	0.349847	0.349114	0.348621	0.34867	0.349018
3	0.349798	0.349669	0.349812	0.349548	0.348917	0.348054	0.347229	0.346706	0.345862	0.344941	0.344747	0.345143	0.345522	0.345232	0.344081	0.342891	0.342231	0.341838	0.34155	0.341369	0.341194	0.341248	0.341472	0.34107	0.340384	0.339845	0.339261	0.338934	0.33857	0.337872	0.337368	0.337221	0.336773	0.335886	0.335501	0.336096	0.336821	0.336691	0.336008	0.335537	0.335115	0.334607	0.334395	0.334233	0.333612	0.332799	0.332466	0.332726	0.332919
3	0.349666	0.349306	0.348787	0.348285	0.348294	0.3481	0.347441	0.346534	0.345237	0.344263	0.344201	0.344504	0.344384	0.343736	0.342835	0.342069	0.341759	0.341492	0.341098	0.34088	0.340629	0.340354	0.340105	0.339665	0.339254	0.338758	0.338146	0.337691	0.33713	0.336543	0.336485	0.33667	0.33609	0.335259	0.335418	0.335896	0.335633	0.334934	0.334529	0.334338	0.333931	0.333503	0.333272	0.333144	0.332777	0.331968	0.331249	0.331241	0.331677
3	0.361998	0.361834	0.361238	0.360449	0.360151	0.360172	0.359841	0.358699	0.357019	0.356104	0.356157	0.356411	0.356353	0.355744	0.354873	0.354388	0.354296	0.35384	0.353283	0.353271	0.35328	0.353112	0.353039	0.352616	0.351704	0.350916	0.350841	0.350849	0.349921	0.348883	0.348839	0.349072	0.348504	0.347831	0.347837	0.347976	0.34786	0.34758	0.347329	0.347179	0.346801	0.346041	0.345237	0.344643	0.344321	0.344225	0.344159	0.343972	0.343811
3	0.34492	0.344989	0.345005	0.344737	0.344379	0.34361	0.34254	0.341611	0.340633	0.339918	0.339905	0.340285	0.340292	0.339635	0.338753	0.338103	0.337693	0.337067	0.336349	0.33624	0.336498	0.33643	0.336056	0.335561	0.335183	0.334816	0.334091	0.33339	0.33304	0.332854	0.332742	0.332489	0.331875	0.331482	0.33169	0.331882	0.331527	0.330771	0.330228	0.330034	0.329704	0.329139	0.328793	0.328851	0.328706	0.328099	0.327555	0.327401	0.327611
3	0.36199	0.362093	0.362095	0.361664	0.3612	0.360693	0.359828	0.358646	0.357427	0.356732	0.35644	0.356371	0.35645	0.355983	0.354897	0.354248	0.354299	0.353971	0.353116	0.352768	0.352903	0.352818	0.35261	0.351988	0.351015	0.350769	0.351066	0.350792	0.349852	0.348856	0.348248	0.34818	0.348092	0.34794	0.34808	0.347841	0.347091	0.34639	0.346056	0.34616	0.346084	0.345555	0.345189	0.345034	0.344498	0.343716	0.343227	0.343086	0.343159
3	0.322846	0.322532	0.322061	0.321511	0.321258	0.321098	0.32061	0.319911	0.318968	0.317894	0.317388	0.317693	0.317832	0.317068	0.315932	0.315358	0.315534	0.315636	0.315303	0.314901	0.31431	0.313892	0.314116	0.313976	0.313181	0.312784	0.312949	0.31275	0.311879	0.311224	0.311155	0.311046	0.310445	0.309996	0.310331	0.310629	0.310266	0.309651	0.309224	0.30907	0.308892	0.308413	0.307833	0.307451	0.306896	0.30606	0.30566	0.305879	0.306198
3	0.388317	0.387875	0.387315	0.386705	0.386405	0.385963	0.384968	0.383955	0.383091	0.382407	0.382095	0.382277	0.382511	0.381838	0.380446	0.379364	0.378964	0.378901	0.378493	0.377693	0.376985	0.376519	0.376325	0.376264	0.376152	0.375797	0.375093	0.374248	0.37327	0.372318	0.371917	0.371704	0.370942	0.370164	0.370094	0.37059	0.371076	0.37096	0.370293	0.369438	0.368506	0.367812	0.367519	0.36714	0.366522	0.366024	0.365776	0.365797	0.365898
3	0.352632	0.352491	0.352616	0.352619	0.35219	0.351627	0.351064	0.350012	0.348539	0.347703	0.347674	0.347973	0.348124	0.347391	0.345898	0.344982	0.345211	0.345347	0.344853	0.34448	0.344183	0.343827	0.343676	0.343355	0.342982	0.342946	0.342593	0.341676	0.340904	0.340434	0.340033	0.339727	0.338959	0.337976	0.337899	0.338222	0.338227	0.338159	0.337921	0.337498	0.337247	0.337022	0.336486	0.335692	0.334914	0.334485	0.334403	0.33445	0.334517
3	0.332208	0.332389	0.332228	0.331564	0.330609	0.330089	0.330205	0.32977	0.32833	0.327032	0.326719	0.327136	0.327323	0.326816	0.325785	0.32488	0.324739	0.324708	0.324319	0.324191	0.32423	0.324247	0.324517	0.324461	0.323962	0.323444	0.322791	0.321994	0.321203	0.320842	0.321008	0.321049	0.320447	0.319834	0.320116	0.320569	0.320479	0.320278	0.320018	0.319555	0.319159	0.318974	0.31874	0.318341	0.318	0.317856	0.317833	0.317591	0.317219
3	0.398082	0.397628	0.397096	0.396329	0.395592	0.395048	0.394614	0.394101	0.393053	0.391766	0.391181	0.39126	0.391192	0.390727	0.389878	0.388887	0.38828	0.387648	0.386666	0.386121	0.385925	0.385499	0.385428	0.385616	0.385111	0.384185	0.383524	0.382831	0.381878	0.381386	0.381548	0.381468	0.380518	0.379521	0.379427	0.379644	0.379687	0.379635	0.379401	0.379041	0.378498	0.377837	0.377143	0.376192	0.374947	0.374134	0.374289	0.374769	0.375011
3	0.3661	0.365778	0.365415	0.364944	0.364629	0.364319	0.363699	0.362708	0.361433	0.360452	0.3603	0.360701	0.360741	0.360102	0.359046	0.358218	0.358094	0.357858	0.35718	0.356553	0.356193	0.356358	0.356727	0.356344	0.355342	0.354668	0.354479	0.354246	0.353654	0.353025	0.352755	0.352599	0.351924	0.35106	0.350855	0.351191	0.351427	0.351115	0.35046	0.349838	0.349302	0.34905	0.349018	0.348802	0.34812	0.34713	0.346535	0.346746	0.347323
3	0.36816	0.368219	0.368223	0.368016	0.367631	0.366994	0.366222	0.365403	0.364231	0.363043	0.362582	0.36307	0.36356	0.36299	0.361795	0.361114	0.361091	0.360744	0.360039	0.359696	0.359308	0.358817	0.358832	0.358644	0.357892	0.357285	0.356901	0.356312	0.35544	0.354851	0.354724	0.354412	0.353658	0.353183	0.353296	0.353544	0.353749	0.353751	0.353379	0.35264	0.351643	0.350712	0.350323	0.350492	0.350469	0.349886	0.349241	0.348977	0.349019
3	0.33821	0.338402	0.338161	0.337371	0.336669	0.33606	0.335298	0.334394	0.33335	0.332692	0.332894	0.333389	0.333271	0.332758	0.332313	0.331837	0.331283	0.330538	0.329846	0.329696	0.329883	0.330148	0.330555	0.330306	0.329342	0.328713	0.328356	0.327828	0.32697	0.32602	0.325782	0.326223	0.326003	0.325117	0.324775	0.324754	0.324656	0.324652	0.324656	0.324499	0.324017	0.323339	0.323035	0.323123	0.322871	0.322393	0.322198	0.322155	0.322173
3	0.326302	0.326045	0.32581	0.3253	0.325054	0.325188	0.324895	0.323898	0.322495	0.321528	0.321256	0.321395	0.32162	0.321129	0.319842	0.319047	0.3192	0.319278	0.318942	0.318605	0.318364	0.318337	0.318597	0.318462	0.317547	0.316673	0.316324	0.315978	0.315401	0.314908	0.314639	0.314597	0.314363	0.31386	0.313755	0.31402	0.31418	0.31408	0.313811	0.313604	0.313248	0.31248	0.311715	0.311351	0.311269	0.311157	0.310997	0.310944	0.311018
3	0.35533	0.354789	0.354025	0.353573	0.353443	0.353149	0.352583	0.351992	0.351231	0.350304	0.349565	0.349337	0.349467	0.349253	0.348398	0.34777	0.347795	0.347557	0.346852	0.346181	0.345645	0.345472	0.345792	0.34609	0.345836	0.345125	0.344453	0.343923	0.343345	0.343029	0.343014	0.342696	0.341745	0.34105	0.341529	0.341999	0.341491	0.340762	0.340314	0.340012	0.339491	0.338948	0.338836	0.338701	0.338101	0.337393	0.337076	0.337203	0.337394
3	0.364135	0.364104	0.363716	0.363052	0.362695	0.362441	0.361871	0.361116	0.360172	0.359349	0.359028	0.359143	0.358865	0.357793	0.356587	0.355986	0.355993	0.355903	0.355753	0.355765	0.355433	0.355029	0.355045	0.354736	0.354028	0.353747	0.35378	0.353433	0.352548	0.351809	0.351714	0.351692	0.350968	0.350148	0.350039	0.350105	0.350086	0.350162	0.350061	0.349637	0.349018	0.348546	0.348436	0.348281	0.347667	0.347013	0.346937	0.34737	0.347981
3	0.356621	0.356697	0.356386	0.355678	0.355196	0.355104	0.354847	0.353949	0.352735	0.351956	0.351743	0.351625	0.351169	0.35019	0.348717	0.347826	0.348215	0.348715	0.348639	0.34838	0.34776	0.346813	0.346261	0.345994	0.345732	0.34549	0.345037	0.344232	0.343239	0.342567	0.342481	0.342692	0.342486	0.341813	0.341361	0.341119	0.340806	0.340569	0.340457	0.34022	0.339741	0.339163	0.338599	0.338157	0.337775	0.337353	0.337075	0.33691	0.3368
3	0.335979	0.335912	0.335295	0.334748	0.334409	0.33381	0.333101	0.332513	0.331582	0.330804	0.330923	0.331223	0.330915	0.330054	0.32914	0.328766	0.328764	0.328395	0.327874	0.327773	0.327856	0.327861	0.32765	0.327023	0.326275	0.325632	0.325107	0.324704	0.324307	0.324102	0.324122	0.3241	0.323711	0.323031	0.322599	0.322464	0.3225	0.322657	0.322772	0.322562	0.321713	0.32081	0.32066	0.320829	0.320496	0.319754	0.319222	0.319108	0.319294
3	0.339052	0.33871	0.338326	0.337926	0.337466	0.337145	0.336709	0.336036	0.335176	0.334216	0.333549	0.333494	0.333564	0.333183	0.332399	0.331726	0.331557	0.331175	0.330237	0.329494	0.329299	0.329741	0.330428	0.330295	0.32947	0.328862	0.328367	0.32757	0.326672	0.326262	0.326551	0.326837	0.326281	0.325407	0.325303	0.325624	0.325452	0.324853	0.324401	0.324123	0.323841	0.323815	0.323924	0.323613	0.322874	0.322004	0.321175	0.320789	0.321396
3	0.357542	0.35757	0.357396	0.357141	0.356713	0.35605	0.355392	0.354623	0.353415	0.352335	0.352099	0.352711	0.353152	0.352559	0.351317	0.350158	0.349607	0.349552	0.349515	0.349358	0.348988	0.34879	0.349132	0.349095	0.348299	0.347543	0.347107	0.346605	0.345947	0.345553	0.345563	0.345587	0.344932	0.344064	0.344127	0.344704	0.344721	0.344131	0.343765	0.343756	0.343359	0.342646	0.342133	0.341536	0.340711	0.340159	0.340149	0.340448	0.340651
3	0.335873	0.335581	0.335143	0.334743	0.334489	0.334135	0.333648	0.332833	0.331411	0.33038	0.330614	0.331364	0.33141	0.330563	0.329382	0.328625	0.328405	0.327967	0.327357	0.327226	0.327501	0.327719	0.327612	0.326937	0.326081	0.325679	0.32551	0.325181	0.324696	0.324336	0.324284	0.324094	0.323364	0.322855	0.323068	0.323364	0.323267	0.322781	0.322267	0.321872	0.321033	0.31976	0.319187	0.319752	0.320217	0.319706	0.318983	0.31867	0.318671
3	0.355009	0.354738	0.354742	0.354487	0.354047	0.353433	0.352805	0.35219	0.351189	0.350188	0.349911	0.350135	0.349944	0.34937	0.348936	0.348351	0.347786	0.347413	0.347106	0.347144	0.347046	0.346457	0.345889	0.345214	0.344503	0.344104	0.343568	0.342669	0.34186	0.341465	0.341381	0.34133	0.340882	0.340435	0.340475	0.340413	0.340162	0.339867	0.339471	0.339273	0.33903	0.338249	0.337296	0.336723	0.336432	0.336347	0.336373	0.336133	0.335816
3	0.359809	0.359364	0.359245	0.358869	0.35818	0.357669	0.35708	0.356067	0.354675	0.353549	0.35305	0.352927	0.353087	0.353112	0.352585	0.35208	0.352001	0.35169	0.351041	0.350609	0.350261	0.349933	0.350011	0.349877	0.349097	0.348613	0.348384	0.347481	0.346434	0.34602	0.345935	0.345765	0.345024	0.344068	0.344076	0.344658	0.344768	0.344627	0.344542	0.344262	0.34385	0.343481	0.343008	0.34232	0.341519	0.340935	0.340864	0.341066	0.341058
3	0.359809	0.359364	0.359245	0.358869	0.35818	0.357669	0.35708	0.356067	0.354675	0.353549	0.35305	0.352927	0.353087	0.353112	0.352585	0.35208	0.352001	0.35169	0.351041	0.350609	0.350261	0.349933	0.350011	0.349877	0.349097	0.348613	0.348384	0.347481	0.346434	0.34602	0.345935	0.345765	0.345024	0.344068	0.344076	0.344658	0.344768	0.344627	0.344542	0.344262	0.34385	0.343481	0.343008	0.34232	0.341519	0.340935	0.340864	0.341066	0.341058
3	0.349514	0.349208	0.348806	0.348298	0.347874	0.347297	0.34644	0.345709	0.345003	0.343966	0.343134	0.343055	0.342958	0.342408	0.341708	0.341295	0.341294	0.340778	0.33962	0.338972	0.338945	0.338876	0.33883	0.338593	0.338057	0.337826	0.337774	0.337015	0.335762	0.335204	0.335279	0.335011	0.333939	0.333017	0.333184	0.333754	0.33407	0.334068	0.333831	0.333268	0.332393	0.331875	0.331921	0.331688	0.33064	0.329595	0.32939	0.329664	0.329961
3	0.356998	0.357221	0.357137	0.356805	0.356462	0.355701	0.35431	0.353018	0.352098	0.351519	0.351287	0.351328	0.351369	0.351052	0.350319	0.349521	0.34924	0.349324	0.349194	0.348986	0.348844	0.348607	0.348445	0.34821	0.347762	0.347173	0.346343	0.345345	0.34457	0.344418	0.344694	0.34484	0.344232	0.343299	0.343139	0.343383	0.343179	0.342854	0.34299	0.343221	0.342901	0.342048	0.341207	0.340618	0.340095	0.33976	0.339684	0.339617	0.339687
3	0.371356	0.370988	0.370575	0.369871	0.369454	0.369508	0.369154	0.36808	0.366763	0.36595	0.365825	0.365896	0.36579	0.365479	0.364648	0.363539	0.363069	0.362909	0.362476	0.36214	0.362002	0.36189	0.361768	0.361218	0.360396	0.360027	0.359757	0.359161	0.358501	0.357924	0.357736	0.357839	0.357298	0.356329	0.356123	0.356331	0.356078	0.355581	0.35533	0.355366	0.355232	0.354747	0.35417	0.353792	0.353529	0.352818	0.351963	0.351824	0.352148
3	0.361042	0.361315	0.3615	0.360744	0.359881	0.359503	0.359157	0.35855	0.357695	0.357132	0.357258	0.357405	0.356836	0.355977	0.355337	0.354763	0.354301	0.353972	0.353656	0.353463	0.353498	0.353701	0.353846	0.353358	0.352479	0.352122	0.352027	0.351475	0.350549	0.349837	0.349637	0.349648	0.349214	0.348468	0.348366	0.348819	0.348884	0.348405	0.347903	0.347666	0.347491	0.347116	0.346637	0.346239	0.345925	0.345635	0.345286	0.344975	0.34508
3	0.33621	0.335921	0.336276	0.336911	0.337365	0.337783	0.338372	0.338802	0.338621	0.337987	0.337597	0.337732	0.337873	0.3381	0.338504	0.3384	0.338013	0.338147	0.338752	0.33913	0.338738	0.338001	0.337943	0.338542	0.338967	0.338984	0.339125	0.339504	0.339608	0.339648	0.339724	0.339323	0.338808	0.338805	0.339116	0.339515	0.340064	0.340472	0.340504	0.340506	0.340797	0.341218	0.341418	0.341123	0.340641	0.34076	0.341347	0.341754	0.341799
3	0.379556	0.379429	0.379597	0.379697	0.379439	0.379416	0.379752	0.37989	0.379755	0.379646	0.379837	0.3802	0.380472	0.380636	0.380647	0.380492	0.380262	0.380284	0.380759	0.381169	0.380869	0.379964	0.379503	0.380014	0.380628	0.380948	0.381339	0.38172	0.381964	0.381878	0.381227	0.380465	0.380204	0.38067	0.381625	0.382175	0.381939	0.381682	0.381874	0.382417	0.383239	0.383831	0.383743	0.38328	0.382906	0.382802	0.382965	0.383408	0.383708
3	0.377554	0.377836	0.378296	0.378303	0.377732	0.377636	0.378191	0.378639	0.378729	0.378651	0.378582	0.37859	0.378645	0.378814	0.379027	0.378717	0.37815	0.378238	0.37881	0.37918	0.378964	0.37843	0.378446	0.379041	0.379385	0.379281	0.379386	0.379975	0.380454	0.380415	0.379965	0.379486	0.379437	0.379962	0.380722	0.381121	0.380928	0.380505	0.380315	0.380447	0.380985	0.381805	0.382188	0.381778	0.381044	0.380742	0.381037	0.381503	0.381696
3	0.366292	0.36576	0.365886	0.366442	0.366505	0.366255	0.366539	0.367123	0.367427	0.36745	0.367105	0.366553	0.366453	0.367027	0.367559	0.367248	0.366599	0.366885	0.36801	0.368651	0.368231	0.367191	0.366679	0.367111	0.367302	0.367073	0.367332	0.368056	0.368741	0.368761	0.368058	0.367526	0.367635	0.368022	0.368359	0.368542	0.368417	0.368226	0.368271	0.368557	0.369136	0.369664	0.369658	0.36939	0.369216	0.368953	0.368791	0.369077	0.369328
3	0.3833	0.382945	0.382577	0.382626	0.382882	0.383222	0.383509	0.38376	0.384097	0.384425	0.38441	0.384122	0.38415	0.384546	0.384721	0.384337	0.383891	0.383804	0.383994	0.384476	0.384755	0.38439	0.384285	0.384922	0.385562	0.385795	0.385815	0.385987	0.386145	0.386091	0.385816	0.385278	0.385099	0.385385	0.385733	0.386035	0.386097	0.386054	0.38606	0.386213	0.386629	0.387108	0.38742	0.38729	0.386728	0.386348	0.386372	0.386607	0.386892
3	0.405828	0.405397	0.405083	0.405141	0.405223	0.405682	0.406334	0.406398	0.406232	0.40628	0.406336	0.406408	0.406492	0.406315	0.406067	0.406206	0.406704	0.407229	0.407542	0.407563	0.406911	0.405932	0.405872	0.40643	0.406424	0.406013	0.406118	0.406704	0.407108	0.407283	0.407286	0.407167	0.406953	0.406568	0.406726	0.407515	0.40797	0.407945	0.407915	0.408316	0.409068	0.409429	0.409295	0.408869	0.408179	0.407987	0.408401	0.408675	0.408696
3	0.366342	0.366057	0.365996	0.365845	0.366003	0.366912	0.367926	0.368655	0.368888	0.368393	0.367669	0.367216	0.367371	0.367871	0.367969	0.367738	0.367533	0.367618	0.368221	0.368615	0.368037	0.367291	0.367444	0.367941	0.36798	0.36806	0.368563	0.369156	0.36956	0.369617	0.369195	0.368539	0.368241	0.368494	0.369122	0.369758	0.36992	0.369601	0.369295	0.369278	0.369603	0.370187	0.370711	0.371046	0.371103	0.370941	0.37092	0.371185	0.371093
3	0.383095	0.383085	0.383506	0.384007	0.384223	0.384381	0.384541	0.384683	0.384476	0.384105	0.384166	0.384397	0.384476	0.384657	0.384981	0.385149	0.385153	0.38508	0.385084	0.385236	0.385265	0.385121	0.385252	0.385724	0.38594	0.385949	0.386357	0.386947	0.387173	0.387003	0.386385	0.385925	0.386487	0.387374	0.387753	0.387782	0.3876	0.387232	0.386876	0.386791	0.387084	0.387506	0.387652	0.387434	0.387181	0.38712	0.38724	0.387553	0.38772
3	0.355358	0.355169	0.355113	0.354843	0.354982	0.355866	0.356824	0.357351	0.357043	0.35629	0.355963	0.356023	0.356258	0.356562	0.356541	0.356091	0.355666	0.355764	0.35661	0.35758	0.357536	0.356561	0.3559	0.355877	0.355744	0.355719	0.356397	0.357395	0.358105	0.35806	0.357378	0.356861	0.356922	0.357367	0.357882	0.358016	0.357894	0.357979	0.358065	0.358171	0.358523	0.358735	0.358557	0.358278	0.358188	0.358404	0.358751	0.358982	0.358882
3	0.372865	0.372295	0.37211	0.372101	0.372036	0.372474	0.373309	0.373741	0.373406	0.372757	0.372524	0.372838	0.373548	0.374324	0.374505	0.373833	0.3731	0.373281	0.374147	0.374588	0.374101	0.373366	0.373206	0.37337	0.373486	0.373935	0.374696	0.375079	0.37502	0.3749	0.374513	0.374	0.373995	0.37443	0.374851	0.374886	0.37469	0.374821	0.375091	0.375306	0.375894	0.376608	0.376759	0.376356	0.375894	0.37581	0.376067	0.376355	0.376423
3	0.343379	0.343155	0.343323	0.343186	0.342726	0.342829	0.343612	0.3443	0.344385	0.343912	0.343308	0.343192	0.343665	0.344221	0.344667	0.344838	0.344587	0.344639	0.345483	0.346099	0.345409	0.344192	0.343699	0.343727	0.343664	0.343769	0.344569	0.345557	0.345959	0.345893	0.345457	0.344992	0.345078	0.345477	0.345874	0.346137	0.346227	0.346289	0.346042	0.345693	0.346041	0.346729	0.346915	0.346647	0.346389	0.346376	0.346464	0.346489	0.346547
3	0.359241	0.35912	0.359381	0.359252	0.358828	0.359044	0.359873	0.360608	0.360908	0.360769	0.360384	0.360214	0.360448	0.360851	0.361154	0.360912	0.360389	0.360271	0.360573	0.360871	0.36067	0.360224	0.360215	0.360528	0.36072	0.361005	0.361429	0.361632	0.361839	0.361996	0.361686	0.361254	0.361202	0.361407	0.361646	0.362013	0.36247	0.36288	0.363063	0.363083	0.363323	0.363571	0.363421	0.363116	0.363065	0.363193	0.363395	0.363904	0.36417
3	0.381481	0.380985	0.381007	0.381172	0.381216	0.381367	0.38173	0.382082	0.382134	0.381952	0.381895	0.382081	0.38236	0.382681	0.382678	0.382074	0.381637	0.382014	0.382935	0.383444	0.382897	0.382138	0.38215	0.382461	0.382257	0.382218	0.383128	0.383978	0.384111	0.384167	0.384223	0.38414	0.384022	0.383764	0.383541	0.383673	0.384153	0.38443	0.384094	0.383955	0.384545	0.385098	0.385123	0.384841	0.384521	0.384364	0.384464	0.384647	0.384605
3	0.383663	0.383833	0.384536	0.384832	0.384558	0.384356	0.384803	0.385633	0.385991	0.385642	0.385219	0.385224	0.385644	0.38614	0.386372	0.385919	0.38544	0.385962	0.386696	0.38687	0.386456	0.385613	0.385187	0.385398	0.385524	0.385668	0.386407	0.387168	0.387427	0.387466	0.387111	0.386461	0.386343	0.386833	0.387302	0.387436	0.38754	0.387983	0.388399	0.388448	0.388541	0.388669	0.388481	0.38822	0.387877	0.387506	0.387607	0.38832	0.389114
3	0.368401	0.367926	0.368072	0.36828	0.368096	0.368226	0.368908	0.369449	0.369564	0.369507	0.369543	0.369786	0.369827	0.369554	0.369421	0.369292	0.36918	0.3694	0.369928	0.370414	0.370305	0.369614	0.369159	0.369367	0.369701	0.370194	0.371018	0.371553	0.371823	0.37196	0.371501	0.370828	0.370778	0.371191	0.371543	0.371777	0.371991	0.372083	0.371936	0.371871	0.372303	0.372881	0.37302	0.372964	0.372861	0.37252	0.372393	0.372711	0.372853
3	0.372186	0.372021	0.372244	0.372591	0.372757	0.372599	0.372617	0.373182	0.373661	0.37362	0.373334	0.373113	0.373176	0.373768	0.374453	0.374462	0.37409	0.373917	0.374216	0.374638	0.374287	0.373467	0.373391	0.373935	0.374072	0.373964	0.374168	0.374675	0.375207	0.3753	0.374791	0.373972	0.373505	0.373818	0.374475	0.374941	0.375264	0.375447	0.375497	0.375637	0.375966	0.376409	0.376636	0.376297	0.375446	0.374925	0.375279	0.375938	0.376252
3	0.363717	0.363596	0.363436	0.363281	0.363146	0.363243	0.36376	0.364407	0.364647	0.364526	0.364442	0.36443	0.364413	0.364934	0.36562	0.365201	0.364291	0.36432	0.365272	0.365908	0.365357	0.364426	0.364241	0.364397	0.364203	0.364196	0.365127	0.366511	0.367232	0.367053	0.366389	0.365827	0.365797	0.36607	0.366298	0.36633	0.366125	0.366084	0.366473	0.366923	0.367322	0.367514	0.367275	0.367	0.366853	0.366872	0.367234	0.367834	0.368319
3	0.340174	0.339721	0.340064	0.340508	0.340472	0.340621	0.34123	0.341651	0.341624	0.341466	0.341452	0.341519	0.341478	0.341562	0.341773	0.341656	0.341389	0.341437	0.341849	0.34212	0.341763	0.341381	0.341693	0.34206	0.341996	0.342012	0.34226	0.342571	0.343136	0.34381	0.343878	0.343465	0.343198	0.343228	0.343481	0.343682	0.343856	0.344002	0.343796	0.343722	0.344402	0.344954	0.344588	0.34396	0.343699	0.34403	0.344625	0.34484	0.344705
3	0.380714	0.380859	0.381158	0.381505	0.38151	0.381428	0.381694	0.382047	0.382195	0.382082	0.38199	0.382404	0.382951	0.383064	0.382807	0.382461	0.382262	0.382558	0.383155	0.3832	0.3825	0.381827	0.382007	0.382599	0.382751	0.382817	0.383374	0.384041	0.384104	0.38381	0.383519	0.383047	0.382802	0.382977	0.383262	0.383581	0.383827	0.3842	0.384536	0.384384	0.384331	0.384843	0.385382	0.385419	0.385036	0.38484	0.385082	0.385204	0.384937
3	0.400249	0.40003	0.399968	0.399815	0.399617	0.400086	0.401082	0.401704	0.401776	0.401746	0.40163	0.401325	0.401208	0.401379	0.401601	0.401445	0.401045	0.401161	0.401783	0.402314	0.402458	0.402222	0.401791	0.401559	0.40171	0.402103	0.40258	0.402965	0.4033	0.403568	0.403395	0.402936	0.402743	0.403018	0.403483	0.403706	0.403819	0.403955	0.403824	0.403655	0.403728	0.403728	0.403548	0.403422	0.403426	0.403571	0.404015	0.404525	0.404516
3	0.352815	0.352906	0.352849	0.35273	0.352837	0.353287	0.353639	0.353564	0.353327	0.353324	0.353439	0.353466	0.353408	0.353412	0.353726	0.353972	0.353965	0.354277	0.355072	0.355442	0.354581	0.353416	0.3533	0.353826	0.354106	0.354426	0.355026	0.355488	0.355715	0.355799	0.35534	0.354694	0.354776	0.355197	0.355468	0.355649	0.35557	0.35547	0.355494	0.355583	0.356099	0.356508	0.356311	0.356332	0.356644	0.356712	0.356855	0.357135	0.357086
3	0.356952	0.356611	0.356799	0.357009	0.357096	0.357457	0.357971	0.358411	0.358569	0.358117	0.357451	0.357457	0.357951	0.358223	0.358198	0.3578	0.357297	0.357648	0.358729	0.359206	0.358668	0.357984	0.35787	0.358056	0.358135	0.358275	0.358628	0.359009	0.359328	0.359603	0.359437	0.35876	0.358324	0.358578	0.359112	0.359269	0.359138	0.359506	0.360113	0.360061	0.359978	0.360422	0.36054	0.360181	0.3599	0.359762	0.359895	0.360495	0.361047
3	0.38275	0.382942	0.383031	0.382866	0.382705	0.383203	0.384026	0.384339	0.383999	0.3834	0.382962	0.383024	0.383632	0.384538	0.385024	0.384692	0.384379	0.384599	0.384996	0.385098	0.384639	0.384191	0.384381	0.384588	0.384261	0.384116	0.384623	0.385142	0.385416	0.385593	0.385409	0.385087	0.38489	0.384677	0.384793	0.385245	0.385448	0.385293	0.38504	0.385014	0.385448	0.386003	0.386289	0.386402	0.386355	0.38638	0.386685	0.386782	0.386434
3	0.365655	0.365407	0.365705	0.365922	0.365943	0.366273	0.366869	0.367126	0.367021	0.36705	0.366911	0.366484	0.366274	0.366508	0.366913	0.367041	0.366993	0.367142	0.36755	0.367838	0.367577	0.366962	0.366786	0.367062	0.367186	0.367439	0.368369	0.369509	0.369947	0.369523	0.368607	0.367815	0.367779	0.368541	0.36949	0.369912	0.369629	0.369253	0.369312	0.369494	0.369967	0.370769	0.370833	0.370151	0.369711	0.369771	0.370043	0.37034	0.3705
3	0.373258	0.373109	0.373517	0.373656	0.373617	0.374218	0.37515	0.375521	0.375256	0.37509	0.375081	0.374955	0.374786	0.374711	0.374807	0.374695	0.37452	0.374855	0.375429	0.375574	0.374921	0.374044	0.374106	0.374938	0.375435	0.375419	0.375351	0.375345	0.375389	0.375422	0.375114	0.374771	0.374907	0.375165	0.375233	0.375239	0.375422	0.375856	0.376248	0.376648	0.377162	0.377424	0.377388	0.377176	0.376777	0.376426	0.376505	0.377042	0.377291
3	0.376883	0.376783	0.37699	0.377473	0.377848	0.378248	0.378837	0.379206	0.379057	0.378622	0.378125	0.377981	0.3786	0.379487	0.379752	0.379139	0.378482	0.378606	0.379225	0.379616	0.3792	0.378379	0.378184	0.378456	0.378671	0.379226	0.380137	0.380626	0.380697	0.380707	0.380329	0.379817	0.379944	0.380456	0.38083	0.380965	0.380955	0.381122	0.381043	0.380624	0.380914	0.381656	0.381756	0.381502	0.381509	0.381721	0.38201	0.382204	0.382156
3	0.383414	0.38312	0.383478	0.384064	0.384413	0.384694	0.385173	0.385517	0.38526	0.384552	0.383805	0.383548	0.384112	0.385117	0.38571	0.385467	0.385029	0.385007	0.385369	0.385796	0.385771	0.385102	0.384588	0.384732	0.384814	0.384721	0.385053	0.385777	0.38657	0.386929	0.386242	0.385144	0.384685	0.384965	0.385791	0.386655	0.387187	0.387348	0.386949	0.386403	0.386615	0.387447	0.387746	0.387255	0.386884	0.38709	0.387531	0.387975	0.387941
3	0.341504	0.341877	0.342299	0.342386	0.34234	0.342637	0.343082	0.343213	0.34319	0.343254	0.343462	0.343732	0.343797	0.343794	0.343824	0.343619	0.343559	0.343976	0.344332	0.344316	0.344066	0.343586	0.343201	0.34291	0.342475	0.342588	0.343407	0.34426	0.344751	0.344892	0.344867	0.344684	0.344564	0.344674	0.344811	0.344857	0.344936	0.345184	0.345361	0.345393	0.345626	0.345976	0.346111	0.345973	0.345506	0.34516	0.345563	0.346394	0.346714
3	0.356585	0.356761	0.357144	0.357247	0.356981	0.356973	0.357577	0.358214	0.35836	0.358313	0.358116	0.357757	0.357732	0.358013	0.357953	0.357416	0.357107	0.35742	0.358209	0.358881	0.358609	0.357644	0.35718	0.35763	0.358292	0.358678	0.359028	0.35941	0.35963	0.359725	0.359446	0.358917	0.358675	0.358536	0.358644	0.359185	0.359684	0.35996	0.360019	0.360097	0.360467	0.360791	0.360736	0.360582	0.360566	0.360665	0.360933	0.361287	0.36139
3	0.387703	0.387936	0.388469	0.388508	0.388322	0.388615	0.389476	0.390096	0.389901	0.389525	0.389329	0.38924	0.389597	0.390073	0.390064	0.389457	0.388766	0.388919	0.389968	0.390741	0.390478	0.38994	0.389913	0.390027	0.390017	0.390242	0.390842	0.391475	0.391655	0.391419	0.391045	0.390844	0.391093	0.391404	0.3916	0.391766	0.391656	0.391415	0.391353	0.391538	0.39224	0.393109	0.393167	0.392567	0.39208	0.391937	0.392191	0.392679	0.392791
3	0.372558	0.372664	0.37299	0.373136	0.372972	0.373057	0.37372	0.374292	0.374236	0.374225	0.374277	0.373983	0.373869	0.374113	0.374454	0.374636	0.374553	0.374562	0.374881	0.375113	0.374913	0.374287	0.373614	0.37325	0.373376	0.373998	0.374718	0.375232	0.375641	0.376174	0.376106	0.375136	0.374442	0.374673	0.375473	0.376002	0.376137	0.376434	0.376442	0.376137	0.376464	0.376858	0.376457	0.375973	0.376136	0.376648	0.376813	0.37668	0.376792
3	0.402296	0.402109	0.402402	0.402595	0.402324	0.402344	0.403198	0.404252	0.404622	0.404043	0.403174	0.402795	0.403044	0.403572	0.403614	0.402984	0.402815	0.403499	0.40434	0.404884	0.404774	0.40411	0.403563	0.403442	0.403609	0.404226	0.405269	0.405881	0.40563	0.405195	0.404944	0.404553	0.404144	0.404191	0.404605	0.404878	0.404989	0.405185	0.405454	0.405812	0.406292	0.406546	0.406355	0.406097	0.405973	0.406002	0.406197	0.406438	0.406517
3	0.367415	0.367372	0.3676	0.367558	0.367586	0.367811	0.36787	0.368232	0.368723	0.368557	0.368194	0.368289	0.368486	0.368542	0.368405	0.36803	0.367946	0.368324	0.368758	0.369078	0.369032	0.368458	0.367999	0.367934	0.368035	0.368616	0.369417	0.369517	0.369325	0.369682	0.369831	0.369308	0.369074	0.369321	0.36967	0.370192	0.370425	0.370036	0.369591	0.369497	0.369782	0.370229	0.370444	0.370407	0.370335	0.370347	0.37042	0.370458	0.370417
3	0.400193	0.399592	0.399624	0.399792	0.39959	0.3997	0.400265	0.400577	0.400605	0.400536	0.400539	0.400653	0.400724	0.401148	0.40165	0.401145	0.400321	0.400613	0.40178	0.402528	0.402175	0.401386	0.401062	0.401008	0.400636	0.40046	0.40119	0.402054	0.402209	0.402147	0.401975	0.401631	0.401697	0.401993	0.402202	0.402452	0.402668	0.402725	0.40263	0.402573	0.402869	0.403357	0.403353	0.402851	0.402381	0.402096	0.402224	0.402726	0.402923
3	0.368704	0.368408	0.368542	0.368927	0.369162	0.369367	0.370103	0.371052	0.371235	0.370768	0.370214	0.36989	0.370007	0.370275	0.370426	0.370286	0.370105	0.370523	0.371381	0.371807	0.371155	0.370283	0.3705	0.371146	0.371028	0.370689	0.371279	0.372271	0.372576	0.372455	0.372288	0.371985	0.371723	0.371755	0.372009	0.372187	0.372335	0.372669	0.372719	0.372407	0.372696	0.373489	0.373655	0.373054	0.37237	0.372007	0.372002	0.372546	0.373435
3	0.354896	0.354405	0.354739	0.355339	0.355483	0.355608	0.356082	0.356399	0.356228	0.355916	0.355696	0.355646	0.356027	0.356776	0.357109	0.356595	0.356034	0.356045	0.356513	0.357075	0.357091	0.356538	0.356423	0.356956	0.357071	0.356766	0.356999	0.357473	0.357654	0.357858	0.357694	0.357008	0.35684	0.357286	0.357725	0.357823	0.357579	0.357541	0.357782	0.358149	0.358847	0.359301	0.358756	0.357914	0.357722	0.358071	0.358591	0.35906	0.359186
3	0.402287	0.402239	0.402518	0.402927	0.402995	0.402758	0.402778	0.403101	0.403117	0.402868	0.402922	0.403092	0.403474	0.404171	0.404215	0.403511	0.403021	0.403058	0.403615	0.404329	0.404308	0.403535	0.403105	0.403348	0.403629	0.403991	0.404707	0.405253	0.405292	0.405289	0.405164	0.404558	0.404081	0.40419	0.404715	0.405281	0.405562	0.405498	0.404944	0.404462	0.405081	0.406089	0.406307	0.406165	0.405915	0.405476	0.405366	0.405781	0.406128
3	0.355294	0.355312	0.355971	0.356383	0.356036	0.35573	0.356167	0.356519	0.356291	0.356307	0.356917	0.357442	0.357485	0.357487	0.35745	0.356995	0.356608	0.356712	0.357188	0.357631	0.357387	0.35662	0.356559	0.357388	0.357916	0.357898	0.358075	0.358561	0.358816	0.358579	0.357968	0.357393	0.35739	0.357928	0.358594	0.358958	0.358815	0.358291	0.357836	0.358236	0.359461	0.360209	0.359743	0.358918	0.358428	0.35821	0.358443	0.359047	0.359402
3	0.379569	0.379359	0.379281	0.379241	0.37915	0.37939	0.379926	0.380291	0.3802	0.379948	0.379914	0.380139	0.380458	0.380799	0.381101	0.381027	0.380853	0.381277	0.381868	0.381542	0.38035	0.379441	0.379519	0.380015	0.380257	0.380527	0.381165	0.381785	0.382035	0.382176	0.382172	0.381686	0.381142	0.38111	0.381593	0.382011	0.38211	0.38243	0.382671	0.382502	0.382495	0.382682	0.382806	0.382806	0.38256	0.382227	0.382238	0.382528	0.382696
3	0.388524	0.388211	0.38828	0.388421	0.388497	0.388909	0.389866	0.390552	0.390494	0.39025	0.389805	0.389264	0.389046	0.389191	0.389351	0.389015	0.388917	0.389715	0.39072	0.391122	0.390594	0.389815	0.389573	0.389507	0.38934	0.389407	0.389737	0.390038	0.390302	0.390353	0.389917	0.389544	0.389562	0.389765	0.390261	0.39093	0.391295	0.391269	0.390957	0.390595	0.390882	0.391529	0.391468	0.390789	0.390231	0.39029	0.390747	0.390992	0.391093
3	0.270305	0.270811	0.270933	0.270317	0.269591	0.269406	0.270023	0.270859	0.271235	0.271219	0.271169	0.271333	0.271536	0.271432	0.271208	0.271281	0.271398	0.271284	0.271216	0.271383	0.271576	0.271628	0.271659	0.271601	0.271538	0.271654	0.271848	0.271895	0.271816	0.271811	0.271681	0.271639	0.272149	0.272802	0.272996	0.272902	0.272985	0.273219	0.273494	0.274098	0.274845	0.275157	0.27517	0.274995	0.274587	0.274173	0.27383	0.273937	0.274517
3	0.283045	0.283204	0.2829	0.282483	0.282314	0.282156	0.282619	0.283454	0.283409	0.282897	0.282952	0.283257	0.283304	0.283424	0.283472	0.283174	0.282849	0.28269	0.28286	0.283315	0.283679	0.283771	0.283655	0.283445	0.283323	0.283396	0.283626	0.283701	0.28363	0.283633	0.283578	0.283958	0.284917	0.285405	0.28517	0.285143	0.285613	0.28594	0.286013	0.28651	0.287254	0.287476	0.287485	0.287356	0.286991	0.28696	0.28697	0.286837	0.286975
3	0.262974	0.263198	0.263125	0.263157	0.263339	0.263137	0.263086	0.263195	0.262896	0.262594	0.262752	0.263093	0.26321	0.263175	0.263054	0.262798	0.262481	0.262415	0.262812	0.263474	0.264025	0.264031	0.263605	0.26316	0.263103	0.263565	0.264013	0.264028	0.263811	0.263484	0.263138	0.263612	0.264849	0.265327	0.264821	0.264642	0.265265	0.265935	0.266163	0.266463	0.266941	0.26713	0.267312	0.267372	0.266828	0.26627	0.266191	0.266483	0.267009
3	0.282219	0.282636	0.282668	0.28236	0.282135	0.281975	0.282016	0.282152	0.28206	0.281993	0.282246	0.282429	0.282483	0.282818	0.283091	0.283038	0.282968	0.28291	0.283073	0.283594	0.283686	0.283089	0.282611	0.282369	0.282226	0.282574	0.283184	0.283259	0.283191	0.283521	0.283625	0.283825	0.284546	0.284746	0.284175	0.283974	0.28462	0.28536	0.285728	0.286152	0.286615	0.286804	0.286962	0.286856	0.286362	0.286108	0.286076	0.28616	0.286544
3	0.285313	0.285595	0.285193	0.284717	0.284385	0.284319	0.284803	0.285224	0.284999	0.28464	0.284823	0.285205	0.285302	0.285334	0.285354	0.285226	0.284947	0.284931	0.285504	0.286026	0.285971	0.285872	0.286313	0.286741	0.286488	0.285968	0.285783	0.285667	0.285617	0.286037	0.286295	0.286415	0.287054	0.287483	0.287246	0.287106	0.287373	0.287735	0.288178	0.288773	0.289241	0.289464	0.289682	0.289663	0.289146	0.288599	0.288348	0.288323	0.288595
3	0.284137	0.284266	0.28413	0.28391	0.283796	0.283671	0.283918	0.284073	0.283519	0.28314	0.283533	0.284012	0.284197	0.284391	0.284457	0.284341	0.28424	0.284234	0.284503	0.284893	0.285114	0.2851	0.285044	0.285031	0.284922	0.28479	0.284977	0.285448	0.285773	0.285768	0.285629	0.285976	0.286728	0.286911	0.286375	0.286244	0.286898	0.287402	0.287446	0.287712	0.2884	0.288923	0.288999	0.288664	0.288354	0.288258	0.287912	0.287733	0.288292
3	0.27913	0.279796	0.279625	0.278952	0.278793	0.279037	0.279515	0.28005	0.280174	0.279915	0.279793	0.280024	0.280277	0.280395	0.280339	0.280105	0.280002	0.280281	0.280724	0.280897	0.28072	0.280394	0.280183	0.280209	0.280419	0.280543	0.280572	0.280633	0.280639	0.280707	0.280805	0.28119	0.281939	0.282326	0.282202	0.282027	0.282127	0.282502	0.282891	0.283426	0.284064	0.284344	0.284386	0.284178	0.283762	0.283598	0.283501	0.283562	0.284017
3	0.275487	0.275577	0.27527	0.274784	0.274564	0.274666	0.275022	0.275251	0.27509	0.274984	0.275264	0.275561	0.275478	0.275347	0.275451	0.275596	0.275721	0.275915	0.276216	0.276451	0.276461	0.276445	0.276513	0.276188	0.275593	0.27561	0.276201	0.276496	0.276357	0.276195	0.276161	0.276617	0.277391	0.277864	0.277914	0.277928	0.278436	0.278978	0.27904	0.279242	0.27959	0.279466	0.279261	0.279271	0.279346	0.279511	0.279505	0.279552	0.279897
3	0.273755	0.273952	0.273974	0.273911	0.273765	0.27349	0.273572	0.273806	0.273753	0.273832	0.274316	0.274521	0.27423	0.274275	0.274517	0.274274	0.273975	0.274112	0.274458	0.27459	0.274487	0.274499	0.274613	0.27452	0.274396	0.27463	0.275116	0.275354	0.275353	0.275389	0.275424	0.275869	0.276571	0.276574	0.276183	0.276331	0.276835	0.276998	0.276983	0.277512	0.278442	0.279097	0.27927	0.278848	0.27825	0.278209	0.278257	0.278097	0.278278
3	0.267102	0.267002	0.267019	0.267189	0.267104	0.266566	0.266411	0.266816	0.26697	0.266945	0.267144	0.267287	0.267216	0.267217	0.267355	0.267485	0.26756	0.267659	0.267846	0.267856	0.267772	0.267917	0.268177	0.268131	0.267824	0.267778	0.268102	0.268453	0.268685	0.268772	0.268576	0.268684	0.269199	0.269164	0.268715	0.269	0.27009	0.270904	0.271016	0.271153	0.271624	0.271813	0.271685	0.271557	0.27155	0.271577	0.271247	0.270989	0.271285
3	0.266714	0.267376	0.267336	0.266964	0.26678	0.266622	0.266764	0.267125	0.267026	0.266549	0.266453	0.266908	0.267219	0.267135	0.267014	0.26716	0.26738	0.267425	0.267635	0.267985	0.267968	0.267576	0.267446	0.267628	0.267653	0.267722	0.268044	0.268224	0.268118	0.267977	0.267918	0.268292	0.268976	0.269188	0.269058	0.269244	0.26962	0.269798	0.269908	0.270496	0.27132	0.27158	0.271638	0.27165	0.271338	0.271152	0.271097	0.270961	0.270984
3	0.28514	0.285534	0.285417	0.285072	0.284807	0.284794	0.285401	0.285976	0.285759	0.285369	0.285567	0.285897	0.285898	0.285951	0.285899	0.285645	0.285624	0.285768	0.286048	0.286378	0.286428	0.286346	0.286362	0.286361	0.286414	0.286457	0.286383	0.286323	0.286354	0.286489	0.286631	0.286898	0.287156	0.287068	0.286899	0.286966	0.287173	0.287487	0.287855	0.288338	0.289019	0.289495	0.289711	0.289738	0.289604	0.289618	0.289579	0.289566	0.289888
3	0.259262	0.259374	0.259637	0.259622	0.259288	0.258724	0.258518	0.25896	0.259371	0.259368	0.259525	0.259804	0.259849	0.260116	0.260267	0.25992	0.259772	0.260131	0.260697	0.260997	0.260796	0.260512	0.260527	0.260572	0.260557	0.260674	0.260866	0.260812	0.260678	0.260794	0.260896	0.261287	0.261915	0.261873	0.26141	0.261384	0.261805	0.262414	0.26298	0.263353	0.263689	0.264107	0.264524	0.26448	0.263987	0.263648	0.263373	0.263214	0.263623
3	0.259884	0.260243	0.260296	0.26032	0.260524	0.260651	0.26081	0.260666	0.260037	0.259775	0.260013	0.260158	0.260292	0.260691	0.260888	0.260551	0.260234	0.26034	0.260729	0.26103	0.261146	0.261259	0.261329	0.261229	0.260952	0.260745	0.261062	0.261633	0.261908	0.261964	0.261941	0.262287	0.263078	0.263385	0.262967	0.262694	0.262988	0.263435	0.263705	0.263967	0.264301	0.264535	0.264817	0.264965	0.264772	0.264572	0.264343	0.264251	0.264681
3	0.267923	0.268144	0.268066	0.267942	0.267879	0.267726	0.267967	0.268394	0.268316	0.268189	0.26848	0.268676	0.268747	0.2692	0.269502	0.269272	0.269033	0.26887	0.268921	0.269289	0.269531	0.269475	0.26933	0.269257	0.269311	0.269361	0.26949	0.269826	0.270088	0.27002	0.269726	0.270023	0.271003	0.271563	0.271297	0.270854	0.271141	0.272036	0.27254	0.272709	0.273114	0.273459	0.273675	0.273786	0.273678	0.273566	0.27326	0.272955	0.273127
3	0.278081	0.278672	0.278668	0.278581	0.278529	0.278112	0.277881	0.278028	0.277981	0.277658	0.277638	0.278062	0.278566	0.278963	0.279047	0.278728	0.278298	0.278264	0.27881	0.279313	0.279352	0.27925	0.279089	0.278795	0.27879	0.279175	0.279502	0.279455	0.279231	0.279228	0.279394	0.279719	0.280218	0.28057	0.280619	0.28069	0.280917	0.281211	0.281642	0.282046	0.282221	0.282278	0.28247	0.282536	0.282379	0.28239	0.282146	0.281647	0.281668
3	0.261224	0.261475	0.261338	0.26109	0.260907	0.260896	0.261495	0.262186	0.262118	0.26175	0.261642	0.261476	0.261366	0.261679	0.261928	0.26182	0.261697	0.261761	0.262124	0.262541	0.262577	0.262461	0.262434	0.262169	0.26179	0.261811	0.262252	0.262552	0.262615	0.262726	0.262671	0.262887	0.263652	0.264095	0.2638	0.263474	0.263877	0.264605	0.264952	0.265135	0.265374	0.265566	0.265895	0.266164	0.26592	0.265344	0.264741	0.264663	0.265291
3	0.260893	0.261075	0.260797	0.260726	0.260832	0.260523	0.260512	0.260841	0.260814	0.260739	0.260991	0.261183	0.261131	0.261178	0.261308	0.26128	0.261204	0.261303	0.261504	0.261763	0.262044	0.261898	0.261598	0.261759	0.262071	0.262178	0.262256	0.262171	0.262021	0.262288	0.262498	0.262545	0.262893	0.263098	0.262966	0.263099	0.263578	0.263969	0.264138	0.264315	0.264631	0.264914	0.265396	0.265743	0.265338	0.264976	0.264945	0.264934	0.265207
3	0.27186	0.272108	0.271903	0.271807	0.271576	0.271058	0.271191	0.271531	0.271299	0.271155	0.27158	0.272054	0.272031	0.271935	0.271959	0.271916	0.272071	0.272373	0.272538	0.272548	0.272506	0.272348	0.272193	0.272093	0.272045	0.272295	0.272708	0.272897	0.272858	0.272835	0.272932	0.2733	0.273821	0.274093	0.27404	0.274206	0.274862	0.275313	0.27534	0.275536	0.275968	0.276265	0.276518	0.276605	0.276307	0.276012	0.275882	0.275933	0.276242
3	0.262578	0.263028	0.263141	0.262965	0.262782	0.262601	0.262784	0.263098	0.263099	0.263007	0.263115	0.263247	0.263387	0.263588	0.26341	0.263013	0.262937	0.263146	0.263565	0.263739	0.263443	0.263501	0.26398	0.264007	0.263713	0.263757	0.264131	0.264305	0.264115	0.263872	0.263812	0.264277	0.265041	0.265471	0.265569	0.265728	0.266039	0.26611	0.265919	0.266047	0.266543	0.266899	0.267066	0.267058	0.266869	0.266845	0.266957	0.267224	0.267677
3	0.278549	0.278741	0.278377	0.277913	0.277803	0.27802	0.278463	0.278739	0.278645	0.278663	0.278956	0.278882	0.278606	0.278873	0.278943	0.278419	0.278359	0.279082	0.279936	0.280294	0.280145	0.279926	0.279826	0.279601	0.279219	0.279162	0.279653	0.280012	0.279869	0.27971	0.279795	0.280279	0.280922	0.281176	0.281111	0.281248	0.281676	0.282027	0.282254	0.282585	0.283023	0.283322	0.283419	0.28332	0.283044	0.282851	0.282667	0.282549	0.283028
3	0.274336	0.274799	0.274579	0.274493	0.274648	0.274553	0.274716	0.275195	0.275418	0.27525	0.275003	0.275006	0.275196	0.275279	0.275039	0.274831	0.275008	0.275216	0.275325	0.275343	0.275274	0.275241	0.275244	0.275241	0.275158	0.27515	0.275408	0.275657	0.275951	0.276305	0.27618	0.276164	0.276786	0.277189	0.277042	0.277052	0.277477	0.277785	0.277892	0.27835	0.279017	0.279382	0.279578	0.279323	0.278734	0.278457	0.278321	0.278384	0.278634
3	0.268515	0.268634	0.268442	0.268533	0.268731	0.26821	0.267771	0.268056	0.268317	0.268315	0.268336	0.268337	0.268481	0.26911	0.269721	0.269697	0.269372	0.26917	0.269194	0.269404	0.26964	0.269669	0.269523	0.269441	0.269478	0.269679	0.270135	0.270274	0.269822	0.269558	0.269666	0.270204	0.271033	0.271214	0.270694	0.270473	0.270939	0.271537	0.271785	0.271946	0.272447	0.272974	0.273153	0.272832	0.272315	0.27219	0.272322	0.272546	0.272799
3	0.283179	0.283619	0.283364	0.283116	0.283014	0.282727	0.282951	0.283726	0.284106	0.284016	0.284043	0.284005	0.283819	0.28384	0.283708	0.283352	0.283292	0.28355	0.284021	0.284391	0.284387	0.284211	0.284003	0.283799	0.283767	0.284076	0.284426	0.284418	0.284449	0.284724	0.284789	0.285058	0.285815	0.28622	0.285939	0.285633	0.285799	0.286239	0.28669	0.287151	0.287488	0.287701	0.287928	0.287986	0.287886	0.287684	0.287361	0.287376	0.287795
3	0.260743	0.261019	0.260694	0.260322	0.26023	0.26023	0.260442	0.260532	0.260284	0.260332	0.260831	0.261046	0.260864	0.260968	0.261137	0.260972	0.260956	0.261326	0.261709	0.261791	0.261623	0.261241	0.260801	0.260547	0.260592	0.260927	0.261335	0.261481	0.261405	0.261435	0.261686	0.262319	0.262994	0.263127	0.262843	0.262766	0.263213	0.263743	0.263964	0.264232	0.26474	0.265019	0.265064	0.265107	0.265121	0.264961	0.264481	0.264172	0.264427
3	0.26052	0.260465	0.260462	0.260449	0.260157	0.259885	0.260344	0.26105	0.261093	0.260712	0.260588	0.26061	0.260579	0.26077	0.260918	0.260872	0.260823	0.260794	0.261084	0.261413	0.261314	0.261056	0.261149	0.261434	0.261355	0.261138	0.261325	0.261567	0.2617	0.262024	0.261978	0.261925	0.262504	0.262772	0.262365	0.262354	0.263048	0.263515	0.263733	0.26447	0.265288	0.265387	0.265167	0.264889	0.264668	0.264807	0.26478	0.264658	0.265013
3	0.272008	0.272213	0.271917	0.271443	0.271	0.27079	0.271393	0.272228	0.272333	0.271966	0.271989	0.272232	0.272248	0.272633	0.273088	0.272756	0.272173	0.272084	0.27242	0.272765	0.273021	0.273129	0.273075	0.272919	0.272768	0.272812	0.273093	0.273278	0.27306	0.272756	0.272633	0.273163	0.274145	0.274437	0.274106	0.27414	0.274723	0.275317	0.275759	0.276212	0.276522	0.27648	0.276427	0.276456	0.27649	0.276577	0.276504	0.276604	0.276958
3	0.280254	0.280733	0.280631	0.280351	0.280158	0.279894	0.279957	0.280121	0.280106	0.280364	0.281028	0.281557	0.281443	0.280911	0.280394	0.280183	0.280606	0.281316	0.281642	0.281618	0.281603	0.281585	0.281491	0.281273	0.281098	0.281309	0.281919	0.282434	0.282468	0.282309	0.282306	0.282728	0.283026	0.282639	0.282262	0.282548	0.283336	0.283919	0.283907	0.283951	0.284577	0.285182	0.285366	0.285233	0.285011	0.284932	0.28486	0.28493	0.285118
3	0.273854	0.273989	0.273761	0.273485	0.273564	0.273648	0.273733	0.273953	0.273947	0.273794	0.273977	0.274192	0.27431	0.274704	0.274838	0.274494	0.274417	0.274639	0.274848	0.275031	0.275018	0.274868	0.274966	0.274928	0.274461	0.274304	0.274755	0.275184	0.275364	0.275441	0.275369	0.275774	0.276677	0.277063	0.276771	0.276499	0.276756	0.277308	0.277773	0.27834	0.278892	0.278942	0.278881	0.278892	0.278729	0.278579	0.278259	0.277981	0.2783
3	0.257656	0.257953	0.258161	0.258354	0.258468	0.258176	0.257996	0.258302	0.258541	0.258482	0.258446	0.258504	0.258427	0.258335	0.258266	0.258257	0.258477	0.258626	0.258734	0.259029	0.259257	0.259399	0.259631	0.259446	0.258871	0.258663	0.259014	0.259467	0.259657	0.259735	0.259664	0.259871	0.26062	0.261041	0.260749	0.260415	0.26074	0.26137	0.261703	0.262052	0.26243	0.26266	0.263022	0.263051	0.262745	0.262644	0.262318	0.261959	0.262214
3	0.271952	0.272331	0.272035	0.271421	0.27119	0.271147	0.271539	0.271981	0.271936	0.271909	0.272148	0.272223	0.272127	0.272245	0.272355	0.272216	0.272128	0.272256	0.272651	0.273019	0.27279	0.272366	0.272464	0.272602	0.272603	0.272846	0.27312	0.273148	0.273037	0.273081	0.273432	0.274237	0.274997	0.274939	0.274498	0.274638	0.275359	0.275964	0.276205	0.276379	0.276536	0.276525	0.27657	0.276622	0.276623	0.276672	0.276545	0.276364	0.276343
3	0.278326	0.278306	0.277812	0.2775	0.277477	0.277544	0.277971	0.278555	0.278715	0.278604	0.278471	0.278345	0.278599	0.279099	0.279206	0.278858	0.278452	0.278459	0.279039	0.279589	0.279695	0.27955	0.2795	0.279567	0.279561	0.279526	0.279638	0.279834	0.279962	0.279969	0.279755	0.279886	0.280512	0.280744	0.280473	0.280557	0.281175	0.281713	0.281935	0.282209	0.282736	0.283057	0.283036	0.282755	0.282414	0.282366	0.282497	0.282864	0.283318
3	0.279343	0.279739	0.279126	0.278515	0.278503	0.278672	0.279232	0.279866	0.279842	0.279662	0.279969	0.280295	0.280217	0.280045	0.279957	0.279877	0.279836	0.279855	0.280103	0.28046	0.280684	0.280845	0.280886	0.280574	0.280125	0.280029	0.280328	0.280522	0.28069	0.281077	0.280924	0.280705	0.281358	0.281856	0.281449	0.281317	0.282074	0.282632	0.282631	0.282755	0.283058	0.283208	0.283448	0.283788	0.283926	0.284011	0.28392	0.283679	0.283787
3	0.262408	0.26289	0.262624	0.262264	0.262281	0.262303	0.262418	0.262748	0.262803	0.262486	0.262297	0.262302	0.262452	0.262783	0.262952	0.262825	0.262663	0.262782	0.263339	0.263761	0.263626	0.26341	0.263383	0.263245	0.263105	0.263177	0.263181	0.263004	0.263118	0.26356	0.263665	0.263964	0.264906	0.265285	0.264805	0.264708	0.265305	0.265769	0.265806	0.266053	0.266648	0.266883	0.26691	0.266869	0.266567	0.266514	0.266558	0.266438	0.266667
3	0.264503	0.265191	0.265553	0.265252	0.264439	0.26373	0.264068	0.265062	0.26551	0.265396	0.265532	0.265755	0.265685	0.265645	0.26552	0.265229	0.265168	0.265285	0.265452	0.265739	0.265898	0.265823	0.265718	0.265349	0.264977	0.265258	0.2658	0.265921	0.265864	0.2661	0.266366	0.266711	0.267284	0.267497	0.26727	0.267357	0.267936	0.268461	0.268739	0.269085	0.269493	0.269536	0.269537	0.269745	0.269867	0.269912	0.269636	0.269372	0.269799
3	0.253855	0.254376	0.254507	0.254173	0.253893	0.253929	0.254484	0.254956	0.254723	0.254366	0.254541	0.254899	0.255075	0.255236	0.25543	0.255613	0.255707	0.255583	0.255511	0.255677	0.255934	0.256112	0.256095	0.255918	0.255783	0.255894	0.256153	0.256049	0.255666	0.255504	0.255445	0.25584	0.256793	0.257375	0.257314	0.257187	0.257226	0.257353	0.257611	0.257955	0.258378	0.258815	0.259152	0.259204	0.259066	0.258995	0.258676	0.258238	0.258222
3	0.251045	0.251145	0.250694	0.250546	0.250855	0.250787	0.25073	0.251224	0.251636	0.251634	0.251776	0.25206	0.252061	0.251923	0.251707	0.251508	0.251499	0.251524	0.251645	0.25186	0.251984	0.251988	0.252027	0.252047	0.251926	0.251765	0.251808	0.252158	0.252607	0.252816	0.252607	0.252679	0.253285	0.253664	0.253534	0.253401	0.253847	0.254531	0.254843	0.255142	0.255666	0.255871	0.255845	0.255841	0.255663	0.255534	0.255507	0.255399	0.255417
3	0.27509	0.275022	0.274703	0.274513	0.274577	0.274843	0.275296	0.275425	0.275147	0.275072	0.275301	0.275347	0.275205	0.275258	0.27528	0.275125	0.275159	0.275438	0.27591	0.276436	0.276531	0.276087	0.275661	0.275454	0.275535	0.276017	0.276578	0.276843	0.276937	0.27702	0.276909	0.277154	0.277872	0.278043	0.277659	0.277738	0.278317	0.27872	0.278844	0.279001	0.279284	0.279511	0.279762	0.279848	0.27965	0.279561	0.279456	0.279321	0.279494
3	0.260636	0.260979	0.260726	0.260434	0.260307	0.260137	0.260432	0.26101	0.260964	0.260697	0.261003	0.261213	0.260967	0.261115	0.261603	0.26168	0.261375	0.261205	0.261551	0.262119	0.262357	0.26226	0.262092	0.261822	0.261521	0.261491	0.261855	0.262306	0.26245	0.26229	0.261946	0.262028	0.262762	0.263232	0.26303	0.263046	0.263846	0.264528	0.264435	0.264459	0.265035	0.265489	0.265667	0.265319	0.264576	0.264523	0.265048	0.265398	0.265682
3	0.266014	0.266493	0.26672	0.266643	0.266022	0.265273	0.265356	0.265964	0.266231	0.266144	0.266178	0.266367	0.266334	0.266361	0.266628	0.266688	0.266525	0.266538	0.266959	0.267287	0.267185	0.267155	0.267414	0.26742	0.267041	0.266896	0.267196	0.267431	0.26747	0.267459	0.267235	0.267364	0.268054	0.268431	0.268218	0.268105	0.268618	0.269398	0.269981	0.270552	0.271065	0.271038	0.270754	0.270512	0.270323	0.270398	0.270489	0.270517	0.270771
4	0.346796	0.346422	0.346366	0.346488	0.346636	0.346798	0.347077	0.347543	0.347648	0.347423	0.347467	0.347637	0.347294	0.346808	0.346882	0.347218	0.347305	0.347273	0.347644	0.348255	0.348201	0.347476	0.347023	0.347169	0.347701	0.348292	0.348563	0.348435	0.348374	0.348617	0.348469	0.347984	0.348145	0.349028	0.349914	0.349913	0.349106	0.348694	0.348885	0.349124	0.349323	0.349653	0.350071	0.350333	0.350485	0.350573	0.350244	0.349719	0.349928
4	0.332002	0.3318	0.33106	0.330629	0.330918	0.331459	0.331922	0.332143	0.331911	0.331768	0.33194	0.331817	0.331359	0.331264	0.331557	0.331933	0.332194	0.332213	0.332256	0.332279	0.331844	0.33145	0.331645	0.331853	0.332159	0.332742	0.33307	0.332915	0.332871	0.33344	0.333644	0.333121	0.332872	0.333279	0.333967	0.334324	0.334338	0.334278	0.333909	0.333642	0.333845	0.334125	0.334322	0.334286	0.334069	0.334035	0.334086	0.334182	0.334548
4	0.356263	0.356235	0.355578	0.354854	0.354574	0.35462	0.355006	0.355569	0.355759	0.356006	0.356544	0.356803	0.356524	0.355982	0.355468	0.355331	0.355658	0.355897	0.356182	0.356878	0.357113	0.356739	0.356611	0.3568	0.357282	0.35757	0.357155	0.356665	0.356583	0.356929	0.357323	0.357414	0.357489	0.357762	0.358147	0.35825	0.358015	0.357703	0.357295	0.357115	0.357345	0.357965	0.358722	0.359073	0.359042	0.358865	0.358572	0.358351	0.358465
4	0.339624	0.339871	0.339396	0.338742	0.33844	0.338288	0.338489	0.339089	0.339401	0.339326	0.339359	0.339598	0.339522	0.33924	0.339304	0.339502	0.339553	0.339619	0.339947	0.340476	0.340409	0.339686	0.339429	0.339852	0.340402	0.340881	0.341135	0.340911	0.340603	0.340711	0.340712	0.340409	0.340447	0.341001	0.341495	0.341569	0.341826	0.342256	0.342081	0.34147	0.341075	0.341206	0.341585	0.341753	0.341724	0.341826	0.341981	0.342136	0.342528
4	0.296736	0.296858	0.296595	0.295792	0.295426	0.29602	0.296621	0.296635	0.296512	0.296505	0.296538	0.296685	0.297013	0.297554	0.298283	0.2987	0.298431	0.2978	0.29748	0.297764	0.298051	0.29788	0.297558	0.297367	0.29743	0.29764	0.297627	0.297764	0.298385	0.298565	0.297902	0.297537	0.298018	0.298402	0.298357	0.298453	0.298895	0.299306	0.299351	0.299701	0.30049	0.300715	0.300336	0.300352	0.301205	0.301987	0.302061	0.30192	0.30205
4	0.315743	0.31591	0.315658	0.315257	0.315223	0.315452	0.315486	0.315339	0.315019	0.314601	0.31461	0.315136	0.315862	0.316626	0.317264	0.317228	0.316432	0.315596	0.315261	0.315558	0.316087	0.316309	0.316317	0.316424	0.316669	0.316777	0.316428	0.316211	0.316764	0.317245	0.316931	0.316732	0.317028	0.317265	0.317627	0.317894	0.31791	0.31792	0.317649	0.317774	0.318785	0.319519	0.319335	0.319232	0.319982	0.320679	0.320463	0.319985	0.320264
4	0.298443	0.298661	0.298868	0.29875	0.298476	0.298375	0.29846	0.298415	0.298116	0.297795	0.297715	0.298114	0.298909	0.299529	0.299732	0.299594	0.299135	0.298528	0.298345	0.29897	0.299586	0.299589	0.299542	0.299717	0.299777	0.299532	0.299098	0.298841	0.298986	0.299097	0.298743	0.29842	0.298798	0.299628	0.300215	0.300205	0.300008	0.300089	0.300208	0.300604	0.301414	0.301795	0.301578	0.301438	0.301666	0.30182	0.301588	0.30154	0.302163
4	0.313921	0.31412	0.313985	0.313143	0.312418	0.312784	0.313749	0.31429	0.314125	0.313745	0.313678	0.314124	0.314862	0.315332	0.315513	0.315488	0.315028	0.314521	0.314528	0.314988	0.315332	0.315217	0.315061	0.315194	0.315427	0.315492	0.315192	0.315033	0.315556	0.315913	0.31541	0.315181	0.315881	0.316208	0.315906	0.316043	0.316478	0.316403	0.316032	0.316337	0.317196	0.317756	0.317947	0.318153	0.318706	0.319103	0.318631	0.317951	0.318089
4	0.315684	0.316168	0.316508	0.316207	0.315747	0.31579	0.316101	0.316239	0.316289	0.316398	0.316515	0.316713	0.31708	0.317467	0.317925	0.31811	0.317548	0.316815	0.316612	0.316997	0.317478	0.317571	0.317486	0.317453	0.317513	0.317559	0.317327	0.317271	0.317763	0.318163	0.318003	0.317861	0.318236	0.318609	0.318615	0.318504	0.3186	0.318848	0.318941	0.319272	0.320116	0.320831	0.320985	0.321005	0.321349	0.321536	0.320996	0.320408	0.320752
4	0.32494	0.324999	0.324733	0.324213	0.323793	0.324102	0.324597	0.324344	0.323705	0.323455	0.323655	0.324135	0.324725	0.325369	0.325987	0.326193	0.325817	0.32534	0.325138	0.325042	0.324945	0.324837	0.324748	0.324727	0.324862	0.325151	0.325355	0.325661	0.326158	0.326211	0.325697	0.325503	0.326032	0.326466	0.326384	0.326368	0.326668	0.326981	0.32723	0.327711	0.328284	0.328514	0.328392	0.328333	0.328885	0.32936	0.328868	0.328319	0.328633
4	0.330758	0.330897	0.331067	0.330927	0.330643	0.330665	0.330902	0.330932	0.330613	0.330438	0.330647	0.331074	0.331791	0.332407	0.332397	0.332167	0.331958	0.331429	0.331134	0.331654	0.332231	0.33214	0.3319	0.332009	0.332234	0.332398	0.332377	0.33226	0.332444	0.332765	0.332731	0.332694	0.332939	0.333125	0.333163	0.333021	0.332979	0.333216	0.33349	0.334106	0.334991	0.335314	0.335039	0.334964	0.335512	0.335932	0.335569	0.335101	0.335294
4	0.305289	0.305293	0.305216	0.305017	0.304687	0.304505	0.304561	0.304573	0.304125	0.303676	0.303927	0.304593	0.305126	0.305515	0.305861	0.30577	0.305296	0.304946	0.304777	0.304971	0.305378	0.305348	0.305056	0.305078	0.305397	0.305656	0.305746	0.305939	0.306209	0.306182	0.305756	0.305375	0.305542	0.305859	0.305947	0.306026	0.30597	0.30571	0.305735	0.30661	0.308024	0.308723	0.308304	0.307784	0.307933	0.308247	0.308171	0.30814	0.308545
4	0.315939	0.316088	0.316381	0.316375	0.316011	0.315878	0.316113	0.316177	0.315635	0.315171	0.315351	0.315745	0.316236	0.316722	0.316919	0.31682	0.316446	0.31597	0.315771	0.316209	0.316946	0.31717	0.317038	0.316937	0.316813	0.31679	0.3166	0.316245	0.316332	0.316731	0.316802	0.316646	0.316817	0.317137	0.317194	0.317125	0.317284	0.31754	0.31758	0.31791	0.318459	0.31846	0.318337	0.318852	0.319928	0.320593	0.320171	0.319499	0.319629
4	0.315078	0.314834	0.314852	0.314809	0.31451	0.314368	0.314512	0.314342	0.313811	0.313686	0.314164	0.314882	0.315576	0.316076	0.316389	0.316329	0.315742	0.315121	0.314969	0.315323	0.315756	0.315877	0.315975	0.316112	0.316237	0.316594	0.316728	0.316647	0.316837	0.316779	0.31625	0.316027	0.316414	0.316744	0.316804	0.31687	0.317003	0.317247	0.317388	0.317746	0.318786	0.319676	0.3196	0.319173	0.319311	0.319654	0.319579	0.319546	0.319996
4	0.318649	0.319041	0.318755	0.318254	0.318232	0.318579	0.31886	0.31872	0.318394	0.318343	0.318504	0.318832	0.319215	0.319633	0.320263	0.32034	0.319445	0.318609	0.318638	0.319137	0.319292	0.319373	0.319863	0.320072	0.319731	0.31938	0.319165	0.319228	0.319628	0.31961	0.318907	0.318758	0.319542	0.320077	0.320183	0.320178	0.319911	0.3198	0.320079	0.320704	0.321731	0.32255	0.322569	0.322419	0.322859	0.323197	0.322761	0.322182	0.322301
4	0.311918	0.311898	0.311937	0.311898	0.311866	0.311984	0.312191	0.312196	0.311767	0.31145	0.311909	0.312858	0.313603	0.31388	0.313952	0.313976	0.313757	0.313228	0.312803	0.312799	0.312772	0.312671	0.312951	0.313192	0.313051	0.313007	0.31311	0.313317	0.313808	0.314055	0.313741	0.313664	0.314131	0.314275	0.314096	0.314326	0.314745	0.314831	0.314654	0.315057	0.31625	0.316887	0.316233	0.315478	0.315945	0.316895	0.316966	0.316568	0.316814
4	0.312143	0.312237	0.312281	0.31174	0.311258	0.31188	0.312829	0.31289	0.312225	0.311534	0.311258	0.31159	0.312335	0.313207	0.313937	0.314044	0.313343	0.312415	0.312159	0.312722	0.313175	0.312923	0.312513	0.312482	0.312849	0.313288	0.313345	0.313285	0.31374	0.314081	0.313569	0.313063	0.313081	0.313205	0.313361	0.313614	0.314013	0.314402	0.314553	0.314823	0.315442	0.315973	0.316108	0.316133	0.316454	0.316676	0.316381	0.316081	0.316239
4	0.292916	0.292907	0.292671	0.292318	0.292162	0.292421	0.292886	0.293018	0.292679	0.292398	0.292419	0.292754	0.293457	0.294012	0.294195	0.294374	0.294355	0.293731	0.293124	0.293318	0.293779	0.293927	0.294062	0.29422	0.294195	0.29404	0.293779	0.293696	0.293886	0.293821	0.293374	0.293274	0.293811	0.294256	0.294458	0.294597	0.29472	0.294879	0.295014	0.29576	0.296927	0.297261	0.296681	0.296275	0.296745	0.29737	0.297124	0.296469	0.296628
4	0.311382	0.311386	0.311122	0.310691	0.310317	0.310637	0.311185	0.311066	0.310637	0.310397	0.310401	0.310602	0.311005	0.311512	0.311827	0.31172	0.311168	0.310662	0.310948	0.311824	0.312014	0.31137	0.311042	0.311232	0.311424	0.311411	0.311281	0.311483	0.312129	0.312367	0.311679	0.311169	0.311742	0.312456	0.312674	0.3128	0.313049	0.313207	0.313034	0.313236	0.313951	0.31432	0.314346	0.314572	0.315177	0.315422	0.314912	0.314463	0.314667
4	0.308948	0.308912	0.308831	0.308714	0.308642	0.30872	0.308913	0.308844	0.308486	0.308432	0.308987	0.309902	0.310635	0.310932	0.311065	0.310964	0.310459	0.309942	0.309777	0.309995	0.310252	0.310216	0.309965	0.309523	0.309375	0.309736	0.309891	0.310048	0.310726	0.311292	0.311195	0.310958	0.311049	0.311109	0.311008	0.311159	0.311676	0.311943	0.311769	0.312188	0.313199	0.313506	0.31315	0.313193	0.313875	0.314201	0.313731	0.313352	0.313677
4	0.317437	0.317338	0.317374	0.317072	0.3168	0.31709	0.317379	0.317191	0.316754	0.316514	0.316766	0.317469	0.318328	0.318871	0.318925	0.31867	0.318251	0.317893	0.317916	0.318366	0.318697	0.318549	0.318288	0.31803	0.317919	0.318034	0.317826	0.317519	0.317905	0.318412	0.318199	0.318157	0.318836	0.319364	0.319505	0.319459	0.319275	0.319149	0.319296	0.320074	0.321133	0.321491	0.321069	0.320815	0.321334	0.321841	0.32165	0.321362	0.321604
4	0.315362	0.315428	0.315558	0.315432	0.315444	0.315967	0.316518	0.316323	0.315618	0.315295	0.315587	0.316108	0.316548	0.316935	0.317382	0.317438	0.31677	0.316007	0.315859	0.316282	0.31659	0.316427	0.316242	0.316274	0.316345	0.316385	0.316288	0.316473	0.31734	0.317802	0.317033	0.316306	0.316626	0.31713	0.317152	0.317054	0.31738	0.317836	0.317781	0.31796	0.318883	0.319573	0.319423	0.31903	0.319409	0.320142	0.319957	0.319449	0.319809
4	0.328927	0.328834	0.32876	0.32863	0.328407	0.32829	0.328399	0.328378	0.328023	0.327846	0.328335	0.329295	0.330046	0.330181	0.330179	0.33021	0.329776	0.329021	0.328727	0.329107	0.329479	0.329381	0.329154	0.32914	0.329273	0.329255	0.32906	0.329272	0.329845	0.329943	0.329707	0.329886	0.330289	0.330417	0.330494	0.330625	0.330661	0.330533	0.330233	0.330571	0.331636	0.33234	0.332513	0.332673	0.333299	0.334003	0.333825	0.333006	0.332679
4	0.305764	0.305611	0.305473	0.305067	0.304744	0.305131	0.305662	0.305444	0.30467	0.304457	0.305101	0.305935	0.306781	0.307417	0.307487	0.307217	0.306813	0.30617	0.305759	0.306	0.30628	0.306182	0.306197	0.30645	0.306632	0.306868	0.306952	0.306893	0.307098	0.306984	0.306386	0.306311	0.306824	0.307088	0.307092	0.307088	0.307165	0.307469	0.307779	0.308318	0.309124	0.309349	0.309145	0.309384	0.310115	0.310498	0.30988	0.309046	0.309168
4	0.308571	0.308622	0.308549	0.308059	0.30755	0.307749	0.30834	0.308539	0.308262	0.308045	0.308129	0.308419	0.309103	0.309902	0.310308	0.310152	0.309426	0.308595	0.308554	0.309332	0.309826	0.309772	0.309524	0.309069	0.30893	0.309299	0.309406	0.309296	0.309585	0.309917	0.309727	0.309437	0.309493	0.309567	0.309713	0.310079	0.310486	0.310772	0.310834	0.311325	0.312283	0.31259	0.312146	0.311958	0.3126	0.313369	0.313177	0.312452	0.312406
4	0.308179	0.308105	0.307729	0.307266	0.307179	0.307677	0.30813	0.308039	0.307655	0.307299	0.307181	0.307599	0.30854	0.309431	0.309722	0.309207	0.30822	0.307696	0.3081	0.308887	0.309336	0.309192	0.308856	0.308766	0.308928	0.309133	0.309001	0.308746	0.308903	0.30912	0.308964	0.30889	0.309258	0.309604	0.309695	0.309821	0.310008	0.310062	0.310034	0.310485	0.311356	0.311851	0.311884	0.311992	0.312491	0.312739	0.312209	0.311705	0.312074
4	0.317475	0.31748	0.317758	0.317756	0.317406	0.317394	0.317511	0.317495	0.317445	0.31734	0.317371	0.317558	0.317811	0.31817	0.318608	0.318838	0.318492	0.317907	0.317877	0.318342	0.318682	0.318642	0.318184	0.317737	0.31784	0.318027	0.317836	0.317886	0.318587	0.318983	0.31848	0.318177	0.318593	0.319137	0.319471	0.319439	0.31939	0.319621	0.319869	0.320318	0.32103	0.32146	0.321418	0.321342	0.321824	0.322305	0.321945	0.321397	0.321511
4	0.317464	0.317579	0.317717	0.317436	0.316908	0.316911	0.317353	0.31742	0.31702	0.31668	0.316721	0.317298	0.318352	0.31923	0.319574	0.319448	0.318828	0.318018	0.317621	0.317926	0.318303	0.318298	0.318332	0.318493	0.318681	0.318864	0.31867	0.318497	0.319057	0.319569	0.319306	0.318993	0.319139	0.319308	0.319295	0.319216	0.319037	0.31886	0.318908	0.319644	0.320706	0.321042	0.32091	0.321097	0.321802	0.322353	0.322089	0.32174	0.321801
4	0.314407	0.314421	0.31424	0.31387	0.313679	0.313875	0.313999	0.313823	0.313659	0.31393	0.314518	0.314828	0.314859	0.315067	0.315547	0.315838	0.315618	0.315097	0.314734	0.314909	0.315343	0.315449	0.315207	0.314958	0.314952	0.315017	0.314887	0.315072	0.315883	0.316377	0.316029	0.31576	0.315998	0.316063	0.316061	0.316222	0.316117	0.315928	0.31599	0.316587	0.317665	0.318369	0.318307	0.318035	0.318321	0.31881	0.318577	0.318138	0.318453
4	0.302716	0.303007	0.302926	0.302533	0.3022	0.302322	0.302872	0.3032	0.302895	0.302424	0.302266	0.302574	0.303273	0.303906	0.304326	0.304564	0.304249	0.303616	0.303627	0.304384	0.304829	0.304335	0.303749	0.303773	0.30395	0.303969	0.303925	0.303937	0.304257	0.304698	0.304563	0.304236	0.304654	0.305161	0.305148	0.305243	0.305576	0.305493	0.305046	0.305495	0.30676	0.307275	0.306905	0.306682	0.307108	0.307645	0.307683	0.307559	0.307744
4	0.290449	0.290561	0.290831	0.290834	0.290626	0.290721	0.291243	0.291485	0.290905	0.290292	0.290205	0.290515	0.291175	0.291907	0.292459	0.292578	0.29224	0.291765	0.291416	0.291566	0.292037	0.292115	0.291847	0.291668	0.291648	0.291709	0.291639	0.291601	0.291889	0.292005	0.291628	0.291454	0.29183	0.292164	0.292227	0.292238	0.292353	0.292473	0.292501	0.293079	0.29415	0.294645	0.294454	0.294399	0.294954	0.295473	0.295108	0.29439	0.294524
4	0.314616	0.314761	0.315049	0.315248	0.315196	0.315027	0.314903	0.314875	0.314511	0.31418	0.314663	0.315492	0.316187	0.316694	0.316768	0.316367	0.315727	0.315224	0.315203	0.315742	0.316239	0.315994	0.315553	0.315433	0.315229	0.314842	0.314602	0.314899	0.315689	0.316143	0.315878	0.315799	0.316214	0.316411	0.31644	0.31654	0.316501	0.316334	0.316289	0.316871	0.317904	0.318375	0.318006	0.317781	0.31843	0.318959	0.318738	0.318472	0.318537
4	0.308361	0.308617	0.308875	0.308496	0.307686	0.307292	0.307396	0.307679	0.307913	0.308126	0.308344	0.308403	0.308652	0.309184	0.3094	0.309209	0.308895	0.308524	0.3083	0.308514	0.308878	0.308898	0.308637	0.308502	0.308747	0.308972	0.3087	0.308476	0.308816	0.309091	0.30883	0.308659	0.308925	0.309178	0.309374	0.309507	0.309573	0.309652	0.309592	0.310137	0.311366	0.311969	0.311607	0.311242	0.311682	0.31228	0.312286	0.312084	0.312259
4	0.300736	0.301114	0.300829	0.30017	0.299661	0.299782	0.300307	0.300501	0.300387	0.300418	0.300473	0.300541	0.300904	0.301405	0.301751	0.30179	0.301413	0.300846	0.300683	0.300971	0.301051	0.300934	0.301042	0.301171	0.301147	0.300888	0.300325	0.300251	0.301105	0.301677	0.301258	0.300923	0.301336	0.301839	0.30195	0.301847	0.301942	0.302186	0.302216	0.302559	0.30348	0.303977	0.303688	0.303535	0.304057	0.304473	0.304184	0.303949	0.30435
4	0.326054	0.326373	0.326246	0.325809	0.325562	0.325564	0.325572	0.325427	0.32518	0.325342	0.326088	0.326769	0.326969	0.327184	0.327643	0.327767	0.327517	0.3272	0.326997	0.32697	0.326801	0.326569	0.326627	0.3266	0.326466	0.326794	0.327158	0.327185	0.327269	0.327266	0.326933	0.326973	0.327785	0.328519	0.328553	0.328271	0.328287	0.328313	0.327944	0.328061	0.328974	0.329604	0.329597	0.32966	0.330313	0.331005	0.330883	0.330483	0.3308
4	0.32087	0.321284	0.321092	0.320414	0.320009	0.320238	0.320569	0.320643	0.320417	0.320283	0.320535	0.320939	0.32142	0.321878	0.322118	0.322022	0.321615	0.321114	0.321155	0.321859	0.322169	0.321793	0.321491	0.321524	0.321669	0.321706	0.321493	0.321286	0.321513	0.321811	0.321609	0.321383	0.32159	0.32181	0.322061	0.322388	0.322543	0.322694	0.322899	0.323412	0.324212	0.324657	0.324562	0.324522	0.325006	0.325347	0.32503	0.324698	0.324901
4	0.31528	0.315511	0.315476	0.315336	0.315077	0.315176	0.315566	0.315504	0.314819	0.314358	0.314621	0.31539	0.316291	0.316836	0.316966	0.31678	0.316364	0.316015	0.31591	0.316112	0.316454	0.316462	0.316072	0.315718	0.315838	0.316103	0.315789	0.315601	0.316248	0.316652	0.316254	0.316104	0.316619	0.317063	0.31721	0.317227	0.317276	0.317431	0.317414	0.317644	0.318398	0.318945	0.318897	0.318804	0.319341	0.319721	0.319292	0.319028	0.319573
4	0.327561	0.327234	0.327005	0.326704	0.326631	0.326891	0.327044	0.326899	0.32649	0.326303	0.326794	0.327451	0.327871	0.328244	0.328402	0.328111	0.327552	0.327164	0.327399	0.328021	0.328257	0.328147	0.328255	0.32834	0.328253	0.328173	0.32789	0.327767	0.328205	0.328395	0.327948	0.3279	0.328567	0.328976	0.328922	0.328857	0.328923	0.329092	0.329361	0.32998	0.330751	0.331066	0.330902	0.330963	0.331721	0.332257	0.33181	0.331254	0.331433
4	0.325349	0.325705	0.325626	0.325007	0.324567	0.324737	0.32519	0.325369	0.324984	0.324302	0.323996	0.324672	0.325864	0.326597	0.326715	0.326442	0.326137	0.326054	0.326114	0.326375	0.32663	0.326543	0.326346	0.326148	0.325903	0.325678	0.325437	0.325708	0.326608	0.326976	0.326385	0.32579	0.326	0.32672	0.327089	0.32694	0.327028	0.327357	0.327394	0.327985	0.32935	0.32999	0.329489	0.328966	0.329135	0.32948	0.329254	0.328821	0.328973
4	0.312866	0.313009	0.312912	0.312653	0.312591	0.312681	0.312727	0.312723	0.312646	0.312566	0.312607	0.312722	0.313066	0.313601	0.313873	0.313625	0.312965	0.312388	0.31254	0.313306	0.313658	0.313284	0.31299	0.313121	0.313308	0.313239	0.312919	0.312982	0.313767	0.314404	0.314107	0.313673	0.314082	0.314644	0.314691	0.314542	0.314556	0.314638	0.314559	0.314823	0.315567	0.316026	0.315982	0.316065	0.316724	0.317262	0.316892	0.316318	0.316513
4	0.303357	0.30329	0.303756	0.304207	0.303841	0.30283	0.301922	0.301627	0.302051	0.3025	0.302391	0.30245	0.302902	0.303092	0.303167	0.303174	0.302774	0.302407	0.302589	0.303054	0.30314	0.303019	0.303268	0.303596	0.303722	0.303734	0.303738	0.303855	0.303988	0.30415	0.3045	0.304865	0.305008	0.305138	0.305417	0.305605	0.305682	0.305661	0.305452	0.305237	0.305149	0.305152	0.305433	0.306072	0.306676	0.307026	0.307395	0.307908	0.307835
4	0.3078	0.30824	0.308645	0.308536	0.307795	0.306936	0.306295	0.306006	0.306346	0.306873	0.306979	0.307172	0.307705	0.308034	0.308223	0.308514	0.308368	0.307737	0.307393	0.307653	0.30785	0.307523	0.30731	0.307486	0.307796	0.308032	0.307959	0.307867	0.308062	0.308534	0.309035	0.309285	0.309526	0.309935	0.310251	0.310341	0.310349	0.310224	0.309972	0.309854	0.309916	0.309957	0.31016	0.310534	0.31054	0.310491	0.310917	0.311667	0.312033
4	0.306549	0.306817	0.307365	0.307496	0.306874	0.306055	0.305368	0.304947	0.305092	0.305528	0.305788	0.306158	0.306556	0.306466	0.306391	0.306574	0.306405	0.306012	0.305915	0.306156	0.30618	0.305678	0.305375	0.305959	0.306862	0.307073	0.306886	0.307006	0.307216	0.307501	0.307823	0.307863	0.307986	0.308376	0.308602	0.308565	0.308563	0.308541	0.308491	0.308635	0.30871	0.308685	0.309056	0.30976	0.31027	0.310322	0.31016	0.310356	0.310544
4	0.309544	0.309527	0.309959	0.310225	0.309655	0.308903	0.30843	0.308191	0.308575	0.309286	0.309424	0.309283	0.309298	0.309248	0.309491	0.309971	0.309874	0.30939	0.309238	0.309379	0.309247	0.308953	0.309188	0.309778	0.310047	0.310036	0.310269	0.310666	0.310792	0.310833	0.311082	0.311313	0.311456	0.311638	0.31164	0.311539	0.311619	0.31169	0.311745	0.311659	0.311272	0.311079	0.311537	0.312447	0.313005	0.312926	0.312986	0.313643	0.313975
4	0.299547	0.299972	0.300955	0.301414	0.30075	0.299825	0.29944	0.299246	0.299152	0.299383	0.299471	0.299345	0.299365	0.299664	0.300135	0.30047	0.300312	0.299778	0.299616	0.300076	0.30023	0.29981	0.299881	0.300611	0.301161	0.301051	0.30061	0.300549	0.300902	0.30128	0.30169	0.302036	0.302207	0.302311	0.302287	0.302415	0.302711	0.302789	0.302784	0.302604	0.302171	0.302056	0.302459	0.302859	0.302885	0.302968	0.30353	0.30411	0.304113
4	0.312197	0.312667	0.313358	0.313667	0.313055	0.312189	0.31169	0.311416	0.311683	0.312426	0.31267	0.312466	0.31225	0.31196	0.312164	0.312789	0.31274	0.312095	0.311719	0.311918	0.312141	0.312018	0.31214	0.312595	0.31293	0.312885	0.312648	0.312815	0.313224	0.313517	0.313917	0.31431	0.31447	0.314487	0.314418	0.314574	0.314988	0.315157	0.314964	0.314584	0.31439	0.314658	0.315255	0.315908	0.316307	0.316242	0.316002	0.316217	0.316432
4	0.294079	0.294491	0.295009	0.295253	0.294831	0.294136	0.293604	0.293138	0.293134	0.293573	0.293743	0.293704	0.2938	0.293953	0.294078	0.294136	0.293858	0.293349	0.293425	0.294161	0.294329	0.293783	0.293712	0.294281	0.294742	0.294842	0.29478	0.294757	0.294857	0.295125	0.295515	0.295729	0.295861	0.296127	0.296219	0.296265	0.296617	0.296917	0.296932	0.296774	0.29659	0.296575	0.296866	0.297515	0.298051	0.298113	0.298172	0.298539	0.298578
4	0.276735	0.27701	0.277645	0.277952	0.277562	0.276779	0.276069	0.275842	0.276149	0.276316	0.275974	0.2758	0.276176	0.276562	0.276802	0.277117	0.27715	0.276709	0.276457	0.276633	0.276486	0.276156	0.276587	0.277501	0.27791	0.277706	0.277437	0.277316	0.277202	0.277151	0.277301	0.277623	0.27801	0.278314	0.27847	0.278625	0.278804	0.278651	0.278295	0.27835	0.278808	0.279209	0.279472	0.279687	0.279777	0.279872	0.280203	0.28052	0.28018
4	0.283893	0.284219	0.284633	0.284643	0.283984	0.283312	0.283043	0.282804	0.282682	0.282906	0.282995	0.283082	0.283457	0.283648	0.283805	0.284093	0.283891	0.283233	0.282953	0.2834	0.283833	0.283815	0.283936	0.284295	0.284608	0.284937	0.285211	0.285235	0.285106	0.285095	0.285066	0.284886	0.284922	0.285239	0.285414	0.285506	0.285881	0.286229	0.286167	0.285868	0.285682	0.285745	0.286178	0.28685	0.287231	0.287327	0.28753	0.287976	0.288214
4	0.276994	0.277503	0.278315	0.278772	0.278021	0.27673	0.275938	0.275589	0.275651	0.276117	0.27635	0.276251	0.276305	0.276514	0.276788	0.276838	0.27633	0.275885	0.276176	0.276885	0.277048	0.276668	0.276532	0.276733	0.277023	0.277264	0.277486	0.277633	0.277726	0.277975	0.278233	0.278399	0.278832	0.279436	0.279421	0.278962	0.279049	0.279461	0.279491	0.279264	0.279056	0.279048	0.279455	0.280065	0.280395	0.280472	0.280728	0.281211	0.281219
4	0.292547	0.292713	0.293355	0.293784	0.293568	0.293048	0.292656	0.292221	0.292033	0.292363	0.292709	0.292908	0.292999	0.292754	0.292532	0.29269	0.292678	0.292304	0.29221	0.292621	0.29284	0.292612	0.292582	0.292985	0.293477	0.293661	0.29373	0.29411	0.294372	0.294351	0.29446	0.294584	0.29478	0.295169	0.295264	0.295044	0.295044	0.295164	0.295192	0.295347	0.295443	0.295218	0.295177	0.295697	0.296201	0.296436	0.296912	0.29751	0.297526
4	0.298442	0.298772	0.299264	0.29941	0.298707	0.297652	0.296984	0.29666	0.296863	0.297634	0.298121	0.298226	0.298227	0.297915	0.297761	0.298082	0.298246	0.297963	0.297754	0.298056	0.298285	0.298055	0.297934	0.298363	0.299236	0.299744	0.299524	0.299167	0.298798	0.298493	0.298633	0.299142	0.29988	0.300521	0.300565	0.300267	0.300199	0.300358	0.300441	0.300304	0.299968	0.299618	0.299703	0.300291	0.300807	0.301107	0.301564	0.302117	0.302112
4	0.282618	0.282661	0.283224	0.283621	0.283052	0.28209	0.281673	0.281562	0.281797	0.282395	0.282492	0.282276	0.2824	0.28272	0.283074	0.283194	0.282923	0.282557	0.282397	0.282458	0.28229	0.281978	0.282245	0.282853	0.283209	0.283363	0.283428	0.283469	0.2835	0.283535	0.283623	0.283761	0.284192	0.284768	0.28484	0.284741	0.285068	0.285318	0.285238	0.285027	0.284763	0.284739	0.285099	0.285623	0.286066	0.286388	0.286708	0.286985	0.286657
4	0.300887	0.301362	0.301737	0.301793	0.301354	0.300731	0.300355	0.300073	0.30018	0.300637	0.300628	0.300552	0.300897	0.301178	0.301292	0.301336	0.301129	0.300839	0.300803	0.301087	0.301251	0.301007	0.301035	0.30174	0.302277	0.302024	0.301613	0.301549	0.301796	0.302411	0.302997	0.302924	0.302602	0.302819	0.303182	0.303198	0.303197	0.303256	0.303255	0.303082	0.302742	0.302806	0.303679	0.304721	0.304957	0.304628	0.304786	0.305363	0.305049
4	0.287833	0.288015	0.288213	0.28788	0.287004	0.286296	0.286093	0.286088	0.286341	0.286715	0.286656	0.286621	0.286871	0.286824	0.286787	0.287074	0.287093	0.286793	0.286879	0.287341	0.287254	0.286622	0.286558	0.28727	0.287793	0.28771	0.287615	0.28763	0.287456	0.287526	0.287867	0.287971	0.287967	0.288133	0.288411	0.288723	0.289119	0.2895	0.289695	0.289508	0.28914	0.289041	0.289299	0.289855	0.290272	0.290306	0.290489	0.29102	0.291104
4	0.304238	0.304425	0.305146	0.305789	0.305439	0.304519	0.303803	0.303292	0.303153	0.303507	0.303857	0.304004	0.303935	0.30391	0.304185	0.304416	0.304408	0.304348	0.304363	0.304373	0.304069	0.303655	0.303844	0.304368	0.304644	0.30472	0.304706	0.304825	0.305078	0.305308	0.305758	0.306118	0.305978	0.306119	0.306534	0.306497	0.306315	0.30628	0.306401	0.306464	0.306327	0.306366	0.306791	0.307222	0.307319	0.307527	0.308149	0.30863	0.308238
4	0.307214	0.307504	0.30797	0.308094	0.30762	0.307181	0.306871	0.306094	0.305846	0.306845	0.307499	0.307245	0.307068	0.307144	0.307387	0.30775	0.307588	0.306722	0.306134	0.306476	0.306871	0.306771	0.306974	0.307657	0.308104	0.308087	0.308022	0.308062	0.307919	0.307842	0.308275	0.308819	0.309207	0.309595	0.309694	0.309538	0.309587	0.309717	0.309767	0.309701	0.309446	0.309393	0.309854	0.31041	0.310468	0.310309	0.310566	0.311051	0.311097
4	0.297357	0.297395	0.297402	0.2971	0.296441	0.295998	0.295756	0.2953	0.295363	0.295963	0.295834	0.295544	0.296047	0.296581	0.296619	0.296474	0.296302	0.296108	0.296142	0.296583	0.296843	0.296538	0.296211	0.296329	0.296831	0.297336	0.297698	0.297888	0.297716	0.297484	0.297678	0.298013	0.298167	0.298435	0.298652	0.298542	0.298564	0.298858	0.299108	0.298993	0.298591	0.298396	0.298562	0.298994	0.299387	0.299484	0.299563	0.299921	0.300055
4	0.300938	0.301565	0.302209	0.302254	0.301255	0.300286	0.300162	0.300244	0.300422	0.300679	0.300475	0.30042	0.300826	0.301107	0.301552	0.301906	0.301405	0.300625	0.300382	0.300609	0.300614	0.300348	0.300554	0.301158	0.3016	0.301857	0.302018	0.302006	0.301927	0.30224	0.302767	0.302804	0.302683	0.303046	0.303566	0.303803	0.303927	0.304053	0.304044	0.303921	0.303824	0.303693	0.303667	0.303952	0.304307	0.304644	0.305041	0.305404	0.305263
4	0.300086	0.300599	0.301285	0.301346	0.300768	0.300132	0.299743	0.299496	0.299662	0.299964	0.300045	0.300411	0.300794	0.30067	0.300605	0.300784	0.300674	0.300171	0.299903	0.30047	0.301085	0.301013	0.300918	0.301122	0.301278	0.301512	0.302021	0.302372	0.302247	0.302048	0.302199	0.302468	0.302714	0.302951	0.302796	0.302598	0.302969	0.30329	0.303094	0.302829	0.302658	0.302589	0.30301	0.303778	0.304213	0.304355	0.304642	0.305127	0.305161
4	0.27994	0.280025	0.280423	0.280578	0.280021	0.279317	0.27886	0.278636	0.278935	0.279422	0.279429	0.279532	0.280169	0.280548	0.280342	0.280075	0.279879	0.279531	0.279192	0.279191	0.279439	0.279802	0.280149	0.280321	0.280597	0.281062	0.281369	0.281286	0.280931	0.280854	0.281269	0.28157	0.281573	0.281697	0.281728	0.281614	0.281834	0.282302	0.282618	0.282436	0.282067	0.282067	0.282553	0.283235	0.283487	0.283456	0.283642	0.28393	0.283789
4	0.295074	0.295198	0.295527	0.295664	0.295292	0.294735	0.294281	0.293927	0.294122	0.294685	0.294721	0.294726	0.295014	0.294842	0.294751	0.295252	0.295335	0.294794	0.294632	0.295068	0.295404	0.295329	0.295354	0.295633	0.295644	0.295437	0.295493	0.29576	0.295955	0.296146	0.296254	0.29619	0.29638	0.296929	0.297268	0.297282	0.297463	0.297659	0.297472	0.297104	0.296972	0.297112	0.297505	0.298195	0.298657	0.29874	0.299034	0.299622	0.299617
4	0.268322	0.268544	0.269205	0.269441	0.268854	0.2682	0.267824	0.267469	0.267582	0.268047	0.268094	0.268001	0.268186	0.268378	0.268523	0.26875	0.268809	0.268534	0.268338	0.268598	0.268721	0.268399	0.26835	0.268684	0.269002	0.269184	0.269198	0.269301	0.269555	0.269701	0.269807	0.269847	0.269883	0.27022	0.270715	0.271156	0.271438	0.27128	0.270753	0.270292	0.270165	0.27033	0.27077	0.271362	0.271629	0.271748	0.272183	0.272539	0.272318
4	0.286979	0.287291	0.287781	0.287814	0.287119	0.286349	0.286063	0.285983	0.286116	0.286607	0.28699	0.287174	0.287228	0.287109	0.287149	0.287372	0.287379	0.287009	0.286718	0.287053	0.287295	0.286967	0.287042	0.287655	0.287913	0.287769	0.28773	0.287838	0.287905	0.287897	0.288085	0.288556	0.288912	0.288987	0.288914	0.28892	0.289153	0.289341	0.289466	0.289625	0.289618	0.289525	0.28971	0.290226	0.290645	0.290805	0.291089	0.291633	0.29172
4	0.287458	0.287851	0.288246	0.28818	0.287423	0.286762	0.286583	0.286229	0.286157	0.286481	0.286535	0.286872	0.287341	0.287179	0.287133	0.287575	0.287824	0.287908	0.287875	0.287564	0.287214	0.287	0.287087	0.287437	0.287839	0.288104	0.288174	0.288228	0.288182	0.288176	0.288517	0.28876	0.2888	0.289156	0.289508	0.289326	0.289103	0.289301	0.2896	0.289628	0.289484	0.289404	0.289616	0.290218	0.290679	0.290766	0.291071	0.291681	0.291642
4	0.300162	0.300245	0.300792	0.301056	0.300444	0.299684	0.299321	0.299097	0.299171	0.299523	0.299748	0.300013	0.300363	0.300573	0.300708	0.300821	0.30074	0.300397	0.300218	0.300288	0.300077	0.299812	0.300167	0.300924	0.301383	0.301383	0.301205	0.300923	0.300573	0.300653	0.301188	0.301585	0.301959	0.302572	0.302792	0.302406	0.302298	0.302542	0.302644	0.302706	0.30271	0.302695	0.302789	0.302911	0.30328	0.303879	0.304298	0.30476	0.305087
4	0.297211	0.297158	0.297512	0.297861	0.297578	0.296851	0.296238	0.295851	0.295868	0.296214	0.296461	0.296778	0.297115	0.297169	0.29731	0.297571	0.297525	0.297244	0.297054	0.297049	0.296871	0.296645	0.29702	0.297722	0.298146	0.298039	0.297594	0.297447	0.297606	0.297763	0.29811	0.298699	0.299251	0.299604	0.299753	0.299885	0.300073	0.300137	0.300083	0.299852	0.299438	0.299285	0.299808	0.300592	0.300953	0.300958	0.301028	0.301295	0.301196
4	0.302805	0.303234	0.303866	0.304174	0.303835	0.303113	0.302563	0.302136	0.302043	0.302709	0.303322	0.303243	0.303083	0.303165	0.303393	0.303554	0.303326	0.303053	0.303093	0.3032	0.303082	0.303038	0.303429	0.303979	0.304255	0.304183	0.304165	0.304339	0.304524	0.30489	0.305217	0.304975	0.304712	0.305103	0.305643	0.305796	0.305715	0.305576	0.305448	0.305424	0.305573	0.305795	0.306124	0.306691	0.30716	0.307336	0.307434	0.30762	0.307575
4	0.303658	0.304106	0.304649	0.304672	0.303996	0.303492	0.30298	0.302086	0.301877	0.302501	0.30313	0.303628	0.303891	0.303838	0.303937	0.304298	0.304422	0.303962	0.303195	0.302873	0.303089	0.303361	0.303553	0.303919	0.304458	0.304708	0.304588	0.304482	0.304483	0.304698	0.305288	0.305771	0.305916	0.305955	0.305833	0.305882	0.306252	0.306244	0.305899	0.305736	0.305722	0.305835	0.306083	0.306497	0.30699	0.307169	0.307245	0.307765	0.308028
4	0.293546	0.294099	0.294575	0.294538	0.294021	0.29361	0.293348	0.292907	0.292866	0.293428	0.293814	0.293874	0.293947	0.29408	0.29418	0.294183	0.294033	0.293765	0.293705	0.294005	0.294008	0.293507	0.293486	0.294269	0.294998	0.295085	0.295013	0.295329	0.295602	0.295577	0.295686	0.295934	0.296071	0.296164	0.296214	0.296397	0.296859	0.297138	0.297039	0.296736	0.296322	0.296203	0.296794	0.297747	0.298387	0.298513	0.298534	0.298749	0.298526
4	0.316717	0.316849	0.317404	0.317733	0.317242	0.316434	0.315833	0.315547	0.315699	0.316142	0.31633	0.31636	0.316531	0.316587	0.316601	0.31679	0.316861	0.31648	0.31606	0.316153	0.31614	0.315886	0.316312	0.317204	0.31769	0.317553	0.317272	0.317305	0.317501	0.31784	0.318272	0.318388	0.318393	0.318603	0.318709	0.318799	0.319132	0.319328	0.319239	0.318954	0.318649	0.318632	0.31887	0.319312	0.319836	0.320116	0.320306	0.320937	0.321258
4	0.289784	0.290211	0.290582	0.290412	0.289705	0.289138	0.288689	0.288145	0.288081	0.288524	0.288774	0.288927	0.289193	0.289302	0.289463	0.2899	0.290111	0.289882	0.289758	0.289704	0.289177	0.288791	0.289241	0.289866	0.29014	0.290264	0.290337	0.290302	0.290202	0.290167	0.290415	0.290766	0.290829	0.291072	0.29159	0.291819	0.291994	0.292114	0.291827	0.291548	0.291659	0.291821	0.291936	0.292224	0.292469	0.292557	0.292603	0.292767	0.292926
4	0.294745	0.29528	0.295819	0.295739	0.294849	0.293813	0.293459	0.29356	0.293693	0.293895	0.294039	0.294287	0.29456	0.294488	0.294406	0.294477	0.294405	0.294252	0.294129	0.294197	0.294389	0.294488	0.294802	0.295152	0.295028	0.294759	0.294792	0.294976	0.295179	0.295477	0.29571	0.295743	0.29596	0.296699	0.297193	0.29703	0.296979	0.297105	0.29712	0.296904	0.296442	0.296263	0.296556	0.297091	0.297732	0.298205	0.298427	0.298461	0.297924
4	0.299454	0.299838	0.300574	0.300916	0.300326	0.299282	0.298615	0.298522	0.298864	0.299363	0.299247	0.298738	0.298792	0.299289	0.299942	0.300633	0.300687	0.299834	0.299	0.298918	0.29898	0.298943	0.299337	0.300151	0.300882	0.301014	0.300638	0.300247	0.300259	0.300864	0.301539	0.301525	0.301139	0.301241	0.301591	0.301748	0.301843	0.301729	0.301537	0.301633	0.301731	0.301605	0.30186	0.302697	0.303345	0.303591	0.303825	0.304091	0.304084
4	0.300712	0.301147	0.301524	0.301536	0.300983	0.300416	0.30032	0.300205	0.300085	0.300151	0.29993	0.299841	0.300329	0.300847	0.301248	0.301394	0.300988	0.300515	0.30044	0.300657	0.300753	0.300626	0.300695	0.300953	0.301125	0.301317	0.301533	0.301519	0.30145	0.301795	0.302381	0.302676	0.30274	0.302913	0.303164	0.303489	0.303841	0.303714	0.303241	0.303036	0.303097	0.303233	0.303458	0.303851	0.304292	0.304662	0.305058	0.30545	0.305307
4	0.301279	0.301268	0.301465	0.301531	0.300912	0.300084	0.299587	0.299318	0.299489	0.299971	0.300314	0.300755	0.301136	0.300964	0.30076	0.300847	0.30041	0.299502	0.299326	0.299985	0.300389	0.30032	0.300368	0.300554	0.300907	0.301361	0.301317	0.300956	0.300925	0.301226	0.301499	0.301559	0.301745	0.302238	0.302665	0.302912	0.303141	0.303226	0.303141	0.302983	0.30268	0.302515	0.302921	0.303685	0.304193	0.304278	0.304457	0.304956	0.305012
4	0.310183	0.310114	0.310352	0.310573	0.310069	0.309236	0.308782	0.308871	0.309454	0.309913	0.309819	0.309778	0.310054	0.310282	0.310611	0.310845	0.310522	0.310005	0.309668	0.309589	0.309544	0.309495	0.309918	0.310496	0.31065	0.310613	0.310619	0.310748	0.311007	0.311305	0.311621	0.311676	0.311658	0.312021	0.312329	0.312394	0.312609	0.312767	0.312602	0.312414	0.312538	0.312769	0.312816	0.312888	0.313275	0.313864	0.314318	0.314505	0.31397
4	0.300329	0.300559	0.300731	0.300687	0.300141	0.299468	0.299006	0.298575	0.29842	0.298607	0.298742	0.298893	0.29909	0.299149	0.299412	0.299771	0.299612	0.299272	0.299371	0.299725	0.29972	0.299566	0.299814	0.300206	0.300353	0.300192	0.300026	0.300109	0.300214	0.300426	0.300959	0.301331	0.301255	0.301124	0.301191	0.301427	0.301771	0.30191	0.301633	0.301137	0.300807	0.300868	0.30123	0.301808	0.302323	0.302589	0.30289	0.303338	0.30337
4	0.28829	0.288632	0.289185	0.289366	0.289003	0.288661	0.288453	0.288118	0.288007	0.28817	0.288283	0.288395	0.28843	0.288458	0.288839	0.289225	0.289099	0.288777	0.288709	0.288751	0.288487	0.288291	0.28876	0.289419	0.289748	0.28983	0.289827	0.289808	0.289731	0.2898	0.290172	0.290344	0.290194	0.2905	0.291037	0.291084	0.291088	0.291055	0.290797	0.290733	0.290752	0.290765	0.29108	0.291614	0.291986	0.292259	0.292686	0.29302	0.292795
4	0.300189	0.300591	0.301438	0.301584	0.300788	0.2998	0.299312	0.299241	0.299626	0.300411	0.300525	0.300139	0.300234	0.300588	0.300817	0.300876	0.300625	0.300185	0.300103	0.300454	0.300569	0.300401	0.300548	0.301029	0.301556	0.301713	0.301398	0.300961	0.300647	0.300793	0.301325	0.301888	0.302355	0.302591	0.302622	0.302827	0.303197	0.303298	0.303247	0.303114	0.302812	0.30261	0.302899	0.303568	0.303851	0.303853	0.304315	0.304917	0.304687
1	0.333074	0.333058	0.332899	0.332571	0.332693	0.333169	0.333543	0.333641	0.333177	0.332666	0.333118	0.333874	0.33355	0.332647	0.332216	0.332261	0.332245	0.331994	0.331652	0.331148	0.33109	0.33192	0.332822	0.333186	0.333107	0.332727	0.332487	0.332524	0.332637	0.332877	0.333064	0.333253	0.333397	0.333019	0.332703	0.332731	0.33234	0.331908	0.332067	0.332516	0.332539	0.332168	0.332491	0.333614	0.334362	0.334275	0.333936	0.333833	0.334188
1	0.353193	0.353118	0.353401	0.353383	0.353137	0.353315	0.353674	0.353755	0.353518	0.353201	0.353212	0.353567	0.353793	0.353745	0.353727	0.353744	0.353156	0.352114	0.35144	0.351591	0.352831	0.353809	0.353788	0.353781	0.35389	0.353852	0.353699	0.353676	0.353856	0.353635	0.353349	0.353635	0.353705	0.353587	0.353611	0.35311	0.352813	0.353509	0.354082	0.353948	0.35361	0.353012	0.352687	0.353584	0.354747	0.354851	0.3546	0.354834	0.3551
1	0.323956	0.323979	0.323766	0.323543	0.323671	0.323957	0.323933	0.323905	0.323825	0.323406	0.32309	0.322979	0.322866	0.32301	0.323448	0.323579	0.32311	0.3227	0.322888	0.323263	0.323695	0.324195	0.324318	0.324022	0.323913	0.324068	0.323762	0.323261	0.323183	0.322975	0.322539	0.322761	0.32346	0.323924	0.324278	0.324316	0.323791	0.323312	0.323403	0.323805	0.323679	0.32276	0.322152	0.322537	0.323327	0.324047	0.324346	0.324165	0.324124
1	0.314123	0.31411	0.314324	0.314399	0.314137	0.313993	0.313743	0.313481	0.313693	0.313916	0.313917	0.313839	0.313969	0.314451	0.314551	0.313911	0.313312	0.3135	0.313946	0.31399	0.314244	0.314422	0.313947	0.313724	0.314039	0.314197	0.313921	0.313869	0.314313	0.314198	0.313605	0.313636	0.313826	0.313703	0.314011	0.314721	0.314936	0.31473	0.31479	0.314924	0.314604	0.314134	0.314493	0.315577	0.315992	0.31574	0.315711	0.315785	0.315888
1	0.353566	0.352798	0.352319	0.3527	0.353174	0.35343	0.353622	0.353634	0.353482	0.35346	0.353539	0.353425	0.353194	0.353263	0.353514	0.353443	0.353145	0.353021	0.352994	0.352894	0.353175	0.353489	0.353438	0.353757	0.354215	0.354089	0.353867	0.354147	0.354332	0.353604	0.352603	0.352428	0.352519	0.352334	0.352622	0.353257	0.353331	0.352836	0.352457	0.352528	0.352473	0.352083	0.352123	0.35261	0.353311	0.354108	0.354194	0.353774	0.353952
1	0.320638	0.320266	0.319977	0.319791	0.319738	0.319578	0.319515	0.319891	0.32013	0.319744	0.319508	0.319981	0.32048	0.320382	0.320067	0.319772	0.319279	0.31903	0.319077	0.319154	0.319723	0.320389	0.320305	0.3198	0.319449	0.319368	0.31963	0.320227	0.3206	0.320212	0.319598	0.319468	0.319704	0.31978	0.319619	0.319691	0.319872	0.319799	0.320016	0.320691	0.320674	0.319887	0.319716	0.320334	0.320769	0.32064	0.320375	0.320406	0.320581
1	0.332179	0.331513	0.330989	0.330734	0.330551	0.330289	0.330245	0.330891	0.331665	0.331787	0.331513	0.331333	0.331555	0.331911	0.331879	0.331926	0.332354	0.332289	0.331374	0.330532	0.330634	0.331289	0.331489	0.3313	0.331522	0.331942	0.331984	0.331978	0.33216	0.331981	0.331398	0.331285	0.331602	0.331396	0.331122	0.331525	0.331763	0.331512	0.331607	0.331839	0.331402	0.331056	0.331888	0.333086	0.333434	0.333129	0.332816	0.332861	0.333328
1	0.316217	0.316269	0.316473	0.316264	0.315783	0.315981	0.316488	0.31665	0.316611	0.316575	0.316623	0.316223	0.315369	0.315219	0.315761	0.315999	0.315585	0.314897	0.314351	0.314083	0.314741	0.315983	0.316419	0.316249	0.316243	0.316287	0.316144	0.315747	0.315539	0.315658	0.315754	0.3161	0.316537	0.316447	0.316239	0.316516	0.31674	0.316538	0.316452	0.316464	0.316155	0.315603	0.315583	0.316346	0.316802	0.316882	0.31691	0.316464	0.316247
1	0.321328	0.320766	0.320074	0.320009	0.320471	0.320618	0.320664	0.321096	0.321576	0.321705	0.321771	0.322029	0.322088	0.321681	0.321108	0.320714	0.320139	0.319494	0.319469	0.3199	0.320431	0.320927	0.32109	0.321118	0.321239	0.321103	0.321028	0.321122	0.320883	0.320353	0.320285	0.32077	0.320705	0.320545	0.321119	0.321464	0.321213	0.321041	0.321256	0.321709	0.321853	0.321578	0.321404	0.321452	0.321576	0.321873	0.322386	0.322825	0.322983
1	0.334321	0.334135	0.334337	0.334132	0.333648	0.333625	0.333432	0.332963	0.332905	0.332968	0.333031	0.333425	0.333774	0.334062	0.334419	0.334157	0.333247	0.332736	0.33253	0.332218	0.332824	0.334037	0.33435	0.33407	0.334051	0.33387	0.333246	0.33301	0.333482	0.333717	0.333514	0.333551	0.333868	0.334019	0.333577	0.332932	0.332954	0.33351	0.333885	0.333989	0.333869	0.333438	0.333371	0.334112	0.334918	0.335317	0.335292	0.335053	0.33508
1	0.346353	0.345903	0.345473	0.345354	0.345847	0.346435	0.346332	0.345833	0.34558	0.345761	0.346275	0.346654	0.346669	0.346449	0.346167	0.345842	0.345532	0.345682	0.345842	0.345611	0.345781	0.345981	0.345568	0.345345	0.345481	0.345524	0.345527	0.345704	0.346241	0.346616	0.346571	0.346545	0.34663	0.346763	0.346539	0.345858	0.345442	0.345439	0.345643	0.346166	0.346323	0.345838	0.346021	0.346912	0.347104	0.346582	0.34611	0.346057	0.346507
1	0.302858	0.302336	0.30184	0.301829	0.302392	0.302854	0.302752	0.30252	0.302417	0.302233	0.302201	0.302086	0.301833	0.302177	0.302678	0.302425	0.301773	0.301582	0.301621	0.301543	0.301982	0.302475	0.302109	0.301568	0.301626	0.302131	0.30269	0.302985	0.302783	0.302083	0.301573	0.301836	0.302244	0.302009	0.301711	0.302091	0.302457	0.302105	0.301578	0.301778	0.302228	0.302049	0.302087	0.302941	0.303667	0.303751	0.303519	0.303137	0.302838
1	0.362429	0.361823	0.361965	0.362325	0.362286	0.362247	0.362264	0.362113	0.361794	0.361618	0.361685	0.361491	0.361242	0.361417	0.361777	0.361955	0.361783	0.361433	0.360954	0.360545	0.360735	0.361141	0.360961	0.360514	0.360729	0.361243	0.361296	0.361326	0.361505	0.361397	0.361143	0.361292	0.361752	0.361964	0.361999	0.36169	0.360866	0.36048	0.360787	0.361085	0.361366	0.361779	0.362147	0.362311	0.362303	0.362341	0.362601	0.363073	0.363304
1	0.317393	0.316904	0.316848	0.316845	0.317129	0.317796	0.317947	0.317492	0.316869	0.316617	0.317074	0.317582	0.317582	0.317435	0.317725	0.318126	0.317625	0.316344	0.315331	0.315632	0.31731	0.318555	0.318378	0.317473	0.316664	0.316613	0.317188	0.317589	0.317508	0.317291	0.317213	0.317357	0.317602	0.317693	0.317621	0.317484	0.317365	0.317445	0.317791	0.31806	0.31783	0.317453	0.317821	0.318669	0.318865	0.318618	0.318613	0.318761	0.319073
1	0.344635	0.344039	0.344012	0.344177	0.343927	0.343445	0.343121	0.343184	0.343576	0.343875	0.343954	0.343682	0.34326	0.342954	0.343028	0.343564	0.343728	0.343457	0.343095	0.342591	0.342618	0.343314	0.343734	0.343818	0.343887	0.343755	0.343847	0.344345	0.344533	0.344139	0.34387	0.343961	0.343551	0.342768	0.342619	0.34294	0.343113	0.34315	0.343291	0.343588	0.343481	0.343	0.343354	0.344433	0.344972	0.344928	0.344614	0.343911	0.343541
1	0.32059	0.320128	0.31974	0.319708	0.319878	0.319834	0.3195	0.319246	0.31938	0.319554	0.319433	0.319468	0.319839	0.32004	0.319938	0.31941	0.318481	0.318043	0.318269	0.318441	0.318807	0.319302	0.31913	0.318678	0.318387	0.318194	0.318628	0.319674	0.320134	0.319327	0.318331	0.31841	0.319164	0.31972	0.31988	0.319662	0.319275	0.318867	0.318711	0.31915	0.319442	0.318848	0.318351	0.318932	0.319782	0.319986	0.319716	0.319501	0.319715
1	0.334029	0.333966	0.334116	0.333912	0.333514	0.333062	0.332611	0.332721	0.333243	0.33366	0.333819	0.333712	0.333525	0.33306	0.332444	0.332284	0.3325	0.332561	0.332129	0.331844	0.332453	0.333023	0.332628	0.332208	0.332304	0.332184	0.331817	0.331727	0.33187	0.331806	0.331757	0.332257	0.332711	0.332684	0.332762	0.332842	0.332759	0.332756	0.332657	0.332535	0.33229	0.33195	0.332204	0.332788	0.333006	0.333297	0.333617	0.333498	0.333643
1	0.333328	0.333209	0.333084	0.332436	0.332052	0.332208	0.332456	0.332745	0.33295	0.33289	0.332931	0.333254	0.333423	0.333186	0.33281	0.332531	0.332149	0.331711	0.331622	0.331944	0.33243	0.332764	0.332963	0.333059	0.332836	0.332558	0.33258	0.3329	0.33339	0.333464	0.333208	0.333496	0.3339	0.333766	0.333562	0.333499	0.333419	0.333466	0.333716	0.333853	0.333401	0.332851	0.333196	0.333827	0.334085	0.334533	0.334813	0.334622	0.334725
1	0.317765	0.317955	0.318165	0.318015	0.31799	0.317884	0.317337	0.317276	0.317761	0.317754	0.317738	0.318243	0.318489	0.318046	0.317492	0.317505	0.317685	0.31739	0.316723	0.316184	0.31669	0.317748	0.317992	0.317662	0.317294	0.316978	0.316993	0.317459	0.317781	0.317442	0.317235	0.317688	0.31788	0.317666	0.317882	0.318028	0.317474	0.316866	0.316733	0.316985	0.317075	0.316841	0.31717	0.318166	0.318803	0.319024	0.318915	0.318312	0.31809
1	0.33142	0.330453	0.330831	0.331665	0.33183	0.331613	0.331632	0.331614	0.331507	0.331764	0.332487	0.333178	0.333181	0.332578	0.332132	0.331996	0.331829	0.331592	0.330994	0.33025	0.33032	0.330888	0.330866	0.330608	0.331047	0.331765	0.332056	0.331902	0.331375	0.330813	0.330714	0.330938	0.331114	0.331461	0.331943	0.331821	0.331308	0.331533	0.332465	0.332989	0.332532	0.331605	0.331026	0.331186	0.331854	0.33239	0.332553	0.332852	0.333435
1	0.348149	0.347478	0.346862	0.346777	0.347219	0.347572	0.347635	0.34774	0.347942	0.348184	0.348489	0.348615	0.348105	0.347226	0.346879	0.347233	0.347585	0.347408	0.346848	0.346538	0.347206	0.348433	0.3487	0.348286	0.348422	0.348588	0.348512	0.348577	0.348314	0.34764	0.347409	0.347826	0.34805	0.347781	0.347789	0.347914	0.347287	0.346516	0.346665	0.347399	0.347376	0.346713	0.346964	0.348034	0.34852	0.348348	0.348168	0.348041	0.348133
1	0.359366	0.358659	0.358399	0.358469	0.358544	0.358578	0.358578	0.358501	0.358427	0.358629	0.359108	0.359538	0.359711	0.359502	0.359237	0.359223	0.359206	0.359095	0.358636	0.357927	0.358096	0.359237	0.359742	0.359144	0.358741	0.358564	0.358173	0.358432	0.359275	0.359516	0.359133	0.358941	0.358948	0.358944	0.359051	0.359037	0.35888	0.358634	0.358239	0.358097	0.358043	0.357706	0.357729	0.358494	0.35939	0.359727	0.359293	0.358959	0.359508
1	0.307188	0.306585	0.306383	0.306617	0.307064	0.307377	0.307436	0.307557	0.307701	0.307538	0.307375	0.307358	0.307282	0.307056	0.30682	0.306745	0.306731	0.306838	0.306616	0.306069	0.306221	0.306653	0.306446	0.306243	0.3065	0.306722	0.307036	0.30754	0.30779	0.307616	0.307118	0.306838	0.306865	0.306679	0.306786	0.307497	0.307516	0.306499	0.305962	0.306372	0.306832	0.306897	0.306885	0.307371	0.307973	0.308005	0.30788	0.308163	0.308609
1	0.34423	0.34365	0.343277	0.343269	0.343579	0.344132	0.344392	0.344204	0.34416	0.344416	0.344552	0.344253	0.34365	0.343184	0.343431	0.344281	0.344752	0.3448	0.344413	0.343205	0.342549	0.343214	0.343814	0.343791	0.343695	0.34367	0.343705	0.34379	0.344029	0.344449	0.344578	0.344576	0.344747	0.344497	0.344103	0.344246	0.344494	0.344484	0.344579	0.344788	0.344532	0.343802	0.343486	0.344177	0.344856	0.344651	0.344484	0.345139	0.346049
1	0.321906	0.321236	0.320968	0.321165	0.321382	0.32137	0.321389	0.321299	0.320854	0.320639	0.321231	0.321862	0.322006	0.321803	0.3214	0.321531	0.32205	0.322055	0.321404	0.320754	0.320942	0.321561	0.321892	0.322134	0.322254	0.322122	0.32213	0.322396	0.322418	0.321887	0.321435	0.321434	0.321626	0.322135	0.322676	0.322547	0.322089	0.322009	0.322182	0.322402	0.322488	0.322202	0.322193	0.322916	0.323467	0.323288	0.322831	0.322753	0.323307
1	0.320025	0.319112	0.318904	0.318958	0.318756	0.318919	0.319408	0.319905	0.320337	0.320349	0.319939	0.319474	0.319402	0.319392	0.318997	0.318677	0.318723	0.319091	0.31926	0.318934	0.318921	0.319293	0.31951	0.319942	0.320269	0.319892	0.319734	0.320243	0.320713	0.320338	0.319528	0.31961	0.320145	0.320119	0.319892	0.319837	0.319646	0.319439	0.319529	0.31951	0.319001	0.318594	0.31917	0.320335	0.32084	0.320475	0.319877	0.319429	0.319539
1	0.313731	0.313407	0.312614	0.31191	0.312007	0.31271	0.313264	0.313471	0.313301	0.312721	0.312124	0.312069	0.312776	0.313192	0.312669	0.312203	0.312182	0.312287	0.311957	0.311418	0.311809	0.312295	0.311868	0.31173	0.312601	0.313409	0.313357	0.313044	0.313101	0.313182	0.312932	0.312636	0.312363	0.312177	0.312537	0.313065	0.312959	0.312605	0.312847	0.313082	0.312419	0.311935	0.312783	0.313878	0.313941	0.313706	0.313806	0.313832	0.313985
1	0.3296	0.328922	0.327853	0.327188	0.327346	0.327901	0.328391	0.328942	0.329247	0.328934	0.328385	0.328087	0.328255	0.328682	0.32871	0.328078	0.32734	0.32689	0.326624	0.326662	0.327276	0.327903	0.328095	0.328181	0.32813	0.328111	0.328337	0.32845	0.328278	0.327919	0.327828	0.328347	0.32857	0.328148	0.328162	0.328526	0.328677	0.328747	0.328761	0.328901	0.32893	0.328569	0.328527	0.329143	0.329746	0.329934	0.329587	0.328985	0.328951
1	0.330877	0.330833	0.330633	0.330417	0.330478	0.330598	0.330282	0.330067	0.330183	0.330119	0.33013	0.330185	0.330391	0.330833	0.330909	0.330796	0.330785	0.330461	0.32961	0.329025	0.32962	0.330547	0.330665	0.330443	0.330492	0.330417	0.329845	0.329617	0.330177	0.330559	0.330615	0.330703	0.330517	0.33035	0.33079	0.331263	0.331212	0.330914	0.330629	0.330717	0.330806	0.330447	0.330205	0.3302	0.330598	0.331612	0.332204	0.332003	0.331997
1	0.310426	0.309857	0.309332	0.309203	0.309346	0.309671	0.309754	0.309438	0.309429	0.30965	0.309847	0.310002	0.309898	0.309933	0.310387	0.31034	0.309328	0.308675	0.308764	0.308662	0.308859	0.309504	0.309983	0.310511	0.310813	0.310762	0.31085	0.311054	0.311016	0.310382	0.309506	0.309203	0.309223	0.309202	0.309669	0.310397	0.310645	0.31055	0.310426	0.310145	0.309714	0.309555	0.310359	0.311654	0.312197	0.312132	0.311888	0.31154	0.311263
1	0.312577	0.312288	0.311753	0.311422	0.31166	0.312224	0.31263	0.313018	0.313073	0.312414	0.312183	0.312741	0.313063	0.31286	0.312304	0.311661	0.311162	0.31105	0.311256	0.311266	0.311494	0.312049	0.312049	0.311571	0.31129	0.311191	0.311366	0.312214	0.313081	0.312829	0.311853	0.311521	0.311882	0.31199	0.311886	0.312072	0.312307	0.312319	0.312398	0.312481	0.311943	0.311277	0.311522	0.3122	0.312579	0.313005	0.313496	0.313612	0.313512
1	0.307565	0.307202	0.307015	0.30668	0.306426	0.306378	0.306465	0.306643	0.30648	0.306389	0.306976	0.307507	0.307588	0.307399	0.30712	0.306862	0.306589	0.306452	0.306273	0.306206	0.306726	0.307177	0.306972	0.306796	0.307152	0.307372	0.307128	0.307183	0.307583	0.307476	0.307205	0.307436	0.30723	0.306399	0.306181	0.306638	0.307279	0.307992	0.308207	0.307893	0.307518	0.307172	0.307357	0.308118	0.308497	0.30832	0.308265	0.308594	0.30911
1	0.338404	0.338159	0.337486	0.337158	0.337417	0.337503	0.33742	0.337526	0.337509	0.337438	0.337751	0.338034	0.337883	0.337572	0.337345	0.337274	0.33726	0.337151	0.336615	0.335852	0.335984	0.336637	0.336698	0.336624	0.337027	0.337441	0.337537	0.337821	0.338209	0.338088	0.337564	0.337301	0.337446	0.337595	0.337781	0.337854	0.337654	0.337607	0.337748	0.337783	0.337631	0.337373	0.337414	0.337899	0.338219	0.338357	0.338635	0.338461	0.337824
1	0.318328	0.317723	0.31728	0.317298	0.317379	0.317444	0.317394	0.317253	0.317245	0.317556	0.318468	0.319137	0.318715	0.318018	0.317824	0.317805	0.317439	0.316937	0.31644	0.316025	0.316337	0.317191	0.317684	0.317737	0.317639	0.317653	0.318213	0.31879	0.318526	0.317826	0.317515	0.317676	0.317619	0.3171	0.317156	0.317816	0.317745	0.317094	0.317035	0.317585	0.317658	0.317145	0.317171	0.317835	0.318159	0.318028	0.31803	0.31841	0.31898
1	0.335234	0.334823	0.334357	0.333876	0.333888	0.334322	0.334598	0.33462	0.334509	0.334436	0.334755	0.335212	0.335207	0.33477	0.3344	0.334272	0.334048	0.333647	0.333195	0.33309	0.333826	0.334589	0.334529	0.334202	0.333989	0.333686	0.333508	0.333746	0.334133	0.334197	0.333969	0.334059	0.334421	0.334246	0.333804	0.333758	0.334091	0.334349	0.333932	0.333629	0.333776	0.333533	0.333705	0.334644	0.335131	0.335103	0.334837	0.334486	0.334659
1	0.305807	0.305417	0.305365	0.305467	0.305752	0.305698	0.305284	0.305168	0.305422	0.305664	0.305673	0.305499	0.305492	0.305486	0.305268	0.305172	0.305057	0.304591	0.303723	0.302893	0.302972	0.303993	0.305312	0.305961	0.305798	0.305784	0.30568	0.305257	0.305023	0.304825	0.3048	0.305133	0.305418	0.30555	0.305414	0.305014	0.304956	0.305153	0.305131	0.305045	0.304848	0.304507	0.304555	0.304916	0.305261	0.30565	0.30568	0.305649	0.306042
1	0.335612	0.334608	0.334549	0.335086	0.335134	0.33478	0.334533	0.334459	0.334676	0.335167	0.335631	0.335722	0.335552	0.335452	0.335464	0.33546	0.335019	0.334169	0.33362	0.333744	0.334508	0.335178	0.335144	0.334993	0.335095	0.335087	0.335002	0.335207	0.335213	0.334774	0.334677	0.335073	0.335146	0.334541	0.334237	0.334526	0.334632	0.334681	0.334894	0.335262	0.335641	0.33524	0.334658	0.335252	0.336086	0.336137	0.336008	0.336232	0.336527
1	0.34162	0.341036	0.34054	0.340282	0.34033	0.34038	0.340196	0.340607	0.341416	0.341301	0.34074	0.340699	0.340985	0.341182	0.341186	0.340698	0.339883	0.33964	0.339557	0.339414	0.340062	0.340789	0.340699	0.340255	0.339957	0.339831	0.339765	0.339952	0.340286	0.340282	0.3402	0.340261	0.339992	0.339742	0.340135	0.340652	0.340853	0.340778	0.34066	0.34078	0.340574	0.339812	0.339619	0.340306	0.340941	0.341301	0.341199	0.340471	0.340017
1	0.32027	0.319389	0.318881	0.319059	0.319578	0.319778	0.319638	0.319706	0.319861	0.319772	0.319875	0.320349	0.320502	0.320089	0.3198	0.319729	0.319259	0.31852	0.318227	0.318556	0.319237	0.319736	0.319848	0.320019	0.320286	0.320431	0.320504	0.32043	0.320126	0.319686	0.31931	0.319407	0.320014	0.320515	0.320588	0.32046	0.320377	0.320255	0.32005	0.319836	0.319205	0.318512	0.318909	0.320071	0.320815	0.321111	0.321274	0.321281	0.321584
1	0.304198	0.304014	0.303684	0.30355	0.304048	0.304604	0.304528	0.304423	0.3044	0.303825	0.303484	0.303749	0.303868	0.303881	0.304085	0.304231	0.303843	0.303066	0.302133	0.301752	0.302982	0.304402	0.304222	0.30372	0.304093	0.304532	0.304375	0.303871	0.303568	0.303455	0.303605	0.304084	0.304143	0.303878	0.304045	0.304257	0.304142	0.303979	0.303881	0.303809	0.303334	0.302698	0.302895	0.303857	0.304741	0.305208	0.305369	0.305333	0.305214
1	0.279642	0.279626	0.279525	0.279392	0.279429	0.279464	0.279332	0.279228	0.279192	0.279342	0.279969	0.280364	0.2797	0.279066	0.279195	0.279436	0.279575	0.279734	0.279726	0.279328	0.278744	0.278293	0.278458	0.279145	0.279465	0.279206	0.278708	0.278652	0.279322	0.279902	0.279926	0.279848	0.280045	0.280231	0.280272	0.280503	0.280703	0.280492	0.280125	0.279951	0.279839	0.279726	0.279861	0.280239	0.280403	0.27998	0.279543	0.279634	0.27976
1	0.281313	0.281314	0.281288	0.281425	0.281339	0.280821	0.280706	0.281433	0.28206	0.28199	0.281741	0.28179	0.281709	0.280911	0.280068	0.28016	0.280887	0.281359	0.281177	0.280654	0.280383	0.280453	0.280309	0.279957	0.280065	0.280475	0.280455	0.280248	0.280291	0.280325	0.280655	0.281395	0.281839	0.281735	0.281643	0.281999	0.282263	0.282227	0.282033	0.2817	0.281756	0.282203	0.282623	0.282769	0.282483	0.281996	0.281751	0.281853	0.281634
1	0.310059	0.310376	0.310285	0.310264	0.310192	0.309829	0.309815	0.310427	0.311116	0.311332	0.311178	0.311136	0.310682	0.309732	0.309161	0.308877	0.308844	0.309513	0.310264	0.310109	0.309693	0.309868	0.310286	0.310385	0.309888	0.309252	0.308829	0.308634	0.309002	0.309565	0.309873	0.310046	0.309914	0.309891	0.310446	0.311139	0.311461	0.31138	0.310884	0.309926	0.309465	0.310013	0.310771	0.311149	0.311022	0.310572	0.310328	0.310575	0.310696
1	0.301711	0.301434	0.300924	0.300834	0.300741	0.30042	0.300695	0.301417	0.3017	0.301586	0.301544	0.301646	0.301549	0.301048	0.300357	0.299993	0.300219	0.301094	0.302054	0.301889	0.301153	0.301122	0.301488	0.301354	0.300405	0.299608	0.299779	0.300387	0.300843	0.301042	0.300891	0.300546	0.300614	0.301078	0.301588	0.302117	0.302479	0.302499	0.302135	0.301913	0.30219	0.302434	0.302424	0.30242	0.30226	0.30151	0.300875	0.301316	0.301995
1	0.334429	0.334526	0.334317	0.334193	0.334067	0.333898	0.334275	0.33517	0.335633	0.335485	0.335109	0.33465	0.334243	0.333869	0.333396	0.333327	0.334384	0.335694	0.335664	0.334571	0.333815	0.333603	0.333519	0.333485	0.333414	0.333589	0.334028	0.334268	0.334304	0.33419	0.334082	0.334288	0.334626	0.334882	0.335173	0.33551	0.335765	0.336073	0.336111	0.335474	0.334936	0.335105	0.335475	0.335586	0.335563	0.335484	0.335247	0.334885	0.334314
1	0.275947	0.276083	0.275883	0.275918	0.276228	0.275982	0.275371	0.275548	0.276283	0.276516	0.276389	0.276205	0.275898	0.275814	0.275626	0.275202	0.275354	0.275942	0.275999	0.275197	0.274478	0.27475	0.275147	0.274818	0.274511	0.274742	0.274962	0.274819	0.274697	0.275023	0.275677	0.276079	0.276007	0.275893	0.276292	0.277167	0.277708	0.277529	0.276914	0.276239	0.27597	0.276169	0.276537	0.276941	0.277226	0.277148	0.276971	0.277138	0.277228
1	0.303458	0.303714	0.303591	0.303618	0.303771	0.303396	0.302929	0.303115	0.303652	0.304035	0.303981	0.303461	0.302775	0.302398	0.30232	0.302308	0.302527	0.302959	0.302968	0.302375	0.302198	0.302443	0.302363	0.302136	0.301974	0.302187	0.302802	0.303192	0.302929	0.302469	0.302795	0.303635	0.303965	0.303661	0.303442	0.304	0.30458	0.304123	0.303056	0.302488	0.302855	0.303616	0.304208	0.304562	0.3045	0.303845	0.303488	0.304026	0.304367
1	0.293555	0.29382	0.293664	0.293516	0.293468	0.293485	0.293768	0.294229	0.294416	0.294186	0.29405	0.294152	0.293849	0.293373	0.293346	0.293302	0.293282	0.29387	0.294349	0.293933	0.293332	0.293205	0.293148	0.293015	0.293094	0.293504	0.293967	0.293828	0.293359	0.293376	0.293623	0.293666	0.293695	0.293849	0.294272	0.294843	0.294997	0.295086	0.295329	0.294964	0.294262	0.294066	0.29435	0.294773	0.295066	0.294965	0.294955	0.295394	0.295371
1	0.290302	0.290472	0.290652	0.291211	0.291712	0.291402	0.29092	0.291071	0.291512	0.291692	0.291621	0.291522	0.291046	0.290224	0.289782	0.289852	0.290457	0.291582	0.292158	0.291663	0.291188	0.291097	0.290875	0.290606	0.290591	0.290963	0.291143	0.290823	0.290855	0.291631	0.292433	0.292544	0.292277	0.292289	0.292667	0.292871	0.292394	0.29218	0.292959	0.293525	0.29313	0.292553	0.292601	0.293109	0.29315	0.292712	0.292708	0.292844	0.29231
1	0.282414	0.282257	0.281871	0.282157	0.282308	0.28142	0.280772	0.281292	0.282224	0.282812	0.283024	0.283097	0.282836	0.282127	0.281209	0.280729	0.281091	0.281833	0.282525	0.28263	0.282078	0.281598	0.281548	0.281723	0.281798	0.281943	0.282112	0.28185	0.281516	0.281686	0.282188	0.282476	0.282577	0.282738	0.282905	0.283228	0.283585	0.283768	0.283864	0.283796	0.283649	0.283554	0.283475	0.283636	0.283989	0.284169	0.283986	0.28337	0.282625
1	0.284256	0.284739	0.28507	0.285438	0.285553	0.285619	0.285989	0.286269	0.286291	0.286299	0.286575	0.286739	0.286145	0.285137	0.284464	0.284617	0.285267	0.285733	0.285733	0.285113	0.28455	0.284604	0.284682	0.28445	0.28436	0.28468	0.284985	0.284984	0.284789	0.284736	0.285131	0.285562	0.285507	0.285262	0.285501	0.286299	0.287045	0.287138	0.286585	0.286349	0.286948	0.287355	0.287408	0.287752	0.287628	0.286742	0.286192	0.286452	0.28682
1	0.300277	0.300913	0.300893	0.30059	0.29997	0.299437	0.299192	0.299458	0.300117	0.300081	0.299659	0.299808	0.299939	0.299509	0.298951	0.298699	0.299069	0.299954	0.30041	0.299867	0.299142	0.298732	0.298421	0.298647	0.299137	0.299343	0.299429	0.299225	0.298904	0.298962	0.299086	0.299002	0.299169	0.299822	0.30074	0.301279	0.30118	0.300925	0.300323	0.299291	0.298849	0.299394	0.300221	0.300824	0.301035	0.300761	0.300144	0.299744	0.299494
1	0.341569	0.341279	0.341201	0.341246	0.341354	0.341398	0.341435	0.341811	0.342248	0.342476	0.342678	0.342727	0.342017	0.340848	0.340093	0.340244	0.3411	0.341457	0.341004	0.340656	0.340753	0.340707	0.340261	0.340019	0.340216	0.340441	0.340171	0.339627	0.33973	0.34047	0.34102	0.341155	0.341226	0.341255	0.3411	0.340996	0.340863	0.340614	0.340721	0.341186	0.341553	0.341654	0.341669	0.341935	0.342305	0.342146	0.341637	0.341286	0.340711
1	0.282832	0.282721	0.281955	0.281446	0.28155	0.281757	0.281745	0.281999	0.28257	0.282704	0.282239	0.281894	0.281964	0.282021	0.281744	0.281484	0.281881	0.282575	0.282602	0.282093	0.281853	0.281871	0.281662	0.281202	0.28113	0.281557	0.281631	0.281359	0.281409	0.281955	0.282393	0.282143	0.281727	0.281751	0.282183	0.282845	0.283337	0.28349	0.283629	0.283505	0.282822	0.282327	0.282762	0.28362	0.283825	0.283281	0.282842	0.282935	0.283037
1	0.328009	0.328027	0.328179	0.32862	0.328425	0.328139	0.328606	0.329262	0.329685	0.329674	0.32927	0.328828	0.328308	0.327631	0.326988	0.327063	0.328019	0.328905	0.32921	0.329137	0.328863	0.328613	0.328279	0.3276	0.327222	0.327414	0.327657	0.327905	0.328112	0.328239	0.328395	0.328509	0.328596	0.328544	0.32846	0.328709	0.32888	0.328995	0.329439	0.329712	0.329838	0.329976	0.329829	0.329627	0.329444	0.329306	0.329401	0.32942	0.329167
1	0.310127	0.309845	0.310433	0.311181	0.311283	0.310864	0.310715	0.311185	0.311725	0.311849	0.311682	0.311381	0.311055	0.310627	0.309772	0.309326	0.310229	0.31131	0.31124	0.310433	0.309929	0.309938	0.30989	0.309836	0.3101	0.310514	0.31093	0.311182	0.31115	0.310996	0.31098	0.311143	0.311192	0.310912	0.310897	0.31156	0.312312	0.312943	0.313131	0.312248	0.311239	0.311206	0.311466	0.311597	0.311817	0.311894	0.311913	0.311797	0.311369
1	0.285417	0.285461	0.285179	0.285294	0.28574	0.285922	0.285915	0.286256	0.286758	0.287074	0.287229	0.286622	0.285437	0.284536	0.283701	0.283324	0.284047	0.284978	0.285203	0.284867	0.284694	0.284591	0.284227	0.284472	0.285076	0.285021	0.284651	0.284645	0.284885	0.285032	0.285598	0.286548	0.28693	0.286453	0.285908	0.286113	0.286608	0.286815	0.286707	0.286255	0.285758	0.285561	0.285882	0.286638	0.287038	0.286646	0.286306	0.286673	0.286731
1	0.342911	0.343728	0.34399	0.344381	0.345053	0.344826	0.344131	0.344066	0.344111	0.343878	0.343586	0.343384	0.343408	0.343535	0.343772	0.343903	0.343546	0.343321	0.343728	0.343701	0.342928	0.342693	0.34325	0.343396	0.342924	0.342742	0.342437	0.341817	0.342046	0.343235	0.344079	0.343737	0.342777	0.34233	0.343046	0.343889	0.343461	0.34298	0.343594	0.344237	0.344479	0.344446	0.344295	0.344567	0.344628	0.343786	0.343129	0.343378	0.343336
1	0.325153	0.32547	0.325507	0.325327	0.325174	0.324993	0.324902	0.324911	0.324957	0.325081	0.325256	0.325426	0.325517	0.325332	0.324749	0.32428	0.324318	0.324595	0.324653	0.324283	0.32375	0.323331	0.323425	0.324031	0.324482	0.324484	0.324329	0.324347	0.324292	0.324484	0.325379	0.326068	0.325943	0.325513	0.325566	0.32614	0.326552	0.326465	0.326158	0.325867	0.325459	0.325463	0.32612	0.326779	0.327079	0.326782	0.326206	0.325992	0.325935
1	0.301439	0.301825	0.30163	0.301313	0.301062	0.300692	0.300903	0.301772	0.302104	0.301954	0.302313	0.302381	0.30141	0.300407	0.29987	0.299778	0.300199	0.300732	0.300868	0.300498	0.300062	0.299979	0.300295	0.300578	0.300159	0.29967	0.29989	0.300257	0.300787	0.30161	0.301716	0.300911	0.300382	0.300514	0.300912	0.301411	0.301603	0.301541	0.301499	0.301301	0.300973	0.300931	0.301184	0.301362	0.301631	0.301879	0.301913	0.301833	0.301395
1	0.317514	0.318025	0.318015	0.317891	0.31771	0.317463	0.317337	0.317789	0.318646	0.318987	0.318545	0.317581	0.316737	0.316443	0.316139	0.315692	0.315984	0.317023	0.317461	0.317084	0.317123	0.317495	0.317176	0.316675	0.316839	0.317261	0.317398	0.317206	0.316858	0.316798	0.317188	0.317415	0.317377	0.317494	0.317735	0.318334	0.319078	0.319165	0.318763	0.318498	0.318563	0.318676	0.318642	0.318718	0.318681	0.31821	0.317852	0.317879	0.317854
1	0.291466	0.291658	0.292089	0.29196	0.291341	0.290994	0.291344	0.291992	0.29273	0.293469	0.293555	0.292961	0.292305	0.291824	0.291259	0.290699	0.290734	0.291437	0.292144	0.291974	0.291254	0.291023	0.291009	0.290749	0.290701	0.291266	0.291793	0.291544	0.291218	0.291515	0.292061	0.29244	0.292389	0.291959	0.292011	0.292711	0.292981	0.292694	0.29225	0.291892	0.291977	0.292204	0.292551	0.293058	0.293098	0.292714	0.292564	0.292798	0.292884
1	0.295293	0.296012	0.296117	0.296337	0.296764	0.29648	0.295988	0.296042	0.296328	0.296437	0.296241	0.295975	0.295494	0.294531	0.293734	0.293961	0.294829	0.295504	0.295847	0.295585	0.294994	0.29474	0.294675	0.294564	0.294417	0.294427	0.29476	0.295113	0.295134	0.295058	0.295229	0.295453	0.295539	0.295445	0.295394	0.296019	0.296995	0.297413	0.297258	0.296996	0.296757	0.296458	0.296358	0.296711	0.297145	0.297017	0.296634	0.296761	0.296955
1	0.318152	0.317556	0.316599	0.316603	0.317093	0.317135	0.31712	0.317327	0.317481	0.317486	0.317524	0.317614	0.317406	0.317038	0.316922	0.317153	0.317382	0.317312	0.317433	0.317586	0.317378	0.317141	0.316772	0.316234	0.315952	0.316147	0.316487	0.316494	0.31622	0.31637	0.317057	0.317469	0.317626	0.317952	0.318282	0.318685	0.319069	0.318972	0.318613	0.318338	0.318014	0.317932	0.318644	0.319529	0.31938	0.318521	0.318292	0.318609	0.318297
1	0.291961	0.292796	0.292958	0.292933	0.292607	0.292125	0.292233	0.292673	0.292803	0.29269	0.292486	0.291972	0.291156	0.290636	0.290729	0.291036	0.291516	0.292185	0.292232	0.291444	0.290622	0.290236	0.29015	0.290075	0.289992	0.290106	0.290438	0.29105	0.291792	0.292345	0.292489	0.291979	0.291282	0.291162	0.291783	0.292811	0.293475	0.293268	0.292659	0.292461	0.292527	0.292484	0.292645	0.292928	0.293087	0.293196	0.293199	0.29301	0.292536
1	0.307414	0.307568	0.307342	0.307232	0.306968	0.30651	0.306597	0.307452	0.308512	0.309009	0.30886	0.3087	0.308712	0.308093	0.306922	0.306533	0.307133	0.307785	0.307851	0.307487	0.306921	0.306291	0.30614	0.306346	0.306402	0.306488	0.306889	0.307595	0.307955	0.30756	0.307187	0.307357	0.307656	0.307632	0.307575	0.307871	0.308156	0.308204	0.308034	0.307645	0.307576	0.308097	0.308577	0.308658	0.308232	0.307212	0.306456	0.306613	0.307141
1	0.287559	0.288422	0.288661	0.288823	0.289111	0.288814	0.288014	0.287493	0.287693	0.288275	0.288716	0.288887	0.288746	0.288196	0.287355	0.286918	0.287285	0.288032	0.288504	0.288456	0.288314	0.288207	0.287847	0.28736	0.287261	0.287593	0.287752	0.287713	0.287942	0.288415	0.288694	0.288622	0.288455	0.288391	0.288769	0.289618	0.290404	0.290704	0.290444	0.290066	0.289833	0.289735	0.28994	0.290257	0.290376	0.290176	0.289689	0.289451	0.289598
1	0.29457	0.295479	0.295624	0.29514	0.294825	0.294734	0.294978	0.295273	0.295404	0.295413	0.294874	0.294123	0.293941	0.294167	0.294066	0.293692	0.293926	0.294818	0.295307	0.295018	0.29454	0.293592	0.292475	0.292097	0.292178	0.292778	0.293629	0.293914	0.293959	0.29411	0.294088	0.293929	0.294191	0.294869	0.295396	0.295803	0.295639	0.294803	0.294296	0.294395	0.294968	0.295551	0.295753	0.295916	0.295804	0.294958	0.294202	0.294411	0.294662
1	0.28685	0.287736	0.288051	0.287843	0.287354	0.286795	0.286826	0.287461	0.287866	0.28778	0.287661	0.28761	0.287503	0.28738	0.286938	0.286114	0.285975	0.286974	0.287812	0.28762	0.287142	0.28702	0.287043	0.286708	0.286177	0.286503	0.287508	0.288281	0.288554	0.288425	0.288207	0.287815	0.287577	0.287962	0.28879	0.289351	0.288995	0.288413	0.288332	0.28849	0.288568	0.288547	0.288472	0.28859	0.288892	0.2887	0.288338	0.28856	0.288749
1	0.298413	0.298399	0.298076	0.297731	0.296977	0.296656	0.297028	0.29735	0.297404	0.29769	0.298358	0.298533	0.298175	0.297998	0.297933	0.297926	0.2978	0.297506	0.297608	0.297794	0.297712	0.29781	0.298168	0.298484	0.298408	0.29795	0.297671	0.297936	0.298369	0.298479	0.298224	0.297757	0.297375	0.297253	0.297545	0.29793	0.297694	0.297287	0.297431	0.297986	0.29837	0.298471	0.299055	0.299817	0.299695	0.29895	0.298111	0.29743	0.297435
1	0.28602	0.286149	0.286317	0.286462	0.286552	0.286755	0.28688	0.286783	0.286675	0.286424	0.286216	0.286561	0.287289	0.287547	0.287083	0.286673	0.286682	0.286774	0.286886	0.287119	0.287206	0.287152	0.28714	0.287198	0.287371	0.287448	0.287474	0.287476	0.287442	0.287579	0.287541	0.287192	0.286912	0.286686	0.286621	0.286856	0.287417	0.288099	0.287998	0.286987	0.286117	0.28645	0.287877	0.28902	0.288965	0.288016	0.28734	0.287262	0.287193
1	0.284556	0.284787	0.285223	0.28562	0.285287	0.284433	0.28398	0.28417	0.284533	0.284721	0.28489	0.285171	0.285357	0.28525	0.284942	0.284736	0.284525	0.284583	0.285156	0.285681	0.286021	0.286059	0.285726	0.285366	0.285139	0.285148	0.285248	0.285143	0.285284	0.285824	0.285734	0.284842	0.284146	0.284149	0.284665	0.285278	0.285554	0.285526	0.28532	0.28494	0.284655	0.284788	0.285535	0.286086	0.28581	0.285431	0.285308	0.285188	0.285091
1	0.328373	0.328501	0.327613	0.326576	0.326255	0.32665	0.327284	0.327611	0.327925	0.328334	0.328357	0.327859	0.327218	0.326932	0.327093	0.327812	0.32836	0.327852	0.327462	0.327601	0.327373	0.326884	0.32629	0.325955	0.326061	0.326078	0.326224	0.327043	0.327769	0.327537	0.32712	0.327047	0.327145	0.327568	0.327899	0.327847	0.327778	0.327623	0.327419	0.327442	0.327245	0.327193	0.327827	0.328182	0.32813	0.32831	0.328436	0.328283	0.328154
1	0.282422	0.282409	0.281951	0.28093	0.280561	0.281246	0.281772	0.281426	0.28158	0.28251	0.282811	0.282605	0.282613	0.282358	0.282073	0.282376	0.282605	0.282444	0.282275	0.281826	0.281169	0.281124	0.281558	0.281958	0.282103	0.281777	0.281572	0.282498	0.283894	0.284241	0.283974	0.283703	0.282974	0.282236	0.282365	0.283118	0.283631	0.283547	0.283258	0.283378	0.283489	0.283364	0.283578	0.283616	0.283231	0.283036	0.283057	0.283336	0.283708
1	0.283483	0.282555	0.281594	0.281834	0.282813	0.283239	0.282966	0.282711	0.282949	0.283405	0.283287	0.282605	0.282608	0.283328	0.283685	0.284148	0.284729	0.284532	0.284014	0.283617	0.283061	0.282571	0.282549	0.282836	0.282987	0.282877	0.282679	0.282827	0.283496	0.283831	0.283457	0.282924	0.28273	0.283076	0.283705	0.284346	0.284803	0.28494	0.284728	0.28434	0.284047	0.284223	0.284527	0.284139	0.283853	0.284168	0.283859	0.283091	0.283201
1	0.300314	0.300546	0.300006	0.299029	0.299029	0.299409	0.299302	0.299292	0.299915	0.300821	0.300965	0.299978	0.299198	0.299449	0.299922	0.300354	0.300814	0.300902	0.300588	0.300117	0.299797	0.299823	0.299803	0.299662	0.299867	0.300116	0.299979	0.30008	0.30057	0.300742	0.3005	0.30006	0.299719	0.299856	0.300315	0.300567	0.300678	0.301015	0.301097	0.30049	0.300102	0.300937	0.302086	0.302314	0.301868	0.301488	0.301194	0.30091	0.301118
1	0.303815	0.303246	0.302541	0.301983	0.302175	0.302868	0.303401	0.303432	0.303449	0.303524	0.302979	0.302544	0.303236	0.304101	0.304289	0.304494	0.304769	0.304539	0.304346	0.304294	0.303632	0.302641	0.302178	0.302439	0.302832	0.302865	0.303014	0.303578	0.30395	0.303945	0.30387	0.303868	0.303649	0.303359	0.303797	0.304648	0.305038	0.304819	0.304123	0.303152	0.302613	0.303078	0.303744	0.303732	0.303698	0.303885	0.303434	0.302821	0.303272
1	0.306196	0.306219	0.305787	0.304999	0.304869	0.30521	0.305178	0.305006	0.305071	0.305307	0.305402	0.305418	0.305625	0.305851	0.306291	0.306944	0.306946	0.306446	0.306307	0.306117	0.305752	0.305971	0.306156	0.305783	0.305573	0.305468	0.30539	0.30582	0.306403	0.306499	0.306069	0.305399	0.305175	0.305838	0.3066	0.306798	0.306867	0.307052	0.307058	0.306631	0.306073	0.306098	0.306766	0.307353	0.307636	0.307996	0.307695	0.306554	0.306072
1	0.319514	0.319996	0.319439	0.318243	0.317868	0.318428	0.31893	0.319075	0.319476	0.31987	0.319627	0.319495	0.319868	0.319807	0.319515	0.319757	0.319765	0.319417	0.319727	0.320372	0.320261	0.319354	0.31867	0.319035	0.31985	0.319982	0.319252	0.318463	0.318341	0.31877	0.31928	0.3195	0.319333	0.319183	0.319388	0.319625	0.319635	0.319714	0.319976	0.319999	0.31966	0.319829	0.3207	0.321211	0.321204	0.321278	0.321161	0.320556	0.319973
1	0.322169	0.322349	0.321953	0.321359	0.321286	0.321578	0.321793	0.321649	0.321407	0.3217	0.32197	0.321382	0.320703	0.320637	0.321227	0.322166	0.322219	0.321104	0.320277	0.320366	0.320728	0.321062	0.321417	0.321761	0.321907	0.321583	0.321224	0.32165	0.322244	0.322028	0.321517	0.321137	0.321	0.321457	0.321963	0.322055	0.322093	0.322144	0.322124	0.322092	0.321923	0.322094	0.322602	0.322416	0.322034	0.322259	0.322468	0.322216	0.321825
1	0.285344	0.286055	0.285842	0.285009	0.284784	0.285387	0.285984	0.285744	0.285227	0.285405	0.285584	0.285155	0.285081	0.28544	0.285572	0.285754	0.286099	0.286105	0.285694	0.285313	0.285367	0.28562	0.285437	0.285394	0.285788	0.285763	0.285523	0.285749	0.28624	0.286285	0.285799	0.285529	0.285816	0.286053	0.28607	0.286481	0.286998	0.287005	0.286828	0.286775	0.286677	0.286705	0.287184	0.287772	0.287977	0.287996	0.287795	0.287188	0.286882
1	0.261749	0.262116	0.261739	0.260975	0.260861	0.261277	0.261275	0.260946	0.261066	0.261581	0.261841	0.261676	0.261626	0.261878	0.262259	0.262635	0.262492	0.261938	0.261807	0.262117	0.262387	0.262456	0.262177	0.261805	0.261732	0.261774	0.261898	0.262345	0.2627	0.262449	0.262048	0.261927	0.261936	0.262019	0.262102	0.262289	0.262737	0.262986	0.262927	0.262954	0.262818	0.262805	0.26335	0.263669	0.263506	0.263419	0.263271	0.262944	0.263041
1	0.309978	0.310369	0.310239	0.309246	0.308862	0.309232	0.309464	0.309901	0.310601	0.310732	0.31033	0.309993	0.309699	0.309176	0.309045	0.309731	0.310191	0.309905	0.30937	0.309111	0.30917	0.308969	0.308862	0.309383	0.309607	0.309174	0.309114	0.31002	0.310964	0.310959	0.31044	0.309819	0.309349	0.309694	0.310516	0.310907	0.310799	0.31035	0.309771	0.309572	0.30973	0.310184	0.310938	0.311472	0.311634	0.311436	0.310855	0.310299	0.310281
1	0.308951	0.308824	0.30785	0.307165	0.307469	0.307822	0.307811	0.308025	0.308572	0.30905	0.30888	0.308218	0.308135	0.308287	0.30806	0.308605	0.309799	0.309933	0.309326	0.308975	0.308457	0.308144	0.308678	0.309523	0.309873	0.309496	0.30923	0.309501	0.309622	0.309286	0.308986	0.308994	0.308921	0.30883	0.309239	0.309671	0.3096	0.309433	0.309394	0.309385	0.30918	0.309261	0.310089	0.310771	0.310978	0.310902	0.309962	0.308855	0.308856
1	0.290515	0.291222	0.291322	0.291338	0.291373	0.290863	0.29049	0.291001	0.291838	0.291909	0.290991	0.290315	0.290631	0.291054	0.291327	0.291917	0.292061	0.291533	0.29115	0.290992	0.290839	0.290698	0.29079	0.291162	0.291346	0.291055	0.290782	0.291196	0.291731	0.291489	0.290937	0.290672	0.29091	0.291651	0.292112	0.292037	0.291886	0.291541	0.291504	0.292173	0.292254	0.291862	0.292014	0.292355	0.292868	0.293568	0.293536	0.292768	0.292508
1	0.309051	0.308785	0.307935	0.307469	0.308543	0.310074	0.310705	0.310785	0.310755	0.310359	0.309586	0.30909	0.309137	0.309221	0.309121	0.309441	0.310257	0.31068	0.3105	0.310014	0.30948	0.309295	0.30924	0.309148	0.309386	0.309514	0.309174	0.309095	0.309479	0.309636	0.309457	0.30925	0.309287	0.309664	0.309573	0.309056	0.309291	0.310253	0.310827	0.31025	0.309221	0.309252	0.310065	0.310242	0.310209	0.310822	0.311026	0.31035	0.309981
1	0.308436	0.308781	0.308689	0.308392	0.308491	0.308637	0.30861	0.309099	0.309775	0.309958	0.309544	0.308873	0.308886	0.309195	0.308882	0.308641	0.308794	0.308869	0.309239	0.309518	0.309045	0.308656	0.308855	0.309505	0.30998	0.309641	0.309139	0.309097	0.309122	0.308983	0.309088	0.309184	0.308937	0.308954	0.30927	0.309499	0.309506	0.309174	0.308879	0.308865	0.308785	0.308861	0.309544	0.310151	0.310063	0.309907	0.310103	0.310274	0.310292
1	0.304487	0.304358	0.303476	0.302284	0.301922	0.30247	0.303069	0.303173	0.303163	0.303333	0.303255	0.303099	0.303602	0.304181	0.304047	0.303797	0.303481	0.302978	0.302991	0.303211	0.303281	0.303365	0.303208	0.303157	0.303337	0.303362	0.303379	0.303674	0.30396	0.303674	0.303172	0.302979	0.303067	0.303659	0.30446	0.304615	0.304479	0.30448	0.304209	0.303578	0.302897	0.303235	0.304502	0.305247	0.305455	0.305499	0.305116	0.304748	0.304908
1	0.307199	0.306813	0.305765	0.304926	0.305322	0.30622	0.306512	0.306275	0.306112	0.306403	0.306594	0.306332	0.306351	0.3066	0.306655	0.306817	0.306727	0.30624	0.306203	0.306528	0.306453	0.305822	0.305225	0.305426	0.306012	0.30601	0.305859	0.306388	0.306789	0.306563	0.306367	0.306115	0.305878	0.306206	0.306805	0.30725	0.307396	0.307165	0.306887	0.306588	0.306131	0.306289	0.307107	0.307522	0.307712	0.308037	0.307774	0.307082	0.306868
1	0.321541	0.321195	0.320854	0.320466	0.320657	0.32089	0.320756	0.320905	0.321791	0.322501	0.321812	0.320682	0.320781	0.321433	0.321312	0.321107	0.321269	0.321346	0.321528	0.321466	0.320826	0.320242	0.320057	0.320108	0.320281	0.320578	0.321092	0.321795	0.32194	0.321564	0.321671	0.321596	0.320911	0.320992	0.321961	0.322859	0.323452	0.323321	0.32237	0.321359	0.320782	0.321146	0.32198	0.322213	0.322245	0.322414	0.322263	0.322093	0.322373
1	0.321137	0.320881	0.320012	0.31931	0.319231	0.319512	0.319957	0.320226	0.320305	0.320407	0.320002	0.319338	0.319401	0.319745	0.319984	0.320666	0.321194	0.321012	0.320681	0.320396	0.319955	0.319296	0.319145	0.31977	0.319887	0.31931	0.319145	0.319377	0.319465	0.319594	0.319887	0.319988	0.319881	0.320143	0.320652	0.320578	0.320303	0.320801	0.321491	0.321112	0.320009	0.319793	0.320492	0.320686	0.320576	0.320964	0.321237	0.320999	0.320861
1	0.289226	0.289157	0.288686	0.288285	0.288435	0.288683	0.28862	0.288676	0.288943	0.289154	0.288868	0.288157	0.288287	0.289013	0.289138	0.289205	0.289452	0.28923	0.289015	0.289194	0.289142	0.288778	0.288643	0.288837	0.288773	0.288207	0.288145	0.28895	0.289267	0.28888	0.288882	0.289336	0.289695	0.289971	0.290121	0.290051	0.290126	0.289985	0.289422	0.289131	0.289036	0.289127	0.28958	0.289714	0.289444	0.289486	0.289749	0.289835	0.28991
1	0.310659	0.309887	0.309078	0.308791	0.309361	0.309937	0.309787	0.309787	0.310698	0.311431	0.310898	0.3099	0.309989	0.310405	0.309902	0.309842	0.310694	0.311261	0.311043	0.310276	0.309713	0.309692	0.309668	0.309509	0.30963	0.309962	0.310187	0.310401	0.310393	0.310019	0.310033	0.310212	0.309955	0.309955	0.310432	0.310594	0.310311	0.310287	0.31049	0.310374	0.310171	0.310512	0.311252	0.31171	0.311871	0.311895	0.31162	0.311161	0.310789
1	0.292874	0.293066	0.292616	0.292234	0.292266	0.292211	0.292146	0.292334	0.292474	0.292511	0.292447	0.292169	0.292304	0.292943	0.293477	0.293939	0.293953	0.293192	0.29255	0.292353	0.292096	0.29184	0.292123	0.29284	0.29289	0.292266	0.291949	0.292144	0.292617	0.292785	0.292461	0.292125	0.292054	0.292234	0.292326	0.292362	0.292747	0.293121	0.292855	0.292267	0.292271	0.29322	0.293975	0.293382	0.292688	0.292955	0.293036	0.292629	0.292838
1	0.280246	0.280913	0.280353	0.279478	0.27937	0.27959	0.279457	0.278958	0.278805	0.27947	0.279984	0.279695	0.279223	0.278998	0.279257	0.279869	0.280077	0.27974	0.27953	0.279605	0.279807	0.279946	0.279582	0.279316	0.279374	0.278925	0.278468	0.27891	0.279806	0.280451	0.280611	0.280167	0.279478	0.279062	0.279202	0.279802	0.280258	0.280212	0.280017	0.279851	0.279355	0.279241	0.279995	0.280584	0.280681	0.280897	0.281045	0.280882	0.28089
1	0.292554	0.292899	0.292065	0.291256	0.291677	0.292495	0.292894	0.292808	0.292442	0.292424	0.292661	0.29236	0.291781	0.29164	0.291919	0.292313	0.292613	0.292783	0.292767	0.292448	0.291916	0.291675	0.291956	0.292449	0.292661	0.292258	0.291923	0.29225	0.292556	0.292763	0.293307	0.293316	0.292529	0.292003	0.292231	0.29278	0.293089	0.293348	0.293413	0.292852	0.292388	0.292757	0.293375	0.29353	0.293551	0.293662	0.293466	0.293296	0.293739
1	0.297315	0.296867	0.296415	0.296331	0.296755	0.29733	0.297945	0.298446	0.298048	0.297259	0.297058	0.297224	0.297537	0.297585	0.297475	0.297961	0.297996	0.297257	0.297347	0.298052	0.298146	0.297581	0.296973	0.296993	0.297265	0.29709	0.297066	0.29766	0.298103	0.297872	0.297477	0.297342	0.29735	0.297334	0.297496	0.297999	0.298469	0.29855	0.298347	0.298197	0.297974	0.297808	0.298176	0.298686	0.29901	0.299286	0.299161	0.29883	0.298807
1	0.335551	0.336459	0.336175	0.335175	0.334906	0.335155	0.334916	0.33436	0.334537	0.335275	0.335382	0.335051	0.335077	0.335083	0.335059	0.335585	0.335834	0.335233	0.334758	0.334663	0.334689	0.335002	0.335419	0.335679	0.335591	0.334875	0.334033	0.333979	0.334392	0.334701	0.334978	0.335123	0.334986	0.334786	0.334911	0.335122	0.335179	0.335343	0.335348	0.335162	0.335356	0.33579	0.336171	0.33635	0.336169	0.335925	0.335493	0.33516	0.335888
1	0.294576	0.294313	0.293736	0.293708	0.294223	0.2945	0.294226	0.29421	0.294694	0.295061	0.294798	0.294159	0.294327	0.295117	0.295477	0.295342	0.294988	0.294481	0.294191	0.294524	0.294674	0.293815	0.292751	0.292898	0.293957	0.294436	0.294199	0.294175	0.2944	0.294408	0.294307	0.293925	0.293227	0.293149	0.293938	0.294752	0.295209	0.295243	0.294922	0.294737	0.29496	0.295509	0.295992	0.296059	0.295768	0.295476	0.295362	0.295458	0.29576
1	0.297692	0.2975	0.297245	0.297212	0.297443	0.297623	0.297942	0.298212	0.298074	0.297797	0.297417	0.297231	0.297534	0.297519	0.297436	0.298235	0.299208	0.299555	0.299429	0.298818	0.297897	0.297359	0.297263	0.297439	0.297768	0.297926	0.298163	0.298816	0.299378	0.298968	0.297834	0.297145	0.297545	0.298479	0.298735	0.298498	0.298566	0.298468	0.298057	0.29795	0.298039	0.298541	0.299553	0.299793	0.299267	0.299001	0.298711	0.298406	0.298659
1	0.264973	0.26573	0.266045	0.265552	0.265078	0.264859	0.264845	0.265033	0.265418	0.265645	0.265282	0.265065	0.265571	0.266092	0.266166	0.266172	0.266288	0.266297	0.266064	0.265564	0.265196	0.265157	0.265123	0.265348	0.265536	0.265042	0.264642	0.264809	0.264874	0.264835	0.265152	0.265226	0.264842	0.264812	0.265448	0.266283	0.266539	0.26637	0.266317	0.266354	0.266333	0.266444	0.266907	0.267147	0.267117	0.267473	0.267778	0.267322	0.266442
1	0.295641	0.295589	0.294891	0.294273	0.294725	0.295598	0.295635	0.295432	0.29582	0.296218	0.29592	0.295336	0.2951	0.29492	0.294906	0.295808	0.296868	0.296713	0.296017	0.295633	0.295075	0.294565	0.294671	0.29511	0.295343	0.295387	0.295596	0.295924	0.295896	0.295457	0.295188	0.29514	0.295069	0.295087	0.295348	0.295652	0.295889	0.296142	0.296086	0.29574	0.295503	0.295962	0.296994	0.297162	0.296534	0.296401	0.296176	0.295699	0.296081
1	0.279522	0.279763	0.279379	0.278856	0.278584	0.278413	0.2783	0.278803	0.279804	0.280144	0.279403	0.278809	0.27921	0.279608	0.279529	0.279623	0.279683	0.279602	0.279602	0.279187	0.278832	0.278903	0.278774	0.278786	0.278924	0.278714	0.278593	0.279036	0.279448	0.279572	0.280013	0.280087	0.279289	0.278833	0.279218	0.279484	0.279609	0.280107	0.280241	0.279943	0.279775	0.279725	0.279949	0.280073	0.279761	0.279858	0.280237	0.280153	0.280265
1	0.294913	0.295461	0.295326	0.294815	0.294969	0.295321	0.295104	0.294611	0.294239	0.294091	0.29396	0.293735	0.294013	0.294665	0.295168	0.295857	0.29631	0.295916	0.29526	0.294925	0.29497	0.295015	0.294726	0.29479	0.295219	0.29508	0.294742	0.294976	0.295402	0.29557	0.29575	0.295962	0.296038	0.296108	0.296197	0.296165	0.295989	0.295815	0.295497	0.295063	0.295011	0.295453	0.295923	0.296119	0.296178	0.296279	0.296326	0.296242	0.296439
1	0.308925	0.308941	0.307376	0.306306	0.30676	0.307041	0.30662	0.306646	0.307216	0.307595	0.307334	0.307055	0.307747	0.308493	0.308094	0.307808	0.308186	0.30816	0.307874	0.307778	0.307879	0.307782	0.30703	0.306361	0.306187	0.306077	0.306276	0.307066	0.307687	0.307322	0.306559	0.306418	0.306773	0.307374	0.307972	0.307936	0.307867	0.308246	0.308274	0.307877	0.307573	0.307711	0.308141	0.308286	0.308229	0.308476	0.308801	0.308658	0.308388
1	0.291575	0.291508	0.290502	0.28929	0.289443	0.290217	0.290087	0.289586	0.289973	0.290917	0.291035	0.290397	0.290191	0.290395	0.290353	0.290468	0.290655	0.29005	0.289326	0.28934	0.289535	0.289582	0.289689	0.289746	0.289463	0.288891	0.288883	0.289793	0.29065	0.290926	0.290832	0.290361	0.289882	0.290152	0.290914	0.291447	0.291669	0.291535	0.291097	0.290706	0.29055	0.290868	0.291447	0.291516	0.291398	0.291594	0.29135	0.290727	0.290717
1	0.291898	0.292013	0.291482	0.29089	0.290996	0.291293	0.291265	0.291307	0.291683	0.292065	0.291934	0.291575	0.291745	0.291981	0.291965	0.292464	0.292978	0.292697	0.292316	0.292227	0.292179	0.292131	0.292168	0.292521	0.2927	0.29208	0.29146	0.291965	0.292955	0.292989	0.292384	0.292017	0.291911	0.292094	0.292297	0.292178	0.292009	0.291789	0.2916	0.291783	0.291756	0.291515	0.29166	0.291922	0.29247	0.293423	0.2937	0.293025	0.292409
1	0.291062	0.290852	0.290377	0.290114	0.290695	0.291778	0.292199	0.291761	0.291493	0.291749	0.291442	0.290324	0.289812	0.290227	0.290952	0.291697	0.291348	0.289937	0.289424	0.290037	0.290571	0.290676	0.290452	0.290458	0.290609	0.290197	0.289879	0.290467	0.291335	0.291555	0.29119	0.290817	0.290817	0.291239	0.291556	0.291454	0.291408	0.291491	0.291452	0.291452	0.291402	0.291308	0.291493	0.29191	0.292132	0.291995	0.291569	0.290865	0.290574
1	0.286929	0.28675	0.285874	0.285026	0.285081	0.28514	0.284707	0.284441	0.284959	0.286043	0.286506	0.286069	0.285758	0.285861	0.286086	0.286518	0.286713	0.286319	0.285799	0.28559	0.285495	0.28511	0.284706	0.284909	0.285456	0.285405	0.285025	0.285435	0.286437	0.286831	0.286334	0.285447	0.284673	0.284761	0.285673	0.286492	0.286769	0.286597	0.286312	0.286073	0.285756	0.285601	0.285977	0.286655	0.287057	0.287147	0.286859	0.286168	0.285959
1	0.287624	0.287643	0.286972	0.286263	0.286617	0.287491	0.287842	0.287598	0.287413	0.287397	0.287184	0.286893	0.286822	0.28705	0.287469	0.287753	0.287699	0.287572	0.287336	0.286719	0.286334	0.286547	0.28694	0.287334	0.287418	0.286836	0.286418	0.287131	0.288225	0.288544	0.287943	0.28719	0.287162	0.287816	0.288371	0.288263	0.288109	0.288174	0.287653	0.287113	0.287195	0.287446	0.287947	0.288447	0.288579	0.288537	0.288014	0.287202	0.287188
1	0.315843	0.315286	0.314466	0.314058	0.314322	0.314603	0.314451	0.314522	0.31496	0.315139	0.314847	0.314256	0.314007	0.31447	0.315186	0.315597	0.315211	0.314599	0.314628	0.314753	0.314382	0.313782	0.31378	0.314507	0.314755	0.314354	0.314531	0.315273	0.315548	0.315234	0.314857	0.314865	0.315148	0.31538	0.315413	0.315272	0.31534	0.315556	0.315636	0.315606	0.315538	0.315848	0.316292	0.316111	0.315833	0.316148	0.316344	0.315783	0.315406
1	0.302706	0.303253	0.302915	0.301859	0.301523	0.30191	0.302081	0.30185	0.301581	0.30146	0.301398	0.30137	0.301584	0.301984	0.302194	0.302686	0.303371	0.303114	0.30266	0.302792	0.302538	0.301949	0.30191	0.30208	0.301641	0.300871	0.300747	0.301275	0.301608	0.301569	0.301469	0.301443	0.301346	0.301201	0.301326	0.301491	0.301704	0.302117	0.302069	0.301592	0.301576	0.302305	0.30297	0.302867	0.302598	0.302494	0.302067	0.301715	0.30224
1	0.301151	0.300571	0.299579	0.298961	0.299086	0.299301	0.299183	0.298969	0.298775	0.298671	0.298592	0.298571	0.298708	0.298865	0.299397	0.300142	0.299937	0.299097	0.299056	0.299798	0.30001	0.299211	0.298284	0.297975	0.298596	0.299636	0.299949	0.299302	0.298522	0.298627	0.299085	0.298724	0.29807	0.298152	0.299027	0.299768	0.299743	0.29924	0.298499	0.297947	0.297884	0.298649	0.300203	0.301229	0.301531	0.301713	0.301261	0.300257	0.299613
1	0.294745	0.294588	0.294167	0.294023	0.294184	0.294229	0.294156	0.294233	0.294585	0.294879	0.294547	0.293893	0.29351	0.293213	0.293194	0.293791	0.294343	0.294251	0.293913	0.293767	0.294001	0.294328	0.293796	0.29279	0.292576	0.292907	0.292996	0.293286	0.294058	0.294447	0.294139	0.293672	0.293159	0.292835	0.293298	0.294265	0.295033	0.295188	0.294752	0.29449	0.294708	0.294894	0.294973	0.295046	0.295138	0.295332	0.295199	0.294859	0.294853
1	0.305463	0.306359	0.305916	0.304728	0.3044	0.304337	0.303767	0.303549	0.303961	0.304181	0.304144	0.304386	0.304739	0.304746	0.304301	0.304155	0.304879	0.305264	0.304476	0.303813	0.303839	0.303751	0.303823	0.304499	0.304958	0.30461	0.303913	0.303669	0.304046	0.304213	0.303918	0.303917	0.304404	0.304752	0.304645	0.304504	0.304595	0.304505	0.304285	0.304355	0.304326	0.304487	0.305163	0.305598	0.305673	0.305518	0.304925	0.304285	0.304197
1	0.296014	0.295475	0.294657	0.29427	0.294315	0.294527	0.294736	0.29486	0.295039	0.295457	0.295322	0.294516	0.294183	0.294385	0.294609	0.295042	0.295593	0.295686	0.295568	0.29555	0.295245	0.294688	0.294524	0.295101	0.295486	0.295162	0.294991	0.295257	0.295186	0.294673	0.294556	0.294796	0.294962	0.295383	0.296219	0.296456	0.295905	0.295699	0.295506	0.295054	0.295249	0.296128	0.296891	0.296868	0.296283	0.295898	0.295669	0.295271	0.295179
1	0.308541	0.308704	0.308488	0.308453	0.30878	0.308785	0.308644	0.308627	0.308763	0.309165	0.309244	0.308802	0.308627	0.308857	0.308992	0.309251	0.309727	0.309689	0.309076	0.308693	0.308708	0.308619	0.308345	0.308438	0.308902	0.308851	0.308432	0.308718	0.309424	0.30964	0.309633	0.309662	0.309265	0.308811	0.308847	0.308808	0.308596	0.308934	0.309709	0.310061	0.309705	0.30954	0.309808	0.30959	0.309205	0.30927	0.309068	0.30866	0.309023
1	0.269698	0.269589	0.269232	0.268801	0.269295	0.27015	0.270304	0.270053	0.270074	0.270251	0.270146	0.269859	0.270007	0.270363	0.270406	0.27051	0.270601	0.27048	0.270423	0.270499	0.270681	0.270535	0.270006	0.269799	0.269846	0.269727	0.269518	0.269739	0.270341	0.270633	0.270737	0.270576	0.270008	0.269927	0.270722	0.271418	0.271284	0.270475	0.269627	0.269751	0.270704	0.271444	0.271555	0.271313	0.271329	0.271629	0.271615	0.271252	0.271167
1	0.277041	0.277214	0.277065	0.27664	0.276647	0.276814	0.276736	0.276742	0.276695	0.27632	0.275975	0.275944	0.276229	0.276646	0.277192	0.277944	0.278511	0.278541	0.278207	0.277632	0.277226	0.277214	0.276977	0.276706	0.276613	0.276423	0.276382	0.276568	0.276836	0.277013	0.277059	0.277025	0.277023	0.277398	0.278129	0.278604	0.278425	0.277694	0.276848	0.276556	0.276944	0.27785	0.278776	0.279092	0.279159	0.279132	0.278536	0.277771	0.277926
1	0.303747	0.30451	0.304402	0.303538	0.303155	0.303358	0.303552	0.303317	0.303349	0.303972	0.303847	0.302972	0.302783	0.3031	0.303486	0.304249	0.304807	0.304932	0.304923	0.304663	0.30448	0.304455	0.304148	0.30402	0.304296	0.304211	0.303945	0.304231	0.304796	0.305097	0.305032	0.304538	0.303891	0.303627	0.303868	0.30426	0.304286	0.304113	0.304039	0.303885	0.304026	0.304872	0.305524	0.305357	0.305081	0.305033	0.304959	0.30472	0.304433
2	0.37045	0.370523	0.370703	0.370352	0.370595	0.371908	0.37263	0.371624	0.369867	0.369534	0.370452	0.370684	0.370282	0.370424	0.370948	0.37101	0.370827	0.370715	0.370383	0.369825	0.369561	0.369812	0.370166	0.370378	0.370537	0.370243	0.369327	0.369066	0.369812	0.370109	0.369759	0.369548	0.36983	0.370427	0.370571	0.370489	0.370618	0.370827	0.371265	0.371859	0.372115	0.371842	0.371482	0.371119	0.370823	0.371198	0.37167	0.371089	0.370494
2	0.366745	0.366008	0.365656	0.366008	0.367117	0.368343	0.368532	0.367239	0.365521	0.365318	0.36614	0.366208	0.366174	0.366883	0.367506	0.367658	0.367921	0.36806	0.367505	0.366576	0.36596	0.365237	0.36427	0.364365	0.365279	0.365564	0.365387	0.365773	0.36664	0.367004	0.366876	0.366566	0.365877	0.365463	0.365485	0.3657	0.366277	0.366887	0.367257	0.367275	0.367004	0.366786	0.366672	0.366407	0.36636	0.366899	0.367457	0.367147	0.36636
2	0.354497	0.354845	0.354827	0.354055	0.353774	0.355055	0.356042	0.354791	0.352939	0.352932	0.353693	0.35368	0.353347	0.353481	0.354286	0.354975	0.355286	0.355364	0.354956	0.354124	0.353423	0.353026	0.352914	0.353252	0.353566	0.353585	0.353662	0.354179	0.354908	0.355071	0.354762	0.354326	0.35359	0.35311	0.353228	0.353019	0.352436	0.352914	0.354261	0.35498	0.355175	0.355181	0.354791	0.354288	0.354103	0.354401	0.354534	0.353894	0.353532
2	0.396259	0.396207	0.396536	0.39666	0.396468	0.396785	0.397196	0.396323	0.394603	0.394523	0.396097	0.396689	0.396188	0.396183	0.396539	0.396573	0.396366	0.396339	0.396769	0.397006	0.396509	0.395327	0.394267	0.394414	0.395158	0.395427	0.395248	0.395215	0.395776	0.396543	0.396439	0.395243	0.394293	0.394458	0.394926	0.395055	0.395303	0.396184	0.397126	0.397336	0.397015	0.396558	0.396123	0.395839	0.395868	0.39612	0.395854	0.394913	0.394736
2	0.388435	0.388078	0.387558	0.387259	0.387394	0.388098	0.388261	0.387285	0.386326	0.386315	0.386658	0.386975	0.387584	0.387999	0.387964	0.387966	0.388374	0.388869	0.38868	0.387986	0.387379	0.386626	0.385933	0.385926	0.386312	0.386425	0.386226	0.386522	0.387445	0.387628	0.386699	0.385845	0.385852	0.386601	0.387385	0.387655	0.387369	0.387316	0.388039	0.388654	0.388357	0.387598	0.387303	0.387225	0.386898	0.387045	0.387418	0.387032	0.386732
2	0.374732	0.375108	0.375067	0.374409	0.374361	0.3754	0.375678	0.37446	0.373182	0.373437	0.374892	0.375597	0.37514	0.374942	0.37523	0.374702	0.373909	0.374176	0.374864	0.37507	0.374571	0.373445	0.372482	0.372449	0.373198	0.374158	0.374986	0.375713	0.376185	0.375902	0.375063	0.374057	0.373161	0.373038	0.373672	0.374325	0.374328	0.374333	0.375324	0.376378	0.376524	0.376096	0.375401	0.374613	0.37431	0.374893	0.37554	0.375261	0.375114
2	0.376785	0.37721	0.377252	0.376639	0.376287	0.376678	0.37669	0.375724	0.374387	0.374116	0.375042	0.375874	0.376051	0.376076	0.376374	0.376433	0.376328	0.3761	0.375467	0.374865	0.374521	0.373938	0.373169	0.373489	0.374747	0.375137	0.37496	0.375336	0.37545	0.375243	0.375425	0.374957	0.373586	0.373286	0.374122	0.374534	0.374886	0.375739	0.376376	0.376375	0.375929	0.375493	0.375354	0.375304	0.375119	0.374895	0.374722	0.37442	0.374589
2	0.396556	0.396203	0.395878	0.395445	0.395571	0.396755	0.397593	0.396859	0.39525	0.394641	0.395051	0.395392	0.395972	0.396726	0.397025	0.396705	0.396626	0.397109	0.397361	0.39699	0.396339	0.395732	0.395384	0.396086	0.397205	0.397099	0.396304	0.396037	0.396016	0.396159	0.396472	0.396041	0.395109	0.395112	0.395761	0.395905	0.396061	0.396742	0.397158	0.396964	0.396983	0.397123	0.396499	0.395671	0.395427	0.395823	0.396275	0.396147	0.396162
2	0.36027	0.360046	0.359728	0.359785	0.36046	0.361288	0.361056	0.35941	0.357671	0.357599	0.358484	0.358941	0.359392	0.36022	0.360783	0.360531	0.360067	0.35998	0.360073	0.359943	0.359789	0.359431	0.358482	0.358043	0.358521	0.358712	0.358573	0.359144	0.360282	0.360898	0.360309	0.358805	0.357924	0.358774	0.359899	0.359845	0.359196	0.358927	0.359164	0.359398	0.359649	0.359838	0.359849	0.359955	0.359894	0.359751	0.359849	0.359873	0.359911
2	0.391823	0.391694	0.391097	0.390399	0.390796	0.392377	0.393385	0.392103	0.389545	0.388799	0.389727	0.390416	0.390952	0.39157	0.391782	0.391204	0.390982	0.391763	0.392106	0.391516	0.390921	0.390539	0.390375	0.390579	0.39086	0.391027	0.391038	0.390762	0.390192	0.389953	0.390371	0.39026	0.389442	0.389745	0.39114	0.39206	0.392078	0.391706	0.391339	0.391059	0.391311	0.391965	0.392187	0.391748	0.391323	0.391526	0.391792	0.39147	0.391446
2	0.378298	0.377818	0.377277	0.37728	0.377913	0.37887	0.379038	0.377823	0.37634	0.376429	0.37759	0.377989	0.377806	0.378053	0.37876	0.37914	0.378941	0.378646	0.378655	0.378659	0.377964	0.376682	0.376124	0.376965	0.377957	0.377853	0.376998	0.376837	0.377832	0.378642	0.378089	0.376541	0.37569	0.376301	0.377002	0.377264	0.377618	0.377966	0.378163	0.377999	0.377576	0.377623	0.378076	0.377935	0.377473	0.377467	0.377485	0.377315	0.377642
2	0.375628	0.375671	0.375464	0.375522	0.376093	0.376722	0.376748	0.375985	0.375121	0.375434	0.376355	0.376269	0.375789	0.376035	0.376346	0.376135	0.376142	0.376325	0.375925	0.375168	0.374771	0.374714	0.374734	0.375406	0.376554	0.376857	0.376458	0.376527	0.3768	0.376502	0.375704	0.3747	0.374153	0.374748	0.375873	0.376507	0.376306	0.375731	0.37552	0.375626	0.37593	0.376466	0.376589	0.376082	0.375774	0.376348	0.377033	0.376622	0.376272
2	0.385784	0.385386	0.385179	0.385253	0.38556	0.385918	0.385976	0.385046	0.383501	0.383576	0.385022	0.385662	0.385438	0.385297	0.38536	0.38527	0.385414	0.385826	0.385501	0.384366	0.383465	0.382893	0.38263	0.383563	0.384972	0.38517	0.384456	0.384354	0.385137	0.385744	0.385481	0.384134	0.382728	0.382923	0.384133	0.384814	0.384583	0.384287	0.384547	0.3849	0.385069	0.38522	0.385506	0.385597	0.385239	0.385289	0.386007	0.386022	0.385534
2	0.400414	0.399889	0.400225	0.400586	0.400918	0.401576	0.401754	0.400456	0.398739	0.398961	0.400137	0.400079	0.399808	0.400084	0.399885	0.399226	0.399309	0.399979	0.400126	0.399672	0.399237	0.399011	0.399021	0.399558	0.39996	0.399565	0.399158	0.399506	0.400314	0.400572	0.399967	0.399181	0.398921	0.399754	0.400936	0.401054	0.400389	0.400257	0.4007	0.400956	0.400713	0.399959	0.399411	0.399226	0.399082	0.399604	0.400406	0.400306	0.399959
2	0.416508	0.416467	0.416333	0.416532	0.416928	0.417027	0.416419	0.414801	0.413379	0.414348	0.416327	0.416818	0.416579	0.416993	0.417381	0.416609	0.415985	0.416576	0.416908	0.41645	0.416305	0.416129	0.415294	0.41482	0.414913	0.414742	0.414541	0.414878	0.415263	0.415149	0.414738	0.413946	0.413053	0.413252	0.41433	0.415178	0.415663	0.416131	0.416364	0.415759	0.415101	0.415515	0.416224	0.416297	0.416101	0.415995	0.415853	0.41556	0.415694
2	0.380745	0.381059	0.380438	0.379569	0.379352	0.380163	0.380922	0.380227	0.378976	0.379256	0.380427	0.380924	0.380904	0.380722	0.380573	0.380483	0.380572	0.380842	0.380824	0.380284	0.37943	0.378641	0.378529	0.379367	0.380193	0.380124	0.379809	0.380231	0.380804	0.380605	0.379957	0.379118	0.378287	0.378044	0.378432	0.379192	0.379897	0.380385	0.380808	0.380812	0.380518	0.380445	0.380462	0.380321	0.380245	0.380548	0.380694	0.380039	0.379687
2	0.41103	0.410653	0.409864	0.408974	0.408711	0.409356	0.409805	0.40887	0.407318	0.407404	0.408895	0.409674	0.409679	0.409816	0.409934	0.409542	0.409011	0.408791	0.40899	0.409356	0.409001	0.407779	0.407155	0.407984	0.408574	0.407748	0.407081	0.407871	0.409237	0.409783	0.408989	0.407608	0.407381	0.40858	0.409358	0.409103	0.408705	0.40885	0.409621	0.409902	0.409444	0.409356	0.409247	0.408582	0.40841	0.408973	0.409324	0.409094	0.408937
2	0.395544	0.395573	0.395779	0.395493	0.39546	0.396097	0.395969	0.394538	0.393281	0.393667	0.394878	0.395334	0.395284	0.395401	0.395109	0.394444	0.394599	0.395466	0.395886	0.395678	0.395269	0.394605	0.394424	0.395372	0.39619	0.395597	0.394257	0.3938	0.394221	0.394645	0.394859	0.394509	0.393959	0.394058	0.394242	0.394192	0.39442	0.394927	0.395506	0.395836	0.395935	0.395949	0.395651	0.394902	0.393969	0.393936	0.394903	0.39499	0.39441
2	0.41027	0.410636	0.41012	0.409445	0.409762	0.410445	0.410487	0.409379	0.407825	0.407884	0.409267	0.409936	0.409685	0.409474	0.409607	0.409477	0.409302	0.409561	0.409592	0.40879	0.407604	0.407092	0.407664	0.40867	0.409157	0.409086	0.408934	0.409023	0.409476	0.409625	0.409087	0.408258	0.407764	0.408315	0.409286	0.409364	0.408906	0.409186	0.40991	0.409862	0.409333	0.409138	0.409438	0.409616	0.408762	0.408095	0.408669	0.408888	0.408606
2	0.403909	0.404116	0.403944	0.403515	0.403229	0.403301	0.403231	0.402453	0.401454	0.401981	0.403433	0.403983	0.403816	0.40356	0.403194	0.402493	0.402174	0.402726	0.403424	0.403473	0.403046	0.402701	0.402469	0.402749	0.403443	0.403608	0.403044	0.402463	0.402509	0.402988	0.403184	0.402729	0.402316	0.402492	0.402724	0.402801	0.402747	0.402735	0.403053	0.40344	0.403716	0.403601	0.403073	0.40254	0.40263	0.403785	0.404681	0.404095	0.403487
2	0.40748	0.407298	0.405944	0.404922	0.40518	0.406266	0.406693	0.405463	0.404143	0.404842	0.406254	0.406296	0.405704	0.405822	0.406388	0.406415	0.406278	0.406621	0.406787	0.406387	0.40557	0.404416	0.403869	0.404831	0.406291	0.406946	0.40686	0.40659	0.406496	0.406649	0.406524	0.405747	0.405152	0.405316	0.405632	0.405454	0.405152	0.405577	0.40635	0.406706	0.406686	0.406583	0.406692	0.406646	0.406227	0.406146	0.406399	0.406484	0.406489
2	0.405531	0.405506	0.405459	0.40513	0.404759	0.405114	0.405111	0.403677	0.402089	0.402503	0.404301	0.404838	0.403889	0.403439	0.404251	0.405144	0.405515	0.405671	0.405582	0.405275	0.40488	0.404205	0.4036	0.403551	0.403579	0.40337	0.403067	0.402929	0.403641	0.404958	0.405314	0.404396	0.403532	0.403551	0.403872	0.403826	0.403645	0.404181	0.405122	0.405	0.404259	0.403935	0.403929	0.40381	0.40342	0.403395	0.403583	0.403279	0.403244
2	0.365027	0.365137	0.365242	0.364898	0.364509	0.364563	0.364483	0.363711	0.362975	0.363707	0.365236	0.365429	0.364641	0.36457	0.36515	0.365511	0.365795	0.366071	0.366108	0.366001	0.36541	0.364143	0.363224	0.363535	0.364159	0.364162	0.364197	0.364994	0.366042	0.366351	0.365712	0.364632	0.364165	0.364838	0.365625	0.365844	0.36574	0.365806	0.366311	0.366732	0.366759	0.36662	0.366535	0.36618	0.365401	0.365128	0.365489	0.365363	0.364911
2	0.391515	0.391382	0.390739	0.390101	0.390832	0.391991	0.391965	0.390742	0.389127	0.38901	0.390149	0.39041	0.390001	0.39031	0.390891	0.390756	0.39084	0.391572	0.391549	0.390723	0.390195	0.389882	0.389586	0.389784	0.390413	0.390495	0.389872	0.389606	0.389974	0.390319	0.390247	0.389866	0.389375	0.389491	0.390471	0.391198	0.390912	0.390663	0.391216	0.391163	0.39041	0.39032	0.390541	0.390046	0.389411	0.390107	0.39113	0.390686	0.390165
2	0.386411	0.38614	0.386054	0.386415	0.387175	0.388065	0.387774	0.38572	0.383883	0.384459	0.38597	0.386364	0.386126	0.386117	0.386199	0.385927	0.385996	0.386416	0.386241	0.385618	0.384992	0.384367	0.383792	0.383957	0.384679	0.384877	0.384933	0.385624	0.386343	0.386092	0.385078	0.384161	0.383834	0.384298	0.385147	0.385898	0.386096	0.385548	0.385227	0.385711	0.386173	0.386396	0.386613	0.386209	0.385595	0.385941	0.386428	0.385742	0.384945
2	0.386441	0.386922	0.387067	0.386453	0.385895	0.386187	0.386552	0.385776	0.384642	0.385011	0.386115	0.386249	0.38594	0.386185	0.3864	0.385831	0.385383	0.385493	0.385678	0.385868	0.385728	0.385013	0.384409	0.384643	0.385127	0.385139	0.385098	0.385609	0.386362	0.386597	0.386245	0.385354	0.384387	0.384156	0.384633	0.385544	0.386235	0.386093	0.385658	0.385536	0.385696	0.386107	0.38657	0.386707	0.386599	0.386389	0.385862	0.385064	0.384631
2	0.387306	0.387643	0.387772	0.387632	0.387878	0.38877	0.389256	0.388405	0.386642	0.385999	0.387097	0.387957	0.387657	0.387299	0.387651	0.388512	0.389129	0.388853	0.388337	0.38805	0.387372	0.386221	0.385458	0.385852	0.386751	0.387127	0.387053	0.387051	0.387619	0.387945	0.38711	0.386216	0.386051	0.386589	0.387693	0.38841	0.38818	0.388004	0.388584	0.388918	0.388406	0.388097	0.388781	0.389137	0.388284	0.387564	0.387685	0.387857	0.387851
2	0.376521	0.376359	0.376394	0.376402	0.37682	0.377296	0.377047	0.37628	0.375325	0.3754	0.376516	0.377025	0.376726	0.3763	0.376257	0.376769	0.377604	0.37796	0.377259	0.376124	0.375353	0.375219	0.375615	0.375971	0.376175	0.376341	0.376212	0.376436	0.37714	0.377133	0.376445	0.375761	0.375188	0.375114	0.375827	0.376766	0.37719	0.377264	0.377363	0.377528	0.377747	0.377787	0.377545	0.376758	0.375962	0.376404	0.37724	0.376997	0.376482
2	0.381054	0.381371	0.381581	0.381351	0.381568	0.382249	0.382184	0.380949	0.379484	0.379379	0.380116	0.380388	0.380622	0.380861	0.38056	0.380073	0.380369	0.381141	0.381405	0.381351	0.381248	0.380829	0.380481	0.380734	0.381098	0.380872	0.38028	0.380346	0.38099	0.381112	0.380734	0.380122	0.379496	0.379664	0.380311	0.380498	0.380648	0.381677	0.382511	0.381864	0.381153	0.381311	0.381301	0.380889	0.381105	0.381983	0.38176	0.380081	0.379182
2	0.373313	0.373264	0.373299	0.373487	0.373626	0.373724	0.373649	0.372889	0.371794	0.371836	0.372698	0.373031	0.372826	0.372772	0.372948	0.372919	0.373297	0.374165	0.374212	0.373339	0.372632	0.372398	0.372333	0.372443	0.372515	0.371952	0.371395	0.372219	0.37366	0.373893	0.372853	0.3716	0.371061	0.371572	0.372622	0.373453	0.373624	0.373564	0.373768	0.373722	0.373524	0.373896	0.374204	0.373791	0.373479	0.3736	0.373413	0.372843	0.37286
2	0.412325	0.412887	0.412719	0.412088	0.412091	0.412813	0.413393	0.412728	0.411248	0.411111	0.412303	0.412834	0.412674	0.412907	0.413139	0.412842	0.412875	0.413118	0.412545	0.411729	0.411579	0.411614	0.411465	0.411855	0.412531	0.412124	0.410786	0.410469	0.411764	0.412603	0.411917	0.411065	0.410999	0.411238	0.411352	0.41147	0.411346	0.411377	0.412168	0.412905	0.412828	0.412363	0.412305	0.412205	0.411486	0.411371	0.412246	0.412566	0.412296
2	0.41114	0.412104	0.412372	0.411588	0.411335	0.412185	0.412757	0.412033	0.410741	0.410769	0.411703	0.411493	0.410803	0.41134	0.412372	0.412594	0.412645	0.412764	0.412158	0.411417	0.411291	0.41125	0.411057	0.411076	0.411194	0.410986	0.410652	0.410995	0.411878	0.412334	0.411883	0.410628	0.409701	0.410119	0.411048	0.411806	0.412562	0.412899	0.412957	0.413031	0.412842	0.412729	0.412753	0.412335	0.411706	0.411796	0.412058	0.411247	0.410737
2	0.389557	0.389909	0.389238	0.388178	0.388424	0.389392	0.38926	0.387916	0.386605	0.387205	0.388757	0.388727	0.388024	0.388233	0.388442	0.387923	0.387839	0.388336	0.388451	0.388388	0.388375	0.388024	0.387319	0.386926	0.387299	0.387832	0.387908	0.387974	0.388332	0.388252	0.387539	0.386675	0.386163	0.386668	0.387527	0.38769	0.387749	0.388316	0.388888	0.38929	0.389573	0.389501	0.389523	0.389545	0.388859	0.38831	0.388298	0.387732	0.387437
2	0.377864	0.37744	0.376644	0.376118	0.376207	0.37682	0.377254	0.376757	0.375718	0.37585	0.376865	0.377148	0.377048	0.377465	0.377982	0.377933	0.377749	0.377313	0.376359	0.375554	0.375479	0.375558	0.374797	0.374222	0.374773	0.375347	0.375421	0.37593	0.376994	0.37754	0.377086	0.375943	0.375165	0.375684	0.376785	0.377354	0.377263	0.377116	0.377198	0.377325	0.377438	0.377246	0.37697	0.376896	0.376948	0.377492	0.377972	0.377576	0.377094
2	0.425582	0.425409	0.425283	0.425238	0.42556	0.426104	0.42627	0.425674	0.425058	0.42557	0.426387	0.426245	0.425553	0.425379	0.425786	0.42578	0.42542	0.425365	0.425554	0.42557	0.425302	0.424948	0.424641	0.424643	0.424837	0.424559	0.423918	0.424046	0.424946	0.425499	0.425361	0.424495	0.42349	0.42363	0.424833	0.42609	0.426356	0.425902	0.426138	0.426549	0.426341	0.426072	0.425876	0.425461	0.425103	0.425163	0.425114	0.424688	0.424648
2	0.413275	0.412588	0.41286	0.413728	0.414386	0.414704	0.41431	0.412872	0.411648	0.41218	0.413458	0.413591	0.412974	0.413208	0.413916	0.413708	0.413317	0.413413	0.413181	0.412705	0.412792	0.41303	0.412837	0.412884	0.413502	0.413678	0.41298	0.41253	0.41281	0.413075	0.412682	0.411752	0.411025	0.41114	0.411813	0.4122	0.412312	0.413008	0.414202	0.414577	0.413935	0.413213	0.412726	0.412454	0.412713	0.413491	0.413916	0.413532	0.413278
2	0.383999	0.383851	0.383649	0.383597	0.383804	0.384703	0.385498	0.384435	0.382042	0.381311	0.38287	0.384343	0.384724	0.384913	0.385173	0.384774	0.383898	0.383636	0.384264	0.384716	0.384276	0.383544	0.383227	0.383484	0.383758	0.383758	0.383952	0.384344	0.38465	0.384665	0.383954	0.382616	0.381627	0.381603	0.382435	0.383683	0.384329	0.384429	0.384733	0.384808	0.384435	0.384058	0.384245	0.384702	0.384812	0.385147	0.385354	0.384726	0.384316
2	0.399382	0.399122	0.398764	0.398556	0.398851	0.399743	0.400633	0.400041	0.398423	0.398078	0.398617	0.398714	0.398809	0.399356	0.400027	0.400043	0.399895	0.400419	0.40073	0.399878	0.398603	0.397897	0.397744	0.398237	0.399201	0.399619	0.399225	0.399124	0.399819	0.400482	0.400449	0.399616	0.39857	0.398418	0.399079	0.399501	0.399332	0.399192	0.399633	0.400176	0.400265	0.40002	0.399768	0.399378	0.398968	0.399056	0.399298	0.399355	0.399616
2	0.386341	0.386247	0.386521	0.386751	0.387125	0.387951	0.388259	0.38688	0.384577	0.38412	0.385569	0.386398	0.386202	0.386235	0.386368	0.385795	0.385482	0.386229	0.386875	0.386524	0.385952	0.385253	0.384289	0.384376	0.385418	0.385846	0.385731	0.38604	0.386557	0.386761	0.386458	0.385444	0.384321	0.384364	0.385345	0.386053	0.386232	0.386172	0.386072	0.38612	0.386228	0.385974	0.385815	0.385839	0.385545	0.385686	0.386248	0.386181	0.386028
2	0.372486	0.372273	0.371754	0.370997	0.371529	0.373093	0.373391	0.371946	0.37042	0.370594	0.3717	0.371868	0.371511	0.371442	0.371525	0.371407	0.371273	0.371605	0.371959	0.371795	0.371518	0.371392	0.371292	0.371189	0.37068	0.370049	0.370307	0.371594	0.372588	0.37212	0.371181	0.370609	0.370051	0.369783	0.369923	0.370156	0.370511	0.371223	0.372104	0.372355	0.371967	0.371741	0.371751	0.371286	0.370722	0.371216	0.371804	0.371223	0.370747
2	0.315661	0.315456	0.314866	0.314472	0.314801	0.315234	0.315265	0.315031	0.315046	0.315492	0.315956	0.315893	0.31531	0.314914	0.315303	0.316142	0.316376	0.315689	0.315147	0.31518	0.315047	0.314531	0.314191	0.314605	0.315296	0.315499	0.315674	0.316191	0.316726	0.317123	0.3171	0.316745	0.316574	0.316862	0.317487	0.31776	0.317607	0.317368	0.317256	0.317675	0.318008	0.317874	0.318067	0.318409	0.318307	0.318099	0.318293	0.318835	0.319057
2	0.317489	0.316964	0.316415	0.31607	0.316216	0.316562	0.316883	0.317154	0.317296	0.317045	0.316334	0.315863	0.316378	0.317463	0.318108	0.318313	0.318184	0.317552	0.317108	0.316837	0.316427	0.316516	0.316814	0.317041	0.317473	0.317833	0.318106	0.318635	0.319227	0.319147	0.318697	0.318556	0.318485	0.318532	0.318736	0.318855	0.319128	0.319306	0.318914	0.318592	0.318788	0.319401	0.320127	0.32029	0.320184	0.320483	0.320644	0.32022	0.319972
2	0.259878	0.259793	0.2594	0.259226	0.259631	0.259886	0.259931	0.260186	0.260511	0.260843	0.260833	0.260397	0.260191	0.260244	0.260442	0.260894	0.261032	0.260819	0.26084	0.260935	0.260992	0.261117	0.261227	0.261691	0.262061	0.261728	0.261518	0.261826	0.262084	0.262023	0.261645	0.261342	0.261777	0.262428	0.262564	0.262552	0.262798	0.263164	0.263335	0.263423	0.263588	0.263894	0.264282	0.264518	0.264737	0.265136	0.265259	0.264885	0.264714
2	0.331379	0.331271	0.330978	0.33069	0.330611	0.330951	0.331382	0.331518	0.331551	0.33155	0.331039	0.330236	0.330425	0.331479	0.331981	0.331705	0.331233	0.331015	0.331143	0.331458	0.332095	0.33275	0.332677	0.332352	0.332416	0.332447	0.332483	0.332724	0.332766	0.332604	0.332422	0.332337	0.332722	0.333605	0.334303	0.334192	0.33379	0.333696	0.333908	0.334531	0.33488	0.334882	0.335231	0.335378	0.335308	0.335334	0.334998	0.334614	0.334868
2	0.286601	0.286699	0.285871	0.284757	0.284704	0.285181	0.285246	0.285314	0.285951	0.286731	0.286646	0.286035	0.286267	0.286778	0.286584	0.286474	0.286771	0.286677	0.286208	0.286142	0.286365	0.286057	0.285278	0.285101	0.285734	0.286238	0.286456	0.286958	0.287455	0.287367	0.287063	0.286988	0.286889	0.286893	0.287487	0.288219	0.288675	0.288911	0.288743	0.288566	0.288483	0.288424	0.288917	0.289358	0.28943	0.289918	0.290322	0.290092	0.289658
2	0.288738	0.288511	0.287863	0.287071	0.287256	0.287972	0.288175	0.288079	0.287783	0.287807	0.288159	0.288024	0.287986	0.288442	0.289064	0.289739	0.28964	0.288838	0.288655	0.288969	0.288962	0.288733	0.288561	0.288611	0.288807	0.289062	0.28938	0.289683	0.289889	0.289769	0.289643	0.289694	0.289484	0.289586	0.29037	0.290808	0.290514	0.290139	0.289997	0.289974	0.290125	0.290866	0.291862	0.292298	0.292313	0.292137	0.291766	0.291644	0.292084
2	0.275015	0.274872	0.274334	0.274265	0.274734	0.275059	0.275047	0.274832	0.274577	0.274564	0.274481	0.274245	0.27472	0.275352	0.275042	0.274779	0.275233	0.27542	0.275339	0.275596	0.275448	0.274655	0.274452	0.275074	0.275468	0.275113	0.274664	0.27496	0.275649	0.276049	0.27619	0.276563	0.27707	0.277189	0.277142	0.276933	0.276813	0.277112	0.277256	0.277065	0.2769	0.27736	0.278318	0.278852	0.278964	0.279057	0.278832	0.278417	0.278581
2	0.315687	0.315969	0.31529	0.314378	0.314206	0.314416	0.314396	0.314262	0.314493	0.315064	0.315034	0.31464	0.315005	0.315525	0.315552	0.315506	0.315586	0.315906	0.316266	0.315932	0.315021	0.314458	0.314363	0.314664	0.315053	0.314999	0.315187	0.315968	0.316556	0.31672	0.316667	0.316424	0.316285	0.316704	0.317403	0.317555	0.31723	0.31709	0.316912	0.316354	0.316116	0.31681	0.317656	0.317941	0.318162	0.318641	0.318872	0.318739	0.318775
2	0.312854	0.31263	0.312071	0.311777	0.312214	0.31265	0.31225	0.311827	0.312161	0.312468	0.312112	0.311747	0.311948	0.31221	0.312417	0.312984	0.313262	0.312749	0.312219	0.312254	0.312621	0.313032	0.313454	0.313654	0.313292	0.312944	0.313271	0.313803	0.314093	0.314097	0.313757	0.313627	0.314108	0.314515	0.314602	0.314932	0.315312	0.315237	0.314903	0.314584	0.314516	0.315059	0.315857	0.316063	0.315971	0.316419	0.316701	0.316051	0.315579
2	0.294952	0.295154	0.294623	0.293881	0.293547	0.29348	0.293396	0.293404	0.293923	0.29467	0.294889	0.294647	0.294922	0.295493	0.295232	0.294872	0.294992	0.295036	0.295342	0.295576	0.295206	0.295087	0.295417	0.295831	0.295945	0.295457	0.29506	0.295255	0.295557	0.29574	0.296025	0.296132	0.29605	0.296202	0.29622	0.295993	0.296288	0.297073	0.297495	0.297289	0.29716	0.297856	0.298761	0.298819	0.298719	0.299228	0.299064	0.298182	0.298173
2	0.263192	0.263526	0.262981	0.26247	0.263028	0.26429	0.264917	0.264388	0.263774	0.263853	0.264017	0.263897	0.263892	0.263946	0.263867	0.263979	0.264131	0.264269	0.264641	0.26466	0.264192	0.263764	0.263633	0.264004	0.264427	0.264281	0.264058	0.264582	0.265466	0.265639	0.264988	0.264294	0.264168	0.264738	0.265575	0.266089	0.266125	0.265641	0.265174	0.2654	0.2658	0.266162	0.266694	0.26696	0.267016	0.267199	0.267143	0.266738	0.266623
2	0.277229	0.277572	0.277376	0.276675	0.276617	0.277287	0.277561	0.277201	0.277087	0.277433	0.277658	0.277725	0.277766	0.277593	0.277731	0.278555	0.279007	0.278692	0.278567	0.278711	0.278686	0.27856	0.278334	0.278283	0.278259	0.277771	0.27755	0.278387	0.279228	0.279016	0.278596	0.278804	0.279312	0.279791	0.28015	0.280065	0.279737	0.279596	0.279391	0.279098	0.279384	0.280316	0.280935	0.280773	0.280541	0.280977	0.281166	0.280354	0.279813
2	0.314067	0.313637	0.312858	0.312339	0.312322	0.312588	0.313205	0.313833	0.313966	0.313822	0.313323	0.31281	0.313184	0.31391	0.31408	0.314105	0.31454	0.314993	0.314961	0.31446	0.31369	0.31289	0.312584	0.313093	0.313627	0.313629	0.313567	0.313861	0.314304	0.314289	0.313962	0.313963	0.314356	0.315089	0.315907	0.315936	0.315377	0.315352	0.315676	0.315703	0.315564	0.31596	0.316901	0.317412	0.31732	0.317168	0.317051	0.316763	0.31644
2	0.260925	0.260028	0.259138	0.259264	0.259987	0.260415	0.26042	0.260392	0.260682	0.261129	0.260997	0.260295	0.260188	0.260688	0.260943	0.26111	0.261056	0.260599	0.260438	0.26046	0.26021	0.260085	0.260017	0.260043	0.260484	0.260828	0.260896	0.261091	0.261461	0.261872	0.262238	0.262143	0.261487	0.261281	0.261895	0.262304	0.26234	0.262512	0.262554	0.262417	0.26243	0.262939	0.263763	0.263985	0.263744	0.263845	0.263794	0.26324	0.262991
2	0.301876	0.301779	0.30125	0.300465	0.300434	0.300793	0.300746	0.30055	0.300575	0.300651	0.300476	0.300178	0.300221	0.300338	0.300257	0.300738	0.301692	0.302254	0.302338	0.302133	0.301809	0.301411	0.300946	0.300843	0.301026	0.301176	0.301495	0.302101	0.302674	0.302646	0.302309	0.302342	0.302484	0.302327	0.302145	0.302027	0.301873	0.302109	0.302736	0.303097	0.302885	0.303075	0.304261	0.305081	0.304726	0.30399	0.303311	0.302741	0.302765
2	0.298415	0.297985	0.297694	0.297698	0.297991	0.297933	0.297625	0.29779	0.298275	0.298561	0.29848	0.298198	0.298175	0.298298	0.298427	0.298789	0.298842	0.298221	0.297744	0.29768	0.297563	0.29748	0.29779	0.29836	0.298603	0.298666	0.298899	0.299221	0.299614	0.29993	0.300045	0.299929	0.299628	0.299413	0.29963	0.299973	0.300111	0.300297	0.300442	0.300232	0.299717	0.29957	0.300097	0.300462	0.300381	0.300627	0.301245	0.301416	0.301084
2	0.301441	0.30138	0.30105	0.300779	0.301168	0.301464	0.301285	0.301334	0.301509	0.30159	0.301677	0.301914	0.302367	0.302676	0.302707	0.302907	0.303202	0.303088	0.302793	0.302519	0.302319	0.302302	0.302382	0.302879	0.303434	0.303108	0.302477	0.302546	0.302863	0.30291	0.302949	0.302844	0.302779	0.303542	0.304619	0.304852	0.304478	0.304368	0.304487	0.304465	0.304406	0.304651	0.305081	0.305319	0.305605	0.305792	0.305274	0.304819	0.305333
2	0.270609	0.271044	0.270527	0.269716	0.269526	0.269896	0.270287	0.270464	0.27082	0.27154	0.271938	0.27172	0.271479	0.27106	0.270405	0.270585	0.271429	0.271502	0.270715	0.270267	0.270618	0.271089	0.271244	0.271371	0.271189	0.270565	0.270592	0.271532	0.272121	0.271835	0.271492	0.271495	0.271774	0.272148	0.272438	0.272855	0.273031	0.272648	0.272061	0.271556	0.271568	0.272175	0.272884	0.273371	0.27384	0.274407	0.274296	0.273652	0.273589
2	0.315294	0.315791	0.315335	0.314661	0.314558	0.314371	0.314118	0.31444	0.315172	0.315679	0.315624	0.315432	0.315433	0.315197	0.314922	0.315098	0.315162	0.314954	0.315181	0.315667	0.315799	0.315852	0.315928	0.316037	0.316227	0.316074	0.31584	0.316124	0.316656	0.316919	0.316942	0.316898	0.316791	0.316849	0.317361	0.317883	0.317949	0.317687	0.317189	0.316814	0.316872	0.317443	0.318132	0.318043	0.317648	0.317998	0.318534	0.318564	0.318653
2	0.312818	0.312426	0.311277	0.311	0.312076	0.312696	0.312349	0.312084	0.312356	0.313101	0.313593	0.3135	0.31339	0.313463	0.313725	0.314346	0.314858	0.314816	0.314459	0.313724	0.313174	0.313186	0.313061	0.313079	0.313386	0.313534	0.313736	0.314137	0.314387	0.314253	0.314096	0.314194	0.314175	0.313769	0.31353	0.314012	0.314687	0.314972	0.314895	0.314694	0.314884	0.315687	0.316428	0.3165	0.316561	0.317191	0.317404	0.316785	0.316412
2	0.289361	0.288995	0.288138	0.287465	0.287845	0.288419	0.288331	0.288331	0.288808	0.289264	0.289321	0.28889	0.288533	0.288596	0.289074	0.289965	0.290392	0.290159	0.28998	0.289659	0.289032	0.288648	0.288959	0.289858	0.29064	0.290745	0.290502	0.290579	0.291001	0.291429	0.291564	0.291122	0.290544	0.290545	0.290921	0.291349	0.291844	0.292263	0.292434	0.292065	0.291469	0.291657	0.292223	0.292127	0.291945	0.292285	0.292508	0.292254	0.292144
2	0.284926	0.285396	0.285441	0.285372	0.285618	0.285715	0.285767	0.286081	0.286367	0.286777	0.286957	0.286229	0.285568	0.286013	0.287015	0.287549	0.287279	0.286813	0.286648	0.286667	0.286626	0.286421	0.28642	0.286789	0.286773	0.286367	0.286526	0.287334	0.287819	0.287532	0.28726	0.287412	0.287772	0.28809	0.288092	0.288162	0.288689	0.289053	0.288915	0.288812	0.289012	0.289727	0.290544	0.290502	0.290124	0.290402	0.290511	0.289832	0.289455
2	0.287543	0.287465	0.286698	0.285742	0.285568	0.286033	0.286205	0.286195	0.286607	0.287129	0.287172	0.286974	0.286904	0.286983	0.287438	0.288153	0.288389	0.287879	0.287187	0.286941	0.286911	0.286461	0.28596	0.286415	0.287372	0.287743	0.287769	0.287987	0.288387	0.288541	0.288435	0.288518	0.288694	0.289118	0.289731	0.289957	0.289961	0.289815	0.289537	0.289441	0.289411	0.289805	0.290517	0.290643	0.290581	0.290859	0.290915	0.290434	0.289919
2	0.290789	0.290669	0.290071	0.289276	0.289	0.289063	0.288957	0.289076	0.289996	0.290893	0.290779	0.290335	0.290425	0.290648	0.290652	0.290998	0.291667	0.291865	0.29162	0.291297	0.291089	0.291184	0.291128	0.290859	0.290589	0.290345	0.290667	0.291508	0.292077	0.292138	0.291906	0.291434	0.29119	0.291713	0.292416	0.2928	0.293179	0.293372	0.293094	0.292673	0.292395	0.292398	0.292693	0.293142	0.293638	0.294158	0.294362	0.29398	0.293577
2	0.292584	0.292625	0.292832	0.293099	0.29339	0.293374	0.293072	0.29272	0.292778	0.293424	0.293552	0.293112	0.293257	0.293615	0.293812	0.294575	0.295401	0.295209	0.294713	0.294595	0.29433	0.293993	0.293992	0.294392	0.294546	0.29378	0.293033	0.293316	0.294091	0.294678	0.295042	0.295293	0.295511	0.295747	0.296151	0.296827	0.297303	0.297037	0.296519	0.296159	0.295834	0.296416	0.297787	0.298121	0.297477	0.297014	0.296527	0.295908	0.295809
2	0.284952	0.285216	0.284888	0.284416	0.284278	0.284416	0.284706	0.284812	0.284877	0.285224	0.285101	0.284546	0.284747	0.28527	0.285243	0.285436	0.285829	0.285677	0.285591	0.28573	0.285875	0.286216	0.286174	0.285816	0.285701	0.285651	0.285738	0.286207	0.286528	0.286192	0.285835	0.286099	0.286798	0.287447	0.287681	0.287603	0.287782	0.28826	0.288469	0.288252	0.287865	0.288073	0.288745	0.288803	0.288535	0.288582	0.288598	0.288626	0.289305
2	0.275425	0.275458	0.275294	0.274828	0.274775	0.275008	0.275327	0.275787	0.276144	0.276338	0.275986	0.275438	0.275758	0.276213	0.276316	0.276675	0.276724	0.276232	0.275825	0.275544	0.275512	0.275709	0.275778	0.275806	0.275793	0.275654	0.2756	0.276038	0.276712	0.27689	0.276788	0.276709	0.27655	0.276712	0.277517	0.278328	0.278327	0.277752	0.277335	0.277378	0.277551	0.277925	0.278851	0.279534	0.279663	0.279699	0.279362	0.278684	0.278352
2	0.251957	0.252339	0.251956	0.251447	0.251505	0.251642	0.25174	0.251903	0.251831	0.252016	0.25273	0.253365	0.253521	0.252918	0.252376	0.253111	0.254113	0.254006	0.253451	0.253309	0.253307	0.253141	0.252972	0.252951	0.25308	0.253246	0.253307	0.253517	0.253817	0.253819	0.253895	0.254008	0.253797	0.253878	0.254455	0.254852	0.254946	0.254868	0.254699	0.254941	0.255428	0.255724	0.256052	0.256228	0.256166	0.256248	0.256273	0.256091	0.255949
2	0.297203	0.297853	0.297551	0.296881	0.296551	0.29634	0.296311	0.296788	0.297308	0.297014	0.296055	0.295634	0.296081	0.296926	0.297918	0.298478	0.298295	0.297758	0.297583	0.297872	0.297615	0.296765	0.296895	0.298003	0.29862	0.298699	0.298462	0.297769	0.297265	0.297409	0.297656	0.297585	0.297574	0.297999	0.298649	0.299014	0.298854	0.298472	0.298402	0.298884	0.299713	0.300412	0.300723	0.300549	0.30023	0.300315	0.300729	0.301257	0.301465
2	0.29796	0.297876	0.297612	0.297315	0.29742	0.297703	0.298047	0.298605	0.299078	0.299189	0.298993	0.298719	0.298735	0.298919	0.299105	0.299417	0.299456	0.298788	0.298047	0.298101	0.298432	0.298413	0.298435	0.298714	0.29931	0.299785	0.299346	0.298559	0.298376	0.298608	0.298817	0.29916	0.299801	0.300408	0.300844	0.300892	0.300397	0.300294	0.300799	0.301066	0.301304	0.30186	0.302374	0.302646	0.30279	0.302849	0.302771	0.30295	0.303369
2	0.297667	0.29787	0.298317	0.298529	0.298193	0.29771	0.298248	0.299476	0.299702	0.298962	0.298592	0.298402	0.297781	0.29778	0.298959	0.299936	0.299614	0.298586	0.29788	0.298045	0.298828	0.299527	0.299807	0.299632	0.299754	0.300356	0.300095	0.299145	0.298946	0.299301	0.299363	0.299384	0.299731	0.300132	0.300387	0.300267	0.300012	0.300337	0.300948	0.301261	0.301402	0.301508	0.301418	0.300906	0.300361	0.300527	0.301043	0.301228	0.301346
2	0.269501	0.270056	0.270541	0.270308	0.26982	0.269434	0.269353	0.269765	0.27049	0.270858	0.270398	0.26986	0.270056	0.270598	0.270984	0.271023	0.270597	0.269908	0.269377	0.269546	0.270069	0.270169	0.270289	0.270724	0.271024	0.271249	0.27128	0.27096	0.271025	0.271546	0.27173	0.271755	0.272012	0.272217	0.272388	0.272373	0.271761	0.2712	0.271565	0.272551	0.273499	0.274025	0.273955	0.273545	0.273376	0.273801	0.274232	0.274246	0.274246
2	0.299842	0.299893	0.29957	0.299737	0.300087	0.299986	0.300273	0.300992	0.301003	0.300368	0.299824	0.299434	0.299434	0.300039	0.300648	0.300701	0.300565	0.300443	0.300172	0.300015	0.299914	0.299859	0.300457	0.30141	0.30176	0.301575	0.30124	0.300777	0.300617	0.30113	0.301554	0.301298	0.301068	0.30139	0.301817	0.301825	0.301525	0.301353	0.301708	0.302385	0.302761	0.302842	0.30289	0.30234	0.301323	0.3013	0.302047	0.302482	0.302844
2	0.306504	0.306812	0.306469	0.306176	0.306015	0.305553	0.305454	0.306308	0.307323	0.307323	0.306533	0.306157	0.306534	0.307103	0.307605	0.307692	0.307085	0.306525	0.306389	0.306329	0.306479	0.306914	0.307405	0.308086	0.308816	0.308866	0.308043	0.307328	0.307662	0.308371	0.308137	0.307433	0.307319	0.307596	0.307957	0.308279	0.308621	0.309022	0.309376	0.309797	0.310303	0.310734	0.310811	0.310265	0.309383	0.309258	0.310094	0.310749	0.310593
2	0.276456	0.276933	0.276853	0.276413	0.27606	0.27593	0.276492	0.277464	0.277605	0.27696	0.276394	0.276278	0.276352	0.2764	0.276856	0.27747	0.277568	0.277201	0.27692	0.276973	0.276902	0.276918	0.277235	0.2772	0.277336	0.278315	0.279085	0.278809	0.278443	0.278685	0.278547	0.278134	0.27835	0.27859	0.278573	0.27861	0.27839	0.278166	0.278566	0.279208	0.279944	0.280821	0.280926	0.280056	0.279274	0.279344	0.279882	0.280191	0.28037
2	0.279712	0.280108	0.2803	0.280915	0.281428	0.281005	0.280632	0.280968	0.281304	0.281299	0.281231	0.28114	0.280856	0.280851	0.281484	0.281955	0.281856	0.281535	0.281369	0.281543	0.281453	0.280894	0.280899	0.281586	0.28187	0.281677	0.281414	0.281098	0.281273	0.281994	0.282427	0.282616	0.282781	0.282732	0.282783	0.283005	0.282919	0.28248	0.282379	0.282943	0.283613	0.283908	0.28371	0.283168	0.283113	0.283705	0.283945	0.283898	0.284124
2	0.279333	0.2797	0.279345	0.279166	0.279521	0.279653	0.279974	0.280467	0.28044	0.280337	0.280582	0.280987	0.2813	0.281444	0.281725	0.281942	0.28144	0.280258	0.279442	0.279736	0.28011	0.279943	0.280144	0.280754	0.281369	0.281825	0.281464	0.280505	0.280439	0.281436	0.281864	0.281648	0.281918	0.282331	0.282414	0.282409	0.282493	0.282546	0.282489	0.282716	0.283425	0.283942	0.28359	0.282894	0.282928	0.283722	0.284335	0.284362	0.284261
2	0.31207	0.312097	0.311569	0.311133	0.31103	0.310989	0.311279	0.312061	0.312466	0.312081	0.311705	0.31185	0.312099	0.312364	0.312681	0.312721	0.312392	0.311807	0.311629	0.312045	0.31226	0.311899	0.311544	0.311689	0.312266	0.313032	0.31327	0.312976	0.313035	0.31347	0.31368	0.313507	0.313162	0.312891	0.312938	0.313067	0.312893	0.312841	0.313368	0.31409	0.314606	0.315158	0.315685	0.315551	0.314957	0.314868	0.315515	0.316009	0.315964
2	0.264828	0.265251	0.264434	0.263974	0.264514	0.264623	0.264318	0.264701	0.26519	0.264923	0.264316	0.264075	0.26456	0.26539	0.265978	0.266225	0.266097	0.265387	0.264655	0.264936	0.265489	0.265485	0.265938	0.266659	0.266505	0.266016	0.265622	0.264972	0.264622	0.265	0.265539	0.265947	0.265934	0.265336	0.265284	0.265962	0.266174	0.266351	0.266982	0.267203	0.267199	0.267427	0.267613	0.267712	0.267496	0.267099	0.267344	0.267927	0.267943
2	0.306021	0.306112	0.305875	0.30563	0.305691	0.30598	0.30633	0.306622	0.306507	0.305887	0.305205	0.304837	0.30483	0.305135	0.305739	0.306133	0.305922	0.305449	0.305367	0.305961	0.306421	0.30644	0.306519	0.306235	0.305795	0.306057	0.306312	0.305991	0.305883	0.306314	0.306647	0.306684	0.306837	0.307054	0.307056	0.306888	0.306574	0.306318	0.306496	0.307044	0.307877	0.308534	0.308654	0.308523	0.308327	0.308432	0.308811	0.309119	0.309102
3	0.337803	0.337366	0.337204	0.338229	0.339389	0.339372	0.33915	0.339276	0.338969	0.338488	0.338424	0.338676	0.339244	0.339536	0.339296	0.339137	0.338874	0.338344	0.338142	0.338376	0.338595	0.338713	0.338605	0.338663	0.339231	0.339451	0.339033	0.338607	0.33867	0.339094	0.339359	0.339284	0.338916	0.338561	0.338635	0.339129	0.339542	0.339582	0.339687	0.339904	0.3399	0.339862	0.340116	0.340471	0.340547	0.340562	0.340621	0.34053	0.340552
3	0.301425	0.301326	0.30138	0.301705	0.301978	0.301736	0.301425	0.30158	0.301717	0.30164	0.301612	0.301637	0.302179	0.302976	0.303286	0.303345	0.303253	0.302684	0.301844	0.301316	0.301291	0.301583	0.301909	0.302359	0.303126	0.303644	0.303407	0.302965	0.30286	0.303005	0.303247	0.303344	0.303248	0.30312	0.302967	0.302964	0.30306	0.302927	0.302823	0.303034	0.303351	0.303771	0.30436	0.304612	0.304487	0.304534	0.304704	0.304796	0.30483
3	0.331659	0.331135	0.331027	0.331737	0.332338	0.331805	0.331078	0.331068	0.331079	0.331341	0.332111	0.332581	0.332778	0.332916	0.333194	0.333592	0.333352	0.332521	0.331713	0.331156	0.330951	0.331072	0.331458	0.332282	0.332941	0.332681	0.33202	0.331627	0.331696	0.332283	0.332897	0.332801	0.332494	0.33271	0.333003	0.333126	0.333197	0.332935	0.332606	0.332671	0.332919	0.33322	0.333483	0.333436	0.333276	0.333301	0.333218	0.332835	0.332651
3	0.307385	0.307616	0.307651	0.307529	0.307418	0.307267	0.307477	0.307704	0.307632	0.307898	0.308199	0.307861	0.307709	0.307984	0.30805	0.308026	0.308159	0.308274	0.308072	0.307456	0.306823	0.306798	0.307148	0.307626	0.308184	0.308245	0.30786	0.307609	0.307678	0.30792	0.308263	0.30859	0.308554	0.308388	0.308609	0.308987	0.3091	0.308963	0.308661	0.308436	0.308739	0.309252	0.30935	0.309111	0.30906	0.309398	0.309808	0.30997	0.309715
3	0.329512	0.329108	0.328436	0.328463	0.328974	0.328831	0.328635	0.32878	0.32884	0.32916	0.329601	0.329627	0.329551	0.329476	0.329686	0.330395	0.330637	0.32998	0.328979	0.328197	0.328098	0.328794	0.329675	0.330084	0.330005	0.329984	0.330318	0.33054	0.330579	0.330854	0.330995	0.330604	0.33028	0.330512	0.331064	0.33138	0.331246	0.331159	0.331264	0.331053	0.330729	0.330892	0.331312	0.33149	0.331486	0.331587	0.331777	0.331924	0.332181
3	0.337803	0.337366	0.337204	0.338229	0.339389	0.339372	0.33915	0.339276	0.338969	0.338488	0.338424	0.338676	0.339244	0.339536	0.339296	0.339137	0.338874	0.338344	0.338142	0.338376	0.338595	0.338713	0.338605	0.338663	0.339231	0.339451	0.339033	0.338607	0.33867	0.339094	0.339359	0.339284	0.338916	0.338561	0.338635	0.339129	0.339542	0.339582	0.339687	0.339904	0.3399	0.339862	0.340116	0.340471	0.340547	0.340562	0.340621	0.34053	0.340552
3	0.321827	0.321426	0.320867	0.320885	0.32115	0.321168	0.321511	0.322053	0.322137	0.321961	0.32182	0.321557	0.321613	0.32221	0.322427	0.322042	0.32178	0.32186	0.321724	0.321212	0.320863	0.32074	0.320894	0.321731	0.322799	0.323247	0.322804	0.321971	0.32157	0.321674	0.321951	0.322213	0.322268	0.322176	0.322241	0.322587	0.323009	0.323112	0.322711	0.322453	0.32305	0.323728	0.323564	0.322895	0.322277	0.322167	0.32269	0.32328	0.323624
3	0.323551	0.323546	0.322843	0.322748	0.323649	0.32426	0.324292	0.324031	0.323513	0.323194	0.32346	0.324063	0.324584	0.324563	0.324064	0.323816	0.324137	0.324638	0.324672	0.324015	0.32331	0.32347	0.324021	0.324172	0.324204	0.324205	0.323938	0.323376	0.323133	0.323835	0.324834	0.325013	0.324544	0.324045	0.323797	0.324314	0.325058	0.325096	0.324835	0.324863	0.325071	0.325077	0.324869	0.324979	0.325404	0.325541	0.325484	0.325693	0.326255
3	0.349695	0.348798	0.348003	0.348046	0.348524	0.348855	0.349068	0.349249	0.349335	0.349375	0.349461	0.349434	0.349621	0.350223	0.350577	0.350101	0.349433	0.349506	0.349768	0.34964	0.349123	0.348706	0.349296	0.350497	0.351026	0.350813	0.350486	0.350132	0.349892	0.350083	0.350518	0.350712	0.35069	0.350771	0.351038	0.351215	0.351116	0.350867	0.350642	0.350705	0.351159	0.351702	0.351937	0.351655	0.351403	0.351878	0.35243	0.352481	0.352432
3	0.346487	0.346318	0.346187	0.346736	0.346958	0.346522	0.34656	0.346949	0.346861	0.346679	0.346658	0.346613	0.347148	0.347938	0.347946	0.347195	0.346431	0.346088	0.345828	0.345826	0.346423	0.347091	0.347088	0.346766	0.346931	0.347499	0.347904	0.347756	0.34733	0.347132	0.347247	0.347514	0.347864	0.347808	0.347448	0.347827	0.348525	0.348424	0.347786	0.347569	0.348034	0.34866	0.348957	0.34874	0.348386	0.348436	0.348649	0.348443	0.348114
3	0.330823	0.330957	0.330417	0.330317	0.330774	0.331126	0.33121	0.3311	0.330934	0.331017	0.331196	0.331229	0.331662	0.332337	0.332692	0.332719	0.332251	0.331444	0.33091	0.331005	0.331332	0.331292	0.331072	0.331533	0.33246	0.332852	0.332516	0.331827	0.331522	0.331955	0.332391	0.332119	0.33161	0.331794	0.332519	0.332807	0.332637	0.332561	0.332468	0.332344	0.332607	0.333169	0.333534	0.33344	0.333149	0.333106	0.333112	0.33293	0.332826
3	0.336505	0.33638	0.335911	0.335955	0.33629	0.33656	0.336503	0.336211	0.336303	0.336889	0.33725	0.336951	0.336881	0.337188	0.33724	0.33712	0.336975	0.336687	0.336185	0.336046	0.336262	0.336287	0.336437	0.336927	0.337188	0.337	0.336734	0.336742	0.337042	0.337216	0.33727	0.337514	0.337745	0.337791	0.338001	0.338342	0.338312	0.338049	0.337949	0.337862	0.337867	0.33834	0.338965	0.339166	0.33886	0.338555	0.338764	0.339086	0.339256
3	0.339391	0.33879	0.338225	0.338426	0.33916	0.33986	0.340304	0.34027	0.339927	0.340074	0.340488	0.340303	0.339928	0.33981	0.340146	0.340579	0.340459	0.340058	0.339702	0.339537	0.339464	0.339425	0.339299	0.339289	0.339825	0.340301	0.340192	0.339795	0.339379	0.339372	0.339887	0.340194	0.34023	0.340392	0.340485	0.340697	0.341309	0.341586	0.341037	0.340487	0.340665	0.341125	0.341428	0.341405	0.341091	0.340988	0.34115	0.341357	0.341347
3	0.326491	0.326444	0.32592	0.325948	0.326351	0.326339	0.325995	0.325962	0.326136	0.326119	0.326079	0.326162	0.326673	0.327129	0.32695	0.326536	0.326012	0.325663	0.325477	0.325164	0.325127	0.325629	0.326183	0.326511	0.326657	0.326722	0.326632	0.326059	0.32559	0.325681	0.325968	0.326242	0.326306	0.326334	0.326733	0.327234	0.327402	0.327096	0.326636	0.326763	0.32732	0.327403	0.327028	0.326654	0.326428	0.326425	0.326588	0.326966	0.327272
3	0.34984	0.349289	0.348266	0.348248	0.349297	0.349799	0.349966	0.350318	0.350145	0.349818	0.350091	0.350342	0.350614	0.351107	0.35091	0.350155	0.349629	0.34955	0.349698	0.349621	0.349227	0.349285	0.349966	0.350403	0.350292	0.350181	0.350251	0.350021	0.34985	0.350112	0.350283	0.350198	0.350177	0.350328	0.350656	0.351232	0.351689	0.351489	0.350557	0.349854	0.350293	0.351085	0.351452	0.351569	0.351591	0.351474	0.351237	0.351283	0.35157
3	0.320991	0.320432	0.320095	0.320213	0.320485	0.320539	0.320683	0.321129	0.321136	0.320721	0.320692	0.320987	0.32137	0.321605	0.32152	0.32117	0.321017	0.321526	0.321714	0.320941	0.320095	0.320128	0.320907	0.321561	0.321801	0.321893	0.321828	0.321641	0.321763	0.3221	0.322133	0.321952	0.321778	0.321662	0.321851	0.322118	0.32226	0.32252	0.32266	0.322339	0.322089	0.322369	0.322818	0.323104	0.323122	0.323022	0.322913	0.322855	0.323225
3	0.32026	0.319765	0.319423	0.319431	0.319598	0.32005	0.32082	0.321191	0.321027	0.320889	0.320802	0.3207	0.321217	0.322004	0.322134	0.321694	0.321106	0.320771	0.32073	0.320864	0.321118	0.321461	0.321557	0.321454	0.321731	0.322255	0.322338	0.321889	0.321741	0.322112	0.322424	0.322394	0.322095	0.322076	0.322457	0.322499	0.322391	0.32271	0.322797	0.322284	0.322093	0.322485	0.322806	0.322864	0.322843	0.322788	0.32263	0.322612	0.322876
3	0.324027	0.323435	0.322811	0.322917	0.323521	0.323844	0.323984	0.32414	0.323963	0.323588	0.32345	0.323347	0.323631	0.324202	0.324413	0.324569	0.32465	0.324583	0.324387	0.323969	0.323648	0.323711	0.323974	0.324371	0.324774	0.324762	0.324276	0.323629	0.323443	0.323831	0.324229	0.324403	0.324297	0.323971	0.324104	0.324699	0.325194	0.325707	0.326099	0.326052	0.32585	0.325633	0.32539	0.32513	0.324778	0.324637	0.324762	0.324826	0.324909
3	0.342924	0.342688	0.342502	0.342746	0.343222	0.343083	0.342755	0.343016	0.343381	0.343533	0.343628	0.343471	0.343707	0.344417	0.344586	0.344234	0.344058	0.344059	0.34366	0.343151	0.342863	0.34272	0.342785	0.343227	0.343924	0.344514	0.344967	0.345091	0.344979	0.344926	0.344726	0.344147	0.343561	0.343589	0.344087	0.344325	0.344352	0.344381	0.344209	0.34427	0.344635	0.344772	0.344812	0.345052	0.345303	0.345325	0.34525	0.345268	0.345238
3	0.322614	0.322531	0.322202	0.32244	0.32303	0.323342	0.323619	0.323673	0.323357	0.323141	0.323032	0.322765	0.322966	0.323656	0.324223	0.324699	0.324704	0.324094	0.323341	0.323128	0.32359	0.32393	0.323911	0.324033	0.324099	0.323941	0.323884	0.323844	0.323791	0.323784	0.32363	0.323267	0.32321	0.323624	0.324075	0.324375	0.324511	0.324539	0.324354	0.323987	0.324096	0.324721	0.325149	0.325162	0.324894	0.324513	0.324425	0.325066	0.325776
3	0.320402	0.319877	0.319718	0.32042	0.321005	0.320637	0.32017	0.320388	0.320803	0.320799	0.320436	0.320049	0.320426	0.321233	0.321557	0.32151	0.321263	0.321138	0.321047	0.32073	0.320395	0.320499	0.320911	0.321152	0.321306	0.321645	0.321989	0.321762	0.321458	0.321734	0.322058	0.322103	0.32221	0.322207	0.322038	0.322072	0.322121	0.322171	0.322151	0.321883	0.322009	0.322715	0.323008	0.322684	0.322621	0.322797	0.323017	0.323686	0.324165
3	0.355845	0.355704	0.355067	0.354591	0.354698	0.35519	0.35576	0.355917	0.355518	0.355194	0.355076	0.354666	0.354546	0.354961	0.355016	0.35474	0.354564	0.35448	0.354448	0.354535	0.354553	0.354772	0.355555	0.356154	0.355779	0.35512	0.354936	0.354698	0.35453	0.354942	0.355454	0.355526	0.355357	0.355429	0.355783	0.356031	0.356145	0.356412	0.35654	0.356445	0.356627	0.356922	0.35673	0.356194	0.355927	0.35619	0.356651	0.357027	0.357283
3	0.338104	0.337932	0.337809	0.338131	0.338799	0.338711	0.338071	0.338009	0.338361	0.338807	0.339067	0.338544	0.338189	0.338788	0.339426	0.339577	0.339338	0.339023	0.338651	0.338272	0.338302	0.338915	0.339533	0.339774	0.339702	0.339472	0.339378	0.339149	0.338905	0.338842	0.338819	0.338969	0.339139	0.339218	0.339605	0.340201	0.340495	0.34056	0.340365	0.339882	0.339717	0.340228	0.340875	0.340968	0.340743	0.3407	0.340624	0.340502	0.340333
3	0.331019	0.331096	0.331087	0.3308	0.330912	0.331682	0.332142	0.331507	0.330435	0.330636	0.331677	0.331775	0.331416	0.331889	0.332744	0.332898	0.332978	0.333449	0.333259	0.332274	0.331313	0.330724	0.330611	0.331197	0.331705	0.33153	0.331465	0.331967	0.332695	0.332984	0.332512	0.331668	0.331436	0.332233	0.333184	0.333614	0.333478	0.333492	0.334098	0.334332	0.333903	0.333401	0.333158	0.333276	0.333583	0.334237	0.334714	0.334121	0.333745
3	0.349035	0.349016	0.348775	0.34835	0.34839	0.349264	0.349981	0.349487	0.348313	0.348367	0.349489	0.349995	0.349987	0.350178	0.350284	0.350367	0.350794	0.350721	0.350019	0.349641	0.349576	0.3493	0.348817	0.348882	0.349516	0.349664	0.349254	0.349321	0.350078	0.350813	0.35094	0.35024	0.349272	0.349033	0.34963	0.350105	0.349968	0.350018	0.350518	0.350798	0.351042	0.351315	0.351294	0.351285	0.351377	0.351734	0.351955	0.351294	0.350872
3	0.318692	0.318916	0.319006	0.318529	0.318439	0.319372	0.320124	0.319366	0.31763	0.317618	0.319218	0.319865	0.31955	0.319455	0.319733	0.319679	0.319386	0.31984	0.320673	0.320836	0.32038	0.319633	0.318783	0.318648	0.31931	0.319889	0.320221	0.320586	0.320926	0.321054	0.320919	0.320085	0.318791	0.318477	0.319326	0.320314	0.320833	0.321055	0.321398	0.321677	0.321962	0.322372	0.322238	0.321368	0.320618	0.320878	0.32153	0.321377	0.321097
3	0.321832	0.32137	0.321068	0.320904	0.321129	0.322079	0.322517	0.32093	0.318635	0.31861	0.320269	0.321171	0.321307	0.321615	0.321767	0.321252	0.320859	0.321101	0.321501	0.321615	0.321261	0.320397	0.319708	0.32016	0.321065	0.321597	0.321983	0.322337	0.322628	0.322525	0.322071	0.321372	0.320547	0.320559	0.321406	0.322273	0.322769	0.322962	0.323179	0.323009	0.322699	0.323165	0.323623	0.323222	0.322737	0.322912	0.323286	0.32299	0.322541
3	0.333384	0.333018	0.332568	0.332486	0.332987	0.333906	0.334324	0.333399	0.33182	0.331821	0.333155	0.333647	0.333282	0.333174	0.33344	0.333534	0.333626	0.333985	0.334163	0.333776	0.333086	0.332547	0.33227	0.332582	0.333274	0.333403	0.333028	0.33309	0.333899	0.334648	0.33436	0.333176	0.332254	0.332094	0.332499	0.333253	0.333644	0.333799	0.334337	0.334578	0.334104	0.333659	0.333834	0.334402	0.334908	0.335336	0.33551	0.335242	0.335098
3	0.309141	0.309209	0.308857	0.308714	0.309201	0.309697	0.309701	0.30876	0.307511	0.308025	0.309426	0.309699	0.309593	0.309954	0.310127	0.309798	0.309734	0.310325	0.310799	0.310457	0.30949	0.308628	0.308493	0.308829	0.309258	0.309603	0.309561	0.309505	0.309713	0.30962	0.309087	0.308518	0.30842	0.309006	0.309602	0.309881	0.310343	0.31124	0.312163	0.312276	0.311464	0.310972	0.311452	0.31159	0.310951	0.31101	0.311551	0.311442	0.311582
3	0.30695	0.307144	0.307014	0.306679	0.307105	0.308221	0.3088	0.307965	0.30667	0.307051	0.308372	0.308459	0.308142	0.308776	0.309396	0.309034	0.308532	0.30859	0.308796	0.308669	0.308183	0.307754	0.307749	0.308305	0.308618	0.307903	0.307103	0.307742	0.309422	0.309938	0.309051	0.308244	0.307916	0.307846	0.30811	0.308641	0.308908	0.309201	0.309794	0.310109	0.310304	0.310788	0.311069	0.310482	0.309534	0.309433	0.309957	0.309845	0.309578
3	0.288284	0.288672	0.289023	0.288956	0.289002	0.289812	0.290261	0.289483	0.28838	0.288478	0.289578	0.28992	0.289429	0.289318	0.289402	0.289062	0.28884	0.289095	0.2892	0.288906	0.288664	0.28843	0.288367	0.289168	0.290003	0.289731	0.289071	0.28927	0.290152	0.290531	0.290084	0.289264	0.288808	0.289218	0.290088	0.290574	0.290432	0.290461	0.290852	0.291016	0.290854	0.290687	0.29086	0.291	0.290763	0.291052	0.291767	0.291421	0.290975
3	0.346418	0.346161	0.345786	0.345297	0.345675	0.346822	0.347441	0.346726	0.345465	0.345951	0.347787	0.348129	0.346899	0.346206	0.346528	0.346787	0.347103	0.347466	0.346997	0.34629	0.346095	0.345954	0.345665	0.346007	0.346974	0.347252	0.346713	0.346741	0.347691	0.348656	0.348849	0.347797	0.346249	0.345786	0.346681	0.34767	0.34781	0.347748	0.348133	0.348561	0.348667	0.348563	0.348538	0.348536	0.348578	0.348951	0.349011	0.348283	0.3479
3	0.308926	0.308955	0.308899	0.308926	0.309464	0.310162	0.309948	0.308406	0.306903	0.307208	0.308255	0.308528	0.308676	0.309133	0.309552	0.309536	0.309175	0.309081	0.309203	0.308987	0.308553	0.308022	0.307573	0.308022	0.308897	0.308927	0.308603	0.309232	0.31038	0.310721	0.310059	0.308992	0.308274	0.308424	0.309145	0.30962	0.309825	0.310502	0.311322	0.311463	0.311413	0.311422	0.31119	0.310954	0.310829	0.311154	0.311666	0.311586	0.311509
3	0.303287	0.303026	0.30305	0.303329	0.303935	0.305003	0.305459	0.30429	0.30264	0.302749	0.303792	0.303611	0.303052	0.303449	0.304207	0.304698	0.305055	0.305158	0.304955	0.304588	0.303937	0.303074	0.302728	0.30352	0.304364	0.304278	0.304085	0.304634	0.305586	0.305869	0.305311	0.304325	0.303531	0.303671	0.304235	0.304421	0.304341	0.304728	0.305662	0.3062	0.306157	0.306208	0.306519	0.306695	0.306749	0.306989	0.306903	0.306133	0.305725
3	0.319373	0.319635	0.31945	0.318922	0.318918	0.319567	0.319668	0.318947	0.318258	0.318561	0.319363	0.319691	0.31964	0.319593	0.319643	0.319526	0.319604	0.320145	0.320341	0.320062	0.319669	0.319027	0.318486	0.318875	0.319927	0.320362	0.320114	0.320179	0.320602	0.320868	0.320809	0.320398	0.320154	0.320411	0.32089	0.321416	0.321604	0.32162	0.321894	0.322066	0.32208	0.322215	0.322161	0.321541	0.320966	0.321338	0.321896	0.321655	0.32173
3	0.340732	0.341095	0.340559	0.339669	0.339393	0.340033	0.340673	0.340315	0.339419	0.339429	0.340088	0.340323	0.340076	0.340128	0.340814	0.341243	0.341136	0.340975	0.340752	0.340255	0.339621	0.339321	0.339509	0.340062	0.340656	0.340865	0.340737	0.34065	0.340958	0.341326	0.341373	0.341037	0.340388	0.340255	0.3407	0.34101	0.3413	0.34184	0.342359	0.342509	0.342461	0.342495	0.342479	0.342322	0.342252	0.342822	0.343475	0.343158	0.34275
3	0.307975	0.308168	0.307774	0.307148	0.307472	0.3086	0.309101	0.308187	0.306659	0.306513	0.307629	0.30832	0.308586	0.308969	0.309074	0.308778	0.308659	0.309166	0.309736	0.30946	0.308579	0.307664	0.307217	0.30763	0.308462	0.308995	0.309225	0.309709	0.310267	0.31016	0.309479	0.308763	0.30839	0.30872	0.309468	0.30988	0.309809	0.310089	0.310936	0.31127	0.311108	0.311437	0.312003	0.311783	0.311067	0.311219	0.311693	0.310894	0.310077
3	0.317775	0.318083	0.318269	0.318205	0.318633	0.319472	0.31977	0.318937	0.317445	0.317139	0.317927	0.318305	0.318454	0.319045	0.319725	0.319788	0.319611	0.319479	0.31895	0.318334	0.318206	0.318341	0.318422	0.318939	0.319563	0.319273	0.318894	0.319438	0.320104	0.320006	0.319345	0.318539	0.318059	0.318193	0.318759	0.319422	0.31978	0.320309	0.32123	0.321453	0.320771	0.320304	0.320589	0.320751	0.32041	0.320817	0.321535	0.320965	0.320366
3	0.3257	0.325527	0.325278	0.325075	0.325621	0.326537	0.32677	0.325847	0.324603	0.324902	0.326251	0.326855	0.326457	0.326042	0.326343	0.326782	0.327049	0.327426	0.327445	0.32652	0.325448	0.325	0.324671	0.324769	0.325622	0.32624	0.326236	0.326228	0.326758	0.327333	0.327089	0.32615	0.325438	0.325698	0.326615	0.327355	0.327506	0.327537	0.328154	0.328777	0.328634	0.328278	0.328073	0.327824	0.327827	0.328145	0.327976	0.327069	0.326854
3	0.347086	0.347182	0.346893	0.346308	0.345825	0.345954	0.346254	0.345803	0.344829	0.344887	0.345937	0.346448	0.346368	0.346564	0.346629	0.346108	0.345848	0.346329	0.346537	0.345909	0.34518	0.344603	0.3442	0.344515	0.345562	0.346292	0.34631	0.346642	0.347477	0.347793	0.347678	0.347332	0.346455	0.34592	0.346174	0.346804	0.347133	0.347238	0.348011	0.348566	0.348274	0.348239	0.348467	0.348237	0.347911	0.347973	0.347824	0.347127	0.347051
3	0.369791	0.369671	0.369236	0.367835	0.366861	0.366794	0.366574	0.365991	0.365438	0.364898	0.364284	0.363627	0.362987	0.362429	0.362064	0.361846	0.361131	0.360058	0.359385	0.35907	0.359184	0.359577	0.359071	0.357741	0.357255	0.357795	0.357925	0.3574	0.357019	0.356457	0.355602	0.355234	0.355147	0.354738	0.354324	0.353845	0.352976	0.352017	0.351255	0.351101	0.351256	0.350983	0.350585	0.350689	0.350993	0.350856	0.350306	0.349634	0.349057
3	0.373936	0.373851	0.373469	0.373126	0.37275	0.371802	0.371083	0.370968	0.370394	0.369481	0.369085	0.36895	0.368289	0.367255	0.36681	0.367114	0.36687	0.365465	0.363679	0.362566	0.362743	0.363208	0.362999	0.362511	0.361828	0.360884	0.36031	0.360553	0.361043	0.360691	0.359849	0.359363	0.358808	0.358235	0.358026	0.357367	0.356143	0.355496	0.355493	0.355789	0.355715	0.354673	0.354009	0.354476	0.354809	0.354312	0.353597	0.353288	0.353375
3	0.380945	0.379971	0.379186	0.378773	0.378953	0.379052	0.378625	0.378236	0.3776	0.376589	0.375825	0.375429	0.37512	0.374511	0.373715	0.372943	0.372061	0.371681	0.371545	0.370724	0.369999	0.369831	0.369624	0.369415	0.369127	0.368724	0.36867	0.368705	0.368498	0.368188	0.36789	0.367731	0.367497	0.366824	0.366223	0.365895	0.365497	0.365323	0.364872	0.363944	0.363302	0.362996	0.363026	0.363256	0.363229	0.363129	0.363081	0.362824	0.362647
3	0.362277	0.36091	0.360839	0.361048	0.360618	0.359681	0.358879	0.35847	0.358019	0.35772	0.357791	0.357631	0.357062	0.356818	0.356871	0.356366	0.355326	0.35429	0.352974	0.351489	0.351092	0.351603	0.351701	0.351441	0.351219	0.350638	0.350119	0.350335	0.350422	0.349478	0.348195	0.347762	0.348094	0.348043	0.347303	0.346616	0.34631	0.345988	0.345503	0.345029	0.344483	0.343731	0.343172	0.343578	0.344576	0.344995	0.344251	0.342922	0.342412
3	0.379877	0.378998	0.378779	0.37827	0.377612	0.37713	0.376408	0.375857	0.375647	0.37566	0.376107	0.376251	0.375367	0.374261	0.373714	0.373475	0.373066	0.37243	0.371538	0.370732	0.370854	0.371222	0.370689	0.369852	0.369423	0.369283	0.36937	0.369343	0.368788	0.368204	0.368047	0.367879	0.367571	0.367228	0.366813	0.366391	0.36589	0.365484	0.365451	0.365548	0.365219	0.364451	0.363944	0.363992	0.364207	0.364602	0.365012	0.364795	0.364214
3	0.397	0.395639	0.394433	0.394054	0.39424	0.394088	0.393334	0.392707	0.392536	0.392476	0.392144	0.391686	0.391277	0.390768	0.390035	0.389192	0.388325	0.387507	0.386532	0.385531	0.385475	0.385986	0.385954	0.385571	0.385394	0.385181	0.384613	0.384334	0.384362	0.383661	0.382827	0.382918	0.382992	0.382595	0.382541	0.382393	0.381745	0.381369	0.38132	0.381021	0.380173	0.379247	0.379126	0.379697	0.379993	0.379689	0.379142	0.378688	0.378531
3	0.355787	0.355112	0.354097	0.353433	0.353159	0.352943	0.352679	0.352661	0.352547	0.351824	0.351069	0.350649	0.350245	0.349687	0.349222	0.349213	0.348914	0.348097	0.347129	0.345933	0.34566	0.346555	0.34678	0.346063	0.34547	0.34499	0.344683	0.344733	0.344605	0.34401	0.343385	0.343352	0.343643	0.343306	0.342525	0.342068	0.341834	0.341324	0.340645	0.340294	0.340242	0.340345	0.340531	0.340792	0.34106	0.340896	0.340233	0.339559	0.339276
3	0.375258	0.373724	0.373129	0.373129	0.372984	0.372561	0.372192	0.372108	0.371612	0.370784	0.37039	0.369933	0.368996	0.3684	0.368183	0.367516	0.366736	0.366553	0.36642	0.366046	0.365906	0.365806	0.365438	0.365086	0.364897	0.364537	0.364019	0.363609	0.363419	0.363194	0.362826	0.362685	0.362326	0.361507	0.360994	0.360461	0.359558	0.359068	0.358979	0.358984	0.358738	0.358054	0.35796	0.358639	0.358831	0.358388	0.358088	0.357781	0.357266
3	0.37586	0.375231	0.374374	0.373495	0.372699	0.372027	0.37124	0.370715	0.370824	0.37124	0.371592	0.371624	0.370952	0.369395	0.367949	0.367401	0.366932	0.366524	0.366386	0.365909	0.365328	0.36488	0.364589	0.364667	0.36448	0.363611	0.363131	0.363172	0.363042	0.362781	0.362237	0.361578	0.361203	0.36071	0.359685	0.358689	0.358518	0.358784	0.358659	0.358456	0.358236	0.357641	0.357356	0.357746	0.358149	0.357837	0.356892	0.356151	0.356043
3	0.390413	0.389356	0.388501	0.387942	0.387794	0.387564	0.386704	0.385951	0.385373	0.384571	0.383755	0.382793	0.382211	0.38261	0.382955	0.382522	0.381551	0.380397	0.37959	0.379037	0.37877	0.378713	0.378391	0.378161	0.378043	0.377458	0.376565	0.376045	0.37589	0.375357	0.37439	0.373711	0.373606	0.373751	0.374017	0.373967	0.373047	0.371788	0.370924	0.37048	0.369929	0.369047	0.368465	0.3685	0.368849	0.369473	0.369877	0.369258	0.368283
3	0.388076	0.387136	0.386284	0.385993	0.386444	0.386767	0.386346	0.385152	0.383554	0.382461	0.381997	0.381767	0.381757	0.381485	0.380411	0.379371	0.378883	0.378381	0.377614	0.376909	0.376529	0.376204	0.375764	0.375136	0.374608	0.374599	0.374521	0.373958	0.373495	0.373052	0.372701	0.37303	0.373155	0.372363	0.371156	0.370096	0.369418	0.369216	0.369464	0.369649	0.369103	0.368181	0.368109	0.368675	0.368675	0.367952	0.36725	0.36708	0.367164
3	0.360139	0.359358	0.3586	0.357887	0.357651	0.358024	0.35804	0.357456	0.357	0.356612	0.355955	0.355349	0.354714	0.353982	0.353619	0.353629	0.353433	0.352809	0.351955	0.351374	0.351467	0.351551	0.351149	0.350611	0.350084	0.349778	0.349844	0.349945	0.349911	0.349421	0.348276	0.347413	0.34699	0.346386	0.346063	0.346146	0.346025	0.345629	0.34563	0.345899	0.345039	0.3436	0.343488	0.344319	0.344708	0.344598	0.344196	0.343578	0.343167
3	0.383286	0.382521	0.381611	0.380862	0.380599	0.380785	0.380413	0.379223	0.378323	0.377915	0.377347	0.376969	0.376932	0.376466	0.375808	0.375687	0.375258	0.374122	0.373169	0.37271	0.372825	0.372805	0.371983	0.371334	0.37121	0.370876	0.370394	0.370011	0.369807	0.369731	0.369482	0.369209	0.368998	0.368546	0.367852	0.367242	0.367115	0.36743	0.36745	0.367074	0.366402	0.365166	0.364163	0.364223	0.364962	0.365548	0.365375	0.364623	0.364083
3	0.365938	0.364409	0.36378	0.363676	0.363583	0.363434	0.363014	0.362588	0.362263	0.361719	0.361034	0.360333	0.359876	0.359555	0.358945	0.358229	0.35747	0.356826	0.355962	0.354893	0.354922	0.355624	0.355569	0.355044	0.354699	0.354487	0.354225	0.353776	0.353407	0.353042	0.352574	0.352343	0.35206	0.351529	0.351309	0.351328	0.351097	0.350808	0.350303	0.349263	0.347989	0.347093	0.347315	0.348275	0.34869	0.348621	0.348499	0.348048	0.347465
3	0.355821	0.35506	0.354077	0.353046	0.35267	0.35319	0.353343	0.352701	0.35181	0.351154	0.350874	0.350668	0.350233	0.349691	0.349451	0.349655	0.349201	0.347864	0.346891	0.346585	0.346813	0.34703	0.34649	0.345699	0.345463	0.345594	0.345458	0.344889	0.344376	0.344082	0.344079	0.344366	0.34399	0.342814	0.341987	0.341659	0.341305	0.341149	0.341329	0.341466	0.340832	0.339521	0.33908	0.33991	0.340702	0.340669	0.339964	0.338992	0.338416
3	0.348806	0.347774	0.34683	0.346135	0.346079	0.346225	0.345963	0.345774	0.345659	0.345081	0.344308	0.34383	0.34352	0.342718	0.341624	0.341167	0.34101	0.340432	0.339388	0.33874	0.339252	0.33986	0.339519	0.338876	0.338591	0.338107	0.337156	0.336461	0.336422	0.336319	0.335905	0.335757	0.335556	0.33516	0.334811	0.334141	0.333585	0.333732	0.333754	0.333332	0.332824	0.332331	0.332433	0.332941	0.332825	0.332283	0.332088	0.33201	0.33181
3	0.361018	0.359766	0.359495	0.359346	0.358593	0.357832	0.357528	0.357533	0.357259	0.356617	0.35632	0.356202	0.355592	0.354835	0.354276	0.353791	0.353219	0.352746	0.352302	0.351803	0.351725	0.351674	0.351153	0.350746	0.35067	0.350509	0.350471	0.350769	0.350748	0.349994	0.349097	0.348661	0.34833	0.347671	0.34725	0.347078	0.346484	0.345977	0.346142	0.346411	0.346175	0.345576	0.345004	0.344938	0.345269	0.345291	0.344923	0.344425	0.344161
3	0.363143	0.362456	0.361439	0.360793	0.360411	0.360374	0.360646	0.360257	0.359227	0.358218	0.357457	0.356993	0.356806	0.356831	0.356461	0.355316	0.354279	0.35409	0.353898	0.353124	0.352553	0.352249	0.351737	0.351339	0.351204	0.351101	0.351073	0.350953	0.350416	0.349411	0.348778	0.349295	0.349614	0.348657	0.347955	0.347886	0.347138	0.346141	0.345876	0.345928	0.345397	0.344601	0.344581	0.345079	0.345079	0.344511	0.343842	0.343427	0.34343
3	0.361074	0.360412	0.359898	0.359806	0.360129	0.360277	0.359669	0.358741	0.358168	0.357918	0.357668	0.357155	0.35636	0.355639	0.355212	0.354918	0.354508	0.353964	0.353112	0.352106	0.351744	0.351731	0.35132	0.351198	0.351568	0.351225	0.350178	0.34949	0.349406	0.349227	0.348701	0.34839	0.348253	0.348059	0.347862	0.347514	0.347031	0.346433	0.346089	0.346213	0.345801	0.344854	0.344647	0.345174	0.345488	0.345449	0.345142	0.344698	0.344645
3	0.375153	0.374101	0.373491	0.373269	0.373246	0.373278	0.373142	0.372743	0.372113	0.371241	0.370215	0.369426	0.369055	0.36855	0.367611	0.366971	0.366704	0.36627	0.365712	0.365239	0.365322	0.365471	0.364861	0.364449	0.364601	0.364287	0.3635	0.363126	0.363102	0.362478	0.361825	0.361889	0.361628	0.361169	0.361272	0.360959	0.359925	0.35915	0.359184	0.359653	0.359311	0.357922	0.356972	0.357481	0.358545	0.358743	0.357994	0.357301	0.357209
3	0.35215	0.351312	0.350731	0.350314	0.349854	0.349163	0.348324	0.347805	0.348031	0.348568	0.348715	0.348067	0.34676	0.34581	0.34578	0.346067	0.345814	0.344847	0.34335	0.342308	0.342693	0.343452	0.343587	0.343306	0.342694	0.341992	0.341735	0.342018	0.342075	0.341326	0.340615	0.340747	0.340983	0.340679	0.34058	0.34083	0.340438	0.339441	0.338825	0.338748	0.338443	0.337647	0.337192	0.337632	0.338345	0.338707	0.338366	0.337417	0.336901
3	0.388508	0.388046	0.387054	0.386377	0.386263	0.385902	0.38518	0.384677	0.384376	0.383945	0.383308	0.382769	0.382555	0.382247	0.381871	0.381585	0.380863	0.380009	0.379287	0.378669	0.3786	0.378423	0.377749	0.377444	0.377525	0.377147	0.376228	0.375638	0.375645	0.375236	0.37446	0.374311	0.37436	0.374125	0.373868	0.37348	0.373057	0.372984	0.372912	0.372477	0.371937	0.37141	0.371228	0.3718	0.372537	0.372489	0.371528	0.370526	0.370254
3	0.382584	0.381516	0.380752	0.380217	0.379953	0.379562	0.379105	0.379016	0.378555	0.377577	0.376602	0.375905	0.375783	0.375687	0.374736	0.373521	0.373203	0.373326	0.372576	0.371419	0.371346	0.371526	0.37059	0.369742	0.369966	0.370065	0.369207	0.368228	0.368085	0.368056	0.367331	0.36686	0.366861	0.366489	0.365876	0.365299	0.364791	0.364666	0.36476	0.364532	0.36378	0.362855	0.362637	0.363276	0.363897	0.364008	0.363397	0.36223	0.361296
3	0.378431	0.378024	0.377741	0.377099	0.37656	0.376272	0.375898	0.375463	0.375331	0.375123	0.374212	0.373328	0.372884	0.372287	0.371672	0.371422	0.370881	0.370137	0.369216	0.367949	0.367723	0.36854	0.368477	0.367146	0.366199	0.366183	0.366156	0.365842	0.365667	0.365006	0.363651	0.363228	0.363534	0.363197	0.362808	0.362677	0.362208	0.361775	0.361305	0.360651	0.360386	0.359983	0.359473	0.359787	0.360082	0.359696	0.359607	0.359807	0.359576
3	0.333818	0.333178	0.333008	0.332911	0.332444	0.331576	0.330753	0.330586	0.330558	0.330034	0.329742	0.329817	0.329259	0.328121	0.327278	0.326804	0.326076	0.325391	0.324959	0.324626	0.324754	0.325132	0.325251	0.325061	0.324847	0.324592	0.324241	0.323919	0.323399	0.322424	0.321658	0.321577	0.321385	0.32103	0.321189	0.321371	0.320802	0.319755	0.319043	0.319253	0.319448	0.318666	0.318452	0.319539	0.320087	0.319411	0.318435	0.317835	0.317858
3	0.37601	0.374342	0.373248	0.373036	0.373199	0.373338	0.373108	0.372483	0.371738	0.371022	0.370748	0.370839	0.370602	0.369856	0.368939	0.368257	0.367615	0.36683	0.365915	0.365315	0.365593	0.365971	0.365857	0.365587	0.365104	0.3643	0.363686	0.36366	0.363821	0.363474	0.362911	0.362643	0.362278	0.361495	0.360739	0.360404	0.360198	0.360225	0.360682	0.360969	0.360462	0.35942	0.358877	0.359284	0.359731	0.359545	0.358905	0.358193	0.358061
3	0.364449	0.363803	0.363402	0.362678	0.361761	0.361257	0.360884	0.360388	0.360053	0.359723	0.359304	0.358946	0.358424	0.357798	0.35724	0.356598	0.355734	0.354848	0.354199	0.353971	0.354321	0.354526	0.353818	0.352853	0.352364	0.352003	0.351611	0.351464	0.351363	0.350963	0.350552	0.35024	0.34973	0.349165	0.348696	0.348103	0.347478	0.347369	0.347574	0.347578	0.347203	0.346408	0.346162	0.346833	0.347235	0.34696	0.346205	0.345324	0.345009
3	0.345256	0.344714	0.344108	0.343462	0.342821	0.342146	0.34145	0.341165	0.341043	0.340687	0.340386	0.340032	0.339534	0.339305	0.339356	0.338906	0.337587	0.336493	0.335887	0.335107	0.334865	0.335407	0.335589	0.335322	0.335323	0.335283	0.3349	0.334416	0.33398	0.333613	0.333271	0.333103	0.333148	0.333052	0.332683	0.332051	0.33142	0.331186	0.330989	0.33086	0.330951	0.330579	0.330048	0.330081	0.330254	0.330521	0.330567	0.329784	0.329256
3	0.386156	0.385056	0.384196	0.383696	0.383376	0.383057	0.382669	0.382371	0.3822	0.382043	0.381883	0.381336	0.380154	0.378774	0.378179	0.378552	0.378615	0.378063	0.377144	0.376016	0.375486	0.375545	0.375416	0.374878	0.37454	0.374225	0.373145	0.372399	0.372943	0.373245	0.372585	0.371934	0.371491	0.37113	0.370675	0.369806	0.368939	0.368517	0.36838	0.368333	0.367952	0.367065	0.366579	0.3671	0.36763	0.36707	0.366029	0.365651	0.365753
3	0.389875	0.389078	0.388473	0.387618	0.386708	0.386174	0.385247	0.38439	0.38396	0.383539	0.383756	0.384253	0.383705	0.382405	0.381585	0.381483	0.380816	0.379619	0.378955	0.378725	0.378898	0.378905	0.378115	0.377358	0.377	0.37645	0.375933	0.375772	0.375385	0.374154	0.37274	0.371927	0.37152	0.371458	0.371572	0.37136	0.37083	0.370439	0.370174	0.369877	0.369348	0.368476	0.367988	0.368153	0.368041	0.367453	0.36722	0.367388	0.367402
3	0.383169	0.382212	0.380923	0.380131	0.379882	0.379485	0.37888	0.378031	0.376641	0.375785	0.376246	0.376611	0.376085	0.375451	0.374928	0.374286	0.373549	0.372637	0.371397	0.370789	0.371412	0.371672	0.370825	0.36987	0.369029	0.36818	0.367823	0.367924	0.367789	0.366937	0.366041	0.366268	0.366862	0.366319	0.365381	0.365093	0.364812	0.364328	0.363965	0.363538	0.362679	0.361513	0.360978	0.361455	0.362083	0.361971	0.361253	0.360678	0.360505
3	0.357153	0.355928	0.355012	0.354734	0.355012	0.354931	0.354271	0.353952	0.354012	0.353783	0.353222	0.35246	0.351796	0.351302	0.350805	0.350377	0.349825	0.34909	0.348146	0.347318	0.347224	0.34742	0.347208	0.346918	0.34698	0.34684	0.346003	0.345286	0.345553	0.345711	0.345007	0.344601	0.344545	0.343942	0.343186	0.342837	0.342556	0.342028	0.341557	0.341502	0.341455	0.340883	0.340447	0.341043	0.341758	0.341655	0.34137	0.341367	0.341418
3	0.393659	0.392615	0.391466	0.390781	0.390617	0.390207	0.389089	0.388246	0.387977	0.387436	0.386896	0.387052	0.387003	0.38606	0.384977	0.384581	0.384603	0.383913	0.382684	0.381976	0.381845	0.381448	0.380638	0.380384	0.38053	0.380223	0.379846	0.380196	0.380805	0.380163	0.378532	0.377701	0.377616	0.377074	0.376517	0.376584	0.376673	0.376564	0.376424	0.376291	0.376096	0.375661	0.375292	0.37524	0.375028	0.374507	0.373958	0.373547	0.373548
3	0.393976	0.392958	0.392057	0.391642	0.390993	0.390064	0.389574	0.389582	0.389952	0.390168	0.389644	0.388566	0.38751	0.387126	0.387309	0.387132	0.386269	0.385385	0.3847	0.38386	0.383237	0.383267	0.383497	0.383441	0.382912	0.381963	0.381431	0.381409	0.380976	0.380071	0.379334	0.378818	0.378152	0.377689	0.377729	0.377774	0.377604	0.377128	0.376392	0.37597	0.375561	0.374753	0.374508	0.375036	0.375013	0.374296	0.3737	0.37323	0.373163
3	0.397783	0.396609	0.395764	0.395216	0.394469	0.394145	0.394677	0.394978	0.394374	0.393695	0.393436	0.392897	0.391616	0.390466	0.389692	0.388968	0.388393	0.387726	0.387236	0.387383	0.38774	0.387547	0.386639	0.385668	0.385052	0.384506	0.384188	0.38429	0.384299	0.383765	0.382972	0.382593	0.382337	0.381622	0.380922	0.380748	0.380686	0.380209	0.379687	0.379586	0.379249	0.378551	0.378637	0.379171	0.378941	0.37846	0.37817	0.377611	0.377015
3	0.373364	0.372469	0.371945	0.371501	0.370713	0.369982	0.369572	0.369201	0.368839	0.368842	0.369197	0.369086	0.368128	0.367365	0.367265	0.366993	0.366325	0.365914	0.365517	0.364783	0.364531	0.364762	0.364684	0.36409	0.363033	0.362123	0.361998	0.362022	0.361582	0.360982	0.360443	0.359992	0.359561	0.359215	0.359105	0.358654	0.357761	0.357231	0.35715	0.357261	0.357086	0.356219	0.355358	0.355463	0.356361	0.356917	0.356602	0.355726	0.354985
3	0.408482	0.407549	0.406678	0.405875	0.405512	0.405563	0.405108	0.404318	0.403771	0.403236	0.40285	0.402606	0.401866	0.400799	0.400437	0.400444	0.399579	0.398421	0.397643	0.397091	0.397046	0.397168	0.39685	0.396338	0.395804	0.394874	0.393966	0.393889	0.394192	0.393961	0.393448	0.393072	0.392374	0.391399	0.390974	0.391225	0.391343	0.391133	0.391014	0.390373	0.388819	0.387608	0.387621	0.388321	0.388728	0.388475	0.387833	0.387238	0.387264
3	0.390125	0.389257	0.388622	0.388561	0.388566	0.387993	0.387029	0.386312	0.386047	0.385709	0.385223	0.38473	0.384282	0.384155	0.383958	0.383725	0.383581	0.382768	0.381324	0.380142	0.380012	0.380422	0.380151	0.379558	0.379457	0.379372	0.378708	0.37788	0.377496	0.377562	0.377691	0.377513	0.376961	0.376268	0.375632	0.374797	0.374193	0.374423	0.374841	0.374938	0.374332	0.373341	0.373273	0.373947	0.37435	0.374179	0.373408	0.372773	0.372823
3	0.379051	0.377683	0.37734	0.377563	0.377692	0.377371	0.37653	0.375872	0.375215	0.374211	0.373711	0.37386	0.373591	0.37281	0.372107	0.371113	0.370014	0.36967	0.369338	0.368588	0.368537	0.368972	0.368846	0.368145	0.367366	0.366642	0.366146	0.366294	0.366555	0.366131	0.365388	0.364769	0.364281	0.363922	0.363566	0.363156	0.362622	0.36215	0.361918	0.361753	0.361364	0.360726	0.360579	0.360921	0.360667	0.359908	0.359307	0.358857	0.358743
3	0.413567	0.4124	0.411175	0.410485	0.410505	0.410108	0.408761	0.40758	0.407296	0.40736	0.40713	0.406605	0.406047	0.405323	0.404267	0.403354	0.402872	0.402751	0.402472	0.402012	0.401992	0.401984	0.401561	0.400865	0.400142	0.399585	0.399543	0.400254	0.400633	0.399748	0.398277	0.397267	0.396924	0.396717	0.396445	0.396146	0.395667	0.395368	0.395593	0.395807	0.395257	0.394183	0.393736	0.394074	0.394263	0.394237	0.394094	0.393389	0.392665
3	0.391456	0.391309	0.391171	0.390798	0.390913	0.392091	0.392761	0.391511	0.389916	0.39037	0.391862	0.392222	0.391831	0.391722	0.391768	0.391651	0.391562	0.391577	0.391717	0.39194	0.391832	0.391037	0.390126	0.390057	0.390683	0.391151	0.391257	0.391703	0.392658	0.393127	0.392517	0.391102	0.390116	0.390599	0.391538	0.39203	0.392442	0.393073	0.39358	0.393434	0.392895	0.392727	0.392831	0.392731	0.392835	0.393347	0.393631	0.393117	0.39254
3	0.415719	0.415101	0.414279	0.413493	0.413718	0.415195	0.416072	0.415352	0.414247	0.41429	0.414916	0.415053	0.415209	0.415753	0.416079	0.41587	0.415768	0.416188	0.416562	0.416396	0.416163	0.416005	0.415709	0.415617	0.415576	0.415223	0.415159	0.416001	0.416673	0.416062	0.415215	0.414944	0.414839	0.415062	0.415533	0.41583	0.416078	0.416345	0.416518	0.416934	0.417665	0.41782	0.417414	0.417338	0.417369	0.417297	0.417127	0.416542	0.416646
3	0.434754	0.434581	0.434444	0.434497	0.434894	0.435348	0.435159	0.434177	0.432902	0.432808	0.433731	0.434379	0.434925	0.435326	0.435335	0.435312	0.435623	0.435892	0.435562	0.43513	0.434856	0.434297	0.433786	0.433877	0.434439	0.434921	0.434933	0.434864	0.435116	0.435483	0.435835	0.435638	0.434588	0.433896	0.434137	0.434678	0.435228	0.435871	0.436697	0.4373	0.437254	0.437079	0.437141	0.436738	0.436356	0.437192	0.437825	0.436996	0.436509
3	0.403504	0.403247	0.403173	0.403327	0.403484	0.403861	0.403957	0.403267	0.402569	0.402808	0.403358	0.403342	0.403266	0.403811	0.404361	0.404171	0.404063	0.404229	0.403986	0.40343	0.403121	0.402787	0.401966	0.401872	0.40283	0.403198	0.40281	0.403119	0.403968	0.404004	0.403358	0.402771	0.402564	0.40299	0.403821	0.404441	0.404471	0.404411	0.404601	0.404587	0.404416	0.40489	0.405679	0.405516	0.405008	0.405127	0.405356	0.405159	0.404761
3	0.450622	0.450545	0.449984	0.449601	0.449646	0.450392	0.451422	0.451057	0.449369	0.448986	0.450302	0.45109	0.451097	0.451393	0.451706	0.451611	0.451363	0.450635	0.449561	0.449112	0.449252	0.449213	0.449352	0.450045	0.450379	0.449804	0.449195	0.449594	0.450443	0.45061	0.450292	0.44986	0.449379	0.449592	0.450511	0.45109	0.450953	0.450881	0.451266	0.451574	0.451827	0.452104	0.451928	0.451329	0.451187	0.451751	0.452058	0.451651	0.451609
3	0.389313	0.389522	0.389314	0.389177	0.389778	0.390571	0.390872	0.390391	0.389025	0.388557	0.389576	0.389934	0.389451	0.389716	0.390347	0.39003	0.389638	0.390183	0.390769	0.390749	0.390244	0.389365	0.388915	0.389596	0.390429	0.390262	0.389503	0.389497	0.390477	0.390862	0.390236	0.389591	0.38946	0.390007	0.39039	0.390354	0.390767	0.391595	0.391985	0.391689	0.391504	0.391796	0.391807	0.390838	0.389813	0.38999	0.390363	0.389945	0.390197
3	0.363905	0.364464	0.364686	0.364261	0.364064	0.364816	0.365375	0.364702	0.363631	0.363838	0.36484	0.365063	0.365069	0.365506	0.365655	0.365309	0.365269	0.365694	0.365997	0.365858	0.365422	0.364812	0.364267	0.364519	0.365498	0.366025	0.365721	0.36556	0.36601	0.366329	0.365886	0.364839	0.364236	0.364648	0.365275	0.365783	0.366296	0.366852	0.367298	0.367248	0.367054	0.36717	0.36745	0.367632	0.36777	0.368175	0.368493	0.368089	0.367716
3	0.384732	0.384123	0.384032	0.384267	0.384902	0.38585	0.385997	0.38472	0.383256	0.383636	0.384864	0.384932	0.384596	0.384895	0.385559	0.385901	0.385929	0.385911	0.385659	0.385164	0.384627	0.384038	0.383732	0.384102	0.384678	0.384757	0.384492	0.384754	0.38554	0.386008	0.385852	0.385085	0.384309	0.384418	0.38517	0.386027	0.386586	0.386866	0.387265	0.387256	0.386813	0.386886	0.387447	0.387531	0.386896	0.386625	0.386986	0.386834	0.386614
3	0.367113	0.367235	0.36717	0.366929	0.367246	0.368392	0.369376	0.368606	0.366165	0.365564	0.367562	0.368868	0.36839	0.367669	0.367586	0.367788	0.368151	0.368242	0.367755	0.367459	0.367643	0.367451	0.366654	0.366379	0.367013	0.367407	0.367051	0.366929	0.367244	0.367328	0.367449	0.367166	0.366371	0.366706	0.367777	0.368139	0.368117	0.368328	0.368622	0.368657	0.368346	0.368055	0.368222	0.368449	0.368401	0.368466	0.368553	0.368178	0.368164
3	0.422231	0.422346	0.421849	0.421243	0.421248	0.422043	0.422062	0.420623	0.419407	0.420158	0.421697	0.421843	0.421038	0.420817	0.421372	0.421586	0.421307	0.421254	0.421299	0.421202	0.42116	0.42117	0.42123	0.421577	0.421948	0.421778	0.421449	0.421837	0.422544	0.422613	0.422094	0.421133	0.420177	0.420268	0.42117	0.421799	0.421854	0.421896	0.422261	0.422883	0.42335	0.423303	0.423005	0.422249	0.421655	0.422495	0.423494	0.42294	0.422063
3	0.449364	0.448822	0.448582	0.44842	0.448685	0.449753	0.450576	0.449663	0.44766	0.44689	0.44744	0.447887	0.447963	0.448221	0.448723	0.448821	0.448934	0.449311	0.449294	0.448723	0.448124	0.448049	0.448103	0.447807	0.44766	0.447627	0.447406	0.447775	0.448788	0.449262	0.449083	0.448788	0.448311	0.448089	0.448575	0.44929	0.449574	0.449761	0.450096	0.449953	0.449735	0.44978	0.449533	0.449186	0.44926	0.450106	0.450887	0.450313	0.449631
3	0.400365	0.400106	0.399695	0.39956	0.400074	0.401208	0.401921	0.401196	0.399665	0.399359	0.400527	0.401246	0.401053	0.401226	0.401926	0.402067	0.401552	0.40134	0.401366	0.400993	0.400474	0.399921	0.399595	0.400077	0.400957	0.401313	0.401157	0.401402	0.402069	0.402085	0.401523	0.401046	0.400807	0.401114	0.401277	0.400717	0.400397	0.401111	0.402126	0.402523	0.402518	0.402204	0.40156	0.401158	0.40147	0.402358	0.402976	0.40252	0.401905
3	0.398045	0.397876	0.398143	0.397844	0.397641	0.398531	0.399431	0.398996	0.397886	0.397825	0.39833	0.398172	0.397914	0.398206	0.398672	0.39884	0.399185	0.400052	0.400775	0.400648	0.399789	0.398586	0.397594	0.397641	0.398434	0.398847	0.398917	0.399362	0.399887	0.399946	0.399679	0.398762	0.397405	0.397179	0.398275	0.399457	0.399859	0.399748	0.399619	0.399498	0.399769	0.40031	0.400466	0.400263	0.400377	0.400835	0.400709	0.399902	0.399718
3	0.421389	0.420983	0.421112	0.421665	0.422054	0.422219	0.421808	0.42055	0.419236	0.419493	0.421003	0.421736	0.421477	0.421509	0.421674	0.421184	0.420814	0.42113	0.421694	0.421963	0.421662	0.420916	0.420401	0.420802	0.421527	0.421792	0.42162	0.4215	0.42178	0.421999	0.421551	0.420482	0.419883	0.420495	0.421447	0.42175	0.421739	0.422434	0.423364	0.423549	0.423509	0.423693	0.423474	0.422677	0.422201	0.422456	0.422664	0.422256	0.422129
3	0.393643	0.393031	0.392685	0.392871	0.393315	0.39403	0.394547	0.394068	0.393091	0.393113	0.393815	0.393971	0.394095	0.394447	0.394033	0.392984	0.392793	0.393577	0.394244	0.394465	0.394216	0.393401	0.3928	0.393134	0.393694	0.393523	0.392622	0.392333	0.393235	0.39377	0.393389	0.39296	0.392733	0.392909	0.393415	0.393697	0.394111	0.394952	0.395273	0.394884	0.394583	0.394531	0.394794	0.395131	0.394754	0.394416	0.39484	0.394895	0.394685
3	0.407569	0.407302	0.407478	0.407455	0.407519	0.408372	0.409433	0.408772	0.406695	0.406533	0.408368	0.409181	0.4087	0.40846	0.408633	0.408702	0.408948	0.40942	0.409451	0.409137	0.408775	0.408293	0.408137	0.408326	0.40852	0.40848	0.408027	0.407917	0.408512	0.409133	0.409243	0.408448	0.407487	0.407689	0.40846	0.408779	0.408998	0.409681	0.410305	0.410178	0.410047	0.41044	0.410538	0.4101	0.409963	0.410278	0.4101	0.4091	0.408539
3	0.455382	0.455417	0.455569	0.455568	0.455595	0.456218	0.456621	0.455546	0.454342	0.454979	0.455942	0.455954	0.456083	0.456594	0.456684	0.456095	0.455861	0.456173	0.456232	0.456281	0.456699	0.456425	0.455405	0.45524	0.455794	0.455675	0.455143	0.455224	0.455677	0.455935	0.455819	0.455235	0.454396	0.454223	0.455222	0.45612	0.455965	0.45587	0.45646	0.457138	0.457753	0.458127	0.45793	0.457323	0.456952	0.45708	0.457177	0.456827	0.456714
3	0.404818	0.404576	0.403931	0.40324	0.40319	0.403927	0.404476	0.404099	0.403348	0.40351	0.404085	0.404035	0.403559	0.403457	0.403866	0.404031	0.404137	0.404342	0.404242	0.404198	0.40412	0.403205	0.402513	0.403289	0.404168	0.403868	0.40344	0.404027	0.40505	0.405609	0.405481	0.404716	0.404066	0.404488	0.405139	0.405273	0.40527	0.405432	0.40614	0.406522	0.405954	0.405578	0.405704	0.405524	0.405063	0.405164	0.405622	0.405444	0.405261
3	0.375655	0.375626	0.375525	0.375586	0.376533	0.377714	0.377831	0.376771	0.375597	0.375649	0.376483	0.376892	0.377131	0.377771	0.378317	0.378193	0.378111	0.378308	0.378094	0.37737	0.376651	0.376415	0.376603	0.377071	0.377705	0.377785	0.377254	0.377432	0.378271	0.378597	0.378531	0.37815	0.377421	0.377414	0.378154	0.378381	0.378185	0.378624	0.379352	0.379557	0.379556	0.379511	0.379442	0.37967	0.37986	0.379928	0.379972	0.379386	0.378634
3	0.386194	0.386691	0.386957	0.386705	0.386967	0.388134	0.388725	0.387902	0.386527	0.386051	0.386618	0.387021	0.386761	0.38665	0.386932	0.387065	0.387269	0.387429	0.38697	0.386034	0.385629	0.38581	0.385907	0.386597	0.387608	0.38756	0.386913	0.387013	0.387782	0.38818	0.387723	0.386739	0.386276	0.386831	0.387432	0.387381	0.387123	0.387669	0.388848	0.389405	0.389228	0.388866	0.388602	0.388416	0.388349	0.388815	0.389481	0.389339	0.388964
3	0.383561	0.382805	0.382443	0.382454	0.382694	0.383368	0.383863	0.383279	0.382064	0.382199	0.38321	0.383329	0.383257	0.383664	0.383773	0.383389	0.383342	0.383761	0.383828	0.383293	0.382975	0.382995	0.383088	0.38351	0.38384	0.383491	0.38295	0.383406	0.384495	0.384964	0.384657	0.383903	0.383504	0.38356	0.383619	0.384025	0.384522	0.385052	0.386005	0.38679	0.386927	0.386537	0.385939	0.385377	0.384985	0.385259	0.385826	0.385646	0.385367
3	0.387667	0.388206	0.388707	0.388417	0.388306	0.388707	0.388388	0.386618	0.384767	0.385379	0.38752	0.388214	0.387538	0.386927	0.386843	0.38693	0.387147	0.387655	0.388226	0.388456	0.387937	0.386894	0.386329	0.386851	0.387676	0.387614	0.387062	0.387348	0.388147	0.38853	0.388519	0.387657	0.386466	0.386784	0.388213	0.389102	0.388647	0.38772	0.387823	0.388321	0.388436	0.388818	0.389324	0.38897	0.388187	0.388173	0.388604	0.388429	0.387994
3	0.391839	0.39208	0.392186	0.392184	0.392514	0.393304	0.393465	0.392167	0.390575	0.390878	0.392362	0.39267	0.391836	0.391326	0.391659	0.392096	0.392424	0.392667	0.392506	0.391988	0.391408	0.390758	0.39044	0.391142	0.392024	0.392101	0.391753	0.391833	0.392365	0.39287	0.393092	0.392636	0.39203	0.391961	0.392235	0.392843	0.393347	0.393377	0.39339	0.393415	0.393254	0.393182	0.39343	0.393591	0.393476	0.393716	0.393902	0.393351	0.393097
3	0.433612	0.433489	0.433092	0.432529	0.432506	0.43334	0.434114	0.433666	0.432068	0.43175	0.433323	0.434344	0.434227	0.434203	0.434453	0.434603	0.434922	0.435401	0.435601	0.435308	0.434429	0.43312	0.432457	0.433196	0.434239	0.434328	0.433983	0.43441	0.435451	0.436084	0.435796	0.4346	0.433258	0.433036	0.43378	0.434323	0.434298	0.434371	0.4351	0.435879	0.436076	0.435733	0.435282	0.434997	0.434661	0.434506	0.434655	0.434695	0.43507
3	0.41543	0.4147	0.413946	0.414128	0.414803	0.415251	0.415393	0.414718	0.413356	0.413025	0.413824	0.414336	0.41468	0.414922	0.414618	0.414482	0.414788	0.414902	0.414678	0.414379	0.414152	0.413721	0.413503	0.41412	0.415073	0.415373	0.414783	0.414272	0.414338	0.414661	0.414874	0.414646	0.414388	0.414776	0.415446	0.415565	0.415201	0.415265	0.415749	0.415781	0.415383	0.415476	0.416271	0.416664	0.416426	0.416425	0.416555	0.416372	0.416638
3	0.370313	0.370243	0.369712	0.369469	0.369938	0.370609	0.370852	0.370328	0.369463	0.369796	0.370975	0.371176	0.370577	0.370602	0.371127	0.371201	0.371103	0.371306	0.371629	0.371457	0.37087	0.370435	0.370459	0.371215	0.371749	0.37107	0.370146	0.370285	0.371293	0.37205	0.371799	0.370694	0.369801	0.369736	0.370003	0.370476	0.371196	0.371938	0.37247	0.372472	0.372021	0.37167	0.371793	0.371737	0.371239	0.371573	0.372481	0.372189	0.37162
3	0.388204	0.388006	0.388096	0.387945	0.388057	0.38912	0.389682	0.38843	0.386959	0.387848	0.389708	0.389803	0.388908	0.388527	0.388491	0.388252	0.388327	0.389174	0.390066	0.38991	0.38883	0.388062	0.388211	0.388946	0.389449	0.388895	0.387757	0.387845	0.389291	0.390171	0.389919	0.388916	0.387805	0.387845	0.388504	0.388927	0.389304	0.389666	0.390167	0.390399	0.389974	0.38982	0.390289	0.390211	0.389789	0.390223	0.390776	0.39053	0.390348
3	0.400242	0.399964	0.400045	0.400298	0.400473	0.400738	0.400574	0.399377	0.397801	0.398117	0.400174	0.401047	0.400277	0.399609	0.399632	0.399891	0.400598	0.401555	0.40168	0.400737	0.399683	0.398948	0.39854	0.399044	0.399939	0.399994	0.399756	0.400244	0.400763	0.400628	0.400287	0.399815	0.399331	0.39961	0.400392	0.400548	0.400195	0.400501	0.40148	0.402247	0.40264	0.402935	0.402983	0.402415	0.401622	0.401514	0.401888	0.401762	0.401841
3	0.408911	0.409676	0.410052	0.409863	0.409871	0.41033	0.410695	0.4102	0.408802	0.408406	0.409005	0.409208	0.409249	0.409627	0.410118	0.409982	0.409607	0.409563	0.409674	0.409546	0.409188	0.409024	0.40902	0.409504	0.410472	0.410724	0.410086	0.410048	0.41059	0.410214	0.409235	0.408614	0.408539	0.40934	0.410105	0.409924	0.40969	0.410031	0.410747	0.411286	0.411425	0.411604	0.411766	0.411689	0.411718	0.411835	0.411482	0.410669	0.410535
3	0.421029	0.420862	0.420871	0.421118	0.421612	0.422163	0.422166	0.421473	0.420769	0.421374	0.422807	0.423225	0.422361	0.421466	0.421342	0.421485	0.42163	0.421805	0.42147	0.420825	0.420582	0.420512	0.420536	0.421171	0.421826	0.421511	0.420742	0.42072	0.421588	0.422079	0.421441	0.420371	0.419823	0.420247	0.421071	0.421674	0.422264	0.423079	0.42366	0.423537	0.422884	0.422511	0.422906	0.423088	0.422537	0.422201	0.422205	0.421912	0.422061
3	0.389126	0.38844	0.388278	0.388287	0.388331	0.388896	0.389076	0.387719	0.385842	0.385987	0.387796	0.389002	0.389431	0.389651	0.389808	0.389584	0.389115	0.389195	0.389695	0.389486	0.388365	0.387433	0.387286	0.387717	0.388091	0.387733	0.387276	0.38776	0.38846	0.38871	0.389026	0.388698	0.387487	0.387212	0.38822	0.38896	0.388962	0.389213	0.390033	0.390559	0.390366	0.389898	0.389516	0.38915	0.389212	0.390275	0.391153	0.390627	0.390187
3	0.401147	0.401279	0.401019	0.40086	0.40115	0.401547	0.401635	0.400946	0.400078	0.40076	0.40206	0.401817	0.40083	0.40098	0.401744	0.401942	0.402145	0.402247	0.401685	0.400944	0.400712	0.400896	0.401144	0.401381	0.401491	0.401612	0.401552	0.401402	0.401469	0.40166	0.401885	0.401461	0.40065	0.401006	0.402348	0.403259	0.403314	0.403475	0.404191	0.404201	0.403553	0.403538	0.403782	0.403582	0.403256	0.403218	0.403455	0.403514	0.403611
3	0.418689	0.418762	0.418026	0.417439	0.417695	0.418604	0.418924	0.417935	0.416939	0.417533	0.418456	0.418486	0.418317	0.418233	0.418135	0.41781	0.417803	0.418441	0.418935	0.418683	0.418093	0.417776	0.417773	0.418329	0.419108	0.419064	0.418618	0.419054	0.419932	0.419931	0.419065	0.418174	0.417781	0.418181	0.419181	0.420128	0.420599	0.42071	0.42054	0.419969	0.419626	0.419888	0.419803	0.419001	0.4187	0.419444	0.420183	0.420214	0.420398
3	0.393225	0.393103	0.393054	0.392872	0.393137	0.394066	0.394184	0.392651	0.391461	0.392396	0.393893	0.394248	0.394119	0.393946	0.39344	0.392948	0.392997	0.393464	0.393829	0.393654	0.392799	0.391634	0.391053	0.391553	0.392574	0.392871	0.392615	0.393378	0.394739	0.395098	0.394585	0.393874	0.393154	0.393157	0.39406	0.394932	0.394995	0.394334	0.393799	0.393928	0.394422	0.39467	0.394571	0.394274	0.394145	0.394771	0.395307	0.394557	0.393872
3	0.401293	0.400922	0.400372	0.399899	0.400008	0.400971	0.401363	0.400422	0.39932	0.399421	0.400419	0.401046	0.401166	0.401436	0.401807	0.401781	0.401679	0.402042	0.402295	0.401683	0.40101	0.400681	0.400325	0.400628	0.401662	0.401967	0.40133	0.401262	0.401752	0.401603	0.400847	0.399884	0.399144	0.399537	0.400674	0.401372	0.401393	0.401603	0.402563	0.403019	0.402322	0.401761	0.402051	0.402265	0.401931	0.401842	0.401902	0.401514	0.401691
3	0.39144	0.391303	0.39094	0.390519	0.390141	0.390563	0.391132	0.390076	0.388195	0.388309	0.389899	0.390696	0.391003	0.391392	0.3915	0.391213	0.391021	0.391086	0.390936	0.390661	0.390606	0.390325	0.389879	0.390114	0.390669	0.390539	0.390113	0.390647	0.391869	0.392317	0.391839	0.39096	0.390096	0.389961	0.390286	0.390761	0.391365	0.391695	0.391989	0.392202	0.392039	0.391917	0.392031	0.392134	0.392254	0.39244	0.392299	0.391733	0.391739
3	0.389699	0.389461	0.388788	0.388269	0.388745	0.390043	0.390569	0.389453	0.388102	0.388411	0.389489	0.3897	0.389644	0.390124	0.390313	0.389617	0.389215	0.389607	0.38989	0.390041	0.39009	0.389206	0.388296	0.388943	0.39015	0.390179	0.389233	0.388886	0.389773	0.39065	0.390744	0.390381	0.389869	0.389924	0.3907	0.391394	0.391517	0.391458	0.391542	0.391542	0.391481	0.391419	0.391171	0.390866	0.391028	0.391961	0.392876	0.392588	0.391973
3	0.465771	0.46608	0.4656	0.465405	0.466005	0.466751	0.466657	0.46529	0.463589	0.463528	0.464935	0.465551	0.465354	0.465553	0.465958	0.466153	0.466328	0.466439	0.466063	0.46545	0.465131	0.464404	0.46346	0.46378	0.464872	0.46517	0.464703	0.464762	0.465667	0.465895	0.464706	0.463434	0.46333	0.464414	0.465646	0.466099	0.465849	0.465514	0.465919	0.466982	0.46755	0.467261	0.466717	0.466379	0.466476	0.467109	0.467544	0.46701	0.466691
3	0.387538	0.387374	0.387187	0.387149	0.387321	0.388098	0.388688	0.387612	0.385547	0.385267	0.386424	0.386836	0.387135	0.387924	0.388573	0.388863	0.388831	0.388625	0.388326	0.3879	0.38724	0.386245	0.385733	0.386478	0.387557	0.387739	0.387241	0.387118	0.387428	0.387541	0.387379	0.386904	0.386538	0.386948	0.387572	0.387984	0.388314	0.388415	0.388654	0.389006	0.388919	0.388756	0.388891	0.389005	0.388829	0.38881	0.388947	0.388322	0.387865
3	0.375017	0.375207	0.374967	0.374433	0.373987	0.374277	0.37477	0.374172	0.37279	0.372771	0.373993	0.374503	0.374761	0.37561	0.375927	0.375201	0.374845	0.375103	0.37497	0.374487	0.374098	0.373764	0.373598	0.374115	0.374776	0.374504	0.373903	0.374224	0.374858	0.374813	0.374558	0.374253	0.373956	0.374383	0.375326	0.375752	0.375465	0.375295	0.375324	0.374998	0.374525	0.374408	0.374689	0.374714	0.37451	0.375026	0.375924	0.376008	0.375667
3	0.300154	0.300455	0.300573	0.300531	0.300921	0.301578	0.301397	0.300388	0.299489	0.299715	0.300616	0.300869	0.300602	0.300732	0.300975	0.300858	0.301249	0.301854	0.301646	0.30154	0.301935	0.301702	0.300989	0.300965	0.301386	0.301341	0.301276	0.302036	0.303187	0.303439	0.302664	0.301797	0.30132	0.301622	0.302555	0.303252	0.303396	0.303353	0.303446	0.3038	0.304293	0.304535	0.304311	0.303836	0.30362	0.303962	0.304239	0.303842	0.303937
3	0.295148	0.295373	0.295378	0.295158	0.295513	0.29613	0.295839	0.294535	0.293543	0.294418	0.295896	0.295943	0.295386	0.295908	0.296993	0.297223	0.297079	0.297285	0.297234	0.296725	0.296349	0.296059	0.295915	0.29655	0.29733	0.297046	0.29636	0.296461	0.296944	0.297081	0.296622	0.29577	0.295511	0.296375	0.297547	0.298296	0.298616	0.298792	0.298963	0.298951	0.299018	0.299271	0.299283	0.298824	0.298314	0.29869	0.299542	0.299677	0.299482
3	0.291009	0.290819	0.290625	0.291033	0.291756	0.292386	0.292366	0.291254	0.289483	0.289051	0.290294	0.291285	0.291605	0.292059	0.292259	0.291965	0.292317	0.293195	0.293238	0.292197	0.29105	0.290385	0.290135	0.290796	0.291875	0.2921	0.292009	0.292677	0.293578	0.293448	0.292735	0.292184	0.291424	0.291177	0.29199	0.292815	0.293242	0.293818	0.294268	0.294225	0.294018	0.293953	0.294241	0.29446	0.294208	0.29413	0.294267	0.293915	0.293736
3	0.287847	0.288164	0.28802	0.287568	0.287803	0.288846	0.289135	0.287727	0.28603	0.286432	0.28818	0.288655	0.288034	0.287937	0.288318	0.288555	0.288865	0.289369	0.289644	0.28941	0.289048	0.288551	0.287754	0.287523	0.288099	0.288599	0.2888	0.289141	0.289707	0.290086	0.289876	0.289009	0.288302	0.288659	0.289523	0.289893	0.289815	0.290129	0.290947	0.291515	0.291751	0.291964	0.291908	0.291419	0.291083	0.291478	0.291869	0.291452	0.291246
3	0.283631	0.283252	0.282633	0.282172	0.282693	0.284011	0.28445	0.283353	0.282009	0.282101	0.283248	0.283921	0.283985	0.283995	0.283909	0.283668	0.283712	0.284121	0.284309	0.284017	0.283466	0.28275	0.282339	0.283029	0.284084	0.284088	0.283582	0.284007	0.285161	0.285713	0.285521	0.284647	0.283496	0.283658	0.284902	0.285552	0.285492	0.285679	0.286173	0.286466	0.28635	0.286162	0.286217	0.285983	0.285526	0.285913	0.286616	0.2863	0.28613
3	0.286746	0.287258	0.287413	0.28694	0.28662	0.287036	0.287274	0.286519	0.285698	0.286529	0.287792	0.287549	0.286984	0.287212	0.287447	0.287361	0.287517	0.287798	0.287619	0.287187	0.287134	0.287033	0.286544	0.286878	0.288119	0.288768	0.288737	0.28896	0.289453	0.28948	0.288943	0.288416	0.288067	0.287794	0.287821	0.288524	0.289348	0.289622	0.289788	0.290067	0.290269	0.290554	0.290676	0.290289	0.28997	0.2903	0.29063	0.29034	0.290377
3	0.298722	0.298623	0.298845	0.299151	0.299596	0.300213	0.300534	0.299956	0.298686	0.29853	0.299538	0.300142	0.300223	0.300206	0.299851	0.299124	0.298764	0.299197	0.300012	0.300397	0.300245	0.299844	0.299264	0.299273	0.299937	0.299943	0.299409	0.299881	0.301331	0.302148	0.301841	0.300993	0.300121	0.300014	0.300679	0.30124	0.301421	0.301761	0.302328	0.302491	0.302084	0.301603	0.301744	0.302303	0.302459	0.302651	0.303212	0.303294	0.303431
3	0.302132	0.302133	0.302077	0.301976	0.30226	0.303092	0.303441	0.302535	0.301281	0.301609	0.30288	0.30294	0.302513	0.302989	0.303529	0.303252	0.303078	0.303575	0.303778	0.303255	0.30254	0.3021	0.302196	0.302854	0.30355	0.303599	0.30343	0.3041	0.305036	0.305071	0.304676	0.30408	0.30334	0.303513	0.304416	0.304817	0.304387	0.304122	0.304872	0.305795	0.306056	0.306185	0.306461	0.306407	0.306183	0.306466	0.306684	0.306088	0.30594
3	0.289889	0.290243	0.289981	0.289523	0.289938	0.290875	0.290951	0.289754	0.288369	0.288496	0.289333	0.2893	0.289411	0.290473	0.291233	0.291146	0.291008	0.291027	0.290897	0.290601	0.290245	0.289633	0.289198	0.289795	0.290852	0.291056	0.290697	0.291057	0.291763	0.291736	0.291022	0.290012	0.289483	0.290155	0.291329	0.292108	0.292338	0.292397	0.292805	0.293256	0.293264	0.293066	0.29301	0.292956	0.29288	0.293335	0.293823	0.293308	0.293034
3	0.283458	0.283964	0.284128	0.28398	0.284381	0.285194	0.285116	0.283705	0.282236	0.282393	0.283632	0.284302	0.284366	0.284612	0.284872	0.284586	0.284423	0.284841	0.28496	0.284459	0.283882	0.283433	0.283185	0.283658	0.28467	0.285174	0.285233	0.285694	0.286337	0.286186	0.28543	0.28483	0.284515	0.284774	0.285666	0.286595	0.287043	0.287277	0.287544	0.287512	0.287244	0.287065	0.286999	0.286998	0.287189	0.287748	0.288103	0.287484	0.286967
3	0.288654	0.288421	0.288167	0.28826	0.288822	0.289582	0.289812	0.289103	0.288039	0.28813	0.289163	0.289576	0.289515	0.289914	0.29023	0.289928	0.289905	0.290563	0.290947	0.290276	0.28912	0.288281	0.288115	0.288821	0.289663	0.289749	0.289581	0.289825	0.290204	0.290338	0.290255	0.289737	0.288904	0.288926	0.289932	0.290821	0.291086	0.291202	0.291616	0.292047	0.292323	0.292398	0.292072	0.291513	0.291466	0.292303	0.292847	0.292276	0.292036
3	0.26109	0.260839	0.260949	0.261061	0.261218	0.261767	0.261932	0.260788	0.259499	0.260363	0.262245	0.262656	0.262147	0.262086	0.262428	0.262856	0.263382	0.263483	0.263034	0.262603	0.262243	0.261682	0.261189	0.261368	0.26192	0.262123	0.262203	0.262944	0.264138	0.264612	0.264203	0.263336	0.262436	0.262282	0.262658	0.263085	0.263631	0.264282	0.265018	0.265511	0.265519	0.265382	0.265388	0.265418	0.265255	0.265286	0.265652	0.265597	0.265464
3	0.297444	0.297271	0.29692	0.296621	0.297043	0.298121	0.298762	0.298235	0.297168	0.297455	0.298671	0.298906	0.298423	0.298303	0.298592	0.298573	0.298313	0.29838	0.298325	0.297917	0.297967	0.298441	0.298704	0.298901	0.299319	0.29959	0.299419	0.29953	0.300297	0.300616	0.299944	0.299022	0.298309	0.298124	0.298579	0.299281	0.29986	0.30037	0.301108	0.301735	0.301859	0.301853	0.301813	0.301283	0.300704	0.300854	0.301189	0.300949	0.300948
3	0.295692	0.29596	0.295925	0.295795	0.295971	0.296666	0.297092	0.296412	0.29541	0.295829	0.297073	0.297412	0.297091	0.296963	0.296998	0.297097	0.297558	0.298192	0.298445	0.298274	0.298006	0.297462	0.296756	0.296921	0.297748	0.297822	0.297384	0.297802	0.298642	0.298643	0.298165	0.297731	0.297418	0.297459	0.297936	0.298714	0.299123	0.299441	0.300049	0.300242	0.300004	0.299925	0.30009	0.299958	0.29965	0.300194	0.301013	0.300683	0.300286
3	0.295719	0.295761	0.295744	0.2956	0.295766	0.296622	0.29704	0.295798	0.294027	0.294151	0.295846	0.296739	0.296449	0.296428	0.296774	0.296631	0.296243	0.296118	0.296036	0.295756	0.295919	0.296263	0.295934	0.295823	0.296244	0.296192	0.296019	0.296608	0.297555	0.297906	0.297469	0.296543	0.295667	0.29572	0.296568	0.297369	0.297879	0.298384	0.29902	0.299303	0.299108	0.299124	0.299177	0.298656	0.298476	0.299341	0.299908	0.299263	0.298715
3	0.285713	0.285402	0.284847	0.284277	0.284349	0.285197	0.28577	0.285053	0.283809	0.28428	0.285901	0.286407	0.286021	0.286122	0.286613	0.286763	0.286584	0.286459	0.2866	0.286638	0.286121	0.285221	0.284682	0.284998	0.285678	0.286088	0.286452	0.286853	0.28687	0.286663	0.286741	0.286714	0.286338	0.286672	0.287705	0.288271	0.288146	0.288082	0.288518	0.288986	0.289258	0.289359	0.289272	0.289293	0.289411	0.289696	0.289878	0.289325	0.28904
3	0.299004	0.298548	0.298085	0.298085	0.299291	0.300941	0.301163	0.299622	0.298158	0.298589	0.299762	0.300053	0.299917	0.300164	0.300653	0.300749	0.300707	0.301207	0.301672	0.301159	0.300055	0.299279	0.29949	0.300507	0.30129	0.301264	0.300981	0.301267	0.301754	0.301574	0.301123	0.300792	0.300334	0.300504	0.301486	0.302254	0.302611	0.303015	0.303415	0.303559	0.303485	0.30342	0.303596	0.303525	0.303135	0.303533	0.30436	0.304265	0.303848
3	0.295787	0.296159	0.296263	0.296141	0.296119	0.296736	0.297526	0.297211	0.296284	0.296442	0.296703	0.296032	0.295762	0.296483	0.297158	0.297093	0.296912	0.297158	0.297337	0.296736	0.295715	0.295056	0.295216	0.296153	0.296797	0.296556	0.296348	0.29687	0.297495	0.297724	0.297782	0.297466	0.297044	0.297337	0.298005	0.298348	0.298236	0.298326	0.298989	0.299307	0.29915	0.299254	0.299365	0.299163	0.299158	0.29958	0.299874	0.299729	0.299786
3	0.27683	0.276486	0.276033	0.275742	0.275938	0.276684	0.277247	0.276501	0.274977	0.275008	0.276304	0.276932	0.277223	0.27776	0.277809	0.277269	0.277179	0.277748	0.278174	0.277906	0.277063	0.276385	0.276311	0.276737	0.27735	0.277469	0.277255	0.277757	0.278771	0.279126	0.278584	0.277557	0.276869	0.277383	0.278377	0.278653	0.27827	0.27815	0.278791	0.279767	0.280452	0.280651	0.280647	0.280365	0.279801	0.279809	0.28031	0.280382	0.280589
3	0.292909	0.292965	0.293188	0.293589	0.293975	0.294562	0.294843	0.293665	0.29171	0.291442	0.292865	0.293978	0.294197	0.294086	0.294231	0.294753	0.295395	0.295584	0.295054	0.294071	0.293225	0.293013	0.293115	0.293477	0.29438	0.295117	0.295116	0.295173	0.295654	0.295677	0.295042	0.294436	0.294315	0.294625	0.294992	0.295269	0.295662	0.296286	0.297044	0.297639	0.297803	0.297779	0.297654	0.297039	0.296351	0.29647	0.296832	0.296745	0.297105
3	0.314766	0.314857	0.315354	0.315553	0.31563	0.316195	0.316483	0.315373	0.313698	0.313575	0.314918	0.316095	0.316358	0.316341	0.316551	0.31628	0.315738	0.315805	0.316053	0.315851	0.315434	0.314873	0.314541	0.315256	0.316329	0.316579	0.316364	0.316474	0.316853	0.316846	0.316406	0.316062	0.316002	0.316263	0.316843	0.317375	0.31725	0.316997	0.31754	0.318288	0.318394	0.318171	0.318025	0.3178	0.317689	0.318138	0.318853	0.319001	0.318787
3	0.285019	0.284835	0.284481	0.284402	0.284596	0.284819	0.284723	0.284005	0.282791	0.282658	0.283929	0.284932	0.285135	0.285222	0.28546	0.28547	0.285397	0.285619	0.285896	0.285941	0.285691	0.285105	0.284737	0.285007	0.285415	0.285642	0.285859	0.286309	0.286912	0.287196	0.286877	0.286097	0.285556	0.285888	0.286655	0.287203	0.287463	0.287875	0.288574	0.288794	0.28841	0.288214	0.288493	0.288574	0.288122	0.288093	0.28871	0.289118	0.289424
3	0.324982	0.324568	0.324777	0.324869	0.324867	0.3254	0.325784	0.325064	0.323995	0.324095	0.32484	0.324953	0.324721	0.324831	0.32512	0.325303	0.325708	0.326071	0.325735	0.324936	0.324304	0.324028	0.324266	0.325192	0.325955	0.325576	0.324887	0.325057	0.325676	0.326013	0.325854	0.325131	0.324467	0.324785	0.32582	0.32658	0.326708	0.326697	0.326976	0.327366	0.32762	0.327831	0.328128	0.328176	0.327619	0.327324	0.327915	0.328299	0.328237
3	0.319328	0.319208	0.318648	0.318487	0.319291	0.320343	0.320321	0.319012	0.317595	0.317809	0.318965	0.319312	0.319207	0.31932	0.319395	0.319527	0.320612	0.322097	0.32232	0.321162	0.319664	0.318679	0.318734	0.319681	0.320448	0.320255	0.319744	0.320067	0.320959	0.321388	0.321348	0.320809	0.320121	0.320414	0.32131	0.321996	0.322233	0.322133	0.322337	0.322771	0.323083	0.323332	0.323367	0.323021	0.322472	0.322332	0.322629	0.32248	0.322471
3	0.309713	0.309124	0.309077	0.309522	0.309934	0.310217	0.310169	0.309128	0.307738	0.307874	0.309067	0.309606	0.309553	0.309839	0.310113	0.309966	0.310329	0.311128	0.311374	0.310893	0.310291	0.309765	0.309198	0.309276	0.310003	0.310148	0.309546	0.309581	0.310758	0.311875	0.312058	0.311238	0.310182	0.31016	0.310965	0.311729	0.31215	0.3125	0.313214	0.313724	0.313385	0.312737	0.312603	0.312737	0.312416	0.31219	0.31263	0.313006	0.313389
3	0.284651	0.284833	0.284376	0.283524	0.283464	0.284786	0.285852	0.284989	0.283138	0.282898	0.284275	0.285024	0.284636	0.284556	0.285074	0.285104	0.285005	0.285325	0.285286	0.284609	0.284058	0.283928	0.284109	0.284783	0.285467	0.285363	0.284915	0.285277	0.286364	0.286871	0.286324	0.28531	0.28456	0.284824	0.285878	0.286646	0.28671	0.286776	0.287283	0.287607	0.287513	0.28757	0.28801	0.28818	0.287864	0.287971	0.28831	0.287867	0.28763
3	0.318253	0.31804	0.317447	0.316986	0.317141	0.318018	0.318454	0.317446	0.316093	0.316353	0.317556	0.317902	0.31781	0.318098	0.318425	0.318653	0.318901	0.318902	0.31878	0.318664	0.318217	0.317456	0.317129	0.31778	0.318687	0.318842	0.318441	0.318631	0.319636	0.320251	0.320086	0.319341	0.318119	0.317805	0.319024	0.32022	0.320102	0.319564	0.319965	0.320822	0.321224	0.32131	0.321427	0.321264	0.320692	0.320463	0.320607	0.320525	0.320916
3	0.342643	0.34272	0.342548	0.341976	0.341896	0.342858	0.343642	0.343	0.341483	0.341252	0.342355	0.342974	0.342995	0.343306	0.343687	0.343353	0.342932	0.343076	0.343431	0.343525	0.343225	0.342526	0.341806	0.342149	0.343147	0.34331	0.342816	0.34293	0.343797	0.34424	0.344029	0.343545	0.34305	0.343331	0.343934	0.344204	0.344395	0.344569	0.34494	0.34545	0.345764	0.345805	0.345651	0.345614	0.345996	0.346479	0.34631	0.345634	0.345624
3	0.301404	0.301279	0.300667	0.300101	0.300345	0.301188	0.301606	0.300874	0.299497	0.29945	0.300609	0.301051	0.300613	0.300499	0.300968	0.301293	0.301621	0.301942	0.301733	0.301167	0.300848	0.300824	0.300653	0.300683	0.301134	0.301398	0.301424	0.301729	0.302354	0.30267	0.302454	0.302016	0.301548	0.30152	0.302084	0.30261	0.302735	0.302968	0.303612	0.304159	0.304429	0.304826	0.305113	0.304678	0.304185	0.304426	0.304537	0.303983	0.303813
3	0.293762	0.294172	0.294552	0.294447	0.294143	0.294302	0.2945	0.293921	0.292963	0.292904	0.293453	0.293373	0.293221	0.293893	0.294783	0.295309	0.295705	0.295989	0.295767	0.295047	0.29453	0.294047	0.293348	0.293551	0.294437	0.294585	0.294192	0.294154	0.294699	0.295223	0.295035	0.294159	0.293209	0.293273	0.294369	0.295422	0.296007	0.29621	0.296387	0.296848	0.29723	0.297294	0.29712	0.296618	0.296137	0.296588	0.297607	0.297591	0.297169
3	0.3	0.300457	0.300447	0.300154	0.300462	0.3014	0.301523	0.3001	0.298471	0.298633	0.3	0.300623	0.300417	0.300545	0.30101	0.301085	0.301233	0.301401	0.301043	0.300782	0.301094	0.301111	0.300545	0.300455	0.300912	0.301047	0.301166	0.301996	0.302866	0.303072	0.302967	0.302507	0.301923	0.301972	0.302295	0.302666	0.303183	0.303351	0.303236	0.303275	0.303254	0.303157	0.303306	0.303361	0.303124	0.303173	0.303625	0.303826	0.304015
3	0.299161	0.298752	0.298384	0.298022	0.298406	0.299618	0.300126	0.299298	0.298467	0.299179	0.300196	0.299853	0.299225	0.299459	0.299857	0.299802	0.300224	0.301206	0.301479	0.300863	0.300378	0.300302	0.300301	0.300469	0.300647	0.300363	0.300053	0.300765	0.301845	0.301875	0.301222	0.30052	0.299854	0.299913	0.300803	0.301709	0.302035	0.302012	0.30238	0.302974	0.303153	0.302977	0.302966	0.303193	0.303278	0.303425	0.303398	0.302708	0.302436
3	0.283838	0.283994	0.28403	0.283864	0.283998	0.28467	0.284928	0.283863	0.282358	0.282451	0.283769	0.284692	0.285043	0.285115	0.285096	0.284966	0.284979	0.285449	0.285613	0.284946	0.284207	0.283655	0.283362	0.283803	0.284584	0.284921	0.284866	0.285091	0.285701	0.285883	0.285213	0.284114	0.283237	0.283393	0.284594	0.285816	0.286327	0.286416	0.28672	0.287157	0.287289	0.287206	0.28704	0.286818	0.286945	0.28744	0.287523	0.287027	0.287027
3	0.313456	0.313407	0.313271	0.313004	0.313197	0.313936	0.314459	0.314241	0.313571	0.313557	0.314189	0.314308	0.314018	0.314431	0.315245	0.315226	0.314708	0.314599	0.314578	0.314305	0.314189	0.314124	0.314015	0.314096	0.314222	0.314199	0.314135	0.314584	0.315555	0.316003	0.315427	0.314536	0.314073	0.314431	0.315279	0.315846	0.316246	0.31686	0.317353	0.317413	0.317446	0.317513	0.317293	0.317028	0.31689	0.317104	0.317409	0.317132	0.317051
3	0.290062	0.290192	0.290427	0.290312	0.290569	0.291512	0.291763	0.290364	0.288877	0.28937	0.290474	0.290447	0.290335	0.291029	0.291679	0.291512	0.291485	0.291962	0.291894	0.291163	0.29042	0.289847	0.289529	0.289849	0.290902	0.291855	0.291991	0.291991	0.29237	0.292521	0.292129	0.291363	0.290812	0.291125	0.29195	0.292628	0.292962	0.293311	0.293792	0.294018	0.294047	0.294167	0.294152	0.293748	0.293425	0.293834	0.294493	0.294212	0.29374
3	0.337996	0.338119	0.338163	0.337537	0.337215	0.337896	0.338545	0.337865	0.336276	0.33632	0.337774	0.338346	0.338208	0.338136	0.337918	0.337632	0.337968	0.338727	0.339081	0.339035	0.339037	0.338813	0.338293	0.338302	0.338951	0.339374	0.339231	0.339181	0.339522	0.339789	0.33981	0.339283	0.338356	0.338334	0.339476	0.34059	0.340729	0.340509	0.340876	0.341224	0.341164	0.341328	0.34157	0.341545	0.341761	0.342232	0.3421	0.341172	0.340899
3	0.317306	0.317567	0.317527	0.316887	0.316549	0.317206	0.317504	0.316597	0.31563	0.316272	0.317815	0.318352	0.318185	0.318274	0.318402	0.318549	0.318938	0.319015	0.318601	0.318157	0.317839	0.317393	0.316997	0.317348	0.318143	0.318277	0.317909	0.318274	0.319518	0.32038	0.320317	0.319554	0.318271	0.31769	0.318565	0.319952	0.320609	0.320661	0.321033	0.321477	0.321497	0.321241	0.320976	0.320665	0.320161	0.320146	0.320806	0.321276	0.321529
3	0.330768	0.330412	0.330183	0.330223	0.330675	0.33149	0.331749	0.330654	0.329204	0.329402	0.330937	0.331807	0.33153	0.331377	0.331701	0.331649	0.331637	0.332192	0.332418	0.331854	0.331107	0.330395	0.32998	0.330297	0.330846	0.330871	0.330658	0.330997	0.331767	0.332361	0.332613	0.332174	0.331231	0.331155	0.332101	0.332791	0.332676	0.332798	0.33364	0.334024	0.333939	0.334236	0.334536	0.334318	0.334067	0.334395	0.334839	0.334609	0.334281
3	0.305724	0.305773	0.305905	0.305633	0.305563	0.306392	0.307082	0.306452	0.305148	0.305007	0.305952	0.306689	0.307089	0.30723	0.306895	0.306468	0.306728	0.307363	0.307459	0.306956	0.306287	0.305445	0.305161	0.306211	0.307282	0.307126	0.306548	0.306776	0.307643	0.307922	0.307259	0.306505	0.306233	0.306688	0.307728	0.308705	0.309056	0.308882	0.308724	0.308632	0.308538	0.308854	0.30958	0.309903	0.309822	0.309958	0.310095	0.309875	0.309733
3	0.318765	0.319068	0.319248	0.31894	0.318727	0.319153	0.319583	0.31888	0.31751	0.317676	0.319071	0.319484	0.3191	0.319511	0.32027	0.320194	0.320028	0.320286	0.320346	0.320263	0.32017	0.319313	0.318228	0.318346	0.319358	0.319864	0.319554	0.319824	0.320986	0.321481	0.321086	0.320547	0.319946	0.319818	0.320453	0.321051	0.32092	0.320819	0.321552	0.322383	0.322802	0.32289	0.322859	0.322686	0.322108	0.321912	0.322193	0.321896	0.321757
4	0.283076	0.282915	0.282692	0.282795	0.282911	0.28284	0.282811	0.283212	0.283783	0.283771	0.283534	0.283412	0.283276	0.283296	0.283488	0.283519	0.283133	0.282751	0.282727	0.283054	0.283777	0.284423	0.284384	0.283959	0.283699	0.283562	0.283671	0.284447	0.285351	0.285513	0.285217	0.285147	0.285375	0.285464	0.285312	0.285271	0.285154	0.2847	0.284526	0.285176	0.285797	0.285477	0.285227	0.285893	0.286719	0.287189	0.287223	0.286891	0.286702
4	0.309138	0.308945	0.30858	0.307899	0.307753	0.308498	0.309222	0.309275	0.309052	0.309153	0.309546	0.30969	0.309422	0.308985	0.308817	0.308925	0.30893	0.308926	0.30869	0.308235	0.308615	0.309616	0.309963	0.309745	0.309506	0.309404	0.309578	0.309777	0.309816	0.30978	0.309838	0.310237	0.310531	0.310442	0.31066	0.311055	0.311104	0.311013	0.310887	0.310784	0.31063	0.310456	0.310976	0.312113	0.312809	0.312846	0.312634	0.312412	0.31228
4	0.292206	0.291838	0.291595	0.291799	0.292276	0.292668	0.292795	0.29266	0.292571	0.292794	0.293045	0.292923	0.292693	0.292853	0.293378	0.293534	0.292955	0.292259	0.291726	0.291468	0.291909	0.292617	0.29282	0.292955	0.293424	0.293816	0.294157	0.294426	0.294349	0.29419	0.294157	0.294191	0.294214	0.29429	0.294533	0.294456	0.294208	0.294668	0.295483	0.29581	0.295292	0.294319	0.294129	0.295098	0.296085	0.296205	0.295844	0.295872	0.296513
4	0.295407	0.295661	0.295456	0.294976	0.294831	0.29526	0.295719	0.295509	0.294791	0.294436	0.295011	0.29593	0.296464	0.29659	0.296448	0.296106	0.295749	0.295785	0.295744	0.295412	0.295939	0.2971	0.297585	0.297232	0.296775	0.296802	0.296991	0.297055	0.297316	0.297589	0.297613	0.297871	0.298176	0.297786	0.297251	0.297178	0.29733	0.29765	0.297949	0.298148	0.298287	0.298034	0.297765	0.297997	0.298372	0.298739	0.298978	0.299129	0.299417
4	0.30515	0.304792	0.304444	0.304302	0.304725	0.30536	0.305442	0.305324	0.305122	0.304801	0.304964	0.305141	0.304701	0.304381	0.304682	0.304999	0.304874	0.304684	0.304762	0.304844	0.304864	0.305016	0.305084	0.305079	0.305206	0.305189	0.305236	0.305974	0.306859	0.30683	0.306406	0.306562	0.306768	0.306554	0.306651	0.307003	0.307001	0.30684	0.306727	0.306784	0.306559	0.305928	0.306147	0.307282	0.308083	0.308278	0.308199	0.308305	0.309007
4	0.312434	0.311972	0.311555	0.311557	0.312025	0.312551	0.312884	0.312947	0.312894	0.313067	0.313494	0.313557	0.313238	0.313079	0.313024	0.312871	0.312422	0.311916	0.311764	0.312144	0.31299	0.313475	0.313258	0.313148	0.313377	0.313488	0.31374	0.314298	0.314345	0.313696	0.31334	0.313751	0.314154	0.314013	0.314159	0.314727	0.314843	0.314896	0.3154	0.315599	0.315179	0.314809	0.314944	0.315594	0.316204	0.316393	0.316423	0.31647	0.316651
4	0.307221	0.30658	0.305972	0.305912	0.306473	0.306967	0.307053	0.306966	0.306769	0.30674	0.307312	0.307921	0.307875	0.307486	0.307521	0.308059	0.308134	0.307534	0.306915	0.30668	0.307136	0.30787	0.308287	0.308542	0.308752	0.308787	0.308496	0.308304	0.308681	0.308957	0.30891	0.30917	0.309616	0.309806	0.309847	0.309685	0.309307	0.309338	0.309808	0.310031	0.309803	0.309617	0.31005	0.310775	0.311303	0.311842	0.311985	0.31156	0.311618
4	0.308016	0.30727	0.307339	0.30799	0.308686	0.309183	0.309358	0.309094	0.308568	0.308186	0.308019	0.307819	0.307877	0.308229	0.30841	0.308641	0.309007	0.309008	0.308341	0.307782	0.308407	0.309557	0.309677	0.309078	0.309072	0.309566	0.309898	0.310217	0.310619	0.31034	0.309463	0.309227	0.30955	0.30945	0.309392	0.309889	0.310215	0.310167	0.310124	0.310205	0.310336	0.310203	0.310124	0.310713	0.311368	0.311844	0.312359	0.312453	0.312551
4	0.312819	0.312726	0.312664	0.312648	0.312675	0.312764	0.312725	0.312697	0.312795	0.312812	0.313079	0.313412	0.313388	0.313444	0.313506	0.313453	0.313425	0.313071	0.312378	0.312216	0.31289	0.313264	0.313327	0.314186	0.315054	0.314843	0.314139	0.313946	0.314392	0.314452	0.313867	0.313952	0.314834	0.315188	0.315018	0.315055	0.315216	0.315188	0.315199	0.3155	0.315578	0.315258	0.315311	0.316105	0.316982	0.317365	0.317292	0.317242	0.317315
4	0.281026	0.28037	0.280222	0.280778	0.281391	0.281545	0.281514	0.281665	0.281898	0.281882	0.281603	0.281394	0.281438	0.28157	0.28172	0.2818	0.281524	0.281059	0.280784	0.280942	0.281714	0.28248	0.282635	0.282565	0.282421	0.282347	0.282632	0.28323	0.283885	0.283844	0.283314	0.28344	0.283946	0.283885	0.283349	0.282912	0.283025	0.28345	0.283652	0.283851	0.283953	0.283526	0.283373	0.284217	0.285252	0.285677	0.28563	0.28542	0.28536
4	0.31657	0.316217	0.316029	0.31649	0.316957	0.316887	0.316658	0.316724	0.316867	0.31675	0.316755	0.317058	0.317536	0.317818	0.317697	0.317358	0.316851	0.316507	0.316262	0.316058	0.316456	0.317043	0.317147	0.317269	0.317517	0.317543	0.317504	0.31765	0.318001	0.318057	0.317822	0.318165	0.318968	0.3193	0.319142	0.318877	0.31861	0.318709	0.319279	0.319618	0.319186	0.318391	0.318415	0.319605	0.320835	0.321515	0.321657	0.321164	0.320576
4	0.304962	0.305391	0.305472	0.305432	0.305587	0.305963	0.306242	0.306252	0.306017	0.305671	0.305689	0.305692	0.305443	0.305862	0.306726	0.306741	0.305841	0.305273	0.305249	0.305064	0.305003	0.30538	0.305786	0.306096	0.306289	0.306305	0.306444	0.306893	0.307385	0.307302	0.306747	0.306609	0.30683	0.306909	0.306951	0.307026	0.30726	0.307557	0.307677	0.307753	0.307631	0.307276	0.307187	0.30785	0.309003	0.309695	0.309537	0.309298	0.30962
4	0.343969	0.343663	0.344166	0.344372	0.344199	0.344105	0.344305	0.344799	0.345069	0.344747	0.344536	0.344585	0.344388	0.344177	0.344271	0.344671	0.344956	0.344961	0.344582	0.343985	0.344201	0.345155	0.345887	0.346151	0.345939	0.345363	0.345017	0.345105	0.345255	0.345243	0.34512	0.345543	0.346342	0.346352	0.345953	0.34609	0.346574	0.346859	0.346988	0.347197	0.346962	0.346383	0.346584	0.347753	0.348674	0.348827	0.348774	0.348306	0.347807
4	0.292285	0.291473	0.291151	0.290937	0.290962	0.291172	0.291435	0.291828	0.291975	0.291928	0.292188	0.292565	0.29273	0.292764	0.292612	0.292233	0.29165	0.291233	0.291136	0.291126	0.291567	0.292384	0.292765	0.292879	0.293311	0.293714	0.293864	0.294011	0.294148	0.294095	0.293824	0.293515	0.293251	0.293111	0.293474	0.294181	0.294353	0.293962	0.293917	0.294445	0.294767	0.29442	0.29423	0.29481	0.29549	0.29563	0.295205	0.294998	0.295698
4	0.354465	0.353866	0.353594	0.353685	0.354167	0.354622	0.354675	0.354799	0.355073	0.354806	0.35431	0.354479	0.355225	0.355884	0.355803	0.354709	0.353639	0.353782	0.354273	0.354109	0.35437	0.355344	0.355676	0.355414	0.355536	0.356005	0.35635	0.356438	0.356307	0.355942	0.355776	0.356277	0.356697	0.356551	0.356467	0.356519	0.356753	0.357203	0.357383	0.357266	0.357003	0.356882	0.357376	0.358155	0.358469	0.358412	0.358362	0.358369	0.358615
4	0.319359	0.318774	0.318872	0.319339	0.319394	0.318932	0.318661	0.31908	0.319514	0.31923	0.318934	0.319237	0.319757	0.320364	0.320809	0.32064	0.320226	0.319934	0.319424	0.318898	0.319128	0.319952	0.32044	0.320367	0.320064	0.319784	0.319961	0.320843	0.32181	0.32217	0.322041	0.321711	0.321232	0.320904	0.321275	0.321739	0.321505	0.321271	0.321558	0.321858	0.321743	0.321625	0.321987	0.322619	0.32311	0.323325	0.323276	0.323026	0.323176
4	0.290825	0.290576	0.290496	0.290524	0.290638	0.29061	0.290519	0.291075	0.291787	0.291815	0.291634	0.291412	0.29114	0.291071	0.291208	0.291558	0.29171	0.291608	0.2914	0.291162	0.291802	0.292998	0.293284	0.292795	0.292474	0.29242	0.292218	0.29223	0.292701	0.292894	0.292961	0.293245	0.293149	0.292926	0.293317	0.293778	0.293853	0.293807	0.293934	0.29442	0.294414	0.293488	0.293171	0.294144	0.295112	0.295383	0.295164	0.294962	0.295251
4	0.317879	0.317512	0.317157	0.31712	0.317647	0.318445	0.319082	0.319284	0.318822	0.3181	0.318067	0.318254	0.318072	0.318291	0.318867	0.319095	0.318904	0.318667	0.31836	0.318151	0.318681	0.319267	0.319216	0.319301	0.319605	0.319713	0.319875	0.320114	0.320342	0.320309	0.320108	0.320417	0.320872	0.320794	0.320525	0.320435	0.320408	0.320426	0.320808	0.321551	0.321778	0.321093	0.320874	0.321916	0.323025	0.323423	0.323177	0.322754	0.322818
4	0.317345	0.31721	0.316752	0.316681	0.317075	0.317249	0.316958	0.316779	0.316877	0.317078	0.317587	0.317931	0.317982	0.318186	0.318469	0.318512	0.318049	0.317637	0.31758	0.317719	0.318088	0.318539	0.319056	0.319379	0.319188	0.318835	0.318622	0.318575	0.318814	0.319105	0.319069	0.319067	0.319421	0.319664	0.319589	0.319388	0.319334	0.319422	0.319429	0.319521	0.319683	0.319768	0.320035	0.320606	0.321126	0.321434	0.3214	0.321215	0.321449
4	0.346563	0.345772	0.345631	0.34603	0.346267	0.34623	0.34619	0.346144	0.345818	0.345495	0.345957	0.346552	0.346311	0.345648	0.345245	0.345361	0.345498	0.345301	0.3449	0.34466	0.345169	0.345975	0.346343	0.346498	0.346663	0.346761	0.346979	0.347396	0.347605	0.347288	0.346853	0.346911	0.347221	0.347339	0.347482	0.347535	0.347179	0.34696	0.347504	0.348228	0.34807	0.347307	0.347322	0.348341	0.349342	0.349935	0.350035	0.34949	0.348709
4	0.308432	0.308453	0.308726	0.309094	0.309332	0.309377	0.309226	0.308825	0.308522	0.308752	0.30922	0.309417	0.309492	0.30942	0.309075	0.30886	0.3089	0.309077	0.309226	0.309387	0.309801	0.310049	0.309701	0.309408	0.309649	0.309893	0.310089	0.310639	0.310937	0.310229	0.309445	0.309741	0.310303	0.31041	0.31059	0.310612	0.310453	0.31083	0.311391	0.311487	0.311059	0.310478	0.310619	0.311458	0.311908	0.311953	0.312117	0.312334	0.312663
4	0.314714	0.314352	0.314065	0.314219	0.314437	0.314528	0.314687	0.31505	0.315569	0.315753	0.31556	0.315303	0.314925	0.314845	0.31546	0.316115	0.316164	0.316085	0.315965	0.315817	0.316496	0.317266	0.316887	0.316397	0.316496	0.316414	0.316175	0.316321	0.3168	0.31704	0.316939	0.317012	0.317232	0.317259	0.317363	0.317481	0.317393	0.317367	0.317326	0.317524	0.317821	0.317601	0.317609	0.318516	0.319522	0.319816	0.319593	0.319527	0.320022
4	0.331822	0.33141	0.331191	0.331054	0.331274	0.331795	0.332101	0.3322	0.332187	0.33208	0.332393	0.332806	0.332543	0.331952	0.331609	0.331589	0.331758	0.331946	0.331647	0.331162	0.331449	0.332381	0.333059	0.332985	0.332615	0.332539	0.33277	0.333044	0.333427	0.333811	0.333916	0.334014	0.333962	0.333701	0.333922	0.334434	0.334534	0.334362	0.334534	0.335141	0.335206	0.334411	0.334102	0.334861	0.335809	0.336369	0.336324	0.336055	0.336284
4	0.314184	0.313773	0.31388	0.313955	0.314315	0.314782	0.314717	0.314461	0.314329	0.314373	0.314586	0.314696	0.314654	0.314696	0.315125	0.315547	0.315343	0.314955	0.314593	0.314339	0.314569	0.314732	0.314665	0.31496	0.31531	0.315247	0.31527	0.315694	0.316009	0.315977	0.315936	0.316161	0.316529	0.316954	0.317448	0.317527	0.317052	0.316518	0.31623	0.316236	0.316239	0.31626	0.317095	0.318449	0.318886	0.31853	0.318451	0.318622	0.318715
4	0.375388	0.374779	0.374452	0.374384	0.374336	0.374327	0.374452	0.374622	0.37467	0.374724	0.375105	0.375719	0.375673	0.374924	0.374744	0.375436	0.375831	0.375554	0.375009	0.374567	0.375101	0.376021	0.376027	0.375974	0.376466	0.376575	0.376044	0.375936	0.376806	0.377231	0.376594	0.37622	0.376412	0.376655	0.377032	0.377331	0.377385	0.377501	0.377571	0.377246	0.376722	0.376441	0.376889	0.37818	0.379002	0.378735	0.37824	0.377976	0.378331
4	0.331439	0.331781	0.331653	0.331136	0.330661	0.330468	0.330551	0.330757	0.330943	0.331289	0.332001	0.332618	0.332497	0.331822	0.331404	0.331626	0.331684	0.331123	0.330619	0.330677	0.331338	0.331987	0.33197	0.331859	0.332119	0.332236	0.332137	0.332325	0.33283	0.332838	0.332535	0.332907	0.333305	0.333189	0.333314	0.333487	0.333172	0.332946	0.333415	0.334081	0.33372	0.33267	0.332767	0.334042	0.335045	0.335358	0.335274	0.335238	0.335509
4	0.336286	0.335439	0.334805	0.334767	0.33491	0.3351	0.335486	0.33596	0.336118	0.335787	0.335756	0.336148	0.336436	0.336603	0.336543	0.336154	0.335513	0.335088	0.335104	0.335353	0.335888	0.33647	0.336578	0.336669	0.337084	0.337212	0.337286	0.337671	0.338038	0.3383	0.338374	0.338169	0.337925	0.338094	0.338806	0.339148	0.338672	0.338117	0.338043	0.338354	0.338332	0.338007	0.33832	0.339336	0.340101	0.340409	0.340501	0.340127	0.339764
4	0.319791	0.319014	0.318164	0.317948	0.318438	0.318596	0.318462	0.318641	0.318524	0.318002	0.318046	0.318646	0.319148	0.319429	0.31973	0.320052	0.319714	0.318924	0.318366	0.318344	0.319342	0.320611	0.320667	0.319811	0.319171	0.319021	0.319486	0.320395	0.320948	0.32056	0.319921	0.320019	0.320277	0.32024	0.320824	0.321719	0.32173	0.321396	0.321628	0.321997	0.321649	0.320897	0.32073	0.320978	0.321335	0.322051	0.322667	0.322821	0.322834
4	0.321004	0.320677	0.32034	0.319996	0.319703	0.320168	0.320839	0.320498	0.319613	0.319221	0.319595	0.320362	0.320992	0.321252	0.321068	0.320766	0.320516	0.320363	0.320237	0.320253	0.320948	0.321801	0.321832	0.321542	0.321769	0.322165	0.322118	0.321792	0.321927	0.322294	0.322286	0.322134	0.322068	0.322313	0.322976	0.323383	0.323254	0.323182	0.323239	0.323299	0.323093	0.322346	0.322118	0.322939	0.323712	0.324192	0.324437	0.324279	0.324409
4	0.322639	0.322042	0.322067	0.32258	0.322644	0.322233	0.322415	0.323078	0.323263	0.32329	0.323814	0.324255	0.324283	0.324288	0.324351	0.324134	0.323059	0.321774	0.321294	0.321767	0.322767	0.323602	0.323935	0.323672	0.323239	0.323304	0.323905	0.324742	0.325269	0.324927	0.324377	0.324438	0.32484	0.325304	0.32588	0.326194	0.326051	0.325712	0.325306	0.325033	0.324779	0.324559	0.324911	0.325765	0.326365	0.326572	0.326701	0.326694	0.326763
4	0.306961	0.306965	0.307126	0.306969	0.306598	0.306591	0.306916	0.30747	0.307726	0.307406	0.307113	0.306995	0.306952	0.3073	0.307555	0.307323	0.307065	0.306965	0.306598	0.306074	0.30643	0.307244	0.307435	0.307442	0.307618	0.307731	0.307976	0.308452	0.308694	0.308339	0.308069	0.308609	0.309101	0.308933	0.308779	0.308773	0.309106	0.309766	0.309758	0.309391	0.309317	0.309002	0.30879	0.309528	0.310642	0.311183	0.310843	0.310158	0.310344
4	0.318354	0.3183	0.318145	0.317955	0.317914	0.318047	0.318276	0.318554	0.318442	0.318049	0.318263	0.318847	0.319005	0.318752	0.318345	0.317988	0.318006	0.318429	0.318561	0.318219	0.318276	0.318881	0.31923	0.31938	0.319726	0.319893	0.319962	0.320357	0.320677	0.320391	0.320046	0.320489	0.321088	0.320988	0.320795	0.32079	0.320634	0.320621	0.321	0.32132	0.320858	0.320053	0.320184	0.321078	0.32186	0.322436	0.322676	0.322667	0.322816
4	0.334161	0.333864	0.33346	0.333309	0.333374	0.333724	0.334213	0.334445	0.334181	0.333912	0.33405	0.334205	0.334286	0.33435	0.334303	0.334056	0.333401	0.332893	0.332784	0.332863	0.333616	0.334762	0.335311	0.335402	0.335262	0.33469	0.334392	0.335041	0.336106	0.336313	0.335686	0.335422	0.335573	0.335782	0.336258	0.336849	0.3371	0.336912	0.33656	0.336733	0.337274	0.336946	0.336345	0.336807	0.337633	0.338073	0.338102	0.337908	0.337985
4	0.344851	0.344795	0.344909	0.344909	0.345027	0.345416	0.345603	0.345366	0.345298	0.345743	0.346123	0.345966	0.345605	0.345229	0.344978	0.345158	0.345333	0.345132	0.344776	0.344871	0.345662	0.346157	0.346053	0.346178	0.346168	0.345688	0.34571	0.34648	0.347174	0.347234	0.347039	0.347007	0.346883	0.34673	0.346886	0.346957	0.34699	0.347537	0.348307	0.348855	0.348725	0.348057	0.347941	0.34858	0.349092	0.349235	0.349226	0.349178	0.349428
4	0.29574	0.294904	0.294583	0.294781	0.29489	0.29487	0.295219	0.295977	0.296386	0.296376	0.296493	0.296466	0.296363	0.296325	0.296126	0.296071	0.296204	0.296237	0.295839	0.295394	0.295876	0.296893	0.297193	0.296912	0.29685	0.297021	0.29723	0.29741	0.297501	0.297263	0.296818	0.296779	0.297264	0.297701	0.297842	0.297946	0.298014	0.297887	0.297683	0.297682	0.297847	0.29801	0.298438	0.299058	0.299257	0.299407	0.299815	0.299845	0.299662
4	0.325239	0.324934	0.324593	0.324485	0.324747	0.325189	0.325455	0.325356	0.325211	0.325195	0.324924	0.324553	0.324698	0.325255	0.325631	0.325534	0.325003	0.324716	0.324786	0.32498	0.325746	0.326438	0.326108	0.325582	0.325569	0.325672	0.325842	0.326203	0.32686	0.327395	0.327277	0.32702	0.327009	0.327062	0.32707	0.327048	0.327175	0.327335	0.327347	0.327537	0.327573	0.327202	0.327552	0.328672	0.329176	0.328997	0.328913	0.328944	0.328888
4	0.346502	0.346487	0.346332	0.346178	0.346697	0.346972	0.346713	0.346975	0.347264	0.347002	0.346871	0.34707	0.347042	0.34671	0.346527	0.346583	0.346508	0.346351	0.346165	0.345888	0.346029	0.346454	0.346726	0.347319	0.347703	0.347047	0.346599	0.347237	0.348023	0.348212	0.348154	0.348317	0.348304	0.347857	0.3478	0.348366	0.348899	0.348933	0.348616	0.348596	0.348462	0.347752	0.347581	0.348468	0.349542	0.350474	0.350888	0.350328	0.349777
4	0.340767	0.340306	0.339968	0.340036	0.340578	0.341311	0.341667	0.341633	0.341504	0.341692	0.34198	0.34177	0.341247	0.341045	0.341168	0.341191	0.340862	0.340425	0.340221	0.340344	0.340997	0.341735	0.342028	0.342273	0.342514	0.342507	0.342356	0.342137	0.342146	0.342174	0.342087	0.342678	0.343543	0.343667	0.343494	0.343372	0.3431	0.342928	0.343175	0.343663	0.343546	0.342863	0.342855	0.343638	0.3443	0.344545	0.344422	0.344373	0.344632
4	0.294764	0.294673	0.294604	0.294697	0.294968	0.294983	0.294821	0.295046	0.295621	0.296014	0.296066	0.296021	0.29606	0.295773	0.295123	0.294952	0.295059	0.295011	0.294861	0.294678	0.295184	0.296069	0.296285	0.29627	0.296352	0.296187	0.295793	0.295593	0.295953	0.296415	0.296767	0.297152	0.297329	0.297352	0.297504	0.297549	0.297485	0.297622	0.297878	0.298051	0.297723	0.29712	0.297124	0.297658	0.298117	0.298664	0.299191	0.299317	0.299317
4	0.332484	0.331729	0.330584	0.330377	0.331214	0.332059	0.332778	0.333096	0.332555	0.331997	0.332034	0.332307	0.33249	0.332317	0.331874	0.332021	0.332659	0.33277	0.332235	0.331801	0.332154	0.332748	0.33276	0.332689	0.332857	0.333016	0.333292	0.333492	0.333578	0.333717	0.333891	0.33422	0.334387	0.334181	0.333842	0.333491	0.333515	0.333707	0.333681	0.333925	0.334016	0.333537	0.333726	0.335038	0.335957	0.335651	0.334955	0.334726	0.335019
4	0.292844	0.29281	0.293204	0.293456	0.29338	0.293081	0.292886	0.293086	0.293647	0.294015	0.293576	0.292693	0.292213	0.292751	0.29384	0.294206	0.293546	0.29273	0.292456	0.292731	0.293236	0.293452	0.293325	0.293464	0.29422	0.295017	0.295217	0.294664	0.29377	0.293544	0.2938	0.293783	0.293802	0.294124	0.294545	0.294743	0.294569	0.294519	0.29491	0.295393	0.295702	0.295627	0.295415	0.295755	0.296416	0.296875	0.297152	0.297288	0.297389
4	0.287998	0.288147	0.287979	0.287172	0.286298	0.286007	0.286432	0.287347	0.287643	0.287433	0.287654	0.287614	0.287273	0.287779	0.288875	0.289562	0.289414	0.28882	0.288587	0.288905	0.289308	0.289247	0.288733	0.28849	0.289002	0.28957	0.289539	0.28895	0.288434	0.288827	0.289327	0.289017	0.288672	0.288951	0.289515	0.289847	0.289856	0.289896	0.290226	0.290513	0.290442	0.290137	0.290068	0.290567	0.291048	0.291216	0.291279	0.291288	0.29149
4	0.284906	0.285363	0.285481	0.285073	0.284997	0.285133	0.285072	0.285052	0.285026	0.285185	0.285584	0.285497	0.284948	0.28498	0.285657	0.285948	0.285348	0.284639	0.284696	0.284996	0.2851	0.285228	0.285226	0.285446	0.286323	0.286873	0.28625	0.28498	0.284203	0.284651	0.285713	0.286499	0.286493	0.285946	0.28595	0.286182	0.286049	0.286166	0.286541	0.287048	0.28759	0.287656	0.287647	0.287816	0.287602	0.287328	0.287416	0.287322	0.287151
4	0.281864	0.281825	0.281912	0.281542	0.281005	0.280862	0.280889	0.281207	0.281864	0.282105	0.281852	0.281482	0.280944	0.28095	0.282026	0.282835	0.282405	0.281665	0.281671	0.2822	0.282396	0.282068	0.281714	0.281925	0.282841	0.283434	0.283052	0.282348	0.281946	0.282032	0.281954	0.281368	0.281223	0.281969	0.282902	0.283477	0.283839	0.284102	0.284178	0.284078	0.283805	0.283262	0.283171	0.28424	0.285375	0.285742	0.285608	0.285022	0.284472
4	0.278162	0.278762	0.278875	0.278002	0.277514	0.277942	0.278567	0.279104	0.279263	0.279004	0.278537	0.277948	0.277816	0.278772	0.279815	0.27955	0.278459	0.277768	0.277992	0.278696	0.278947	0.278777	0.279058	0.279559	0.279886	0.280145	0.279889	0.279179	0.278883	0.279316	0.279478	0.27905	0.278867	0.27875	0.278452	0.278531	0.279131	0.279695	0.279901	0.28004	0.280129	0.280124	0.280336	0.280676	0.280714	0.2806	0.280787	0.281089	0.28127
4	0.296758	0.296851	0.296896	0.29672	0.29643	0.296089	0.295615	0.296078	0.297356	0.297616	0.296737	0.296059	0.295997	0.296471	0.29745	0.297661	0.296597	0.296152	0.296969	0.2979	0.298533	0.298595	0.297967	0.297495	0.297565	0.297664	0.297728	0.297804	0.297655	0.297666	0.297907	0.297853	0.297744	0.297932	0.298235	0.298484	0.2984	0.298122	0.298308	0.298957	0.299175	0.298504	0.298149	0.298971	0.299716	0.299628	0.299532	0.299508	0.299629
4	0.285377	0.285473	0.285301	0.284929	0.285084	0.285337	0.285319	0.285757	0.286396	0.286539	0.285954	0.284781	0.284063	0.284777	0.285864	0.285919	0.285371	0.285008	0.285046	0.285522	0.286019	0.286051	0.285808	0.285939	0.286677	0.287068	0.286672	0.286148	0.286097	0.286774	0.287303	0.28723	0.28712	0.287158	0.287356	0.287434	0.287343	0.287777	0.288663	0.289114	0.288809	0.287902	0.287265	0.287757	0.288756	0.289234	0.289035	0.288662	0.288663
4	0.310553	0.310009	0.310378	0.310678	0.310735	0.31057	0.310395	0.310733	0.311119	0.311101	0.310915	0.310463	0.310104	0.310616	0.311381	0.311563	0.311405	0.311291	0.311061	0.310842	0.311233	0.311636	0.311453	0.311429	0.31174	0.311634	0.311265	0.311146	0.311377	0.311965	0.312412	0.312503	0.312244	0.311882	0.31203	0.312432	0.312544	0.31248	0.312465	0.31251	0.312629	0.31259	0.312752	0.313795	0.314561	0.314201	0.313804	0.313514	0.313233
4	0.302616	0.302911	0.303296	0.303223	0.302734	0.302345	0.302372	0.302792	0.303175	0.303192	0.302802	0.301976	0.301268	0.301693	0.302607	0.302893	0.3029	0.30314	0.303362	0.303187	0.30295	0.302953	0.30318	0.30341	0.303591	0.303836	0.303917	0.303569	0.303217	0.303777	0.304403	0.303986	0.303208	0.302922	0.303256	0.303588	0.303473	0.303462	0.304161	0.305128	0.305376	0.304697	0.304087	0.304135	0.304549	0.305351	0.306032	0.305791	0.305167
4	0.307694	0.30801	0.30838	0.308237	0.307965	0.308388	0.308745	0.308372	0.307996	0.307861	0.307253	0.306189	0.305716	0.306458	0.307744	0.308576	0.30845	0.307903	0.307981	0.308539	0.309062	0.309473	0.309647	0.309675	0.309642	0.309439	0.309442	0.309388	0.308969	0.308928	0.308954	0.308726	0.308746	0.309106	0.309522	0.309418	0.308982	0.30909	0.309478	0.309621	0.309848	0.309886	0.309914	0.310594	0.311197	0.31137	0.311428	0.311393	0.311528
4	0.266392	0.266471	0.266661	0.266311	0.266119	0.266398	0.2662	0.265824	0.266259	0.267079	0.267279	0.266968	0.266668	0.266765	0.267312	0.267441	0.267016	0.266834	0.267042	0.267557	0.268092	0.268214	0.268123	0.26826	0.26859	0.26872	0.268635	0.268286	0.267973	0.268492	0.269078	0.268783	0.268435	0.268669	0.268741	0.268402	0.268387	0.26858	0.268615	0.26893	0.269388	0.269166	0.268699	0.268955	0.269616	0.270277	0.270756	0.270661	0.270488
4	0.278645	0.279196	0.279139	0.277907	0.277327	0.277846	0.278113	0.278309	0.278785	0.279014	0.278773	0.278103	0.277461	0.277831	0.278766	0.278746	0.278133	0.277949	0.27805	0.278372	0.278898	0.278843	0.278414	0.27875	0.27955	0.280139	0.280296	0.279623	0.278891	0.279072	0.279568	0.279921	0.280198	0.280242	0.280197	0.280286	0.280281	0.280095	0.280068	0.280371	0.280581	0.280027	0.279601	0.280436	0.281271	0.281208	0.28114	0.281263	0.281345
4	0.307416	0.307579	0.3082	0.308419	0.307983	0.307655	0.307862	0.308157	0.307923	0.307708	0.307974	0.30786	0.307407	0.307815	0.308629	0.308498	0.307643	0.307325	0.308096	0.308914	0.30884	0.308652	0.308786	0.308644	0.308205	0.308058	0.308583	0.309035	0.308733	0.308349	0.308253	0.308349	0.308642	0.30882	0.308608	0.308227	0.308258	0.308761	0.30917	0.309592	0.310313	0.31044	0.310009	0.31006	0.310581	0.311183	0.311183	0.310459	0.310001
4	0.265299	0.264876	0.264547	0.264361	0.264194	0.264051	0.264256	0.265025	0.265776	0.265921	0.265441	0.264656	0.264078	0.264123	0.264486	0.264492	0.264416	0.264688	0.264904	0.264992	0.265304	0.265673	0.265888	0.266257	0.266675	0.266523	0.265895	0.26522	0.264955	0.26545	0.266178	0.26661	0.26669	0.266361	0.266014	0.266054	0.266347	0.26674	0.266892	0.266744	0.26683	0.266985	0.266861	0.266834	0.267092	0.267414	0.267742	0.268128	0.268383
4	0.309714	0.309753	0.309958	0.310064	0.310377	0.310664	0.310254	0.30962	0.309649	0.310119	0.310279	0.309778	0.309135	0.3096	0.310971	0.311614	0.311321	0.310793	0.310369	0.310427	0.310669	0.310669	0.310764	0.311063	0.311503	0.311699	0.311109	0.310374	0.310575	0.311604	0.312096	0.311445	0.310645	0.31061	0.311176	0.311624	0.311681	0.311727	0.312177	0.31281	0.312886	0.312322	0.312244	0.3131	0.313729	0.313633	0.31347	0.313439	0.313395
4	0.287191	0.287502	0.287913	0.287599	0.28718	0.287262	0.287318	0.287253	0.287332	0.28762	0.287885	0.287569	0.286869	0.286939	0.287929	0.288513	0.288072	0.287491	0.287646	0.28842	0.289108	0.289159	0.28877	0.288463	0.288413	0.288244	0.287938	0.287876	0.288116	0.288651	0.289186	0.289352	0.288891	0.288271	0.288091	0.288191	0.288669	0.289331	0.289488	0.289442	0.289745	0.289723	0.289542	0.290164	0.290865	0.290759	0.290266	0.289939	0.290037
4	0.28319	0.282944	0.282854	0.28245	0.282335	0.282776	0.282993	0.283259	0.283943	0.284327	0.284055	0.283385	0.282912	0.28319	0.283792	0.284081	0.283783	0.283251	0.28325	0.283534	0.283721	0.284159	0.284438	0.284049	0.283987	0.284683	0.284947	0.284281	0.283782	0.284105	0.284301	0.283958	0.283821	0.284312	0.285252	0.285763	0.285558	0.285543	0.285896	0.28626	0.28647	0.286313	0.286102	0.286145	0.286356	0.286705	0.286957	0.28693	0.28688
4	0.288109	0.288549	0.288953	0.288519	0.287854	0.287396	0.287326	0.287693	0.287987	0.288092	0.288081	0.287658	0.287335	0.287803	0.288513	0.288545	0.287956	0.287696	0.288113	0.288581	0.288767	0.288682	0.288604	0.288762	0.288967	0.289143	0.289075	0.288708	0.288538	0.288765	0.289009	0.288981	0.288901	0.289138	0.28931	0.28919	0.289345	0.289678	0.289831	0.289859	0.289958	0.290111	0.290335	0.290784	0.290932	0.290918	0.291107	0.29092	0.290689
4	0.269119	0.269757	0.270037	0.269646	0.26933	0.269096	0.269167	0.269663	0.269875	0.269753	0.269621	0.269158	0.268811	0.269427	0.27026	0.270392	0.270211	0.270345	0.27064	0.270654	0.270505	0.27048	0.270507	0.270551	0.270804	0.270944	0.270925	0.270983	0.270807	0.270648	0.270805	0.270924	0.27084	0.270838	0.270948	0.270957	0.271145	0.271663	0.272175	0.272514	0.272688	0.272589	0.272328	0.272364	0.272697	0.272918	0.273039	0.273145	0.273222
4	0.291675	0.291955	0.291935	0.291612	0.291226	0.29102	0.291226	0.292106	0.292735	0.292266	0.291858	0.291738	0.291118	0.290832	0.291558	0.29249	0.29286	0.292565	0.292117	0.292056	0.292266	0.292445	0.292643	0.292952	0.293167	0.293006	0.292666	0.292466	0.292383	0.292538	0.292856	0.293187	0.293494	0.293686	0.293859	0.294097	0.294263	0.294159	0.294145	0.294489	0.294927	0.294839	0.29432	0.294395	0.294772	0.294857	0.294781	0.294593	0.294649
4	0.291811	0.292304	0.292137	0.291653	0.291446	0.291224	0.290921	0.291255	0.291796	0.291625	0.291006	0.290488	0.29031	0.290792	0.291631	0.291671	0.29083	0.290334	0.29059	0.291397	0.292228	0.292218	0.291884	0.292277	0.293099	0.293507	0.293331	0.292694	0.292295	0.292791	0.293024	0.292184	0.291334	0.291311	0.29188	0.292509	0.293017	0.293538	0.29388	0.293776	0.293337	0.292757	0.292593	0.293357	0.294212	0.294292	0.294045	0.293789	0.293781
4	0.289274	0.289597	0.289849	0.289922	0.290343	0.290824	0.290839	0.29091	0.291031	0.290555	0.289961	0.289704	0.289473	0.289536	0.28976	0.289386	0.288932	0.289544	0.290818	0.291363	0.290853	0.290219	0.290337	0.291102	0.291853	0.292241	0.29225	0.291851	0.291468	0.291411	0.291053	0.290548	0.290739	0.291225	0.291329	0.291301	0.291351	0.291447	0.291886	0.292553	0.292661	0.292139	0.292055	0.292792	0.29362	0.294275	0.294489	0.293982	0.293437
4	0.314244	0.314277	0.314107	0.313564	0.313545	0.313902	0.31375	0.313557	0.313757	0.31399	0.313858	0.313241	0.312578	0.312741	0.313713	0.314096	0.313457	0.313122	0.313602	0.314162	0.314479	0.314629	0.314768	0.315063	0.315381	0.315603	0.315571	0.314727	0.313897	0.314362	0.31494	0.314843	0.314745	0.314819	0.315295	0.31602	0.316349	0.31616	0.315969	0.316084	0.316274	0.316163	0.315919	0.316208	0.316646	0.316726	0.316702	0.316428	0.316131
4	0.304156	0.304088	0.304376	0.30455	0.304515	0.304601	0.30492	0.30535	0.305403	0.305284	0.30539	0.305371	0.30501	0.305085	0.305827	0.306033	0.305349	0.304774	0.304831	0.305215	0.305406	0.305182	0.304893	0.304931	0.305494	0.306055	0.306032	0.305637	0.305339	0.305895	0.306738	0.306515	0.305974	0.306441	0.307251	0.307276	0.307036	0.307325	0.307886	0.308066	0.307599	0.306826	0.306505	0.307061	0.307883	0.308317	0.308382	0.308267	0.308204
4	0.269342	0.26952	0.269663	0.269488	0.26913	0.26887	0.26867	0.26856	0.26852	0.268609	0.268493	0.267936	0.267572	0.267883	0.268577	0.268931	0.26861	0.267852	0.267347	0.267918	0.269217	0.269935	0.269647	0.269475	0.270168	0.270659	0.270325	0.269806	0.269595	0.26985	0.270117	0.269892	0.269434	0.269378	0.269907	0.270473	0.270659	0.270658	0.27068	0.270813	0.27107	0.270819	0.270244	0.270587	0.271686	0.272427	0.27233	0.271771	0.27153
4	0.318847	0.318516	0.318435	0.317839	0.317246	0.317114	0.317119	0.317443	0.317903	0.317852	0.31767	0.317973	0.318155	0.31801	0.317931	0.317463	0.316725	0.31686	0.317627	0.317923	0.318258	0.319027	0.319482	0.319476	0.319457	0.319535	0.319491	0.319005	0.318325	0.318261	0.318494	0.318534	0.318545	0.31847	0.318688	0.319457	0.320032	0.319876	0.319668	0.319935	0.320198	0.320084	0.320214	0.32096	0.3214	0.321274	0.321064	0.320867	0.321061
4	0.295393	0.295023	0.294795	0.294572	0.294619	0.29485	0.295016	0.295614	0.29658	0.297044	0.296562	0.295593	0.294846	0.294843	0.295997	0.297367	0.297279	0.29612	0.295554	0.295868	0.296227	0.296161	0.295645	0.295091	0.295404	0.296355	0.29652	0.29571	0.295021	0.294979	0.295355	0.296065	0.296632	0.296452	0.29612	0.296316	0.296761	0.296931	0.296857	0.297083	0.297475	0.297157	0.296479	0.296799	0.29782	0.298098	0.297545	0.297245	0.297491
4	0.290435	0.290556	0.2907	0.290395	0.2897	0.289329	0.289396	0.289896	0.2905	0.290774	0.290482	0.289761	0.289424	0.289846	0.290444	0.290471	0.289936	0.289656	0.289731	0.289585	0.289702	0.290505	0.291021	0.290812	0.29082	0.291134	0.290914	0.29026	0.290088	0.290708	0.29133	0.291393	0.291264	0.291381	0.291684	0.291896	0.291873	0.291768	0.291944	0.292446	0.292876	0.292694	0.292318	0.292489	0.292696	0.292698	0.292772	0.292545	0.292248
4	0.283569	0.283622	0.283721	0.283613	0.283377	0.283051	0.282839	0.283214	0.284091	0.284588	0.284207	0.283431	0.28296	0.283203	0.283911	0.284425	0.284384	0.28404	0.284047	0.284326	0.284352	0.284346	0.284483	0.284708	0.285353	0.285926	0.285567	0.284595	0.284018	0.284217	0.284629	0.284867	0.284936	0.284954	0.285171	0.285513	0.285703	0.285955	0.286308	0.286498	0.286559	0.28622	0.285837	0.286129	0.286643	0.286919	0.2872	0.287447	0.287589
4	0.301428	0.301761	0.301912	0.301688	0.301666	0.301528	0.301156	0.301196	0.301562	0.301921	0.302188	0.301855	0.301041	0.301254	0.302454	0.303081	0.302909	0.30244	0.302075	0.301989	0.302073	0.302227	0.302244	0.302406	0.303143	0.303832	0.303571	0.302445	0.301837	0.302412	0.302888	0.302562	0.302319	0.302819	0.303362	0.303228	0.302856	0.303052	0.303798	0.304461	0.304659	0.304004	0.3031	0.303249	0.304058	0.304478	0.304606	0.304815	0.30505
4	0.311491	0.311393	0.311573	0.311453	0.311141	0.311296	0.311661	0.311678	0.311449	0.31127	0.311146	0.310868	0.310439	0.310368	0.310809	0.31135	0.311537	0.31134	0.311397	0.311684	0.311731	0.311877	0.311936	0.311556	0.311485	0.311898	0.312435	0.312536	0.311998	0.311886	0.312301	0.312602	0.312555	0.312144	0.312136	0.312728	0.313194	0.31321	0.313108	0.313459	0.313949	0.313744	0.313195	0.313317	0.313933	0.314364	0.314418	0.313834	0.313336
4	0.286791	0.286719	0.286691	0.286582	0.286462	0.286254	0.286119	0.286507	0.28695	0.286856	0.286427	0.285766	0.285261	0.285621	0.286598	0.28726	0.287167	0.286749	0.286565	0.286616	0.286769	0.286998	0.287232	0.287487	0.287883	0.288007	0.287495	0.286832	0.286682	0.287324	0.287898	0.287744	0.287622	0.28797	0.28826	0.288204	0.28802	0.287771	0.287801	0.288363	0.288931	0.289024	0.289003	0.289271	0.289404	0.289487	0.289885	0.289871	0.289324
4	0.285878	0.285929	0.285683	0.284929	0.284693	0.284906	0.284965	0.28519	0.285328	0.284842	0.284076	0.283529	0.283591	0.284396	0.285351	0.285679	0.28545	0.285402	0.285646	0.286016	0.286503	0.286684	0.286461	0.286403	0.286857	0.287218	0.2867	0.285731	0.285275	0.285644	0.286137	0.286057	0.285787	0.285885	0.286357	0.286901	0.287291	0.287301	0.287133	0.287423	0.287841	0.287616	0.287154	0.287316	0.287946	0.288512	0.288681	0.288475	0.288539
4	0.321306	0.322012	0.322769	0.322902	0.323068	0.322793	0.321999	0.321803	0.322167	0.322273	0.321639	0.320605	0.320541	0.321718	0.322452	0.322066	0.321763	0.321959	0.322087	0.322082	0.322343	0.322794	0.322888	0.322828	0.323143	0.323323	0.322927	0.322316	0.32223	0.323055	0.323381	0.322444	0.321653	0.321724	0.322198	0.322506	0.322555	0.322834	0.323255	0.323444	0.323557	0.323505	0.323304	0.323545	0.324006	0.324056	0.324113	0.324555	0.325013
4	0.284135	0.283766	0.283475	0.283427	0.283268	0.282689	0.28255	0.283276	0.283606	0.283384	0.283202	0.283041	0.283096	0.283311	0.283418	0.283596	0.283733	0.283644	0.283806	0.284216	0.284494	0.284659	0.284515	0.284322	0.284783	0.285407	0.285499	0.284922	0.284064	0.283989	0.284281	0.28402	0.283977	0.284503	0.284762	0.284681	0.28486	0.285264	0.285493	0.285628	0.285867	0.285669	0.285089	0.285127	0.285741	0.286275	0.286558	0.286662	0.28677
4	0.276616	0.276559	0.277025	0.276989	0.276551	0.276569	0.277008	0.277194	0.277129	0.277378	0.27729	0.276384	0.275891	0.276654	0.277668	0.277655	0.276988	0.276843	0.277446	0.278151	0.278448	0.278348	0.277996	0.277731	0.277808	0.27808	0.278273	0.277917	0.277449	0.277839	0.278512	0.278627	0.278408	0.278253	0.278484	0.278932	0.279223	0.27941	0.279397	0.279224	0.279257	0.279138	0.278908	0.279217	0.279464	0.279474	0.279727	0.279898	0.280089
4	0.289947	0.29003	0.290697	0.290603	0.289702	0.289232	0.289473	0.289995	0.290334	0.290131	0.289568	0.288989	0.288809	0.289743	0.291313	0.291953	0.291233	0.290169	0.289936	0.290419	0.290593	0.290661	0.291038	0.291214	0.291331	0.291565	0.291577	0.291146	0.29051	0.290588	0.291159	0.2912	0.290981	0.291043	0.291251	0.29144	0.291749	0.292256	0.29267	0.292972	0.293159	0.292518	0.291691	0.292282	0.293461	0.293672	0.293111	0.292504	0.29242
4	0.284875	0.285319	0.285322	0.284613	0.284156	0.284356	0.284724	0.28532	0.285887	0.286051	0.286055	0.285632	0.284985	0.285187	0.2859	0.286002	0.285549	0.285299	0.285529	0.28579	0.28603	0.286578	0.286783	0.286511	0.286809	0.287365	0.287168	0.286155	0.285495	0.286031	0.28641	0.286032	0.286009	0.28648	0.286886	0.287119	0.287366	0.287807	0.288313	0.288899	0.289105	0.288246	0.287623	0.288403	0.289446	0.289738	0.289449	0.289006	0.288997
4	0.282672	0.283289	0.283821	0.283481	0.283008	0.28293	0.28293	0.283212	0.283772	0.284345	0.284467	0.283799	0.283192	0.283594	0.28472	0.28535	0.284826	0.284259	0.284293	0.28444	0.284415	0.284087	0.284011	0.284291	0.284469	0.284643	0.284508	0.283643	0.283081	0.283836	0.284627	0.284518	0.284434	0.284833	0.285222	0.285137	0.285124	0.285565	0.285729	0.285599	0.285438	0.284876	0.284576	0.285406	0.286327	0.286458	0.286263	0.285983	0.285998
4	0.282153	0.282637	0.282689	0.282304	0.282112	0.281937	0.282057	0.282582	0.282764	0.282763	0.282735	0.282358	0.281791	0.281576	0.282009	0.282614	0.28274	0.282491	0.282476	0.282645	0.282691	0.282812	0.283028	0.283476	0.284284	0.28489	0.284951	0.284615	0.284215	0.283947	0.283621	0.283265	0.283086	0.283448	0.284189	0.284338	0.284195	0.284777	0.285535	0.285672	0.285569	0.285322	0.284995	0.285147	0.285273	0.285062	0.284837	0.284472	0.284427
1	0.346232	0.345892	0.345785	0.345733	0.346522	0.347575	0.347747	0.347689	0.347688	0.347053	0.346632	0.347145	0.347519	0.347596	0.347326	0.346407	0.346097	0.34664	0.346796	0.346351	0.346165	0.346605	0.347047	0.347039	0.34698	0.347163	0.347539	0.34766	0.347061	0.346378	0.346326	0.346824	0.34725	0.346884	0.346089	0.345861	0.345967	0.34577	0.345639	0.345773	0.345898	0.346379	0.347137	0.347162	0.346859	0.346945	0.346909	0.346912	0.34681
1	0.335548	0.336177	0.336131	0.335492	0.335474	0.335968	0.336073	0.335934	0.335742	0.335474	0.335642	0.336022	0.335728	0.335067	0.334674	0.334491	0.334606	0.335076	0.335475	0.33571	0.336099	0.336281	0.33611	0.335926	0.335965	0.336274	0.336473	0.336252	0.335707	0.335311	0.335234	0.335374	0.335516	0.335444	0.335306	0.33533	0.335558	0.335474	0.335101	0.335131	0.335475	0.335848	0.336374	0.336678	0.336401	0.33612	0.335918	0.335641	0.335864
1	0.345716	0.346516	0.346933	0.346852	0.347419	0.348505	0.348726	0.347889	0.346748	0.345874	0.345999	0.346932	0.347641	0.347742	0.34748	0.347036	0.346357	0.345989	0.346111	0.345761	0.345008	0.345172	0.34622	0.346749	0.346767	0.346656	0.346067	0.345674	0.345726	0.345737	0.345978	0.346164	0.345944	0.345598	0.345137	0.344972	0.345211	0.345413	0.345679	0.346083	0.346421	0.346605	0.346653	0.346612	0.346373	0.345986	0.345658	0.34531	0.34493
1	0.330346	0.33091	0.331055	0.330744	0.33068	0.330871	0.330949	0.330838	0.330611	0.330371	0.330057	0.329952	0.330336	0.330736	0.33038	0.3296	0.329252	0.329428	0.329607	0.32927	0.32898	0.329212	0.32945	0.329459	0.329634	0.329942	0.330208	0.330231	0.329582	0.329024	0.329158	0.329219	0.329019	0.328837	0.328565	0.328614	0.329002	0.328742	0.328082	0.32837	0.329279	0.329658	0.329848	0.330164	0.330236	0.330108	0.329627	0.328834	0.328632
1	0.336765	0.336941	0.33669	0.33629	0.33637	0.336743	0.336698	0.336098	0.335419	0.335291	0.335667	0.335979	0.336094	0.336143	0.335857	0.335368	0.335289	0.335654	0.335909	0.335743	0.335736	0.336217	0.336642	0.336613	0.33625	0.335517	0.33498	0.335127	0.335289	0.335281	0.335155	0.335049	0.33529	0.335469	0.335348	0.33544	0.335548	0.335017	0.334575	0.334963	0.335276	0.335214	0.335553	0.336049	0.33607	0.335664	0.33525	0.33513	0.335405
1	0.311925	0.311443	0.311543	0.311667	0.312022	0.312483	0.312412	0.31196	0.311646	0.311642	0.311868	0.312464	0.313172	0.313295	0.312829	0.312209	0.311658	0.311481	0.311816	0.312153	0.311875	0.311484	0.311551	0.311719	0.311922	0.312094	0.312346	0.312669	0.31244	0.312097	0.312065	0.311997	0.3123	0.31286	0.313014	0.312724	0.312025	0.311414	0.311707	0.312459	0.312537	0.312409	0.312696	0.312769	0.3126	0.312558	0.312497	0.312564	0.312818
1	0.30991	0.310122	0.309893	0.309232	0.309229	0.309929	0.310394	0.310572	0.31057	0.310131	0.309698	0.309925	0.310451	0.310748	0.310786	0.310543	0.309948	0.309358	0.309386	0.309877	0.309835	0.309308	0.309323	0.309885	0.31043	0.310656	0.310723	0.31049	0.309847	0.309949	0.310817	0.311031	0.310673	0.310486	0.310339	0.310423	0.310733	0.31043	0.309889	0.309932	0.310343	0.311105	0.311849	0.31172	0.310924	0.310317	0.310257	0.310645	0.311024
1	0.306929	0.30709	0.307207	0.307217	0.30742	0.307769	0.308277	0.308507	0.308025	0.307395	0.307134	0.307312	0.307755	0.308233	0.308511	0.308394	0.307871	0.307163	0.306726	0.306969	0.307261	0.307215	0.307405	0.307508	0.307247	0.306861	0.306622	0.306633	0.30656	0.306742	0.307437	0.307883	0.308024	0.308119	0.307735	0.307215	0.307222	0.307455	0.307563	0.30749	0.307067	0.306999	0.307774	0.308383	0.308249	0.307807	0.307335	0.30707	0.307211
1	0.328092	0.328318	0.328242	0.328367	0.329092	0.329715	0.329428	0.328615	0.328304	0.328557	0.328719	0.32862	0.328713	0.328958	0.328721	0.328328	0.328211	0.328089	0.32801	0.328236	0.328377	0.328431	0.32872	0.329109	0.3294	0.329314	0.329339	0.32931	0.328734	0.328678	0.329006	0.328517	0.328079	0.328538	0.328856	0.328533	0.327973	0.327389	0.327307	0.327874	0.328269	0.328354	0.328643	0.328993	0.328989	0.329051	0.329484	0.329799	0.32951
1	0.332154	0.332117	0.331811	0.331766	0.332436	0.333213	0.333333	0.332991	0.332504	0.331799	0.331172	0.331066	0.331392	0.332047	0.332463	0.332288	0.332078	0.331871	0.331498	0.331571	0.33213	0.332496	0.332615	0.332597	0.33215	0.331171	0.330671	0.331162	0.331456	0.331237	0.331205	0.331333	0.331452	0.331809	0.332309	0.33243	0.332008	0.331349	0.33118	0.331317	0.331066	0.33118	0.331792	0.331969	0.331885	0.332174	0.332321	0.332065	0.332165
1	0.316816	0.317133	0.31736	0.317029	0.316842	0.317345	0.317947	0.318117	0.318218	0.318126	0.31773	0.317721	0.318192	0.318509	0.318387	0.317832	0.317259	0.317482	0.318098	0.318225	0.318013	0.317974	0.318255	0.318657	0.319002	0.318859	0.318136	0.31737	0.316887	0.316978	0.317723	0.31837	0.318139	0.317629	0.317623	0.317662	0.317431	0.317121	0.317066	0.317272	0.317081	0.316869	0.317438	0.318311	0.3188	0.318812	0.318616	0.318521	0.318584
1	0.318735	0.318542	0.318271	0.318169	0.318833	0.319821	0.320175	0.319905	0.319268	0.318243	0.317496	0.317793	0.318577	0.319111	0.319184	0.318864	0.318686	0.31903	0.319279	0.318785	0.31815	0.318315	0.318886	0.319273	0.319828	0.320089	0.319891	0.31986	0.31963	0.319109	0.318714	0.318376	0.318231	0.318656	0.319205	0.319197	0.318793	0.318419	0.318624	0.319184	0.319109	0.319026	0.319621	0.319818	0.319445	0.319464	0.319618	0.31944	0.319333
1	0.278142	0.278046	0.277882	0.277961	0.278612	0.279343	0.27964	0.279566	0.279342	0.279083	0.279074	0.279252	0.279274	0.279436	0.27974	0.279699	0.279491	0.279475	0.279551	0.279532	0.279044	0.278566	0.278856	0.279256	0.279487	0.279719	0.279732	0.279492	0.279069	0.279092	0.279727	0.280132	0.280069	0.279709	0.279144	0.278896	0.278926	0.278543	0.278156	0.278348	0.278621	0.278737	0.278947	0.279167	0.27924	0.279404	0.279739	0.280017	0.280166
1	0.304842	0.304856	0.304485	0.304288	0.304818	0.30547	0.305355	0.304741	0.304548	0.304522	0.304148	0.304093	0.304767	0.305464	0.305402	0.305001	0.305081	0.30518	0.304674	0.304027	0.303967	0.304617	0.305213	0.305324	0.305582	0.305897	0.305616	0.3048	0.3041	0.304355	0.305082	0.304978	0.304179	0.303845	0.304151	0.30438	0.304301	0.304113	0.304274	0.304652	0.304564	0.304407	0.304829	0.305308	0.30563	0.305989	0.305699	0.305031	0.305121
1	0.29381	0.294148	0.294343	0.294104	0.293747	0.293894	0.293903	0.293504	0.29338	0.293439	0.293653	0.293977	0.29387	0.293335	0.292751	0.292645	0.292831	0.292661	0.292274	0.292528	0.293275	0.293416	0.293256	0.293284	0.29337	0.293424	0.293322	0.29312	0.292947	0.293093	0.293538	0.293915	0.294181	0.294256	0.293646	0.292529	0.291745	0.291641	0.292328	0.293198	0.293234	0.292961	0.293301	0.293726	0.293602	0.293287	0.293222	0.293389	0.293627
2	0.371434	0.371049	0.370281	0.369928	0.370546	0.371642	0.372226	0.372249	0.371761	0.370894	0.37054	0.370878	0.371314	0.371591	0.371491	0.370958	0.370401	0.370231	0.370136	0.369968	0.370321	0.371173	0.371656	0.37126	0.370785	0.370673	0.370592	0.370426	0.370153	0.370253	0.370698	0.370769	0.370683	0.370931	0.370987	0.370544	0.370277	0.370272	0.370532	0.371208	0.371221	0.37066	0.370672	0.370706	0.370366	0.370273	0.37051	0.370802	0.370841
2	0.357546	0.356899	0.357145	0.357527	0.35816	0.358821	0.358737	0.358548	0.358348	0.357735	0.357458	0.358023	0.358681	0.358679	0.357871	0.357006	0.35695	0.357529	0.357794	0.357619	0.357536	0.357512	0.357852	0.358648	0.35892	0.358201	0.357841	0.358236	0.358142	0.357881	0.358141	0.358214	0.357891	0.357946	0.358446	0.35871	0.358596	0.358567	0.358765	0.358813	0.35838	0.357761	0.357689	0.358091	0.35832	0.358398	0.358392	0.35839	0.358476
2	0.355394	0.355176	0.355359	0.355451	0.355697	0.356346	0.356778	0.35674	0.356038	0.354966	0.354761	0.355382	0.355591	0.355275	0.355011	0.355163	0.355441	0.355584	0.355788	0.355811	0.355561	0.35545	0.355526	0.355362	0.354893	0.354671	0.355167	0.35554	0.355226	0.355353	0.356	0.356205	0.355921	0.355431	0.354929	0.354766	0.354938	0.354985	0.355315	0.356065	0.355947	0.355402	0.355723	0.356245	0.356357	0.356406	0.356368	0.3561	0.356068
2	0.348379	0.349034	0.349129	0.348513	0.348036	0.348485	0.349275	0.349145	0.348104	0.34759	0.3482	0.348882	0.348835	0.348612	0.348291	0.347659	0.347419	0.347918	0.348449	0.348562	0.348354	0.348157	0.348257	0.348163	0.34813	0.348419	0.348279	0.347838	0.347747	0.348058	0.348502	0.348507	0.348094	0.348031	0.348064	0.348117	0.348864	0.349557	0.349232	0.348476	0.348014	0.34829	0.349182	0.349243	0.348414	0.348301	0.348813	0.349031	0.348924
2	0.35781	0.358118	0.358195	0.358291	0.359143	0.360071	0.359911	0.359325	0.359006	0.358966	0.35937	0.359828	0.359797	0.359479	0.359177	0.35885	0.358674	0.359066	0.359314	0.358874	0.358542	0.358515	0.358604	0.358383	0.357706	0.357615	0.358509	0.359117	0.35888	0.358756	0.358682	0.358257	0.358086	0.358056	0.357708	0.357548	0.357877	0.358036	0.35784	0.358049	0.358573	0.358844	0.358862	0.358375	0.357745	0.357886	0.358544	0.359117	0.359254
2	0.283225	0.283973	0.284005	0.283967	0.284389	0.284948	0.284965	0.284443	0.283903	0.28371	0.283872	0.283912	0.283628	0.283749	0.284117	0.283922	0.283387	0.283241	0.283594	0.283842	0.283747	0.283887	0.284445	0.284747	0.284815	0.284789	0.284902	0.285295	0.285284	0.284925	0.28467	0.284511	0.284474	0.28463	0.284505	0.283917	0.283643	0.283943	0.284522	0.285029	0.284778	0.284324	0.284903	0.286057	0.286711	0.28669	0.286295	0.285921	0.285931
2	0.334521	0.334833	0.33491	0.334835	0.335177	0.335799	0.335764	0.33546	0.335289	0.334969	0.334758	0.335016	0.335563	0.336177	0.336575	0.336408	0.336041	0.335977	0.335852	0.335545	0.335721	0.336219	0.336369	0.336052	0.335918	0.336208	0.336429	0.336408	0.33621	0.33616	0.336502	0.337051	0.337242	0.337019	0.336679	0.33644	0.336596	0.336741	0.336696	0.336845	0.337052	0.337225	0.337628	0.338142	0.338578	0.338789	0.338517	0.338294	0.33863
2	0.303735	0.303398	0.303249	0.303511	0.303867	0.304097	0.304208	0.304218	0.304052	0.30345	0.302831	0.303227	0.304208	0.304586	0.304336	0.303871	0.303498	0.303703	0.304366	0.304754	0.304762	0.304709	0.304536	0.3043	0.304548	0.305015	0.305111	0.304821	0.304149	0.303792	0.30444	0.305382	0.305661	0.305381	0.30511	0.305209	0.305594	0.305644	0.305561	0.305987	0.306327	0.306313	0.306439	0.306702	0.30687	0.3068	0.30668	0.306683	0.306655
[truncated: 87 more rows]
[truncated: 1,796 more columns]
